# Supplementary material for: Genome-wide association study identifies the SERPINB gene cluster as a susceptibility locus for food allergy
Source: Springer Nature journal article supplement (doi:10.1038/s41467-017-01220-0), 2017-10-16
Supplement: MOESM1 [file 41467_2017_1220_MOESM1_ESM.pdf]

## Description of Additional Supplementary Files

File Name: Supplementary Data 1

Description: Top associated loci ( $P < 1 \times 10^{-3}$  in the discovery set) for any food allergy.
