# Supplementary material for: Genome-wide association study identifies the SERPINB gene cluster as a susceptibility locus for food allergy
Source: Nat Commun. 2017 Oct 20;8:1056. doi: 10.1038/s41467-017-01220-0 (PMC5648765; doi:10.1038/s41467-017-01220-0)
Supplement: Supplementary file 4 — Supplementary Data 1 [file 41467_2017_1220_MOESM4_ESM.xlsx]

## Sheet: SupplementaryData1a
Supplementary Data 1a Top associated loci (P < 1 x 10-3 in the discovery set) for any food allergy
Food allergy						GOFA discovery set			GOFA replication set			Meta-analysis
SNP ID	Status	Chr	Positiona	EA	AA	AF	OR	P value	AF	OR	P value	AF	OR	P value	Gene region
rs4908458	Geno	1	6033973	T	C	0.102	0.63	0.000882998	0.096	1.32	0.0439126	0.1	0.87	0.1805	NPHP4
rs10779706	Imp	1	8986682	T	G	0.891	0.72	0.000928723	0.875	1.025	0.77817	0.886	0.82	0.005739	ENO1-IT1/CA6
rs10803463	Imp	1	14468901	C	T	0.543	1.31	0.000805941	0.541	1.052	0.599998	0.543	1.21	0.003232	PRDM2/KAZN
rs12144274	Imp	1	14492568	A	G	0.111	0.6	0.000766994	0.108	0.992	0.562947	0.11	0.74	0.002797	PRDM2/KAZN
rs4646085	Imp	1	15825411	T	A	0.246	0.74	0.000437729	0.26	0.9	0.564468	0.251	0.8	0.001894	CASP9
rs113734202	Imp	1	17355896	T	G	0.055	0.36	3.82616e-06	0.053	0.893	0.639216	0.054	0.58	9.544e-05	SDHB
rs6697078	Imp	1	18097676	G	A	0.178	0.66	0.000122832	0.165	0.906	0.991839	0.173	0.75	0.002759	ACTL8
rs7516774	Imp	1	24203848	A	G	0.061	1.66	0.000601687	0.056	1.321	0.659215	0.059	1.55	0.003124	CNR2
rs16838065	Imp	1	29581937	A	G	0.07	1.53	0.000211045	0.076	0.938	0.556209	0.072	1.3	0.001107	PTPRU
rs9426371	Imp	1	29804410	C	G	0.081	1.56	0.000814946	0.074	0.841	0.657814	0.079	1.29	0.01937	PTPRU/MATN1
rs71646375	Imp	1	32804975	C	T	0.053	1.59	0.000203565	0.043	1.028	0.806768	0.05	1.41	0.002257	MARCKSL1/TSSK3
rs6693814	Imp	1	35267838	C	T	0.11	0.62	0.000754358	0.106	0.827	0.362951	0.109	0.69	0.001376	SMIM12
rs11588036	Imp	1	36964370	T	G	0.09	0.57	0.000772709	0.085	0.881	0.521059	0.088	0.67	0.002469	CSF3R/GRIK3
rs6695117	Imp	1	36996848	A	T	0.289	1.33	0.000233843	0.293	0.983	0.4705	0.29	1.2	0.01538	CSF3R/GRIK3
rs17103715	Imp	1	48214623	T	C	0.19	1.38	9.39337e-05	0.197	1.202	0.530199	0.193	1.31	0.0005759	FOXD2/TRABD2B
rs1679977	Geno	1	53588494	A	G	0.373	1.26	0.000906625	0.372	1.051	0.375126	0.372	1.18	0.001658	SLC1A7
rs1121422	Imp	1	58978040	A	T	0.295	1.26	0.000716845	0.291	0.913	0.616811	0.293	1.12	0.0198	DAB1/OMA1
rs4915588	Imp	1	61751502	C	T	0.4	1.31	0.000998796	0.397	0.884	0.24187	0.399	1.13	0.0658	NFIA
rs12729555	Imp	1	62285269	T	C	0.084	1.62	3.78141e-05	0.076	0.988	0.742199	0.081	1.39	0.002586	INADL
rs6681523	Imp	1	66314692	T	C	0.724	1.38	3.45702e-05	0.71	0.918	0.252936	0.719	1.17	0.01171	PDE4B
rs7412775	Imp	1	68737674	T	C	0.291	1.31	0.000126847	0.294	1.119	0.313163	0.292	1.24	0.0002908	WLS/RPE65
rs75859170	Imp	1	81459610	C	T	0.117	1.47	0.000335869	0.122	0.85	0.275314	0.118	1.23	0.03402	ELTD1/LPHN2
rs61770696	Imp	1	81490874	T	A	0.233	1.47	2.67065e-05	0.223	0.853	0.224737	0.23	1.23	0.01165	ELTD1/LPHN2
rs645271	Imp	1	86496113	T	C	0.301	0.77	0.000958051	0.285	1.058	0.204713	0.296	0.87	0.07381	COL24A1
rs66507060	Imp	1	91941500	A	G	0.351	0.75	0.000162097	0.358	1.012	0.571103	0.353	0.85	0.009529	HFM1/CDC7
rs6678564	Imp	1	92257650	C	G	0.078	1.58	0.000516261	0.079	1.269	0.349002	0.078	1.47	0.0009776	TGFBR3
rs12026998	Imp	1	102229779	A	C	0.072	0.49	0.000105992	0.065	1.311	0.219031	0.07	0.79	0.02379	S1PR1/OLFM3
rs11809685	Imp	1	107058077	G	A	0.064	1.79	5.22074e-06	0.061	0.951	0.75207	0.063	1.47	0.0007759	AMY1C/PRMT6
rs2255089	Imp	1	111773568	C	G	0.445	1.29	0.0003268	0.445	1.254	0.0114191	0.445	1.28	1.154e-05	CHI3L2
rs1496044	Imp	1	152144275	A	G	0.14	0.6	9.09348e-06	0.132	0.655	0.0806892	0.138	0.62	5.191e-06	RPTN/HRNR
rs12123821	Imp	1	152179152	T	C	0.058	2.55	8.35481e-10	0.06	2.856	6.05745e-07	0.058	2.65	2.578e-15	RPTN/HRNR
rs1686195	Geno	1	164659590	G	A	0.698	0.75	0.000269474	0.686	1.07	0.721706	0.694	0.85	0.008711	PBX1
rs4387163	Geno	1	164995713	A	G	0.61	1.29	0.000480947	0.608	1.013	0.664087	0.61	1.18	0.01406	PBX1/LMX1A
rs56171431	Imp	1	168889292	T	G	0.173	0.7	0.000918091	0.171	0.752	0.259245	0.172	0.72	0.0009898	DPT/ATP1B1
rs10912564	Imp	1	173170618	T	C	0.325	1.33	0.000484253	0.312	1.05	0.309976	0.321	1.22	0.0007809	TNFSF4
rs3861952	Imp	1	173173820	C	T	0.096	1.67	1.8261e-05	0.092	0.817	0.511442	0.095	1.35	0.003312	TNFSF4
rs77177332	Imp	1	177845700	T	G	0.196	1.33	0.00053369	0.201	0.976	0.865417	0.198	1.19	0.00934	BRINP2/SEC16B
rs10797955	Imp	1	184305577	G	C	0.068	1.49	0.000655716	0.084	0.93	0.896811	0.073	1.26	0.006096	TSEN15/C1orf21
rs2786105	Imp	1	197311241	T	C	0.735	0.78	0.00058026	0.725	0.91	0.670397	0.732	0.82	0.003144	CRB1
rs2802771	Imp	1	203522072	G	A	0.541	0.79	0.00025389	0.53	0.897	0.152907	0.537	0.83	0.0001768	OPTC/ATP2B4
rs1660372	Imp	1	214410270	G	T	0.085	0.55	0.000377632	0.093	0.91	0.257451	0.088	0.69	0.0004938	PROX1/SMYD2
rs12029460	Imp	1	217064861	C	A	0.104	1.63	7.82461e-06	0.114	0.872	0.60943	0.107	1.31	0.001511	ESRRG
rs4846811	Imp	1	217246640	G	T	0.334	1.3	0.000316451	0.346	0.98	0.627088	0.338	1.17	0.01208	ESRRG
rs2221067	Imp	1	219077163	C	A	0.424	1.25	0.000700299	0.432	0.834	0.258734	0.426	1.08	0.0521	C1orf143/LYPLAL1
rs75417802	Imp	1	219988625	C	T	0.134	1.3	0.000930536	0.138	1.044	0.576027	0.136	1.2	0.003333	SLC30A10
rs12137250	Imp	1	224160952	A	C	0.574	0.75	0.000278465	0.583	0.95	0.889056	0.577	0.82	0.003433	TP53BP2/FBXO28
rs34363891	Imp	1	229721260	G	A	0.212	1.39	0.000725962	0.225	0.886	0.261732	0.216	1.19	0.0525	ABCB10/TAF5L
rs61836866	Imp	1	231691471	A	G	0.077	1.53	0.00051759	0.085	1.074	0.377671	0.079	1.34	0.001105	TSNAX/TSNAX-DISC1
rs12403985	Geno	1	232418458	G	T	0.179	0.69	0.000664765	0.184	1.045	0.952802	0.181	0.82	0.008749	DISC1-IT1/SIPA1L2
rs12407945	Imp	1	234398692	T	C	0.172	1.35	0.000861294	0.181	1.222	0.528435	0.175	1.3	0.002731	SLC35F3
rs72763882	Imp	1	234555115	T	C	0.069	1.5	0.000888522	0.065	1.203	0.476964	0.068	1.39	0.002364	TARBP1
rs79149380	Imp	1	236911221	T	G	0.062	0.53	0.000370686	0.068	0.915	0.713659	0.064	0.69	0.002613	ACTN2
rs55682601	Imp	1	240158424	T	C	0.1	1.44	0.000261093	0.103	1.144	0.965958	0.101	1.33	0.004724	CHRM3/FMN2
rs2090689	Imp	1	242146145	T	A	0.465	1.31	0.000108819	0.473	0.967	0.459082	0.467	1.17	0.01045	EXO1/MAP1LC3C
rs113733485	Imp	1	245101256	A	C	0.104	0.62	0.000886304	0.081	1.355	0.110228	0.096	0.85	0.1097	HNRNPU/EFCAB2
rs34351065	Imp	1	245695769	T	G	0.398	1.24	0.000590302	0.4	0.976	0.752038	0.399	1.14	0.0129	KIF26B
rs62114506	Imp	2	242793	C	G	0.275	0.75	0.000962027	0.27	0.955	0.423006	0.273	0.82	0.002077	SH3YL1
rs4971371	Geno	2	1076684	T	C	0.62	1.33	0.000244195	0.62	0.935	0.797207	0.62	1.17	0.006833	SNTG2
rs72773097	Imp	2	2668326	A	G	0.225	1.42	0.000141701	0.239	0.917	0.787209	0.229	1.21	0.005052	MYT1L/TSSC1
rs72773101	Imp	2	2675429	A	G	0.198	1.33	0.000352913	0.199	0.849	0.0825333	0.198	1.14	0.08785	MYT1L/TSSC1
rs2709591	Geno	2	9496291	C	T	0.582	1.37	1.95014e-05	0.595	1.175	0.227307	0.586	1.29	4.321e-05	ASAP2
rs72777378	Imp	2	10905591	A	G	0.156	0.63	3.08248e-05	0.17	0.948	0.965415	0.16	0.75	0.001247	ATP6V1C2
rs1734395	Imp	2	10986902	G	T	0.715	0.77	9.65271e-05	0.718	1.082	0.666894	0.716	0.87	0.005488	PDIA6/KCNF1
rs12692481	Geno	2	12585080	C	T	0.214	1.41	2.54097e-06	0.211	0.993	0.949318	0.213	1.25	0.0002035	LPIN1/TRIB2
rs7583338	Imp	2	15035627	C	A	0.094	1.48	0.000507709	0.1	1.08	0.86564	0.096	1.33	0.004783	FAM84A/NBAS
rs3100242	Imp	2	29376213	C	T	0.92	0.61	8.90666e-05	0.927	0.849	0.0713287	0.922	0.68	2.828e-05	CLIP4
rs12472723	Imp	2	36159859	G	A	0.209	0.72	0.000198293	0.206	1.105	0.375421	0.208	0.86	0.01861	FAM98A/CRIM1
rs4670788	Geno	2	38112226	T	C	0.056	1.71	0.00012972	0.052	0.791	0.588443	0.054	1.38	0.008015	CDC42EP3/RMDN2
rs72787113	Imp	2	41089000	T	G	0.267	1.35	0.000292704	0.256	1.017	0.911544	0.263	1.23	0.003752	SLC8A1/C2orf91
rs72613877	Imp	2	41204225	C	T	0.062	1.62	0.000131062	0.058	1.198	0.718662	0.061	1.49	0.001317	SLC8A1/C2orf91
rs34556076	Imp	2	45515714	G	A	0.238	1.28	0.000657321	0.25	1.006	0.688423	0.241	1.18	0.003598	SIX2/SRBD1
rs7558342	Geno	2	46015851	G	T	0.497	0.8	0.000758007	0.485	1.073	0.782834	0.493	0.89	0.01395	PRKCE
rs4606978	Imp	2	48643436	C	A	0.337	1.3	0.000119887	0.346	1.105	0.522654	0.34	1.22	0.0006651	FOXN2/PPP1R21
rs116016217	Imp	2	50934826	T	C	0.062	0.49	0.000477193	0.049	0.901	0.701823	0.058	0.63	0.003001	NRXN1
rs13416205	Imp	2	51713002	G	C	0.259	1.33	0.000780537	0.25	0.895	0.458779	0.256	1.16	0.03065	NRXN1/SCARNA16
rs1346002	Imp	2	53437046	T	C	0.738	1.32	0.000386545	0.733	0.931	0.575972	0.737	1.15	0.01539	NRXN1/SCARNA16
rs150827114	Imp	2	55693849	C	T	0.05	0.49	0.000240906	0.05	1.557	0.053186	0.05	0.85	0.09675	CCDC88A/CCDC104
rs45570331	Imp	2	60735171	A	C	0.067	0.54	0.000341806	0.071	1.228	0.14825	0.068	0.81	0.05813	BCL11A
rs62178041	Imp	2	62761561	C	A	0.128	1.44	0.000103423	0.129	1.3	0.0485639	0.129	1.39	2.007e-05	TMEM17/EHBP1
rs7573532	Imp	2	64360433	A	G	0.505	0.8	0.000767651	0.482	0.889	0.450708	0.497	0.83	0.001943	PELI1
rs13022034	Imp	2	65130925	T	C	0.264	1.31	0.000914884	0.272	0.978	0.900873	0.267	1.18	0.007642	SERTAD2/SLC1A4
rs72807157	Imp	2	76560938	C	T	0.096	1.48	0.000520207	0.102	0.925	0.699688	0.098	1.26	0.01352	GCFC2/LRRTM4
rs62161649	Imp	2	78045851	C	T	0.128	1.44	0.000392193	0.119	1.147	0.259649	0.125	1.34	0.0005145	LRRTM4/REG3G
rs7572448	Imp	2	79356230	G	A	0.557	1.33	7.89914e-05	0.55	0.954	0.869148	0.555	1.17	0.002878	REG1A/REG3A
rs4852536	Geno	2	80104027	G	A	0.083	1.52	0.000503864	0.082	0.726	0.063211	0.083	1.23	0.1194	CTNNA2
rs6547600	Imp	2	85447830	T	C	0.411	0.8	0.000623247	0.411	0.933	0.841398	0.411	0.84	0.005153	TCF7L1
rs612017	Imp	2	97094011	T	A	0.621	1.35	0.000129569	0.631	0.811	0.116815	0.624	1.11	0.0444	NCAPH/NEURL3
rs895522	Geno	2	101559604	C	T	0.54	1.3	0.000115588	0.544	0.849	0.0618576	0.541	1.11	0.06497	NPAS2
rs12712030	Imp	2	109766696	A	G	0.719	1.4	0.000146988	0.721	0.89	0.868589	0.72	1.16	0.004212	SH3RF3
rs4619637	Imp	2	109957036	T	C	0.375	1.3	0.000148348	0.362	1.053	0.255528	0.371	1.2	0.0002394	SH3RF3
rs72825675	Imp	2	112784753	C	T	0.096	0.62	0.00028339	0.1	1.108	0.353035	0.098	0.81	0.0241	MERTK
rs4848978	Geno	2	112816047	C	T	0.716	0.79	0.000214094	0.715	1.13	0.463489	0.716	0.89	0.01494	TMEM87B
rs12467531	Imp	2	115150766	A	G	0.051	0.36	0.000212401	0.046	0.806	0.727941	0.05	0.51	0.001869	ACTR3/DPP10
rs7595438	Geno	2	119039841	C	T	0.385	1.28	0.000493659	0.389	0.95	0.683225	0.386	1.15	0.01364	INSIG2/EN1
rs1432307	Geno	2	122971252	C	T	0.522	0.78	0.000469769	0.515	1.209	0.114614	0.52	0.92	0.08069	TSN/CNTNAP5
rs1405604	Geno	2	123354282	G	A	0.631	0.78	0.000491537	0.63	1.028	0.754476	0.631	0.86	0.003526	TSN/CNTNAP5
rs10205772	Imp	2	127534896	C	G	0.699	1.35	0.000664428	0.709	1.116	0.998589	0.702	1.26	0.007868	GYPC/AC114783.1
rs9784001	Imp	2	129478625	G	A	0.117	1.45	1.27782e-05	0.121	1.171	0.414375	0.118	1.35	8.918e-05	HS6ST1/RAB6C
rs60294795	Imp	2	137329934	T	C	0.075	0.5	6.41809e-05	0.068	0.905	0.348781	0.073	0.64	0.0002097	CXCR4/THSD7B
rs12997562	Imp	2	137503882	G	A	0.522	0.8	0.000985232	0.519	1.087	0.51407	0.521	0.89	0.0303	CXCR4/THSD7B
rs10199067	Imp	2	139009726	C	T	0.741	1.3	0.000947713	0.734	1.017	0.612749	0.738	1.18	0.02345	HNMT/SPOPL
rs35845966	Imp	2	152205728	A	G	0.361	1.27	0.000368845	0.351	1.058	0.580705	0.358	1.19	0.001768	NMI/TNFAIP6
rs17494490	Geno	2	160125205	C	T	0.391	0.8	0.000944849	0.391	0.779	0.0184208	0.391	0.79	5.026e-05	WDSUB1
rs7589668	Geno	2	164477772	A	G	0.121	1.41	0.00060046	0.117	1.002	0.860616	0.12	1.26	0.005272	FIGN
rs72913554	Imp	2	175175381	A	C	0.086	0.53	6.98169e-05	0.093	1.014	0.730321	0.088	0.73	0.003838	OLA1/SP9
rs66733621	Imp	2	179664050	G	A	0.293	0.79	0.000781315	0.29	0.896	0.103447	0.292	0.83	0.0002719	TTN
rs62181982	Imp	2	180886902	C	G	0.193	0.71	0.000489629	0.186	0.952	0.343595	0.19	0.8	0.0009178	CWC22/UBE2E3
rs35308779	Imp	2	196188657	C	A	0.133	1.43	0.000260564	0.146	0.966	0.800944	0.137	1.24	0.007041	PCGEM1/SLC39A10
rs79239729	Imp	2	202787367	A	G	0.067	1.56	0.000607161	0.066	0.714	0.277431	0.067	1.24	0.04552	CDK15/FZD7
rs35629855	Imp	2	205039086	T	A	0.486	1.26	0.000688636	0.486	1.029	0.736748	0.486	1.17	0.01464	ICOS/PARD3B
rs849266	Imp	2	206275060	A	G	0.065	0.31	3.24272e-06	0.054	1.057	0.987603	0.061	0.54	0.0002668	PARD3B
rs13021171	Imp	2	206376358	A	G	0.075	1.51	0.000228053	0.084	0.913	0.855221	0.078	1.28	0.005692	PARD3B
rs7596783	Imp	2	209035224	A	G	0.083	1.64	1.93655e-05	0.089	1.022	0.508492	0.085	1.4	0.000177	C2orf80
rs17733579	Geno	2	210454751	A	G	0.286	1.32	5.82215e-05	0.311	1.061	0.902785	0.294	1.22	0.001299	MAP2
rs10194333	Imp	2	210715307	A	C	0.126	1.47	0.000236019	0.116	1.223	0.189489	0.123	1.38	0.000223	UNC80
rs1014450	Imp	2	214994793	C	T	0.343	1.33	0.000305057	0.337	0.936	0.824196	0.341	1.17	0.007322	SPAG16
rs16851548	Imp	2	215020829	C	A	0.132	1.46	0.000159939	0.155	0.932	0.587469	0.139	1.24	0.009054	SPAG16
rs12988015	Imp	2	216852250	G	T	0.338	0.74	0.000662747	0.34	0.775	0.00867768	0.339	0.75	1.723e-05	MREG
rs1519483	Imp	2	222521870	T	C	0.287	0.65	1.80471e-05	0.293	0.994	0.793784	0.289	0.77	0.000444	EPHA4/PAX3
rs35249564	Imp	2	222807672	A	C	0.106	1.39	0.000850189	0.1	1.299	0.167849	0.104	1.36	0.0005266	EPHA4/PAX3
rs11690054	Imp	2	228657853	A	G	0.621	0.74	2.24663e-05	0.614	0.982	0.421248	0.619	0.81	0.0001372	SLC19A3/CCL20
rs113000148	Imp	2	230719747	T	C	0.13	1.49	0.000109362	0.13	1.067	0.276606	0.13	1.33	0.0002145	TRIP12
rs4973574	Imp	2	233805058	T	C	0.335	0.75	0.000784842	0.342	1.023	0.825459	0.338	0.85	0.005767	NGEF
rs6739664	Imp	2	233833017	C	T	0.85	1.43	0.000981961	0.857	0.784	0.0933309	0.852	1.11	0.1269	NGEF
rs79555492	Imp	2	236120983	T	C	0.165	1.41	0.000308937	0.175	0.868	0.309654	0.168	1.19	0.02899	SH3BP4/AGAP1
rs13382236	Geno	2	238800874	C	T	0.072	1.61	1.9128e-05	0.081	0.917	0.519046	0.075	1.33	0.0001828	RAMP1
rs79730594	Imp	2	240126667	T	C	0.131	1.46	0.000293023	0.136	1.109	0.505321	0.132	1.33	0.001176	HDAC4
rs12623679	Imp	2	240126789	A	G	0.194	0.7	0.000309328	0.183	1.021	0.957334	0.19	0.82	0.004356	HDAC4
rs60946542	Imp	2	242680229	A	G	0.241	0.68	7.48835e-05	0.226	0.963	0.727032	0.237	0.77	0.0009286	D2HGDH
rs9839345	Imp	3	1175842	T	C	0.115	0.61	0.000122785	0.112	1.123	0.41406	0.114	0.79	0.01278	CNTN6
rs12715222	Imp	3	3417914	G	C	0.221	1.39	0.000397413	0.209	1.155	0.154531	0.217	1.3	0.0002567	CRBN/SUMF1
rs77386624	Imp	3	4234925	C	T	0.073	1.54	0.000554056	0.078	0.796	0.194914	0.074	1.23	0.05903	SUMF1
rs9840481	Imp	3	5497349	T	A	0.313	0.75	0.000832011	0.301	0.887	0.293531	0.309	0.8	0.00109	EDEM1/GRM7
rs113615875	Imp	3	9757477	A	T	0.051	0.5	0.000991108	0.047	0.954	0.607455	0.049	0.66	0.02436	CPNE9
rs9811934	Imp	3	11784639	T	C	0.245	1.39	0.000184052	0.229	1.187	0.318935	0.24	1.32	0.0003947	VGLL4/TAMM41
rs1432601	Geno	3	14731808	T	C	0.349	1.34	0.000543732	0.333	1.174	0.0594624	0.344	1.28	0.0001053	C3orf20
rs4685243	Imp	3	15317608	G	A	0.318	1.28	0.000262153	0.312	0.985	0.79103	0.316	1.17	0.007239	SH3BP5
rs4234541	Geno	3	17182697	C	T	0.414	0.77	0.000819193	0.406	0.935	0.402009	0.412	0.83	0.001707	PLCL2/TBC1D5
rs6765154	Imp	3	17205764	C	T	0.247	1.37	0.000553258	0.266	1.081	0.328344	0.253	1.26	0.0009399	TBC1D5
rs6771369	Imp	3	19424895	G	A	0.712	0.77	0.000304165	0.722	0.961	0.77653	0.715	0.83	0.002714	KCNH8
rs76900667	Imp	3	24172873	A	G	0.145	0.7	0.000705614	0.126	0.922	0.637805	0.139	0.78	0.003284	THRB
rs1599489	Imp	3	28681632	C	T	0.798	1.37	0.000890491	0.797	1.244	0.146728	0.798	1.32	0.0004622	ZCWPW2/RBMS3
rs977713	Imp	3	29029209	C	T	0.118	1.4	0.000148708	0.116	0.925	0.477583	0.117	1.22	0.01175	ZCWPW2/RBMS3
rs7646643	Imp	3	33046637	A	G	0.696	1.29	0.000324779	0.719	1.166	0.21014	0.703	1.24	0.0003303	GLB1
rs9863198	Geno	3	33070455	G	A	0.249	0.71	4.39744e-05	0.236	0.9	0.703623	0.245	0.78	0.0006063	GLB1
rs6763048	Geno	3	38681394	G	A	0.135	1.42	0.000385792	0.127	1.342	0.105624	0.133	1.4	0.0001549	SCN5A
rs62261638	Imp	3	39844963	G	A	0.309	0.75	0.000904204	0.301	1.063	0.707348	0.307	0.86	0.01838	MOBP/MYRIP
rs2276831	Imp	3	42569069	A	C	0.298	0.73	0.000540283	0.307	1.109	0.138713	0.301	0.87	0.07539	VIPR1
rs339710	Imp	3	42720050	T	A	0.623	1.38	0.000307131	0.637	1.089	0.330024	0.628	1.26	0.0006094	ZBTB47/KLHL40
rs1049667	Imp	3	46623690	A	C	0.356	0.78	0.00023244	0.337	0.895	0.336457	0.35	0.82	0.0005103	TDGF1
rs62263577	Imp	3	47884003	A	T	0.069	1.67	4.82165e-05	0.075	1.416	0.142903	0.071	1.58	4.327e-05	DHX30
rs28666851	Imp	3	54040034	T	C	0.056	1.5	0.000631187	0.064	0.576	0.0173688	0.059	1.13	0.2363	SELK/CACNA2D3
rs12374046	Imp	3	60502115	T	C	0.187	1.3	0.000603805	0.21	1.03	0.795668	0.194	1.2	0.0045	FHIT
rs73092217	Imp	3	62591297	G	C	0.163	1.55	6.2936e-05	0.153	0.795	0.366118	0.16	1.26	0.01043	CADPS
rs9859772	Imp	3	63445724	A	C	0.212	0.69	0.00016371	0.214	0.839	0.110112	0.213	0.74	8.087e-05	SYNPR
rs1576397	Imp	3	67583706	A	T	0.788	0.73	0.000178694	0.778	0.998	0.807419	0.784	0.82	0.005522	SUCLG2
rs75899003	Imp	3	68487284	A	C	0.14	0.69	0.000341825	0.128	1.038	0.456363	0.136	0.81	0.01968	FAM19A1
rs6804792	Imp	3	71758176	T	A	0.28	1.25	0.000966209	0.278	1.111	0.260859	0.279	1.2	0.001039	EIF4E3
rs75575092	Imp	3	71963599	G	A	0.063	1.52	0.000903318	0.068	1.111	0.934657	0.065	1.37	0.01104	PROK2/RYBP
rs35796547	Imp	3	74432399	G	A	0.469	0.76	0.000504133	0.468	1.033	0.726764	0.469	0.85	0.003332	CNTN3
rs73121908	Imp	3	78237666	A	C	0.059	1.52	0.000955536	0.063	0.779	0.4511	0.06	1.23	0.03488	ROBO2/ROBO1
rs28624341	Imp	3	81675255	A	G	0.187	1.38	0.000887488	0.191	0.771	0.0136349	0.188	1.13	0.2909	GBE1
rs11712238	Imp	3	82775843	T	G	0.119	1.42	0.000685896	0.119	1.488	0.00343837	0.119	1.45	7.51e-06	GBE1/CADM2
rs2949169	Imp	3	98889782	C	T	0.306	0.75	0.00080778	0.288	0.919	0.338453	0.3	0.81	0.001307	DCBLD2/COL8A1
rs2895341	Imp	3	107992160	A	G	0.088	1.5	8.6914e-05	0.091	1.037	0.762893	0.089	1.34	0.004014	IFT57/HHLA2
rs2603139	Imp	3	108229990	C	T	0.21	0.76	0.000922991	0.212	0.848	0.114799	0.211	0.79	0.0003536	MYH15
rs57404826	Imp	3	112068517	T	C	0.067	0.56	0.00073378	0.062	0.723	0.28878	0.065	0.62	0.0009673	CD200
rs6438259	Imp	3	115146861	T	C	0.706	0.77	0.000988778	0.707	0.915	0.722076	0.706	0.82	0.005193	ZBTB20/GAP43
rs2700371	Imp	3	123629829	A	G	0.05	1.64	0.000357831	0.052	1.007	0.200067	0.05	1.4	0.000333	CCDC14
rs10934657	Geno	3	123812836	C	T	0.777	0.73	0.000658651	0.763	1.255	0.196532	0.773	0.89	0.06371	KALRN
rs10934944	Imp	3	130209258	T	C	0.74	0.75	0.000870445	0.733	1.041	0.769664	0.737	0.85	0.01562	COL6A5/COL6A6
rs849146	Imp	3	132048614	C	T	0.621	0.76	0.000431978	0.634	0.935	0.76419	0.626	0.82	0.003318	ACPP
rs79803693	Imp	3	143227302	A	G	0.072	1.7	1.23175e-05	0.077	1.183	0.13703	0.073	1.49	1.403e-05	SLC9A9
rs9872790	Geno	3	143238874	T	G	0.5	1.27	0.000682453	0.484	1.12	0.0814887	0.495	1.21	0.0001834	SLC9A9
rs6797672	Imp	3	149245209	C	T	0.783	1.31	0.000715895	0.775	0.94	0.447362	0.781	1.14	0.03013	WWTR1
rs149227689	Imp	3	149268897	T	C	0.08	1.64	0.000100697	0.09	0.816	0.494566	0.083	1.3	0.009024	WWTR1
rs7611328	Imp	3	150974684	A	G	0.797	1.44	0.000346128	0.801	0.863	0.249944	0.798	1.18	0.03785	MED12L/P2RY14
rs2172250	Geno	3	151154666	C	T	0.836	1.47	0.000839824	0.834	0.983	0.968948	0.835	1.25	0.008472	MED12L/IGSF10
rs34403570	Imp	3	171063189	C	A	0.245	1.28	0.000638933	0.247	0.924	0.481803	0.246	1.14	0.02589	TNIK
rs73173487	Imp	3	175933454	C	A	0.217	1.41	9.10363e-06	0.219	1.059	0.632505	0.218	1.28	0.0001667	NAALADL2/TBL1XR1
rs7623074	Imp	3	176018338	T	G	0.727	1.43	0.000523083	0.727	1.087	0.107049	0.727	1.29	0.0002027	NAALADL2/TBL1XR1
rs7623404	Imp	3	179192161	A	G	0.355	1.32	0.000544305	0.359	0.917	0.380393	0.356	1.15	0.03129	GNB4/ACTL6A
rs114930418	Imp	3	184315073	T	G	0.107	1.71	5.78928e-05	0.1	0.917	0.417953	0.104	1.42	0.008407	EIF2B5
rs12495941	Imp	3	186568180	T	G	0.351	0.79	0.000597382	0.35	1.006	0.594847	0.351	0.87	0.01881	ADIPOQ
rs1474275	Imp	3	188099420	G	T	0.51	0.81	0.000594572	0.506	0.904	0.147494	0.508	0.84	0.0003348	LPP
rs492741	Imp	3	189897506	C	G	0.143	0.64	0.000212355	0.14	0.948	0.558769	0.142	0.76	0.01147	LEPREL1/CLDN1
rs57866025	Imp	3	189957369	T	C	0.268	0.73	0.00039372	0.285	0.958	0.861635	0.274	0.82	0.007823	LEPREL1/CLDN1
rs6765746	Imp	3	193626772	T	C	0.278	1.31	0.000606828	0.261	0.786	0.0179242	0.272	1.1	0.2301	OPA1/HES1
rs2676876	Imp	3	194754301	T	G	0.123	0.58	0.000307447	0.114	1.173	0.184004	0.12	0.8	0.04665	FAM43A/XXYLT1
rs62292087	Imp	3	194765190	C	G	0.069	0.46	0.000101603	0.07	0.876	0.536089	0.069	0.62	0.000621	FAM43A/XXYLT1
rs1684440	Imp	3	196378018	G	A	0.317	0.77	0.0009619	0.323	0.971	0.859677	0.319	0.84	0.01357	NRROS/PIGX
rs62294713	Imp	4	1057265	T	G	0.078	0.6	0.000537851	0.074	0.871	0.365211	0.077	0.7	0.00108	RNF212
rs13107495	Imp	4	1521741	G	C	0.718	0.75	0.000309216	0.729	0.943	0.732902	0.722	0.81	0.002438	NKX1-1/FAM53A
rs1263446	Geno	4	2816300	G	A	0.092	1.62	3.77638e-05	0.089	1.143	0.694367	0.091	1.44	0.000532	SH3BP2
rs2748776	Imp	4	3719918	T	C	0.836	1.48	0.00012301	0.835	0.855	0.413471	0.836	1.18	0.01282	LRPAP1/ADRA2C
rs4017772	Imp	4	5427961	A	G	0.059	1.59	0.000924564	0.058	0.972	0.211568	0.058	1.35	0.0007586	STK32B
rs6817324	Imp	4	7378397	T	C	0.683	0.79	0.000881897	0.676	1.012	0.957733	0.681	0.86	0.008518	SORCS2
rs13121226	Imp	4	8092507	G	C	0.64	0.77	0.000867005	0.633	0.927	0.673504	0.637	0.82	0.004176	ABLIM2
rs3096594	Imp	4	14165436	A	G	0.59	1.26	0.000592144	0.589	1.065	0.282263	0.589	1.18	0.0007947	BOD1L1/CPEB2
rs12500222	Imp	4	18970129	G	C	0.102	1.48	0.000933474	0.098	0.987	0.980416	0.101	1.3	0.009304	LCORL/SLIT2
rs62301618	Imp	4	22168046	A	C	0.181	0.69	0.000311315	0.196	0.762	0.0189154	0.186	0.72	1.852e-05	KCNIP4/GPR125
rs76911201	Imp	4	22246474	C	T	0.11	0.59	0.000168725	0.107	1.433	0.0362072	0.109	0.89	0.103	KCNIP4/GPR125
rs2324241	Imp	4	23955518	C	A	0.387	0.77	0.000665694	0.41	1.142	0.282613	0.394	0.9	0.04687	PPARGC1A/DHX15
rs12509003	Imp	4	24628744	A	G	0.315	1.35	0.00022155	0.32	0.876	0.201189	0.317	1.15	0.03692	DHX15/SOD3
rs11721816	Imp	4	25730572	T	C	0.45	1.33	5.79811e-05	0.447	1.061	0.201268	0.449	1.22	8.193e-05	SLC34A2/SEL1L3
rs7668273	Geno	4	27172128	G	A	0.344	1.33	3.57249e-05	0.335	0.869	0.212495	0.341	1.14	0.01428	STIM2
rs6858326	Imp	4	29346687	T	C	0.636	1.37	0.000233206	0.654	1.096	0.333916	0.642	1.26	0.0005055	STIM2/PCDH7
rs7676875	Imp	4	36356672	C	T	0.592	0.76	0.000242545	0.584	1.104	0.401047	0.589	0.87	0.01916	DTHD1/KIAA1239
rs12649548	Imp	4	37964702	G	T	0.196	1.36	0.000573204	0.207	0.936	0.30481	0.199	1.19	0.04043	TBC1D1
rs11725783	Imp	4	38906951	T	C	0.186	0.74	0.000727733	0.177	0.846	0.558596	0.184	0.77	0.00266	FAM114A1
rs190543769	Imp	4	41492932	T	C	0.067	1.58	0.00068012	0.062	1.091	0.613307	0.065	1.4	0.002985	LIMCH1
rs2575523	Imp	4	42712807	T	A	0.775	0.73	0.000115392	0.77	0.853	0.154637	0.773	0.77	9.601e-05	ATP8A1/GRXCR1
rs28407462	Imp	4	44369435	T	C	0.127	0.67	0.000493396	0.125	1.115	0.441903	0.126	0.82	0.025	KCTD8
rs6844327	Imp	4	45012567	T	A	0.235	0.71	0.000478604	0.241	0.801	0.0603078	0.237	0.74	9.582e-05	GNPDA2/GABRG1
rs7681149	Imp	4	47519022	G	A	0.514	1.32	0.000803734	0.498	0.968	0.536634	0.509	1.18	0.02561	ATP10D
rs148359314	Imp	4	49082267	C	G	0.075	1.76	0.000331338	0.071	1.503	0.0377896	0.074	1.65	4.119e-05	CWH43
rs12650391	Imp	4	62813643	C	T	0.234	0.73	0.000741135	0.217	1.117	0.114645	0.229	0.86	0.09889	LPHN3
rs72911389	Imp	4	67989882	T	G	0.05	1.89	0.00010447	0.042	1.303	0.303356	0.047	1.7	0.0002394	EPHA5/CENPC
rs28522618	Imp	4	69034353	G	A	0.206	1.47	1.51352e-05	0.198	1.01	0.578247	0.203	1.29	0.000194	SYT14L/TMPRSS11BNL
rs7669495	Imp	4	69050299	T	A	0.213	0.68	5.67601e-05	0.217	0.911	0.393769	0.214	0.77	0.0002359	SYT14L/TMPRSS11BNL
rs77547747	Imp	4	75682041	C	T	0.05	1.75	0.000697581	0.047	0.975	0.979311	0.049	1.47	0.008484	BTC
rs13134119	Imp	4	77009175	A	G	0.285	1.27	0.000543353	0.283	1.067	0.563767	0.284	1.19	0.0022	ART3
rs6848493	Imp	4	77693956	C	G	0.09	1.47	0.0004435	0.087	0.728	0.00958348	0.089	1.19	0.26	SHROOM3
rs35443822	Imp	4	83311591	A	G	0.163	0.62	7.07347e-05	0.16	0.895	0.307715	0.162	0.72	0.0001834	HNRNPD/HNRNPDL
rs4693634	Imp	4	84525707	G	A	0.05	0.54	0.00098489	0.048	1.439	0.400333	0.049	0.85	0.04052	AGPAT9
rs35753490	Imp	4	84967420	C	T	0.589	0.8	0.000739262	0.571	0.987	0.825231	0.583	0.86	0.005541	AGPAT9/NKX6-1
rs5024097	Imp	4	88871282	G	C	0.456	1.23	0.000916747	0.464	0.951	0.544427	0.459	1.12	0.02705	MEPE/SPP1
rs1795736	Imp	4	89932273	A	G	0.414	0.8	0.000114091	0.4	1.102	0.319907	0.409	0.9	0.01672	FAM13A
rs280096	Imp	4	94939552	C	A	0.486	1.38	2.50031e-05	0.495	1.12	0.127527	0.489	1.28	2.198e-05	ATOH1/SMARCAD1
rs265062	Imp	4	96369670	G	A	0.656	0.76	0.000181522	0.66	0.853	0.213165	0.657	0.79	0.0002145	UNC5C
rs28829087	Imp	4	98405989	G	A	0.081	0.54	0.000710984	0.082	1.035	0.769031	0.081	0.73	0.01386	STPG2
rs10032456	Imp	4	101741569	A	G	0.198	1.36	0.000765483	0.195	0.9	0.47579	0.197	1.18	0.02902	EMCN
rs6839983	Imp	4	108232014	G	A	0.111	0.57	0.000150066	0.106	1.248	0.111108	0.109	0.8	0.04926	DKK2/PAPSS1
rs72900303	Imp	4	109113323	C	A	0.091	1.48	0.000858467	0.089	0.949	0.440941	0.09	1.29	0.0338	LEF1/RPL34
rs1470716	Geno	4	112524605	G	A	0.188	0.69	0.000218938	0.198	1.124	0.446377	0.191	0.85	0.01588	PITX2/C4orf32
rs74789170	Imp	4	114557190	C	T	0.132	0.68	0.000921046	0.156	0.897	0.536149	0.14	0.77	0.002934	CAMK2D
rs11098486	Imp	4	120066810	A	G	0.459	0.83	0.00089034	0.433	0.986	0.372944	0.45	0.88	0.001622	MYOZ2
rs114314198	Imp	4	120245180	G	A	0.059	1.7	0.000387473	0.062	0.778	0.34356	0.06	1.33	0.02923	FABP2/PDE5A
rs10033707	Imp	4	121708442	G	T	0.335	1.41	0.00014138	0.35	1.116	0.298521	0.34	1.29	0.0002925	PRDM5
rs6534307	Imp	4	122573556	T	G	0.868	1.6	0.000193782	0.855	1.064	0.780058	0.864	1.34	0.002032	QRFPR/ANXA5
rs60133174	Imp	4	124353663	C	T	0.091	1.5	0.000678699	0.096	0.993	0.868874	0.093	1.3	0.005828	SPRY1/ANKRD50
rs6827806	Imp	4	126592250	T	C	0.056	1.74	0.000195636	0.05	1.238	0.677299	0.054	1.58	0.001529	FAT4/INTU
rs62317872	Imp	4	129743454	A	G	0.148	0.64	0.000513256	0.145	0.999	0.985441	0.147	0.77	0.006435	JADE1
rs77047910	Imp	4	139258803	C	T	0.073	1.6	0.000324809	0.076	1.302	0.179917	0.074	1.49	0.0002672	SLC7A11/CCRN4L
rs7657816	Imp	4	146643123	C	T	0.411	1.32	0.00099917	0.403	1.155	0.0304539	0.408	1.26	8.792e-05	C4orf51
rs17809246	Geno	4	146946713	C	T	0.162	1.35	0.000532828	0.158	0.933	0.514818	0.161	1.18	0.001857	ZNF827/LSM6
rs559072	Geno	4	149734385	G	A	0.07	1.53	0.000827038	0.077	1.247	0.306512	0.072	1.42	0.001153	NR3C2/DCLK2
rs113049184	Imp	4	162315548	T	C	0.254	0.71	6.71021e-05	0.268	1.018	0.894466	0.259	0.82	0.001391	FSTL5
rs62352253	Imp	4	166067248	G	C	0.133	1.39	0.000929636	0.137	1.182	0.298128	0.134	1.31	0.001213	TMEM192
rs1021318	Geno	4	169340639	A	C	0.449	1.24	0.000781848	0.452	1.004	0.761693	0.45	1.15	0.01491	DDX60L
rs111433788	Imp	4	170993994	G	C	0.092	1.4	0.000617081	0.095	1	0.722191	0.093	1.25	0.003774	AADAT
rs6826970	Imp	4	172054686	C	T	0.065	0.47	8.7851e-05	0.067	1.107	0.948807	0.065	0.7	0.0025	AADAT/GALNTL6
rs1394856	Imp	4	172974435	T	A	0.912	0.58	1.95836e-05	0.908	0.763	0.128887	0.91	0.64	1.843e-05	GALNTL6
rs73011740	Imp	4	182486160	G	A	0.076	0.58	0.000514054	0.076	1.328	0.182229	0.076	0.85	0.06009	TENM3
rs116801220	Imp	4	182547839	T	A	0.052	1.74	0.000684336	0.043	0.728	0.448889	0.049	1.37	0.02929	TENM3
rs4862729	Imp	4	187668040	G	A	0.595	0.77	0.000949725	0.586	0.871	0.315437	0.592	0.8	0.001335	FAT1/ZFP42
rs7666835	Imp	4	188229222	G	A	0.346	0.75	0.00058418	0.344	0.991	0.714707	0.345	0.84	0.003564	FAT1/ZFP42
rs28456377	Imp	4	190512695	G	A	0.313	1.48	0.000623958	0.328	0.942	0.637487	0.318	1.24	0.01741	TRIML1/FRG1
rs6870326	Imp	5	2636855	T	C	0.547	1.28	0.00071232	0.532	1.054	0.73495	0.543	1.19	0.0043	IRX4/IRX2
rs56040027	Imp	5	2648961	A	G	0.089	0.62	0.000754782	0.083	1.054	0.886316	0.087	0.77	0.01102	IRX4/IRX2
rs6872996	Geno	5	6667102	T	C	0.259	0.72	0.000129556	0.265	0.816	0.184168	0.261	0.75	0.0001341	SRD5A1
rs903849	Imp	5	7076125	T	G	0.515	1.27	0.000415	0.514	1.009	0.832988	0.515	1.16	0.003862	PAPD7/ADCY2
rs7728117	Imp	5	8509328	C	G	0.497	0.78	0.000804574	0.492	0.941	0.984835	0.495	0.84	0.00855	MIR4458HG/SEMA5A
rs2619915	Imp	5	9161347	A	G	0.678	0.7	0.000249626	0.674	0.866	0.273243	0.677	0.75	0.0003926	SEMA5A
rs835149	Geno	5	14881102	A	G	0.939	0.67	0.000749544	0.933	0.875	0.601812	0.937	0.73	0.003089	ANKH/FBXL7
rs10805781	Imp	5	25590931	A	T	0.248	1.43	4.10095e-05	0.24	0.889	0.339614	0.245	1.21	0.009117	CDH10/CDH9
rs13167720	Geno	5	26862104	C	T	0.332	1.31	0.000277235	0.324	1.033	0.688929	0.33	1.2	0.002003	CDH10/CDH9
rs113829457	Imp	5	27120060	C	T	0.157	0.58	2.64378e-05	0.146	0.797	0.17624	0.154	0.66	3.679e-05	CDH9
rs650118	Imp	5	39293111	C	T	0.092	1.59	0.000352998	0.097	1.036	0.686866	0.094	1.36	0.002346	C9
rs181141	Imp	5	40209676	T	C	0.054	1.55	0.000549586	0.059	1.392	0.0405855	0.055	1.49	6.962e-05	DAB2/PTGER4
rs11750374	Imp	5	50223075	C	A	0.067	1.65	5.83295e-05	0.075	1.179	0.368842	0.07	1.46	0.000215	PARP8/ISL1
rs76669289	Imp	5	59363516	A	G	0.066	1.65	0.000132799	0.074	0.866	0.544662	0.069	1.33	0.009147	PDE4D
rs13185666	Imp	5	62212416	C	T	0.088	0.59	0.000914682	0.081	0.756	0.239785	0.086	0.65	0.0008881	LRRC70/HTR1A
rs73119301	Imp	5	68442164	A	G	0.147	1.47	0.00016134	0.147	1.188	0.169127	0.147	1.36	0.0001415	SLC30A5/CCNB1
rs10037320	Imp	5	76413970	G	C	0.264	1.44	6.33881e-05	0.272	0.968	0.660227	0.267	1.25	0.004375	ZBED3/PDE8B
rs146638672	Imp	5	90017092	T	C	0.05	1.64	0.000675158	0.052	0.803	0.242955	0.051	1.33	0.05407	GPR98
rs17426936	Imp	5	94538849	C	T	0.052	1.7	0.000247113	0.046	1.188	0.583574	0.05	1.53	0.00135	MCTP1
rs17082260	Imp	5	97312439	G	A	0.098	1.42	0.000335902	0.1	0.993	0.968266	0.098	1.26	0.005501	RIOK2/RGMB
rs4635922	Imp	5	106394060	G	A	0.327	0.75	0.000175205	0.317	1.011	0.802589	0.324	0.84	0.002021	EFNA5
rs10519387	Imp	5	113832780	T	C	0.2	0.64	1.20729e-05	0.21	1.171	0.878132	0.203	0.82	0.0004413	KCNN2/TRIM36
rs59159369	Imp	5	125344924	G	T	0.061	1.5	0.00099339	0.057	1.419	0.366191	0.06	1.47	0.001713	ZNF608/GRAMD3
rs72785027	Imp	5	128661320	A	C	0.05	1.58	0.000880247	0.061	1.108	0.632941	0.054	1.38	0.003775	ISOC1/ADAMTS19
rs2074369	Imp	5	131973663	C	T	0.258	1.57	5.8127e-10	0.286	1.31	0.035617	0.267	1.47	7.684e-10	RAD50
rs11949166	Imp	5	132027681	T	A	0.719	0.6	1.15931e-13	0.696	0.694	3.00057e-05	0.712	0.63	4.362e-17	IL4/KIF3A
rs62379405	Imp	5	141132170	G	T	0.271	0.72	0.000490167	0.272	1.156	0.414218	0.271	0.87	0.02689	ARAP3/PCDH1
rs54892	Imp	5	141143296	T	C	0.656	0.76	0.000221211	0.657	1.032	0.954879	0.656	0.85	0.003497	ARAP3/PCDH1
rs76031156	Imp	5	147182755	C	G	0.052	0.52	0.000747828	0.06	1.002	0.992186	0.054	0.72	0.008302	JAKMIP2/SPINK1
rs2910097	Imp	5	147970484	T	C	0.361	1.25	0.000388708	0.374	0.842	0.0904377	0.366	1.08	0.08654	HTR4
rs6579751	Imp	5	149042037	C	T	0.691	1.34	8.78509e-05	0.698	0.98	0.70373	0.693	1.18	0.0009638	ARHGEF37/PPARGC1B
rs56704356	Imp	5	149093203	G	A	0.09	1.64	2.5555e-05	0.094	0.942	0.924436	0.091	1.37	0.001242	ARHGEF37/PPARGC1B
rs381258	Imp	5	156174011	A	G	0.911	0.63	0.0001661	0.907	1.267	0.333157	0.91	0.78	0.01943	SGCD
rs9637860	Imp	5	158512626	T	G	0.364	0.69	3.57461e-05	0.349	0.979	0.707079	0.359	0.79	0.0005337	EBF1
rs7726095	Imp	5	159336686	A	G	0.06	1.68	5.17312e-05	0.056	0.797	0.427587	0.059	1.35	0.007669	IL12B/ADRA1B
rs17501698	Geno	5	160375241	C	T	0.123	1.47	0.000189063	0.136	1.004	0.49378	0.127	1.29	0.01282	ATP10B/GABRB2
rs59143431	Imp	5	162833822	T	C	0.1	1.57	3.07068e-05	0.102	1.346	0.222419	0.101	1.49	5.879e-05	GABRG2/CCNG1
rs989521	Geno	5	163339463	T	C	0.824	0.72	0.000606018	0.838	1.184	0.413066	0.829	0.84	0.03021	MAT2B
rs2961863	Geno	5	165914041	C	T	0.865	0.68	0.000134574	0.862	0.936	0.800217	0.864	0.76	0.001688	MAT2B/TENM2
rs2101881	Imp	5	174897031	C	A	0.171	1.38	0.000334214	0.161	1.111	0.421013	0.168	1.28	0.0009517	DRD1/SFXN1
rs13185628	Imp	5	178894825	T	C	0.095	1.53	0.000896392	0.094	1.243	0.114133	0.095	1.42	0.0003427	ADAMTS2/RUFY1
rs7708552	Imp	5	180195645	A	G	0.343	0.75	0.000207927	0.329	0.954	0.594389	0.338	0.82	0.001239	OR2Y1/MGAT1
rs114975303	Imp	6	2827609	G	T	0.055	1.72	0.000541345	0.054	1.199	0.858038	0.055	1.53	0.004895	WRNIP1/SERPINB1
rs12190408	Imp	6	3881650	T	G	0.088	0.51	0.000117892	0.086	0.969	0.338799	0.088	0.67	0.01594	FAM50B/PRPF4B
rs9503801	Imp	6	3915397	G	A	0.433	0.75	4.02511e-05	0.43	0.92	0.404228	0.432	0.81	0.000193	FAM50B/PRPF4B
rs9405943	Imp	6	6580752	G	A	0.419	0.76	0.000163263	0.427	1.031	0.437999	0.422	0.85	0.01388	F13A1/LY86
rs686291	Imp	6	10472041	G	C	0.358	0.78	0.000544123	0.352	1.073	0.381171	0.356	0.88	0.03122	TFAP2A/GCNT2
rs6456564	Imp	6	10596620	A	G	0.55	0.81	0.000897146	0.545	0.872	0.13678	0.548	0.83	0.0004266	GCNT2
rs1579135	Imp	6	13108053	G	C	0.421	0.74	6.89735e-05	0.405	1.18	0.0798941	0.416	0.89	0.04389	PHACTR1
rs72832642	Imp	6	19353117	A	G	0.086	1.61	0.000405425	0.083	0.947	0.580218	0.085	1.35	0.001885	RNF144B/ID4
rs114735690	Imp	6	19666971	A	G	0.054	1.97	1.09447e-05	0.057	1.199	0.521742	0.055	1.68	0.0001255	RNF144B/ID4
rs10498705	Geno	6	22150358	A	G	0.145	0.69	0.000520942	0.155	0.872	0.318825	0.148	0.76	0.0008601	CASC15
rs12529002	Imp	6	23344815	T	C	0.107	1.48	0.000594569	0.109	0.944	0.983153	0.108	1.26	0.007027	HDGFL1/NRSN1
rs41556617	Imp	6	31237786	T	A	0.618	0.74	0.000224616	0.597	0.882	0.351291	0.611	0.79	0.0005323	HLA-C
rs9264628	Imp	6	31237971	T	C	0.228	0.72	0.000451387	0.187	1.082	0.757508	0.215	0.83	0.01085	HLA-C
rs12207915	Geno	6	32777752	C	T	0.079	0.56	2.19468e-05	0.079	0.781	0.257701	0.079	0.65	5.775e-05	HLA-DQB2/HLA-DOB
rs181997	Geno	6	32900718	A	G	0.328	1.32	2.61082e-05	0.316	0.957	0.550815	0.324	1.18	0.00359	TAP1/HLA-DMB
rs9357301	Imp	6	39212618	T	C	0.596	0.78	0.000982391	0.58	0.921	0.71555	0.591	0.83	0.005084	KCNK5/KCNK17
rs6921481	Imp	6	45985348	T	C	0.152	0.72	0.000654161	0.154	0.9	0.606748	0.152	0.79	0.00285	CLIC5
rs6459034	Imp	6	54748681	T	C	0.499	1.26	0.000676739	0.512	0.893	0.160489	0.503	1.11	0.07531	FAM83B
rs13220111	Imp	6	69165789	T	G	0.084	1.56	0.000665313	0.085	0.713	0.104953	0.084	1.23	0.09973	EYS/BAI3
rs9294130	Geno	6	79861169	A	G	0.331	0.76	0.000623309	0.328	0.963	0.599804	0.33	0.83	0.0027	PHIP/HMGN3
rs17786870	Imp	6	79953066	A	G	0.099	1.43	0.000734532	0.089	1.145	0.697994	0.095	1.34	0.003982	HMGN3/LCA5
rs770898	Geno	6	83065888	A	G	0.615	1.28	0.00056584	0.638	1.132	0.25988	0.622	1.23	0.0006829	IBTK/TPBG
rs285642	Imp	6	91021437	C	T	0.86	0.71	0.000770786	0.868	1.237	0.0732835	0.863	0.85	0.1314	BACH2/MAP3K7
rs12526103	Imp	6	92228771	G	T	0.083	0.52	0.000272863	0.081	1.333	0.0563808	0.082	0.81	0.0986	MAP3K7/CASC6
rs164290	Geno	6	94023695	C	T	0.314	0.73	0.000569852	0.314	1.047	0.730103	0.314	0.84	0.01329	EPHA7
rs164529	Imp	6	94045382	A	T	0.061	0.54	0.000841675	0.063	0.809	0.443751	0.061	0.65	0.002028	EPHA7
rs9363188	Imp	6	95072132	C	T	0.291	1.31	0.000146483	0.296	1.003	0.631011	0.292	1.19	0.007678	EPHA7/MANEA
rs2782893	Imp	6	102504598	C	G	0.486	1.35	0.000171682	0.475	1.033	0.913971	0.483	1.22	0.002679	GRIK2
rs7764742	Imp	6	116407559	G	T	0.113	0.59	0.000138615	0.115	0.775	0.240609	0.113	0.66	0.0002079	FRK/NT5DC1
rs783191	Imp	6	117576121	G	A	0.177	0.7	0.000144646	0.184	0.802	0.149231	0.18	0.74	0.0001094	RFX6/VGLL2
rs9374919	Imp	6	120804182	C	T	0.629	0.8	0.000851185	0.613	1.041	0.798413	0.624	0.88	0.01445	MAN1A1/TBC1D32
rs2039681	Imp	6	130302682	C	T	0.612	0.78	0.000530694	0.597	0.824	0.0963681	0.607	0.79	0.0001807	TMEM244/L3MBTL3
rs11961521	Imp	6	131377176	A	C	0.146	1.37	0.000176845	0.163	0.877	0.412903	0.152	1.17	0.01561	EPB41L2
rs9402643	Imp	6	135077240	A	G	0.256	1.36	0.000814876	0.269	1.037	0.613227	0.26	1.23	0.02149	SGK1/ALDH8A1
rs2506844	Imp	6	138350160	C	A	0.788	0.76	0.000861661	0.804	0.945	0.819208	0.793	0.82	0.006042	TNFAIP3/PERP
rs4457184	Imp	6	149444945	A	G	0.919	2.07	4.00174e-05	0.917	1.068	0.544486	0.918	1.53	0.0003349	UST/TAB2
rs4897128	Imp	6	149813362	A	C	0.176	1.38	1.59196e-05	0.167	1.135	0.173755	0.173	1.29	2.44e-05	ZC3H12D/PPIL4
rs9322316	Imp	6	151633806	T	A	0.482	1.29	0.000511612	0.492	1.123	0.679758	0.485	1.23	0.002961	AKAP12
rs317074	Imp	6	153530382	C	G	0.913	1.79	0.000300466	0.914	1.313	0.455894	0.913	1.57	0.001005	RGS17/OPRM1
rs11964047	Imp	6	154048345	T	G	0.293	1.33	0.000476398	0.279	0.946	0.861435	0.288	1.18	0.008794	RGS17/OPRM1
rs7761161	Geno	6	156121031	T	C	0.921	0.69	0.000145198	0.915	0.881	0.307574	0.919	0.75	0.0003126	NOX3/ARID1B
rs4368825	Imp	6	156295090	A	G	0.648	1.38	0.000197655	0.65	1.079	0.900956	0.648	1.26	0.002836	NOX3/ARID1B
rs7747406	Imp	6	164662856	G	A	0.782	0.76	0.00061451	0.787	1.066	0.5808	0.783	0.85	0.01978	QKI/C6orf118
rs140491395	Imp	6	167111073	A	T	0.085	1.69	0.00012401	0.084	0.893	0.476973	0.085	1.38	0.01065	RPS6KA2
rs9457297	Imp	6	167724926	G	T	0.347	0.77	0.000755948	0.341	0.935	0.327595	0.345	0.83	0.001185	UNC93A
rs57982666	Imp	7	185861	T	C	0.309	0.68	3.18204e-06	0.314	1.213	0.0402352	0.311	0.86	0.01837	FAM20C
rs113052242	Imp	7	4427088	A	G	0.097	0.56	0.00088985	0.093	1.092	0.961013	0.096	0.74	0.008632	SDK1/FOXK1
rs7811522	Imp	7	6861054	G	A	0.163	1.53	6.41335e-05	0.167	1.026	0.55387	0.164	1.33	0.0004799	CCZ1B
rs113177355	Imp	7	7803230	C	G	0.083	0.58	0.000614061	0.087	1.013	0.707977	0.084	0.75	0.01462	RPA3/GLCCI1
rs79539048	Imp	7	15345085	G	T	0.078	1.46	0.000673111	0.078	0.882	0.631512	0.078	1.25	0.01845	AGMO
rs10278793	Imp	7	17550570	C	G	0.164	0.59	5.68691e-06	0.175	0.926	0.412064	0.167	0.72	4.979e-05	AHR/SNX13
rs77132554	Imp	7	18860540	G	A	0.099	1.42	0.000759055	0.095	1.229	0.885915	0.097	1.36	0.006532	HDAC9
rs2390314	Imp	7	20455978	T	A	0.926	0.65	0.000397793	0.922	0.665	0.0733382	0.925	0.66	0.0001026	ITGB8/ABCB5
rs4721986	Geno	7	21197888	C	T	0.479	0.78	0.000731056	0.484	0.964	0.600348	0.481	0.85	0.003023	SP8/SP4
rs34853751	Imp	7	25809045	A	G	0.133	1.41	0.000673766	0.134	0.787	0.122747	0.134	1.16	0.09062	NPVF/NFE2L3
rs2699802	Imp	7	26428876	C	T	0.203	1.29	0.000513275	0.208	0.928	0.637368	0.205	1.15	0.01556	SNX10/KIAA0087
rs763809	Geno	7	28891257	C	T	0.684	0.78	0.000879153	0.674	1.104	0.114931	0.68	0.88	0.1065	CREB5/TRIL
rs6966495	Geno	7	29388867	G	A	0.219	0.71	0.000659937	0.229	0.892	0.260138	0.222	0.78	0.0007701	CHN2
rs27333	Imp	7	31703525	C	T	0.145	0.61	2.35711e-05	0.154	1.036	0.615912	0.148	0.76	0.0002994	CCDC129/PPP1R17
rs1860224	Geno	7	32255642	G	A	0.722	1.46	3.22626e-05	0.721	1.052	0.419665	0.722	1.28	0.0001762	PDE1C
rs12532988	Geno	7	35371417	G	T	0.333	1.23	0.000607517	0.346	0.892	0.566195	0.337	1.09	0.02036	TBX20/HERPUD2
rs10247773	Imp	7	38633255	C	G	0.836	0.75	0.000869315	0.834	1.075	0.910453	0.836	0.85	0.01139	AMPH
rs114254988	Imp	7	42206604	T	C	0.053	1.55	0.000934485	0.053	1.148	0.665168	0.053	1.41	0.004299	GLI3
rs2304316	Imp	7	43600227	A	G	0.462	0.77	8.36605e-05	0.449	0.988	0.701031	0.458	0.85	0.0009252	HECW1
rs73105869	Imp	7	45052498	C	T	0.135	0.63	7.45264e-05	0.131	0.83	0.174397	0.134	0.71	8.07e-05	CCM2
rs73093043	Imp	7	47763192	T	C	0.124	1.38	0.000246897	0.117	0.852	0.369642	0.122	1.19	0.02128	HUS1
rs75126749	Imp	7	50245372	A	T	0.068	0.51	0.000737635	0.065	1.259	0.332299	0.067	0.78	0.04225	C7orf72/IKZF1
rs2965588	Imp	7	52893947	A	T	0.258	1.32	0.000480273	0.27	1.058	0.989586	0.262	1.22	0.00623	COBL/POM121L12
rs10250065	Imp	7	56214680	C	G	0.619	0.77	0.000211464	0.625	1.01	0.590067	0.621	0.85	0.001237	NUPR1L/ZNF479
rs62459723	Imp	7	56978832	C	A	0.277	0.67	0.000169386	0.264	0.939	0.585371	0.273	0.76	0.001045	NUPR1L/ZNF479
rs4717205	Imp	7	64169019	A	G	0.927	0.69	0.000563326	0.92	1.153	0.73499	0.925	0.82	0.01305	ZNF107
rs4719194	Imp	7	71404472	C	T	0.07	1.48	0.00056512	0.08	0.87	0.836814	0.073	1.22	0.01033	CALN1
rs117121870	Imp	7	77986000	A	G	0.06	1.69	0.000298834	0.076	1.039	0.975218	0.065	1.42	0.004453	MAGI2
rs740210	Geno	7	80587737	G	A	0.717	1.43	9.35546e-05	0.739	0.92	0.250268	0.724	1.19	0.01961	SEMA3C/HGF
rs2051791	Imp	7	82444738	C	T	0.439	0.8	0.000664123	0.457	1.1	0.289086	0.445	0.9	0.04583	PCLO
rs62475804	Imp	7	83442869	C	T	0.173	0.74	0.000904589	0.179	1.416	0.0023458	0.175	0.98	0.4887	SEMA3E/SEMA3A
rs2106941	Imp	7	88741289	A	G	0.568	1.29	0.000511066	0.555	1.004	0.84327	0.564	1.18	0.004544	ZNF804B
rs6948168	Imp	7	89011499	C	T	0.727	0.74	0.000185185	0.728	1.027	0.997928	0.727	0.83	0.003481	C7orf62/STEAP1
rs10250915	Geno	7	90922544	T	C	0.301	1.35	0.000859392	0.303	0.875	0.195379	0.301	1.16	0.07267	FZD1/MTERF
rs2237587	Imp	7	95621361	A	G	0.286	0.74	0.000102696	0.284	0.98	0.734814	0.285	0.83	0.001173	DYNC1I1
rs12705391	Imp	7	106415156	G	A	0.447	0.74	0.000428115	0.459	0.956	0.360663	0.451	0.82	0.000894	CCDC71L/PIK3CG
rs1269641	Imp	7	107886930	C	T	0.456	1.28	0.00048098	0.464	1.007	0.776188	0.459	1.17	0.01079	NRCAM
rs820930	Geno	7	109308566	A	G	0.711	1.34	0.000185098	0.708	0.99	0.707323	0.71	1.19	0.007237	C7orf66/IMMP2L
rs6980230	Imp	7	110411171	T	A	0.573	0.75	1.64779e-05	0.571	1.158	0.372976	0.572	0.88	0.004975	IMMP2L
rs4731103	Imp	7	122990145	A	C	0.326	1.25	0.000729166	0.329	1.086	0.531263	0.327	1.19	0.002447	SLC13A1/IQUB
rs10231717	Geno	7	123218522	C	A	0.359	0.74	7.14961e-05	0.373	0.942	0.377298	0.363	0.81	0.000259	ASB15
rs74558393	Imp	7	130967476	G	A	0.09	0.53	0.000524703	0.088	0.738	0.0681583	0.089	0.61	0.0001193	MKLN1
rs10240355	Imp	7	131939639	C	T	0.261	1.31	0.00081296	0.265	0.96	0.762895	0.262	1.18	0.01522	PLXNA4
rs6951796	Imp	7	140961899	C	A	0.854	0.74	0.000635335	0.839	1.017	0.877788	0.849	0.83	0.005704	TMEM178B
rs11769467	Imp	7	148317447	T	A	0.055	1.63	0.000809587	0.064	1.363	0.16016	0.058	1.52	0.0004771	C7orf33/CUL1
rs12538823	Geno	7	150912750	T	G	0.094	1.44	0.000253107	0.111	0.882	0.466607	0.1	1.22	0.01624	ABCF2
rs138473118	Imp	7	157426443	C	G	0.05	1.69	0.000648003	0.048	1.025	0.992861	0.05	1.44	0.007592	PTPRN2
rs7795039	Imp	7	157443475	G	C	0.293	0.76	0.000239197	0.287	1.071	0.506836	0.291	0.87	0.01409	PTPRN2
rs11776625	Imp	8	4602067	A	G	0.092	1.54	0.000375232	0.084	0.839	0.541673	0.089	1.27	0.01652	CSMD1
rs9314544	Imp	8	4683497	A	T	0.079	1.57	3.0729e-06	0.081	0.69	0.0883543	0.08	1.25	0.009866	CSMD1
rs56303515	Imp	8	6722847	G	A	0.219	1.33	0.00029088	0.231	1.256	0.0413509	0.223	1.3	4.062e-05	XKR5/DEFB1
rs543631	Imp	8	15049847	C	T	0.058	1.58	0.000756936	0.065	1.075	0.662949	0.061	1.37	0.01834	SGCZ
rs112372260	Imp	8	17493644	T	A	0.057	1.71	6.96613e-06	0.059	1.127	0.5344	0.058	1.49	9.667e-05	PDGFRL
rs34266755	Imp	8	19900474	T	C	0.122	0.65	0.000346278	0.115	0.847	0.326898	0.119	0.72	0.000657	LPL/SLC18A1
rs34035110	Imp	8	20519721	G	C	0.334	1.33	0.000784849	0.338	1.044	0.228822	0.336	1.22	0.0007397	LZTS1/GFRA2
rs13277146	Imp	8	22334905	G	A	0.892	0.68	0.000446111	0.895	1.116	0.854654	0.893	0.79	0.008583	PPP3CC
rs10090993	Imp	8	22430380	T	A	0.219	1.34	0.00080159	0.214	1.272	0.0796254	0.217	1.31	0.0002049	SORBS3
rs7006739	Imp	8	29006707	G	T	0.44	1.36	5.72314e-05	0.427	1.1	0.449016	0.436	1.26	0.0002994	KIF13B
rs7838546	Geno	8	31947880	A	G	0.061	0.54	0.000633485	0.067	1.011	0.459937	0.063	0.73	0.02728	NRG1/NRG1-IT1
rs34139730	Imp	8	35534899	A	G	0.075	0.45	0.0005515	0.072	0.914	0.512548	0.074	0.62	0.001889	UNC5D
rs7835066	Imp	8	49344415	T	C	0.117	1.49	0.000828247	0.123	1.015	0.551118	0.119	1.32	0.02514	UBE2V2/EFCAB1
rs72637491	Imp	8	53784240	G	A	0.068	1.62	0.000548853	0.06	1.273	0.343533	0.066	1.51	0.0009994	RB1CC1/NPBWR1
rs4386955	Geno	8	57035027	A	G	0.099	1.49	8.04875e-05	0.109	1.061	0.885206	0.102	1.33	0.001524	MOS/PLAG1
rs10099734	Geno	8	58779457	C	T	0.296	1.3	0.000680479	0.3	0.931	0.664424	0.298	1.15	0.01718	IMPAD1/FAM110B
rs2726553	Geno	8	59781882	G	T	0.145	1.45	8.96459e-05	0.147	0.8	0.0970038	0.146	1.19	0.04303	TOX
rs7837493	Geno	8	61802076	T	C	0.483	0.79	0.000550501	0.492	0.854	0.109408	0.486	0.81	0.0002171	CHD7/CLVS1
rs9643418	Imp	8	74824879	G	C	0.492	1.26	0.000452116	0.486	1.005	0.615768	0.49	1.16	0.002264	Metazoa_SRP/TCEB1
rs34776921	Imp	8	82704146	G	T	0.07	0.55	0.000304025	0.079	0.642	0.0456933	0.073	0.59	4.723e-05	CHMP4C/SNX16
rs1562719	Imp	8	84009606	A	G	0.603	1.28	0.000615608	0.616	0.799	0.0617497	0.607	1.07	0.1314	SNX16/RALYL
rs7836023	Imp	8	90608104	C	T	0.287	0.76	0.000260967	0.27	0.959	0.957008	0.281	0.83	0.004827	MMP16/RIPK2
rs17756061	Imp	8	93489016	A	G	0.129	1.47	6.17278e-05	0.126	1.013	0.984223	0.128	1.3	0.001681	RUNX1T1/TRIQK
rs141765611	Imp	8	98176428	G	A	0.076	0.51	0.000472796	0.074	0.85	0.310481	0.075	0.64	0.0007688	CPQ/TSPYL5
rs16896628	Geno	8	99100559	G	A	0.266	1.38	0.000218243	0.265	1.097	0.336759	0.266	1.27	0.0004876	C8orf47
rs3015840	Imp	8	101565697	T	C	0.399	1.38	8.11266e-05	0.382	1.047	0.758055	0.394	1.24	0.001073	ANKRD46
rs77179439	Imp	8	103184684	C	G	0.075	1.6	0.000214715	0.077	0.615	0.0341459	0.075	1.19	0.1168	NCALD/RRM2B
rs2927157	Imp	8	108097307	T	A	0.839	1.44	0.000567924	0.846	0.887	0.920301	0.841	1.19	0.008549	ABRA/ANGPT1
rs17368310	Geno	8	110472066	C	G	0.05	1.65	0.000112141	0.051	1.659	0.101591	0.05	1.65	5.358e-05	PKHD1L1
rs2948999	Imp	8	111306404	A	C	0.706	1.4	5.92191e-05	0.706	1.15	0.0816265	0.706	1.3	2.399e-05	KCNV1/CSMD3
rs1351744	Imp	8	116563879	C	A	0.582	1.32	0.00030703	0.585	1.16	0.0690281	0.583	1.26	7.668e-05	TRPS1
rs7845491	Imp	8	118048033	G	A	0.374	1.28	0.000462961	0.384	1.068	0.449608	0.377	1.2	0.001341	SLC30A8
rs12545372	Imp	8	119822573	A	T	0.564	0.8	0.00089899	0.553	0.93	0.719343	0.56	0.84	0.004833	SAMD12/TNFRSF11B
rs12546615	Imp	8	123042548	A	G	0.359	0.78	0.000419279	0.368	0.945	0.450281	0.361	0.84	0.001252	HAS2/ZHX2
rs7838563	Imp	8	126289877	C	T	0.644	0.79	0.000379092	0.636	0.878	0.231578	0.641	0.82	0.0004264	NSMCE2
rs9656816	Imp	8	128534654	A	G	0.908	0.65	9.00502e-05	0.899	0.928	0.927728	0.905	0.74	0.002681	POU5F1B/CASC11
rs10103789	Imp	8	130928579	A	C	0.074	1.62	2.34622e-05	0.084	1.083	0.626476	0.077	1.4	0.0003094	FAM49B
rs7465008	Imp	8	131897722	T	C	0.255	0.73	0.000473132	0.236	1.058	0.733134	0.249	0.84	0.01182	ADCY8
rs4897631	Imp	8	135165503	C	T	0.471	1.34	0.000238503	0.456	1.109	0.2593	0.466	1.25	0.0003511	ST3GAL1/ZFAT
rs28833242	Imp	8	135247053	T	C	0.151	1.53	6.77513e-06	0.153	1.066	0.484611	0.151	1.35	7.754e-05	ST3GAL1/ZFAT
rs11779125	Imp	8	138591812	T	C	0.364	0.76	0.000464176	0.354	1.114	0.365236	0.361	0.87	0.03008	KHDRBS3/FAM135B
rs34385549	Imp	8	142238553	A	G	0.25	1.41	0.000205329	0.226	1.125	0.459284	0.242	1.31	0.0007743	SLC45A4
rs11167136	Geno	8	143310815	A	G	0.434	1.26	7.92826e-05	0.431	1.006	0.88134	0.433	1.16	0.001494	TSNARE1
rs11784833	Imp	8	145063412	C	T	0.368	1.35	0.000127662	0.372	1.109	0.32807	0.369	1.26	0.0003145	PARP10
rs7039675	Imp	9	2278436	T	C	0.854	0.73	0.000102962	0.856	1.024	0.890224	0.855	0.81	0.001811	SMARCA2/VLDLR
rs10965440	Imp	9	2284224	T	C	0.297	0.75	0.0004121	0.276	1.033	0.67725	0.291	0.84	0.01245	SMARCA2/VLDLR
rs61635545	Imp	9	4174205	T	G	0.055	1.66	0.000134629	0.06	1.346	0.0805944	0.057	1.54	4.639e-05	GLIS3
rs7045033	Imp	9	4360194	T	C	0.692	0.8	0.000415805	0.685	1.068	0.579808	0.69	0.89	0.01589	GLIS3/SLC1A1
rs818882	Geno	9	7015330	G	T	0.84	0.69	0.000359054	0.864	0.841	0.200803	0.848	0.74	0.0003356	KDM4C
rs7045222	Geno	9	7027194	T	C	0.257	0.7	1.98052e-05	0.285	1.087	0.984744	0.266	0.84	0.0008966	KDM4C
rs71497139	Imp	9	9447263	A	C	0.051	1.49	0.000600699	0.038	0.795	0.203595	0.047	1.28	0.05925	PTPRD
rs13286440	Imp	9	15085993	C	T	0.137	0.69	0.000832207	0.142	0.832	0.648282	0.138	0.74	0.00379	FREM1/TTC39B
rs9776203	Imp	9	16225769	G	A	0.44	1.27	0.000620787	0.448	0.952	0.752045	0.443	1.14	0.004098	C9orf92
rs10117522	Geno	9	26719332	T	C	0.334	1.37	0.000123118	0.338	1.033	0.812598	0.336	1.23	0.001648	TUSC1/CAAP1
rs10757653	Imp	9	27336985	C	T	0.585	0.73	0.000640185	0.592	1.159	0.0680772	0.588	0.87	0.1266	MOB3B
rs76720239	Imp	9	28728638	G	A	0.058	1.57	0.000340427	0.058	0.818	0.789142	0.058	1.29	0.008507	LINGO2
rs6476179	Geno	9	29985815	C	T	0.115	1.47	0.000306186	0.115	0.93	0.453924	0.115	1.27	0.01866	LINGO2/ACO1
rs10738953	Imp	9	35980256	C	T	0.554	1.35	0.000271383	0.55	1.033	0.821044	0.553	1.22	0.002832	OR2S2/RECK
rs6476588	Imp	9	36851754	T	C	0.467	0.76	0.000535957	0.46	0.992	0.903408	0.465	0.84	0.005435	PAX5
rs12550953	Imp	9	38134424	A	T	0.586	0.74	0.000287999	0.564	0.98	0.724437	0.579	0.82	0.002271	SHB/ALDH1B1
rs13287524	Imp	9	38295121	G	T	0.168	0.68	0.000363808	0.16	1.144	0.335664	0.165	0.84	0.029	SHB/ALDH1B1
rs4237230	Imp	9	71970968	A	G	0.68	0.78	0.000240852	0.667	1.03	0.505428	0.676	0.86	0.001024	FAM189A2
rs773018	Imp	9	77774734	C	G	0.133	1.44	0.000253405	0.142	0.807	0.365322	0.136	1.2	0.02187	OSTF1/PCSK5
rs17061731	Imp	9	78478639	T	C	0.084	1.54	4.74539e-05	0.079	1.237	0.19986	0.083	1.43	6.954e-05	OSTF1/PCSK5
rs4745616	Imp	9	79748320	G	A	0.771	0.75	0.000672436	0.78	0.959	0.586773	0.774	0.81	0.002739	FOXB2/VPS13A
rs11141215	Imp	9	88697192	T	C	0.547	1.31	9.94935e-05	0.549	0.913	0.338491	0.548	1.14	0.01459	GOLM1
rs4877999	Imp	9	89272539	G	C	0.618	0.77	0.000845763	0.633	0.914	0.144298	0.623	0.82	0.0004341	ZCCHC6/GAS1
rs60693856	Imp	9	96168343	C	T	0.17	0.72	0.000579628	0.162	0.928	0.501243	0.168	0.79	0.001886	C9orf129/FAM120AOS
rs61548089	Imp	9	102923423	T	C	0.3	0.77	0.000636713	0.291	0.946	0.65657	0.297	0.83	0.003224	INVS
rs5022130	Imp	9	106241014	A	G	0.857	0.72	0.000284177	0.854	1.297	0.0592485	0.856	0.88	0.09751	CYLC2/SMC2
rs4743664	Geno	9	106483432	C	T	0.324	0.77	0.000182513	0.323	0.943	0.981845	0.324	0.83	0.003312	CYLC2/SMC2
rs113483609	Imp	9	107822306	A	G	0.121	0.6	1.90506e-05	0.111	0.971	0.666259	0.118	0.74	0.0003073	ABCA1/SLC44A1
rs9775637	Imp	9	107848594	C	T	0.36	1.28	0.000225937	0.37	1.019	0.897987	0.363	1.18	0.003068	ABCA1/SLC44A1
rs3936578	Geno	9	109482027	C	A	0.498	1.33	0.0003157	0.531	1.163	0.55145	0.508	1.26	0.001445	TMEM38B/ZNF462
rs10759261	Geno	9	110635349	A	G	0.572	0.8	0.00078614	0.565	1.001	0.677178	0.57	0.87	0.01814	KLF4/ACTL7B
rs13440340	Imp	9	112413429	A	G	0.085	1.48	0.000768483	0.097	0.978	0.816141	0.089	1.28	0.005559	PALM2
rs10982504	Imp	9	117801176	A	G	0.298	0.74	0.000897957	0.286	0.87	0.248103	0.294	0.79	0.0009165	TNC
rs944223	Imp	9	117823775	G	A	0.751	0.74	0.000520367	0.752	0.773	0.0523909	0.751	0.75	8.791e-05	TNC
rs75508402	Imp	9	125182723	T	G	0.196	0.69	0.000604105	0.198	0.968	0.457924	0.197	0.79	0.001675	PTGS1/OR1J1
rs10818906	Imp	9	126767150	C	T	0.481	0.76	5.77519e-05	0.5	1.019	0.74274	0.487	0.85	0.0008187	LHX2
rs913772	Geno	9	132085635	T	C	0.544	0.78	0.000181597	0.518	1.045	0.601513	0.536	0.87	0.009381	C9orf106
rs10988420	Geno	9	132308843	T	C	0.264	0.72	0.000109831	0.231	0.926	0.325037	0.253	0.79	0.0002773	C9orf106/NTMT1
rs118087252	Imp	9	135221278	A	C	0.051	1.87	0.000397479	0.048	1.16	0.695004	0.05	1.6	0.002601	SETX
rs7042174	Imp	9	136781655	C	A	0.183	0.69	0.000295846	0.169	0.862	0.597058	0.179	0.75	0.001595	VAV2
rs10114787	Imp	9	140294133	G	A	0.158	1.42	0.000625546	0.172	1.084	0.917028	0.162	1.29	0.006207	EXD3
rs4881522	Imp	10	801076	C	T	0.48	1.26	0.000941087	0.453	0.999	0.946574	0.471	1.16	0.008655	PRR26/LARP4B
rs6602047	Imp	10	3414676	T	A	0.739	1.43	0.000669868	0.745	1.115	0.3152	0.741	1.3	0.001023	PITRM1/KLF6
rs17135209	Geno	10	3442533	T	C	0.186	1.39	0.000292882	0.197	1.034	0.370491	0.19	1.25	0.0007041	PITRM1/KLF6
rs4748127	Imp	10	6576881	T	G	0.246	1.26	0.000736078	0.246	0.888	0.571821	0.246	1.11	0.02238	PRKCQ
rs7081096	Imp	10	7018711	T	C	0.194	0.68	0.000333074	0.193	1.179	0.315775	0.194	0.86	0.02953	PRKCQ/SFMBT2
rs1444773	Imp	10	9075889	G	A	0.255	1.43	4.63241e-06	0.279	1.151	0.164376	0.263	1.32	8.736e-06	GATA3/CELF2
rs74974333	Imp	10	10178848	T	A	0.121	0.59	0.000118311	0.127	0.921	0.942228	0.123	0.72	0.002272	GATA3/CELF2
rs61836082	Imp	10	14260238	C	T	0.179	1.41	9.59058e-05	0.191	1.356	0.11563	0.183	1.39	5.594e-05	FRMD4A
rs61844686	Imp	10	15043760	C	T	0.221	0.71	0.000229923	0.217	0.806	0.159817	0.22	0.74	0.0001733	MEIG1/OLAH
rs7905486	Imp	10	16557560	A	G	0.326	1.29	6.08321e-05	0.337	0.863	0.310126	0.33	1.12	0.01248	C1QL3
rs7907140	Imp	10	17591228	G	A	0.311	1.31	0.000566787	0.302	1.231	0.248934	0.308	1.28	0.000644	ST8SIA6/PTPLA
rs181242111	Imp	10	17865664	A	G	0.158	1.68	6.72326e-05	0.137	0.847	0.381117	0.152	1.38	0.01027	MRC1L1
rs2039515	Imp	10	19608100	A	G	0.866	0.68	5.60388e-05	0.863	1.012	0.771464	0.865	0.77	0.0008736	MALRD1
rs10764181	Geno	10	20279125	A	C	0.632	1.29	0.000465162	0.632	1.215	0.0876424	0.632	1.26	0.0001445	PLXDC2
rs74324742	Imp	10	24012136	C	T	0.088	1.47	0.000175998	0.089	0.85	0.301712	0.088	1.24	0.0223	KIAA1217
rs10828573	Imp	10	24202900	A	G	0.304	1.32	0.000105583	0.319	1.022	0.659409	0.309	1.21	0.0009537	KIAA1217
rs17682991	Imp	10	27967634	T	C	0.202	1.31	0.000849676	0.19	1.008	0.510113	0.198	1.2	0.02819	MKX
rs11596869	Geno	10	29199966	C	T	0.111	1.42	0.000674995	0.11	0.826	0.461495	0.111	1.19	0.02812	C10orf126/LYZL1
rs10826549	Geno	10	29277541	A	G	0.237	0.71	0.00025189	0.239	1.003	0.60768	0.238	0.81	0.001474	C10orf126/LYZL1
rs2297041	Imp	10	30663209	A	G	0.346	1.25	0.000636514	0.346	1.131	0.155998	0.346	1.2	0.0003798	MTPAP
rs4553317	Imp	10	33295950	G	A	0.05	1.65	0.000927459	0.047	0.894	0.639918	0.049	1.38	0.02175	ITGB1/NRP1
rs2210497	Imp	10	45503879	T	C	0.616	0.81	0.000696692	0.62	0.953	0.257546	0.617	0.86	0.000792	ZNF22/OR13A1
rs116110741	Imp	10	56354539	G	T	0.119	0.68	0.000631366	0.117	1.152	0.205459	0.119	0.85	0.06024	PCDH15
rs2393130	Imp	10	58791871	A	G	0.733	0.78	0.00061521	0.706	1.112	0.343381	0.725	0.88	0.0372	ZWINT/IPMK
rs10509070	Imp	10	58801214	C	G	0.053	1.47	0.000964192	0.057	1.069	0.724763	0.054	1.32	0.00514	ZWINT/IPMK
rs16912322	Imp	10	60240744	G	T	0.078	1.49	7.52701e-05	0.082	0.808	0.159786	0.079	1.22	0.02679	TFAM/BICC1
rs3125443	Imp	10	60612015	A	G	0.165	0.71	0.000581806	0.164	1.258	0.136697	0.165	0.9	0.07879	BICC1/PHYHIPL
rs74158906	Imp	10	64198408	T	C	0.154	0.65	0.000488649	0.131	1.025	0.974438	0.147	0.78	0.006076	ZNF365
rs224108	Imp	10	64549611	C	T	0.1	1.43	0.000705448	0.101	1.116	0.359483	0.1	1.31	0.00129	ZNF365/ADO
rs1993848	Imp	10	67796173	T	C	0.225	1.33	0.000206071	0.224	0.828	0.0899476	0.225	1.13	0.06573	CTNNA3
rs10997955	Imp	10	69914664	T	C	0.602	1.3	0.000611957	0.614	1.053	0.89222	0.606	1.2	0.009551	MYPN
rs76989611	Imp	10	75735201	T	C	0.075	1.71	0.000193847	0.083	1.336	0.349087	0.078	1.56	0.0004727	C10orf55/VCL
rs703990	Geno	10	80930439	C	T	0.807	1.42	0.000665971	0.794	1.084	0.437072	0.803	1.28	0.001669	ZMIZ1
rs10788457	Imp	10	87306928	A	T	0.256	1.42	4.73375e-05	0.246	0.89	0.426175	0.253	1.22	0.007341	CCSER2/GRID1
rs12358273	Imp	10	94408857	T	G	0.05	0.52	0.000738925	0.044	0.928	0.681004	0.048	0.68	0.01734	KIF11
rs7099434	Imp	10	94545346	C	T	0.492	1.29	0.000102655	0.485	0.994	0.513067	0.49	1.17	0.00865	HHEX/EXOC6
rs4919483	Imp	10	102468467	C	G	0.506	1.26	0.00048633	0.52	0.99	0.949443	0.51	1.15	0.005706	HIF1AN/PAX2
rs61875724	Imp	10	108055611	G	A	0.051	1.88	0.00050213	0.054	1.074	0.811772	0.052	1.55	0.004148	SORCS3/SORCS1
rs7893250	Imp	10	113114871	G	A	0.775	0.79	0.000993103	0.773	1.04	0.777601	0.774	0.87	0.0166	ADRA2A/GPAM
rs12771602	Imp	10	115615024	T	A	0.075	0.51	0.000174286	0.078	0.952	0.640398	0.076	0.7	0.001266	NHLRC2
rs2619097	Imp	10	118992584	A	C	0.937	0.68	0.000301363	0.93	1.307	0.517869	0.935	0.84	0.01555	KCNK18/SLC18A2
rs1337326	Imp	10	119438168	G	C	0.134	0.68	0.000816693	0.133	0.898	0.109203	0.134	0.76	0.0003008	EMX2/RAB11FIP2
rs12267239	Imp	10	120571163	A	G	0.117	0.58	0.000185148	0.116	1.132	0.191521	0.117	0.77	0.03532	CACUL1/NANOS1
rs11200374	Imp	10	123823540	C	G	0.106	1.53	5.59837e-05	0.104	0.945	0.741608	0.105	1.3	0.003268	TACC2
rs76497870	Imp	10	126679432	A	G	0.066	0.52	0.000780685	0.069	0.848	0.408561	0.067	0.65	0.001688	CTBP2
rs7898721	Geno	10	128267560	C	T	0.46	0.79	0.000962931	0.454	1.125	0.098185	0.458	0.9	0.1221	C10orf90
rs752346	Imp	10	130066964	C	A	0.478	0.79	0.000729107	0.476	0.973	0.915573	0.477	0.85	0.006829	MKI67/MGMT
rs10829383	Geno	10	130116817	T	G	0.255	0.71	0.000487565	0.272	1.073	0.437182	0.261	0.84	0.02516	MKI67/MGMT
rs11023290	Imp	11	2578539	C	A	0.6	1.36	0.000588405	0.591	0.949	0.749638	0.597	1.18	0.01294	KCNQ1
rs61872130	Imp	11	3321510	C	T	0.151	0.57	0.000385675	0.163	1.263	0.0909091	0.155	0.82	0.08597	MRGPRE/ZNF195
rs11040944	Imp	11	6670730	G	C	0.246	1.33	0.000206652	0.246	1.035	0.901108	0.246	1.22	0.00292	DCHS1
rs4758317	Geno	11	8250811	A	C	0.533	0.79	0.000373827	0.533	1.242	0.0268892	0.533	0.93	0.1623	LMO1
rs10831547	Imp	11	11245360	A	C	0.173	0.68	0.000407433	0.169	1.067	0.397668	0.172	0.83	0.02553	ZBED5/GALNT18
rs11022268	Imp	11	12290628	C	T	0.954	0.53	1.1716e-06	0.946	0.967	0.913834	0.951	0.65	0.0001115	MICAL2/MICALCL
rs11022775	Geno	11	13373764	T	C	0.073	1.68	1.69946e-05	0.075	1.116	0.820566	0.073	1.46	0.0004631	ARNTL
rs10832366	Imp	11	15156634	G	A	0.588	0.76	0.00026367	0.568	0.94	0.538673	0.582	0.82	0.001221	INSC
rs10832515	Imp	11	15768652	T	C	0.275	1.32	0.000190757	0.277	0.982	0.671939	0.276	1.19	0.008053	INSC/SOX6
rs61882417	Imp	11	17863138	C	A	0.133	1.58	5.25748e-05	0.126	1.05	0.83516	0.131	1.38	0.001007	SERGEF
rs2631426	Imp	11	24764300	C	T	0.55	0.73	0.000116214	0.563	0.837	0.0504379	0.554	0.76	2.318e-05	LUZP2
rs934463	Geno	11	28962881	C	T	0.203	1.36	0.000235193	0.199	0.892	0.194637	0.202	1.18	0.03912	METTL15/KCNA4
rs12799106	Imp	11	30487714	C	T	0.113	0.63	0.000257815	0.116	0.866	0.790717	0.114	0.72	0.007172	MPPED2
rs11031119	Imp	11	30525773	G	A	0.353	0.73	0.000137362	0.37	0.982	0.586603	0.358	0.82	0.008322	MPPED2
rs59377579	Imp	11	35370337	A	G	0.097	1.52	0.000218999	0.099	0.935	0.848887	0.098	1.28	0.00564	SLC1A2
rs72890593	Imp	11	39867137	G	A	0.076	1.66	0.000868338	0.088	0.698	0.155597	0.08	1.26	0.08645	LRRC4C
rs16935026	Geno	11	40669349	G	A	0.198	1.31	0.000517442	0.187	0.847	0.475055	0.194	1.14	0.02347	LRRC4C
rs2863104	Geno	11	44550047	C	T	0.238	0.74	0.000663579	0.237	0.975	0.743452	0.238	0.82	0.004191	ALX4/CD82
rs174617	Imp	11	61629166	G	A	0.453	1.28	0.000418858	0.479	0.921	0.175985	0.461	1.14	0.05604	FADS2
rs75306442	Imp	11	61641396	T	C	0.2	1.36	0.00011287	0.204	0.899	0.219366	0.201	1.18	0.02451	FADS3
rs6591188	Geno	11	65467953	C	T	0.371	1.31	0.000171114	0.371	1.055	0.521676	0.371	1.21	0.0008509	RELA/KAT5
rs2452682	Imp	11	65812609	G	A	0.836	0.68	4.66823e-06	0.832	1.056	0.788087	0.835	0.78	0.0001806	GAL3ST3
rs4944083	Imp	11	70841221	G	A	0.722	0.79	0.000973725	0.715	1.105	0.572434	0.72	0.89	0.02617	SHANK2
rs1513781	Imp	11	72381628	G	A	0.905	0.77	0.000796779	0.906	1.017	0.246441	0.905	0.84	0.05795	PDE2A
rs2212434	Imp	11	76281593	T	C	0.459	1.29	0.000337057	0.477	1.467	8.21407e-05	0.465	1.35	1.447e-07	C11orf30/LRRC32
rs7927626	Imp	11	79968111	T	A	0.064	0.47	0.000232121	0.063	1.23	0.407253	0.064	0.77	0.01838	TENM4/FAM181B
rs7926185	Imp	11	83578420	G	A	0.229	0.7	0.000358872	0.218	1.038	0.594719	0.226	0.81	0.01408	DLG2
rs55858715	Imp	11	86685696	T	G	0.07	1.73	3.94328e-05	0.07	1.482	0.0333204	0.07	1.64	5.631e-06	FZD4/TMEM135
rs2156174	Imp	11	86689971	G	C	0.189	1.35	0.000465054	0.211	1.05	0.89535	0.196	1.23	0.004861	FZD4/TMEM135
rs2220304	Geno	11	87819271	A	G	0.49	1.33	0.000326448	0.485	0.967	0.443108	0.488	1.18	0.01992	TMEM135/RAB38
rs217120	Imp	11	88036839	C	T	0.329	1.33	0.000156249	0.325	0.946	0.221388	0.327	1.18	0.02854	CTSC
rs76321996	Imp	11	95233575	C	G	0.108	1.43	0.000742046	0.118	1.029	0.771732	0.111	1.28	0.004859	SESN3/FAM76B
rs78973513	Imp	11	97137756	G	T	0.059	1.61	0.000562701	0.061	0.956	0.77153	0.059	1.36	0.004036	JRKL/CNTN5
rs10890847	Imp	11	97646357	T	A	0.215	1.37	0.000121239	0.207	1.069	0.818644	0.213	1.26	0.001658	JRKL/CNTN5
rs2212727	Imp	11	100403144	G	A	0.231	1.32	0.000478852	0.216	0.836	0.45274	0.226	1.15	0.02388	CNTN5/ARHGAP42
rs4385869	Imp	11	102230255	A	G	0.286	1.34	0.000454059	0.294	1.118	0.79979	0.289	1.26	0.003764	BIRC2
rs72983521	Imp	11	102730033	C	T	0.073	0.57	0.000441625	0.072	0.563	0.00538937	0.073	0.57	7.385e-06	MMP3/MMP12
rs10791659	Imp	11	103859613	A	G	0.11	0.62	0.000612644	0.107	1.24	0.101558	0.109	0.84	0.09819	PDGFD
rs79590713	Imp	11	107818965	A	G	0.055	0.42	0.000427627	0.065	0.897	0.489927	0.058	0.62	0.00146	RAB39A
rs111264090	Imp	11	114078686	A	G	0.269	1.27	0.000300743	0.275	0.98	0.934451	0.271	1.16	0.00557	ZBTB16
rs2604294	Geno	11	114156318	C	T	0.738	0.78	0.000818564	0.749	1.066	0.712848	0.741	0.86	0.01712	NNMT
rs17470840	Imp	11	116003035	C	T	0.098	0.62	0.000961968	0.1	1.081	0.521172	0.099	0.79	0.02939	CADM1/BUD13
rs10892246	Geno	11	118481431	G	A	0.619	1.37	0.000117452	0.625	0.874	0.193649	0.621	1.15	0.02804	PHLDB1
rs2060010	Imp	11	121206488	T	C	0.558	1.31	0.000281956	0.559	1.035	0.503334	0.559	1.2	0.001137	SC5D/SORL1
rs77533050	Imp	11	121207442	T	C	0.108	0.61	8.59396e-05	0.105	1.033	0.458823	0.107	0.76	0.0004154	SC5D/SORL1
rs34057425	Imp	11	123341589	A	T	0.346	0.72	2.72365e-05	0.337	0.962	0.670776	0.343	0.8	0.0003964	CLMP/GRAMD1B
rs642993	Imp	11	126071595	C	G	0.28	0.76	0.000410977	0.282	1.014	0.282822	0.281	0.85	0.03671	CDON/RPUSD4
rs2511766	Geno	11	131111310	C	T	0.86	1.48	0.000878952	0.872	0.792	0.0820323	0.864	1.15	0.1304	SNX19/NTM
rs4937727	Imp	11	132697394	G	A	0.412	1.33	0.000218707	0.378	1.027	0.308396	0.401	1.21	0.0004263	OPCML
rs10750580	Imp	11	134633538	G	A	0.831	0.74	0.000557496	0.815	1.255	0.128056	0.826	0.89	0.08085	B3GAT1
rs77474006	Imp	12	248071	C	G	0.065	1.63	0.00026375	0.057	0.877	0.900267	0.062	1.37	0.00341	IQSEC3
rs10744538	Imp	12	279586	C	T	0.495	0.78	0.000299207	0.49	1.035	0.505083	0.494	0.87	0.01603	IQSEC3
rs11062225	Imp	12	2535989	C	T	0.701	0.76	0.000791262	0.697	1.219	0.234541	0.7	0.9	0.06024	CACNA1C
rs2968909	Imp	12	2897864	G	C	0.17	1.4	0.000216967	0.173	1.167	0.136166	0.171	1.3	0.0001338	CACNA1C-IT3/FKBP4
rs79952790	Imp	12	15224313	A	C	0.225	1.32	0.00096202	0.216	1.163	0.110065	0.222	1.26	0.0003483	PDE6H/RERG
rs1671473	Geno	12	16277435	C	A	0.381	0.72	7.15687e-06	0.359	1.174	0.387723	0.374	0.87	0.003007	DERA/SLC15A5
rs56344966	Imp	12	16280913	A	G	0.304	0.68	4.86527e-06	0.308	1.089	0.526132	0.305	0.82	0.001502	DERA/SLC15A5
rs11044571	Imp	12	19606213	T	A	0.56	0.78	0.00078709	0.577	0.981	0.49308	0.566	0.85	0.002286	AEBP2
rs11046649	Imp	12	22999302	G	T	0.36	0.73	0.00033916	0.36	1.166	0.101107	0.36	0.87	0.07585	ETNK1/SOX5
rs11046815	Imp	12	23281016	T	C	0.383	1.3	0.000228733	0.38	0.91	0.0554279	0.382	1.14	0.09251	ETNK1/SOX5
rs7970717	Imp	12	30236507	G	A	0.254	0.73	0.000459435	0.235	0.967	0.460057	0.248	0.81	0.001385	TMTC1/IPO8
rs80046882	Imp	12	42175864	G	A	0.068	0.62	0.00098224	0.064	1.074	0.0801484	0.067	0.79	0.1384	PDZRN4/GXYLT1
rs12372597	Imp	12	42412850	T	C	0.362	0.72	1.54726e-05	0.347	0.887	0.267368	0.357	0.77	4.734e-05	PDZRN4/GXYLT1
rs11835116	Imp	12	47394014	T	C	0.091	0.57	0.000365029	0.097	1.115	0.36447	0.093	0.76	0.02657	SLC38A4/AMIGO2
rs4758989	Imp	12	55338517	C	T	0.228	1.26	0.000859446	0.236	0.952	0.752174	0.231	1.14	0.01612	MUCL1/TESPA1
rs56204857	Imp	12	55340920	A	G	0.052	1.71	3.34927e-05	0.048	0.613	0.0467593	0.051	1.34	0.04564	MUCL1/TESPA1
rs139668503	Imp	12	58626430	T	C	0.096	1.52	0.000911838	0.097	0.944	0.674143	0.097	1.3	0.01992	XRCC6BP1/RP11-362K2.2
rs1908536	Imp	12	58838688	G	C	0.509	1.37	3.29317e-05	0.521	0.982	0.952078	0.513	1.21	0.001035	XRCC6BP1/RP11-362K2.2
rs12371950	Imp	12	63342364	T	C	0.11	0.62	0.000637942	0.115	0.919	0.650135	0.112	0.74	0.003171	PPM1H/AVPR1A
rs521964	Imp	12	63816645	T	C	0.341	0.8	0.000811678	0.353	0.96	0.217089	0.345	0.86	0.000708	AVPR1A/DPY19L2
rs7973667	Imp	12	67159719	C	T	0.051	1.73	0.000409996	0.047	0.912	0.942258	0.049	1.42	0.00663	GRIP1
rs17105481	Imp	12	68822840	G	A	0.12	0.67	0.000523439	0.116	1.075	0.835236	0.118	0.81	0.004524	MDM1/RAP1B
rs7976537	Imp	12	69784986	T	A	0.41	1.36	9.57704e-05	0.419	0.944	0.590828	0.413	1.19	0.006699	YEATS4/FRS2
rs9783470	Imp	12	71863278	A	G	0.055	1.59	0.000775071	0.053	0.88	0.673752	0.055	1.33	0.01813	LGR5
rs10785021	Geno	12	73763389	G	A	0.218	0.75	0.000556226	0.221	0.824	0.0558818	0.219	0.78	0.0001001	TRHDE/ATXN7L3B
rs66654091	Imp	12	74598002	C	A	0.136	1.38	0.000619841	0.129	0.881	0.496115	0.134	1.2	0.02454	TRHDE/ATXN7L3B
rs61950692	Imp	12	86689062	C	T	0.157	1.41	0.000486308	0.147	1.142	0.728594	0.154	1.31	0.003268	MGAT4C
rs10858588	Imp	12	87785334	T	C	0.126	1.43	0.000902724	0.134	0.875	0.31079	0.129	1.2	0.05002	MGAT4C/C12orf50
rs7298875	Geno	12	94601905	C	T	0.901	1.74	0.000929414	0.912	1.309	0.213755	0.905	1.54	0.0007721	PLXNC1
rs17815347	Imp	12	98787881	A	G	0.214	1.43	0.000311702	0.218	0.862	0.15403	0.215	1.2	0.05409	RMST/TMPO
rs7306479	Imp	12	99796670	C	T	0.218	1.28	0.000693498	0.219	1.031	0.445559	0.218	1.19	0.001772	ANKS1B
rs10860909	Imp	12	103140560	T	C	0.351	1.3	0.000316863	0.349	1.243	0.31409	0.35	1.28	0.0005787	IGF1/PAH
rs7956692	Imp	12	104072343	T	C	0.063	0.56	0.000434881	0.072	1.481	0.0626125	0.066	0.91	0.1129	STAB2
rs113638563	Imp	12	105890999	T	C	0.113	1.44	0.000904692	0.116	0.919	0.667349	0.114	1.23	0.02014	C12orf75/CASC18
rs61934480	Imp	12	109855118	T	C	0.065	1.47	0.000754992	0.063	0.899	0.562287	0.064	1.26	0.02323	MYO1H
rs12580914	Imp	12	115572543	T	C	0.206	0.72	0.000344634	0.196	1.11	0.684933	0.203	0.86	0.01101	TBX3/MED13L
rs225475	Geno	12	126462568	A	C	0.069	1.56	4.85493e-05	0.071	0.903	0.332766	0.07	1.33	0.01021	TMEM132B/TMEM132C
rs10773218	Imp	12	126463933	A	G	0.173	1.44	0.000483936	0.185	0.834	0.0911503	0.177	1.19	0.09476	TMEM132B/TMEM132C
rs7972200	Geno	12	128000966	G	A	0.628	0.73	2.27765e-05	0.625	0.97	0.897429	0.627	0.81	0.0007013	TMEM132B/TMEM132C
rs12313855	Imp	12	128503447	C	A	0.13	1.43	0.00013863	0.127	0.804	0.387072	0.129	1.19	0.01483	TMEM132B/TMEM132C
rs1982938	Imp	12	130867881	C	T	0.698	0.77	0.000284098	0.685	1.126	0.397382	0.694	0.88	0.02108	PIWIL1/RIMBP2
rs113366081	Imp	12	132609257	G	A	0.07	1.73	4.25124e-05	0.066	0.985	0.756482	0.069	1.48	0.0006964	EP400NL
rs28399785	Imp	12	132982114	G	A	0.265	1.29	0.000718239	0.273	1.043	0.553959	0.267	1.19	0.002598	GALNT9/MUC8
rs9510001	Geno	13	22710015	G	A	0.166	1.35	0.000627849	0.168	0.984	0.949256	0.167	1.2	0.006717	FGF9/SGCG
rs11618868	Geno	13	22780403	G	A	0.062	1.63	0.000559691	0.065	0.967	0.888184	0.063	1.38	0.009124	FGF9/SGCG
rs78147149	Imp	13	28278287	T	A	0.052	1.63	0.00067807	0.049	0.728	0.0846161	0.051	1.3	0.1146	POLR1D/GSX1
rs34058192	Imp	13	28373880	T	A	0.09	1.57	0.000149874	0.074	0.973	0.654615	0.085	1.37	0.007317	GSX1/PDX1
rs7331582	Imp	13	30302063	C	G	0.201	1.36	0.000338471	0.204	0.985	0.992374	0.202	1.22	0.005215	SLC7A1/UBL3
rs914760	Imp	13	30683036	C	T	0.424	0.74	0.000325739	0.412	1.17	0.377616	0.42	0.88	0.02405	UBL3/KATNAL1
rs117840084	Imp	13	40138094	G	A	0.06	1.63	0.000366395	0.074	1.353	0.41014	0.064	1.52	0.0009755	LHFP
rs4941965	Imp	13	40864330	C	T	0.693	0.73	0.000267329	0.718	1.053	0.363963	0.701	0.83	0.02259	COG6/FOXO1
rs6561218	Imp	13	45859803	C	T	0.628	0.76	0.000656575	0.664	0.981	0.899219	0.64	0.83	0.009817	KCTD4/TPT1
rs806327	Imp	13	50849789	G	A	0.636	1.28	0.000622155	0.648	0.968	0.36784	0.639	1.15	0.03482	DLEU1
rs17629882	Geno	13	55607917	C	T	0.096	0.61	0.000297158	0.096	0.877	0.47998	0.096	0.71	0.001087	OLFM4/PRR20A
rs7335822	Imp	13	61592871	A	C	0.493	1.35	0.000472213	0.488	1.036	0.783306	0.491	1.22	0.003702	TDRD3/PCDH20
rs9598260	Imp	13	61920056	C	A	0.568	1.32	0.000107038	0.581	0.975	0.871713	0.572	1.18	0.003442	TDRD3/PCDH20
rs35171800	Imp	13	63937525	A	C	0.207	1.33	0.000508209	0.197	0.945	0.941601	0.204	1.19	0.005759	PCDH20/PCDH9
rs9571681	Imp	13	67450293	C	T	0.412	0.76	0.000683565	0.406	0.913	0.152539	0.41	0.81	0.0003912	PCDH9
rs2050279	Imp	13	71900359	T	C	0.054	1.78	9.43744e-05	0.05	0.773	0.659353	0.052	1.41	0.005526	ATXN8OS/DACH1
rs1931448	Imp	13	71908403	C	A	0.795	0.71	3.57729e-05	0.796	1.038	0.814416	0.796	0.81	0.002057	ATXN8OS/DACH1
rs1924972	Imp	13	73014415	A	G	0.469	1.38	8.96839e-05	0.478	1.046	0.925243	0.472	1.24	0.00182	DACH1/MZT1
rs4885372	Imp	13	76572610	C	G	0.627	0.71	3.45598e-07	0.618	1.115	0.173375	0.624	0.83	0.001742	C13orf45/KCTD12
rs12877102	Imp	13	76670140	C	A	0.1	1.55	0.000104291	0.104	0.847	0.115396	0.101	1.28	0.04057	C13orf45/KCTD12
rs1408612	Imp	13	78720183	C	T	0.636	0.78	0.000653815	0.657	1.077	0.423942	0.642	0.87	0.03055	EDNRB/POU4F1
rs9601013	Imp	13	78809094	C	G	0.18	0.67	0.000260009	0.18	1.006	0.60196	0.18	0.78	0.0115	EDNRB/POU4F1
rs1330470	Imp	13	92549622	C	T	0.28	0.66	0.000277273	0.263	0.922	0.916623	0.274	0.75	0.005529	GPC5
rs9523999	Geno	13	93941271	G	A	0.057	0.51	0.000409797	0.064	1.016	0.710684	0.059	0.72	0.01145	GPC6
rs2792953	Imp	13	98344781	C	T	0.503	0.81	0.000694345	0.484	1.067	0.571556	0.497	0.9	0.02167	RAP2A/IPO5
rs4772207	Imp	13	100115051	T	C	0.139	1.47	0.000266377	0.132	0.978	0.772582	0.137	1.27	0.002459	GPR183/TM9SF2
rs9518364	Geno	13	101937373	G	A	0.58	0.74	0.00014389	0.611	1.112	0.166305	0.59	0.86	0.03529	NALCN
rs2026504	Imp	13	104126229	T	G	0.942	0.61	0.000513264	0.937	0.701	0.0316433	0.941	0.64	5.011e-05	SLC10A2/DAOA
rs9514823	Geno	13	108832436	A	G	0.645	0.75	0.000223942	0.654	0.947	0.734062	0.648	0.82	0.007575	FAM155A-IT1/LIG4
rs1957960	Geno	14	28718537	A	G	0.706	0.77	0.000550009	0.708	0.898	0.447941	0.706	0.82	0.001511	NOVA1/FOXG1
rs1959182	Imp	14	33532276	T	A	0.337	0.73	2.74381e-05	0.309	1.064	0.699094	0.328	0.85	0.00241	NPAS3
rs4403967	Imp	14	35050586	T	G	0.87	0.72	0.000765856	0.868	1.257	0.43277	0.87	0.87	0.03248	SNX6
rs61999442	Imp	14	39617809	G	T	0.057	0.54	0.000239494	0.067	1.232	0.42637	0.06	0.82	0.01767	TRAPPC6B
rs12432772	Imp	14	40584036	T	A	0.564	1.33	0.000598791	0.543	1.029	0.746236	0.557	1.21	0.00394	FBXO33/LRFN5
rs78569997	Imp	14	48713435	G	T	0.06	1.68	0.000982618	0.066	0.702	0.137354	0.062	1.26	0.09968	MDGA2/RPS29
rs35988541	Imp	14	56191398	G	A	0.092	1.53	0.000149041	0.089	0.92	0.869408	0.091	1.29	0.002176	KTN1/PELI2
rs111845179	Imp	14	59317502	T	C	0.051	1.77	0.000316852	0.054	1.122	0.207327	0.052	1.53	0.000318	DACT1/DAAM1
rs118180282	Imp	14	71053306	G	A	0.069	0.57	0.000393231	0.068	1.067	0.913111	0.069	0.76	0.006922	MED6
rs11158940	Imp	14	72522542	G	C	0.194	1.37	0.000720734	0.183	1.018	0.803695	0.19	1.24	0.01291	RGS6
rs12590592	Imp	14	72589451	T	G	0.545	0.79	0.000919885	0.547	0.933	0.540457	0.546	0.84	0.002971	RGS6
rs4508370	Imp	14	75115887	A	G	0.202	0.72	0.000831362	0.175	1.132	0.34512	0.193	0.86	0.04327	LTBP2/AREL1
rs12590176	Imp	14	76697527	C	T	0.637	0.76	0.000973076	0.642	0.938	0.341951	0.638	0.82	0.001526	GPATCH2L
rs72688934	Imp	14	79653086	G	C	0.051	1.77	0.00092586	0.052	1.352	0.679424	0.051	1.6	0.004439	NRXN3
rs2003747	Imp	14	81927040	C	T	0.05	1.62	0.000854291	0.057	1.054	0.88271	0.052	1.38	0.007001	STON2/SEL1L
rs1756649	Imp	14	87635715	G	A	0.252	0.72	0.000510198	0.261	1.012	0.783836	0.255	0.83	0.01098	FLRT2/GALC
rs4143886	Imp	14	91344360	A	G	0.104	1.38	0.000566608	0.107	1.107	0.476487	0.105	1.28	0.001706	RPS6KA5
rs1884211	Geno	14	94449792	G	A	0.468	0.78	0.000411304	0.468	0.939	0.416716	0.468	0.84	0.001089	ASB2/OTUB2
rs7149043	Geno	14	95116292	C	T	0.891	0.75	0.000579505	0.884	1.225	0.300972	0.889	0.88	0.04116	SERPINA3/GSC
rs60929881	Imp	14	101556857	G	C	0.172	1.5	0.000883859	0.175	1.034	0.513178	0.173	1.31	0.002651	MEG9/DIO3
rs4900490	Geno	14	101646749	A	G	0.869	0.69	0.000140725	0.862	0.843	0.315219	0.867	0.74	0.0003174	MEG9/DIO3
rs67232936	Imp	14	105645187	A	T	0.156	1.46	0.000128125	0.149	1.111	0.752534	0.153	1.33	0.00143	NUDT14
rs7154463	Imp	14	105760430	C	T	0.283	0.7	0.000107327	0.287	1.141	0.430436	0.285	0.85	0.0113	BRF1
rs58079476	Imp	15	24465204	T	A	0.058	1.65	3.84371e-05	0.062	1.117	0.539663	0.059	1.45	0.00032	PWRN2/PWRN3
rs12905662	Imp	15	24466070	C	T	0.531	1.3	0.00016056	0.534	0.936	0.368201	0.532	1.15	0.01703	PWRN2/PWRN3
rs4281679	Imp	15	26886442	T	C	0.092	0.57	0.00011746	0.092	1.07	0.937246	0.092	0.75	0.003085	GABRB3
rs897174	Imp	15	27469922	G	A	0.17	0.7	0.000597181	0.163	1.172	0.0985076	0.168	0.87	0.09897	GABRG3
rs12591935	Imp	15	32913030	C	G	0.349	0.72	0.00026031	0.347	0.96	0.709736	0.348	0.8	0.002036	ARHGAP11A
rs11634439	Geno	15	32922947	G	T	0.771	0.76	0.00092968	0.786	0.939	0.837604	0.776	0.81	0.01396	ARHGAP11A
rs1390161	Imp	15	33990294	A	G	0.413	0.74	0.000119441	0.403	0.927	0.737838	0.41	0.8	0.001308	RYR3
rs891345	Geno	15	34018372	T	C	0.178	1.49	2.32258e-05	0.17	1.043	0.812812	0.175	1.33	0.001592	RYR3
rs9796559	Imp	15	43331246	G	T	0.712	1.32	0.000794711	0.7	0.973	0.780121	0.708	1.16	0.01444	UBR1
rs12903351	Imp	15	46547456	G	C	0.236	0.72	0.000523979	0.241	1.024	0.912191	0.238	0.83	0.008287	SQRDL/SEMA6D
rs8032966	Imp	15	46619068	C	T	0.544	0.77	0.000851105	0.53	0.954	0.708307	0.539	0.83	0.004524	SQRDL/SEMA6D
rs12907539	Imp	15	49994615	A	G	0.738	0.73	0.000377489	0.722	0.912	0.336308	0.733	0.79	0.0007316	DTWD1/ATP8B4
rs75484630	Imp	15	53882505	A	C	0.095	1.43	0.00065307	0.085	1.132	0.578547	0.092	1.33	0.002618	WDR72
rs1026695	Imp	15	54219449	A	C	0.345	0.74	0.000196177	0.34	0.974	0.803552	0.344	0.82	0.002183	WDR72/UNC13C
rs11858796	Imp	15	58464126	G	A	0.26	1.28	0.000789198	0.249	0.995	0.945715	0.256	1.17	0.0099	ALDH1A2/AQP9
rs78198340	Imp	15	63186647	A	G	0.062	0.49	0.000638123	0.055	1.261	0.398906	0.059	0.73	0.0323	TLN2/TPM1
rs113168916	Imp	15	65181556	T	C	0.094	0.57	0.000864787	0.093	1.2	0.144058	0.094	0.8	0.09106	PLEKHO2/ANKDD1A
rs11633520	Imp	15	74284805	G	C	0.583	0.73	4.8129e-06	0.58	0.944	0.297156	0.582	0.8	2.413e-05	STOML1
rs2075590	Imp	15	74709566	G	T	0.124	0.62	0.000681608	0.136	0.998	0.87562	0.128	0.76	0.0106	SEMA7A
rs2959860	Imp	15	76454335	T	C	0.304	0.71	0.000439646	0.293	0.916	0.42764	0.3	0.78	0.001191	C15orf27
rs8041752	Imp	15	84954069	T	C	0.189	1.36	0.000988887	0.187	0.74	0.0321112	0.188	1.12	0.217	GOLGA6L4/ZSCAN2
rs112470015	Imp	15	85824802	T	C	0.069	1.45	0.000690596	0.062	1.158	0.520359	0.066	1.35	0.002274	GOLGA6L3/AKAP13
rs12909463	Imp	15	89450911	G	A	0.623	0.74	7.56558e-05	0.617	1.059	0.607317	0.621	0.84	0.005596	MFGE8
rs56118728	Imp	15	89516428	A	G	0.351	0.72	0.000269157	0.347	1.096	0.562659	0.35	0.85	0.01298	MFGE8/ABHD2
rs72649555	Imp	15	94261317	A	G	0.101	1.52	0.000176301	0.104	1.102	0.55031	0.102	1.36	0.0009576	RGMA/MCTP2
rs7163806	Imp	15	94918650	T	A	0.688	0.74	0.000510394	0.687	0.942	0.928585	0.688	0.8	0.007847	MCTP2
rs9929621	Geno	16	679412	T	C	0.21	0.7	0.000500904	0.218	0.901	0.648324	0.213	0.78	0.002671	WFIKKN1
rs35455787	Imp	16	780736	G	C	0.092	1.68	0.000515619	0.09	0.895	0.76045	0.091	1.39	0.003699	HAGHL/NARFL
rs11552431	Geno	16	1823024	T	G	0.121	1.52	0.000261065	0.132	1.04	0.97977	0.125	1.33	0.004134	MRPS34
rs8056422	Imp	16	5734841	C	T	0.88	0.71	0.000641874	0.865	0.956	0.260205	0.875	0.79	0.000754	FAM86A/RBFOX1
rs12445376	Imp	16	8581001	G	A	0.197	1.31	0.000694349	0.197	0.844	0.422859	0.197	1.13	0.03164	RBFOX1/TMEM114
rs3743804	Imp	16	8953737	A	G	0.518	1.28	0.00097898	0.512	0.929	0.789061	0.516	1.14	0.01605	CARHSP1
rs10431894	Imp	16	10646210	A	G	0.069	1.52	0.000343932	0.066	1.059	0.998769	0.068	1.35	0.005156	EMP2
rs12149568	Imp	16	10747954	C	A	0.505	1.28	0.000511056	0.536	1.063	0.868458	0.515	1.19	0.004837	TEKT5
rs4781499	Imp	16	13630944	G	A	0.135	1.39	0.000282164	0.152	1.082	0.448694	0.14	1.27	0.0009351	SHISA9/ERCC4
rs2283505	Imp	16	16285093	C	T	0.689	0.75	4.77851e-05	0.681	0.971	0.604365	0.686	0.82	0.0004659	ABCC6
rs2311140	Imp	16	17328932	G	A	0.768	0.76	0.000167397	0.783	0.973	0.538207	0.773	0.82	0.0008867	XYLT1
rs183001	Imp	16	23354786	A	G	0.449	0.72	4.66553e-05	0.448	1.008	0.808948	0.449	0.82	0.002449	SCNN1B
rs890844	Imp	16	24507123	A	T	0.628	1.25	0.000951825	0.646	1.105	0.590368	0.633	1.19	0.003532	CACNG3/RBBP6
rs4787690	Geno	16	25097500	G	T	0.473	0.8	0.000820803	0.471	1.077	0.797094	0.472	0.89	0.005539	ARHGAP17/LCMT1
rs28624746	Imp	16	28335370	G	A	0.747	1.37	0.000741949	0.751	0.929	0.60577	0.748	1.18	0.02073	SBK1/NPIPB6
rs153110	Imp	16	28516719	A	G	0.128	1.43	0.000189527	0.139	0.965	0.755235	0.131	1.25	0.00187	IL27
rs7186521	Imp	16	53792922	G	A	0.46	0.8	0.000563799	0.451	1.037	0.95366	0.457	0.88	0.007876	FTO
rs56057753	Imp	16	53850903	T	C	0.221	0.69	1.48441e-05	0.21	0.926	0.620736	0.217	0.78	0.0002226	FTO
rs34473486	Imp	16	55017281	T	C	0.228	1.38	4.75421e-05	0.223	0.865	0.0724078	0.226	1.17	0.03985	IRX5/IRX6
rs59821674	Imp	16	55498690	A	C	0.172	1.38	0.000461466	0.18	1.182	0.247121	0.175	1.3	0.0005437	MMP2
rs7185320	Geno	16	57101373	G	A	0.052	1.57	0.000228009	0.057	1.109	0.592785	0.054	1.39	0.001314	NLRC5
rs72775186	Imp	16	57114612	A	G	0.05	1.76	3.37088e-05	0.06	0.965	0.599117	0.053	1.45	0.003604	NLRC5
rs76724798	Imp	16	60801010	A	T	0.06	0.59	0.000965322	0.059	1.147	0.693391	0.06	0.79	0.01971	GOT2/CDH8
rs80258398	Imp	16	64396625	A	G	0.129	0.66	0.000990526	0.13	0.889	0.985908	0.129	0.75	0.01043	CDH8/CDH11
rs72784567	Imp	16	65802899	T	C	0.09	1.47	0.000503224	0.076	1.531	0.00980818	0.086	1.49	1.491e-05	CDH11/CDH5
rs73592272	Imp	16	65930347	T	G	0.077	1.67	0.000147535	0.076	0.703	0.162323	0.077	1.29	0.03644	CDH11/CDH5
rs32854	Imp	16	69068340	A	C	0.448	0.79	0.000544423	0.445	1.064	0.257964	0.447	0.88	0.04608	TANGO6
rs2033251	Imp	16	71460372	A	G	0.136	0.69	0.00034724	0.134	0.904	0.341344	0.135	0.77	0.0007032	CALB2/ZNF23
rs172649	Imp	16	71596005	T	G	0.67	0.77	0.000234993	0.661	0.935	0.855606	0.668	0.82	0.002821	ZNF19
rs72795125	Imp	16	72981088	A	G	0.387	1.27	0.00082537	0.391	0.944	0.383542	0.388	1.14	0.03864	ZFHX3
rs2550683	Geno	16	79085534	G	T	0.667	0.79	0.000307596	0.689	1.044	0.985004	0.674	0.87	0.004998	WWOX
rs28639441	Imp	16	79857655	G	A	0.131	0.67	0.000511566	0.12	0.901	0.528431	0.128	0.75	0.001886	MAF/DYNLRB2
rs4392062	Imp	16	81763386	C	A	0.128	1.49	6.16992e-05	0.135	1.079	0.782355	0.13	1.33	0.0009608	CMIP/PLCG2
rs67191023	Imp	16	82026710	T	C	0.109	1.55	0.000590842	0.107	0.869	0.592767	0.109	1.29	0.01879	7SK/SDR42E1
rs58802563	Imp	16	84045699	G	T	0.057	0.48	0.000388407	0.059	0.989	0.688244	0.057	0.68	0.01171	SLC38A8
rs8049209	Imp	16	84130286	G	C	0.058	1.58	0.000212061	0.062	1.228	0.250667	0.059	1.44	0.0003054	MBTPS1
rs7191488	Imp	16	86724122	G	C	0.471	0.72	4.48898e-06	0.483	0.914	0.527184	0.475	0.79	6.949e-05	FOXL1/C16orf95
rs9931938	Imp	16	87272970	C	T	0.423	0.77	2.83662e-05	0.446	1.169	0.158798	0.43	0.9	0.01685	C16orf95
rs78674489	Imp	17	218708	T	C	0.061	1.49	0.000514362	0.062	0.851	0.515962	0.062	1.27	0.02104	RPH3AL
rs9892794	Imp	17	3532930	A	G	0.066	0.52	0.000715657	0.069	0.681	0.18893	0.067	0.58	0.0005338	SHPK/SHPK
rs62069957	Imp	17	3579282	C	T	0.051	1.77	0.000444118	0.041	0.831	0.764228	0.048	1.46	0.01058	P2RX5-TAX1BP3/P2RX5
rs4796540	Imp	17	6594322	A	G	0.196	0.72	0.00096999	0.213	1.581	2.14927e-05	0.202	1	0.9394	SLC13A5
rs2642158	Imp	17	7630301	G	C	0.36	1.31	0.000256879	0.37	1.078	0.200014	0.363	1.22	0.0002568	DNAH2
rs2242374	Imp	17	8701116	A	G	0.083	1.42	0.000415826	0.09	0.881	0.572072	0.086	1.2	0.0162	MFSD6L
rs12946239	Imp	17	11344047	C	T	0.498	0.76	0.000214954	0.504	1.155	0.204753	0.5	0.89	0.03583	SHISA6
rs9904383	Imp	17	11385522	A	T	0.303	1.41	3.74587e-05	0.284	1.029	0.562771	0.297	1.26	0.0003415	SHISA6
rs62054360	Imp	17	13603720	T	C	0.084	1.47	0.00089285	0.085	1.006	0.808513	0.084	1.3	0.006026	HS3ST3A1/COX10
rs9914630	Geno	17	14601455	T	C	0.785	1.38	0.000868928	0.784	1.004	0.779198	0.785	1.22	0.01527	HS3ST3B1/CDRT7
rs60642043	Imp	17	16413012	G	T	0.186	1.39	0.000214034	0.192	1.124	0.306424	0.188	1.28	0.0004153	FAM211A/ZNF287
rs9899364	Imp	17	17567112	A	G	0.586	0.78	0.000159858	0.563	1.139	0.277465	0.578	0.9	0.02316	PEMT/SMCR2
rs1860190	Imp	17	32576573	A	T	0.352	0.74	0.000174233	0.351	0.889	0.217837	0.352	0.79	0.0002143	ASIC2/CCL2
rs62074688	Imp	17	36640471	G	A	0.338	1.37	0.000753084	0.328	0.841	0.29781	0.335	1.16	0.0475	ARHGAP23
rs9913335	Imp	17	48568816	T	C	0.555	1.3	0.000300681	0.572	0.984	0.49302	0.561	1.17	0.0166	RSAD1/MYCBPAP
rs995340	Geno	17	52303311	A	C	0.609	0.8	0.000330806	0.596	0.957	0.740346	0.605	0.85	0.002604	KIF2B/TOM1L1
rs7214302	Geno	17	59429189	G	A	0.224	1.33	0.000176335	0.218	1.087	0.272215	0.222	1.24	0.0003	BCAS3
rs2905444	Imp	17	67632198	A	T	0.553	1.22	0.000870064	0.557	1.067	0.906418	0.554	1.16	0.007493	MAP2K6/KCNJ16
rs16977302	Geno	17	70627430	A	C	0.198	0.7	0.000724591	0.191	0.901	0.77228	0.195	0.77	0.004789	SOX9/SLC39A11
rs74826202	Imp	17	72043533	A	G	0.098	1.39	0.000796891	0.094	1.133	0.382562	0.097	1.29	0.001551	SDK2/RPL38
rs820196	Geno	17	73627539	C	T	0.219	1.35	0.000248448	0.222	0.926	0.767574	0.22	1.2	0.002316	RECQL5
rs61160858	Imp	17	74913447	T	C	0.099	0.65	0.000707613	0.096	1.331	0.0706827	0.098	0.89	0.1293	MGAT5B
rs35712603	Imp	17	75809244	A	C	0.265	1.29	0.000763027	0.271	1.16	0.235744	0.267	1.24	0.0007532	40057/TNRC6C
rs58821976	Imp	18	1046827	T	C	0.177	0.71	0.000572297	0.171	0.973	0.920747	0.175	0.8	0.005913	ADCYAP1/METTL4
rs8096995	Geno	18	4376022	C	A	0.169	0.69	0.000663244	0.177	0.87	0.492426	0.171	0.76	0.002017	DLGAP1
rs1917916	Geno	18	5750932	A	G	0.886	1.59	0.000515226	0.895	1.178	0.362647	0.888	1.41	0.001035	EPB41L3/TMEM200C
rs4349228	Geno	18	7383538	G	A	0.339	1.23	0.000897762	0.321	1.104	0.322339	0.333	1.18	0.001319	LRRC30/PTPRM
rs11662730	Imp	18	13790877	G	C	0.874	0.65	0.000990371	0.873	0.84	0.284877	0.874	0.71	0.001195	RNMT/MC5R
rs4292018	Imp	18	20702129	G	C	0.518	1.37	0.000140897	0.544	0.976	0.659399	0.527	1.2	0.00116	RBBP8/CABLES1
rs6506935	Imp	18	29222804	T	C	0.325	0.78	0.000701778	0.324	1.029	0.880479	0.325	0.87	0.006126	B4GALT6
rs8083910	Imp	18	29610063	G	A	0.111	0.62	0.000309138	0.108	1.314	0.0927414	0.11	0.87	0.07703	RNF125
rs77169990	Imp	18	41214033	T	C	0.053	1.66	0.000233	0.049	0.811	0.314995	0.052	1.35	0.02462	SYT4/SETBP1
rs11660385	Imp	18	42422156	A	G	0.075	0.66	0.00075571	0.071	0.891	0.920354	0.074	0.75	0.007068	SETBP1
rs66781087	Imp	18	47212159	A	G	0.523	1.31	7.61025e-05	0.53	1.04	0.614038	0.525	1.2	0.005513	LIPG/ACAA2
rs7506177	Geno	18	47229252	T	C	0.355	1.37	7.61269e-06	0.349	0.979	0.906018	0.353	1.21	0.0006208	LIPG/ACAA2
rs1676075	Imp	18	49223639	T	C	0.342	0.76	0.000229304	0.315	0.971	0.694234	0.333	0.83	0.001788	MEX3C/DCC
rs72926660	Imp	18	49671741	A	C	0.119	1.39	0.000285236	0.124	0.919	0.654864	0.12	1.21	0.01062	MEX3C/DCC
rs4294893	Imp	18	52762988	G	A	0.615	0.73	0.000495	0.618	0.978	0.915729	0.616	0.81	0.00532	CCDC68/TCF4
rs12964116	Geno	18	61442619	G	A	0.05	1.9	5.73263e-06	0.051	1.685	0.00935233	0.05	1.82	2.393e-07	SERPINB7
rs1243064	Imp	18	61513975	A	T	0.259	1.48	4.29655e-07	0.253	1.065	0.201069	0.257	1.31	2.064e-06	SERPINB7/SERPINB2
rs557512	Imp	18	62893102	G	A	0.61	0.74	4.00021e-05	0.626	1.07	0.21172	0.615	0.84	0.01516	SERPINB8/CDH7
rs11664796	Imp	18	63009510	C	T	0.065	1.57	6.8011e-05	0.055	0.92	0.40967	0.062	1.36	0.009419	SERPINB8/CDH7
rs9952736	Imp	18	65619115	G	A	0.743	0.76	0.000554966	0.753	1.099	0.615496	0.746	0.86	0.01716	DSEL/TMX3
rs560645	Imp	18	65927790	A	G	0.399	1.26	0.000778255	0.393	1.042	0.494412	0.397	1.18	0.002277	DSEL/TMX3
rs1790584	Imp	18	67470469	A	G	0.524	1.33	0.000202093	0.54	1	0.505169	0.529	1.19	0.01289	DOK6
rs1790946	Imp	18	67528430	T	C	0.526	1.33	9.58167e-05	0.526	1.07	0.596935	0.526	1.23	0.0007322	CD226
rs9319821	Imp	18	69322497	T	G	0.668	0.79	0.000498935	0.678	1.001	0.723967	0.671	0.86	0.003284	GTSCR1/CBLN2
rs9953802	Imp	18	69340619	C	G	0.89	0.64	0.000156196	0.899	0.68	0.0453063	0.893	0.65	2.631e-05	GTSCR1/CBLN2
rs7240390	Imp	18	71093514	A	T	0.112	1.35	0.000820418	0.112	0.995	0.782052	0.112	1.22	0.005333	RP11-169F17.1/FBXO15
rs7237624	Imp	18	74261446	G	A	0.866	0.66	1.93771e-05	0.859	0.998	0.945735	0.864	0.76	0.0007266	ZNF516/ZNF236
rs470793	Imp	18	74716083	C	T	0.088	1.53	0.000341305	0.104	1.113	0.567239	0.093	1.36	0.001605	MBP
rs1051978	Geno	18	77170477	A	C	0.099	1.48	0.000179814	0.093	0.711	0.149214	0.097	1.2	0.04284	NFATC1
rs349311	Geno	19	954701	C	T	0.88	0.72	0.000259739	0.87	0.923	0.647318	0.877	0.79	0.001697	ARID3A
rs76861062	Imp	19	1802942	T	C	0.05	1.65	0.000109074	0.044	0.814	0.264951	0.048	1.38	0.02	ATP8B3
rs11085023	Geno	19	3571446	A	G	0.544	1.3	0.000919611	0.562	0.988	0.808935	0.55	1.17	0.01478	MFSD12
rs112835547	Imp	19	3585334	T	C	0.106	1.47	0.000507344	0.112	0.997	0.865234	0.107	1.29	0.009059	HMG20B/GIPC3
rs8108253	Geno	19	4656466	C	T	0.249	0.72	0.000610192	0.236	1.395	0.0141613	0.245	0.94	0.2521	C19orf10
rs72986530	Imp	19	6630656	A	C	0.158	1.35	0.0004038	0.17	0.983	0.9254	0.162	1.21	0.006835	CD70/TNFSF14
rs10407491	Imp	19	9104899	A	G	0.171	0.6	3.89139e-05	0.179	1.106	0.463067	0.174	0.78	0.005866	MUC16/OR1M1
rs8111456	Imp	19	11301147	G	A	0.353	1.4	1.31553e-05	0.347	0.772	0.0152597	0.351	1.14	0.05892	KANK2
rs4072516	Imp	19	14725135	T	G	0.337	0.79	0.000769154	0.347	0.832	0.326884	0.34	0.8	0.001197	CLEC17A/EMR3
rs656864	Imp	19	20846817	A	G	0.229	0.73	0.000107798	0.226	0.878	0.582465	0.228	0.79	0.0007572	ZNF626/ZNF66
rs12979207	Imp	19	21326123	C	T	0.091	1.75	0.000189531	0.091	1.027	0.8146	0.091	1.47	0.005621	ZNF431
rs78220951	Imp	19	23402877	G	T	0.083	1.64	0.000884444	0.085	0.798	0.0916456	0.084	1.31	0.1226	ZNF730/ZNF91
rs4932856	Imp	19	23648027	A	G	0.858	1.49	0.000965722	0.849	0.755	0.050716	0.855	1.1	0.1745	ZNF91/ZNF675
rs2190801	Geno	19	28451369	T	C	0.563	0.76	0.000140649	0.554	1.066	0.539503	0.56	0.86	0.009581	UQCRFS1
rs45450692	Imp	19	40971977	G	A	0.094	0.6	0.000851742	0.09	0.803	0.325931	0.093	0.67	0.001288	BLVRB/SPTBN4
rs16974961	Geno	19	41600054	T	G	0.075	1.67	9.17219e-05	0.064	1.001	0.72704	0.071	1.44	0.001063	CYP2A13
rs10402508	Imp	19	45733782	C	G	0.647	1.24	0.000769359	0.639	1.009	0.97735	0.645	1.15	0.009065	MARK4/EXOC3L2
rs7508101	Imp	19	48280954	C	A	0.94	0.63	0.000916861	0.942	1.043	0.865756	0.94	0.73	0.013	GLTSCR2/SEPW1
rs73046529	Imp	19	51266454	T	C	0.096	0.52	0.000476128	0.093	1.06	0.816091	0.095	0.71	0.009771	CLEC11A/GPR32
rs890842	Imp	19	52840962	T	C	0.773	0.76	0.000126784	0.761	1.029	0.965817	0.769	0.85	0.003008	ZNF610
rs4801946	Imp	19	53528619	G	T	0.369	1.31	0.000992455	0.374	1.061	0.845575	0.371	1.21	0.00707	ERVV-1/ERVV-2
rs521267	Imp	20	934133	C	T	0.742	0.76	0.000462041	0.738	0.713	0.000152595	0.74	0.75	3.4e-07	ANGPT4/RSPO4
rs3810561	Imp	20	3211064	C	A	0.707	0.74	0.00051946	0.718	0.884	0.333392	0.71	0.79	0.000917	SLC4A11
rs404678	Geno	20	5024237	T	C	0.615	1.33	0.000187436	0.638	0.994	0.695825	0.622	1.19	0.007504	SLC23A2/TMEM230
rs355524	Imp	20	6399875	T	C	0.814	1.52	0.000260072	0.811	1.132	0.350961	0.813	1.35	0.0005923	FERMT1/CASC20
rs6085861	Imp	20	7059197	T	C	0.656	0.75	0.000713023	0.648	0.965	0.712788	0.654	0.82	0.004059	BMP2/HAO1
rs1033858	Imp	20	16027182	T	A	0.135	0.63	0.000352492	0.125	1.1	0.350778	0.132	0.79	0.02721	MACROD2
rs17664036	Geno	20	21220212	C	T	0.059	1.61	0.000314932	0.062	1.262	0.211272	0.06	1.48	0.0003248	PLK1S1
rs2424607	Imp	20	23969193	C	T	0.878	1.47	0.000865763	0.887	0.993	0.591993	0.881	1.26	0.02338	GGTLC1
rs1291142	Imp	20	35525362	G	A	0.695	0.76	0.000668413	0.661	0.972	0.339841	0.684	0.83	0.00114	SAMHD1
rs75380092	Imp	20	39588837	T	C	0.207	0.71	0.000567565	0.235	1.048	0.522726	0.216	0.84	0.001993	MAFB/TOP1
rs3092523	Imp	20	40590750	T	A	0.651	1.38	3.74187e-05	0.659	1.181	0.108924	0.654	1.3	2.429e-05	CHD6/PTPRT
rs75294030	Imp	20	46882542	C	T	0.07	1.61	0.000392265	0.077	1.344	0.104087	0.072	1.51	0.0001543	SULF2/PREX1
rs2273102	Imp	20	47589122	C	T	0.246	1.42	0.000114675	0.231	1.083	0.914867	0.241	1.29	0.002072	ARFGEF2
rs13039591	Imp	20	50402269	A	G	0.282	0.74	0.000305923	0.283	0.86	0.414729	0.283	0.79	0.0008709	SALL4
rs73136798	Imp	20	50586438	C	A	0.076	1.51	0.000802549	0.082	0.832	0.401152	0.078	1.25	0.03626	SALL4/ZFP64
rs62208305	Imp	20	51910366	G	A	0.096	0.62	0.000473014	0.101	0.974	0.740107	0.098	0.76	0.01163	TSHZ2
rs1321862	Imp	20	55642483	A	T	0.66	1.25	0.000504865	0.664	0.856	0.154331	0.662	1.08	0.06764	TFAP2C/BMP7
rs4809497	Imp	20	61781705	A	G	0.476	0.75	0.000328981	0.46	1.001	0.976828	0.471	0.84	0.005318	HAR1A/YTHDF1
rs1757703	Geno	20	62141509	G	A	0.145	1.45	0.000178765	0.139	1.14	0.256837	0.143	1.33	0.000278	EEF1A2/PPDPF
rs2826843	Imp	21	22815080	A	T	0.165	1.32	0.0006339	0.168	1.047	0.589107	0.166	1.22	0.01973	NCAM2
rs2257678	Imp	21	25780193	T	A	0.229	1.34	0.000173502	0.218	1.197	0.0716634	0.226	1.29	4.959e-05	NCAM2/7SK
rs2834181	Geno	21	34680395	A	C	0.453	1.38	1.52787e-05	0.452	1.134	0.211787	0.452	1.28	3.215e-05	IL10RB/IFNAR1
rs75307789	Imp	21	40874522	G	C	0.065	0.49	0.000290447	0.064	1.019	0.886339	0.064	0.68	0.006121	SH3BGR
rs2837872	Imp	21	42283632	G	A	0.561	0.75	0.000562226	0.551	1.051	0.900542	0.558	0.85	0.008892	DSCAM-IT1/BACE2
rs117759739	Imp	21	43672214	A	G	0.054	0.5	0.000773178	0.056	1.178	0.192336	0.055	0.76	0.06995	ABCG1
rs35873421	Imp	21	43694730	A	G	0.226	1.41	0.000596877	0.222	1.02	0.97471	0.224	1.26	0.007773	ABCG1
rs507270	Imp	21	44750328	C	A	0.699	0.82	0.000807054	0.705	1.115	0.740621	0.701	0.92	0.01594	CRYAA/SIK1
rs14313	Imp	21	45756015	T	C	0.213	0.69	0.000882265	0.232	1.182	0.32813	0.219	0.87	0.04692	C21orf2
rs4822582	Imp	22	25629434	C	G	0.788	0.7	0.000458706	0.783	1.055	0.805996	0.787	0.81	0.009781	CRYBB2/LRP5L
rs9613140	Imp	22	26639167	G	T	0.088	1.41	0.000344592	0.093	0.898	0.5399	0.089	1.22	0.01582	SEZ6L
rs12484048	Imp	22	34490624	T	C	0.206	0.64	7.63025e-05	0.191	1.178	0.228387	0.201	0.83	0.0194	LARGE-IT1/ISX
rs12628016	Imp	22	35437824	T	C	0.124	1.4	0.000851731	0.124	1.075	0.976273	0.124	1.28	0.008693	LARGE-IT1/ISX
rs5750761	Geno	22	39575692	A	C	0.596	1.29	0.000862134	0.571	1.09	0.190188	0.588	1.21	0.0006247	CBX7/PDGFB
rs5751174	Imp	22	42280135	A	G	0.119	0.63	0.000206617	0.13	0.904	0.806166	0.123	0.74	0.002275	SREBF2
rs9623589	Imp	22	42817652	G	T	0.285	0.76	0.000820835	0.278	0.958	0.647258	0.282	0.83	0.003743	NFAM1
rs13058539	Imp	22	45962522	T	C	0.058	1.59	0.000790539	0.063	0.715	0.106448	0.06	1.22	0.1066	FBLN1
rs74612506	Imp	22	48333787	G	A	0.056	1.63	0.000586933	0.06	1.119	0.316284	0.057	1.44	0.0009302	TBC1D22A/FAM19A5
rs117385458	Imp	22	48629468	G	C	0.106	1.51	5.04115e-05	0.117	0.918	0.656587	0.11	1.27	0.003868	TBC1D22A/FAM19A5
rs5770779	Imp	22	50876235	C	T	0.726	1.31	0.000710908	0.749	0.974	0.776973	0.733	1.17	0.004785	PPP6R2
GOFA, Genetics of Food Allergy study; EA, effect allele; AA, alternative allele; AF, effect allele frequency; OR, odds ratio.
a Genomic positions were based on human genome reference assembly GRCh37.p13.

## Sheet: SupplementaryData1b
Supplementary Data 1b Top associated loci (P < 1 x 10-3 in the discovery set) for hen’s egg allergy
Hen’s egg allergy						GOFA discovery set			GOFA replication set			Meta-analysis
SNP ID	Status	Chr	Positiona	EA	AA	AF	OR	P value	AF	OR	P value	AF	OR	P value	Gene region
rs1926445	Imp	1	7595706	T	A	0.074	1.82	0.000185299	0.065	0.983	0.74174	0.071	1.56	0.006121	CAMTA1
rs10779706	Imp	1	8986682	T	G	0.891	0.65	0.000454615	0.875	1.318	0.253308	0.886	0.81	0.03963	ENO1-IT1/CA6
rs34897790	Imp	1	9063871	T	C	0.113	1.66	0.000490403	0.111	1.074	0.535959	0.112	1.44	0.001766	SLC2A7
rs12731530	Imp	1	11557170	G	C	0.128	1.54	0.000984294	0.12	1.107	0.240059	0.126	1.39	0.0009032	PTCHD2
rs12132752	Imp	1	14473223	T	C	0.104	0.47	0.00016933	0.103	0.79	0.248414	0.104	0.59	0.0002395	PRDM2/KAZN
rs9783012	Imp	1	15335548	T	C	0.084	1.55	0.000245598	0.07	0.741	0.598619	0.08	1.27	0.01036	KAZN
rs113734202	Imp	1	17355896	T	G	0.055	0.33	0.000152848	0.053	1.018	0.983317	0.054	0.62	0.002985	SDHB
rs3763583	Imp	1	17565414	C	G	0.115	0.54	0.000258896	0.117	1.138	0.417118	0.116	0.76	0.01744	PADI1
rs34745135	Imp	1	22442171	C	G	0.116	1.63	0.000353216	0.101	0.99	0.935539	0.112	1.41	0.005708	CDC42-IT1/WNT4
rs35142741	Imp	1	22494153	T	C	0.159	1.48	0.000742188	0.154	0.988	0.573026	0.157	1.29	0.002662	WNT4/ZBTB40
rs11581153	Imp	1	26689185	G	A	0.099	1.53	0.000473086	0.103	1.022	0.41909	0.101	1.34	0.00115	ZNF683
rs16833316	Geno	1	30604682	C	T	0.053	0.43	0.000703912	0.048	0.71	0.292963	0.051	0.53	0.0009117	PTPRU/MATN1
rs55964611	Imp	1	41300690	A	G	0.051	1.8	0.000191702	0.063	0.892	0.91021	0.055	1.45	0.002638	KCNQ4
rs76512741	Imp	1	42260379	T	C	0.124	1.49	0.000436441	0.129	0.842	0.226598	0.125	1.25	0.04287	HIVEP3
rs55808147	Imp	1	44535643	A	G	0.118	0.53	0.000458781	0.116	1.148	0.690998	0.117	0.76	0.01192	SLC6A9/KLF17
rs2136122	Imp	1	48009069	A	T	0.085	1.43	0.000814086	0.086	1.346	0.0494874	0.085	1.39	0.0001194	FOXD2/TRABD2B
rs17103715	Imp	1	48214623	T	C	0.19	1.47	0.000148315	0.197	1.161	0.841715	0.193	1.36	0.001864	FOXD2/TRABD2B
rs2281598	Imp	1	57395434	G	C	0.138	1.68	0.000158158	0.147	1.049	0.696743	0.141	1.45	0.006231	C8B
rs706484	Imp	1	57428680	C	T	0.298	1.42	0.000909963	0.299	1.092	0.933109	0.298	1.3	0.007717	C8B
rs12729555	Imp	1	62285269	T	C	0.084	1.71	0.000180407	0.076	0.92	0.590838	0.081	1.44	0.008837	INADL
rs2840677	Imp	1	66333877	T	A	0.532	1.4	0.000330764	0.511	0.838	0.0656873	0.525	1.15	0.09039	PDE4B
rs10890066	Imp	1	74171786	G	T	0.339	1.34	0.00089071	0.343	1.015	0.900754	0.34	1.21	0.007059	NEGR1-IT1/LRRIQ3
rs79930336	Imp	1	84398359	A	T	0.207	0.62	0.000129407	0.193	1.098	0.468079	0.203	0.79	0.01024	TTLL7
rs2892934	Imp	1	87037398	T	C	0.054	2.21	0.000171404	0.057	0.583	0.121097	0.055	1.58	0.04502	CLCA4
rs282011	Imp	1	91858207	T	C	0.296	1.45	0.000238	0.299	1.033	0.98766	0.297	1.29	0.003917	HFM1
rs10875290	Imp	1	100853755	T	G	0.414	0.71	0.000362833	0.404	0.948	0.695729	0.41	0.8	0.002293	CDC14A
rs17026160	Imp	1	111133168	C	G	0.054	1.88	1.47966e-05	0.053	0.857	0.995121	0.054	1.53	0.0006546	KCNA10/KCNA2
rs2255089	Imp	1	111773568	C	G	0.445	1.36	0.000426978	0.445	1.019	0.848553	0.445	1.23	0.003825	CHI3L2
rs1496044	Imp	1	152144275	A	G	0.14	0.58	0.000162599	0.132	0.564	0.0314281	0.138	0.57	1.74e-05	RPTN/HRNR
rs12123821	Imp	1	152179152	T	C	0.058	2.67	7.03537e-08	0.06	2.89	1.69996e-05	0.058	2.74	5.363e-12	RPTN/HRNR
rs6666753	Imp	1	158736215	A	G	0.92	0.66	0.000847214	0.903	1.24	0.393837	0.914	0.81	0.03549	OR6N1
rs7546296	Imp	1	159304186	C	T	0.647	0.75	0.000998724	0.655	1.109	0.928802	0.65	0.86	0.01118	OR10J3/OR10J1
rs17379471	Imp	1	164328922	C	G	0.091	1.65	0.000574616	0.102	1.202	0.647358	0.095	1.48	0.002755	NUF2/PBX1
rs1891737	Geno	1	164928753	C	A	0.266	0.69	0.000104998	0.266	0.803	0.194898	0.266	0.73	0.0001164	PBX1/LMX1A
rs2420505	Imp	1	169728137	G	A	0.209	1.39	0.00051947	0.214	1.223	0.314538	0.211	1.33	0.0007991	C1orf112/SELE
rs2050151	Geno	1	170958464	G	A	0.608	0.71	0.000499706	0.613	0.912	0.435631	0.61	0.78	0.001273	MROH9
rs4657807	Imp	1	195452987	G	A	0.44	0.73	0.000507591	0.435	0.849	0.228613	0.438	0.77	0.0005012	B3GALT2/KCNT2
rs674085	Imp	1	201588940	G	A	0.169	1.46	0.000956755	0.169	1.12	0.867887	0.169	1.33	0.006853	CSRP1/NAV1
rs71635579	Imp	1	202293379	G	A	0.201	1.43	0.000272723	0.208	1.367	0.26436	0.203	1.4	0.0003786	LGR6/UBE2T
rs3001253	Imp	1	203530875	C	T	0.532	0.78	0.000860456	0.523	0.901	0.402499	0.529	0.82	0.001686	OPTC/ATP2B4
rs72743666	Imp	1	203537401	T	C	0.075	2.04	0.000228584	0.071	0.715	0.32368	0.074	1.58	0.02177	OPTC/ATP2B4
rs2576260	Imp	1	217005105	T	G	0.643	0.72	0.000243395	0.65	0.913	0.5225	0.645	0.78	0.001024	ESRRG
rs12029460	Imp	1	217064861	C	A	0.104	1.6	0.00050547	0.114	0.97	0.779357	0.107	1.34	0.003593	ESRRG
rs2221067	Imp	1	219077163	C	A	0.424	1.35	0.000151121	0.432	0.983	0.773848	0.426	1.21	0.00157	C1orf143/LYPLAL1
rs12141207	Geno	1	219273881	G	A	0.475	1.37	0.000334728	0.469	1.309	0.0199387	0.473	1.34	2.052e-05	C1orf143/LYPLAL1
rs6668784	Imp	1	221954793	T	C	0.134	0.62	0.000691986	0.133	0.875	0.428535	0.134	0.71	0.001578	DUSP10/HHIPL2
rs61824292	Imp	1	229551601	C	G	0.051	1.91	0.000411817	0.05	1.193	0.648768	0.051	1.67	0.002193	CCSAP/ACTA1
rs34363891	Imp	1	229721260	G	A	0.212	1.5	0.000280567	0.225	0.914	0.412246	0.216	1.27	0.01848	ABCB10/TAF5L
rs10925683	Imp	1	238717148	A	G	0.065	1.91	0.000122429	0.058	1.002	0.618162	0.063	1.61	0.0008607	ZP4/CHRM3
rs12738180	Imp	1	239210687	G	A	0.498	1.42	0.000464505	0.498	0.915	0.087501	0.498	1.21	0.08836	ZP4/CHRM3
rs2090689	Imp	1	242146145	T	A	0.465	1.38	0.000131899	0.473	1.032	0.993696	0.467	1.24	0.002563	EXO1/MAP1LC3C
rs112585026	Imp	1	244926387	A	G	0.107	1.53	0.000976134	0.107	0.834	0.456022	0.107	1.27	0.03254	DESI2/COX20
rs7522091	Imp	1	245116298	G	A	0.491	0.71	0.000578898	0.48	0.854	0.551249	0.488	0.76	0.002087	HNRNPU/EFCAB2
rs10924735	Imp	1	246621043	A	G	0.264	1.46	0.000700072	0.254	0.965	0.575187	0.261	1.27	0.02011	SMYD3
rs62114506	Imp	2	242793	C	G	0.275	0.65	8.89555e-05	0.27	0.918	0.305001	0.273	0.74	0.0002003	SH3YL1
rs11885848	Imp	2	1074217	T	C	0.62	1.51	5.86127e-05	0.621	0.846	0.292611	0.62	1.21	0.01186	SNTG2
rs72773097	Imp	2	2668326	A	G	0.225	1.56	5.87575e-05	0.239	0.989	0.750644	0.229	1.33	0.0007788	MYT1L/TSSC1
rs2385206	Imp	2	2671683	G	A	0.536	0.74	0.000587093	0.524	1.189	0.116578	0.532	0.87	0.08178	MYT1L/TSSC1
rs11895724	Imp	2	4494928	C	T	0.086	1.73	0.000154951	0.088	0.494	0.0230214	0.086	1.29	0.1144	DCDC2C/SOX11
rs2709591	Geno	2	9496291	C	T	0.582	1.48	8.10545e-05	0.595	1.112	0.565686	0.586	1.33	0.000544	ASAP2
rs4668681	Imp	2	10540228	A	C	0.075	1.63	0.000393452	0.088	1.068	0.497431	0.079	1.43	0.001329	HPCAL1
rs12692481	Geno	2	12585080	C	T	0.214	1.53	5.93395e-06	0.211	0.968	0.666907	0.213	1.32	0.0009611	LPIN1/TRIB2
rs7583338	Imp	2	15035627	C	A	0.094	1.72	2.91839e-05	0.1	1.08	0.895256	0.096	1.48	0.0007432	FAM84A/NBAS
rs1427681	Imp	2	16150975	A	G	0.393	0.72	0.000283619	0.406	0.871	0.42538	0.397	0.77	0.000808	MYCN/FAM49A
rs13007912	Imp	2	22787130	C	A	0.371	1.51	0.000301704	0.369	0.883	0.444808	0.37	1.26	0.01753	TDRD15/KLHL29
rs6736999	Imp	2	29387572	A	G	0.08	1.75	0.000567637	0.073	1.382	0.034663	0.078	1.62	5.916e-05	CLIP4
rs479103	Geno	2	30969468	C	T	0.854	0.7	0.000954094	0.857	0.695	0.12912	0.855	0.7	0.0004045	CAPN13
rs956747	Geno	2	31374733	G	A	0.279	1.4	0.000268633	0.257	0.901	0.642533	0.272	1.22	0.009769	GALNT14
rs1816151	Geno	2	34291679	G	A	0.343	1.31	0.00048953	0.345	0.766	0.0346573	0.344	1.1	0.1486	FAM98A/CRIM1
rs13429165	Imp	2	36206466	C	T	0.12	0.61	0.000885508	0.106	1.449	0.0122373	0.116	0.89	0.2825	FAM98A/CRIM1
rs1978646	Imp	2	38103548	A	G	0.059	1.83	0.000457769	0.056	0.763	0.544733	0.058	1.45	0.01699	CDC42EP3/RMDN2
rs113178171	Imp	2	42261683	T	C	0.091	1.63	8.85336e-05	0.095	1.02	0.468657	0.092	1.4	0.0004093	C2orf91/PKDCC
rs34556076	Imp	2	45515714	G	A	0.238	1.34	0.000605431	0.25	0.84	0.235821	0.241	1.15	0.0488	SIX2/SRBD1
rs7558342	Geno	2	46015851	G	T	0.497	0.74	0.000533343	0.485	1.109	0.679263	0.493	0.86	0.0134	PRKCE
rs1813508	Imp	2	48207277	C	T	0.277	1.42	0.000630463	0.29	1.155	0.275999	0.281	1.31	0.0007699	FBXO11/FOXN2
rs62137005	Imp	2	48571416	T	C	0.266	1.38	0.000759928	0.273	1.152	0.583012	0.268	1.29	0.002788	FOXN2
rs11885974	Geno	2	53428270	G	A	0.094	1.7	0.000269236	0.09	0.693	0.0978174	0.093	1.34	0.06441	NRXN1/SCARNA16
rs11903677	Imp	2	53435027	G	T	0.743	1.57	2.26743e-05	0.736	0.79	0.141148	0.74	1.17	0.01509	NRXN1/SCARNA16
rs56347232	Imp	2	59401658	T	C	0.284	1.39	0.000898159	0.295	1.007	0.375901	0.288	1.24	0.03848	FANCL/BCL11A
rs1896293	Imp	2	60718848	T	G	0.379	0.73	0.000671467	0.366	1.016	0.810631	0.375	0.83	0.01137	BCL11A
rs78464281	Imp	2	62636941	C	T	0.088	1.55	0.000169823	0.1	0.949	0.559075	0.092	1.32	0.009281	B3GNT2/TMEM17
rs72805586	Imp	2	62726887	T	C	0.16	1.45	0.000331227	0.166	1.502	0.00807964	0.162	1.47	8.225e-06	B3GNT2/TMEM17
rs4142761	Imp	2	67269976	T	C	0.103	1.59	0.000512677	0.101	1.04	0.937279	0.102	1.42	0.005358	MEIS1/ETAA1
rs4484063	Imp	2	69170841	G	C	0.824	0.71	0.000702182	0.831	1.455	0.156818	0.826	0.87	0.0724	BMP10/GKN2
rs35600361	Imp	2	72105349	T	G	0.135	1.41	0.000782762	0.136	0.979	0.770418	0.135	1.25	0.01368	DYSF/CYP26B1
rs17434855	Imp	2	74055697	C	T	0.062	1.76	0.000290571	0.053	0.829	0.470002	0.059	1.47	0.01601	C2orf78/STAMBP
rs80286660	Imp	2	76507420	G	A	0.075	0.44	0.000452213	0.078	1.141	0.425682	0.076	0.74	0.0231	GCFC2/LRRTM4
rs10865426	Imp	2	76948804	T	A	0.894	0.63	0.000954489	0.894	1.025	0.785334	0.894	0.74	0.01493	GCFC2/LRRTM4
rs1434111	Imp	2	80103956	G	T	0.793	1.47	0.000849173	0.786	0.99	0.733932	0.791	1.25	0.004553	CTNNA2
rs7592817	Imp	2	81262539	T	C	0.41	1.38	0.000546559	0.42	1.082	0.651916	0.413	1.26	0.002695	LRRTM1
rs6547600	Imp	2	85447830	T	C	0.411	0.71	4.0976e-05	0.411	0.97	0.955317	0.411	0.8	0.001094	TCF7L1
rs56254758	Imp	2	85516217	A	C	0.154	0.53	8.53056e-05	0.149	0.591	0.0318855	0.152	0.55	1.002e-05	TCF7L1
rs72825675	Imp	2	112784753	C	T	0.096	0.55	0.000932141	0.1	1.25	0.290918	0.098	0.82	0.05041	MERTK
rs4848978	Geno	2	112816047	C	T	0.716	0.74	0.000498853	0.715	1.13	0.69132	0.716	0.86	0.01251	TMEM87B
rs12476426	Imp	2	123240194	C	T	0.078	1.71	0.000229692	0.075	0.649	0.415406	0.077	1.35	0.01641	TSN/CNTNAP5
rs11897702	Imp	2	123389709	T	C	0.359	1.48	5.06236e-05	0.365	1.005	0.566545	0.361	1.29	0.0003924	TSN/CNTNAP5
rs9784001	Imp	2	129478625	G	A	0.117	1.65	3.28955e-06	0.121	1.34	0.149759	0.118	1.54	5.33e-06	HS6ST1/RAB6C
rs62167653	Imp	2	133128280	A	G	0.083	0.45	0.000644391	0.074	1.082	0.788206	0.08	0.66	0.004331	FAM201B/GPR39
rs10803532	Geno	2	133253928	G	A	0.879	0.66	0.000261945	0.898	0.956	0.816222	0.885	0.73	0.002543	GPR39
rs961360	Geno	2	136393658	G	A	0.182	1.31	0.000360267	0.19	1.345	0.0710991	0.185	1.32	8.783e-05	R3HDM1
rs60294795	Imp	2	137329934	T	C	0.075	0.49	0.000645798	0.068	0.85	0.384198	0.073	0.62	0.001268	CXCR4/THSD7B
rs1518802	Imp	2	141934936	A	C	0.59	1.56	2.55451e-05	0.574	0.979	0.954913	0.585	1.3	0.0008063	LRP1B
rs115567304	Imp	2	142090147	G	A	0.066	1.84	0.000586355	0.068	0.904	0.770719	0.067	1.48	0.01147	LRP1B
rs10928203	Geno	2	144632311	G	A	0.234	1.41	0.000385731	0.241	1.19	0.142172	0.237	1.33	0.0002155	ARHGAP15/GTDC1
rs183287052	Imp	2	145033781	A	T	0.073	1.98	6.41221e-05	0.079	1.162	0.55941	0.075	1.68	0.0004518	GTDC1
rs114962240	Imp	2	152177412	A	G	0.09	1.54	0.000679375	0.097	0.834	0.79527	0.092	1.25	0.01186	NMI/TNFAIP6
rs6715902	Geno	2	152201469	C	A	0.655	0.76	0.000464423	0.65	1.174	0.409112	0.653	0.88	0.02455	NMI/TNFAIP6
rs58258096	Imp	2	154781125	A	T	0.055	1.78	0.000836684	0.061	1.015	0.891096	0.057	1.46	0.006622	GALNT13
rs1823002	Geno	2	155605132	T	C	0.859	0.71	0.000764453	0.854	1.247	0.50568	0.858	0.85	0.02506	KCNJ3
rs11691923	Imp	2	157246935	G	A	0.451	0.72	0.00045048	0.451	1.079	0.82448	0.451	0.84	0.008621	NR4A2/GPD2
rs1227132	Imp	2	168409393	T	C	0.374	1.41	0.000384074	0.362	1.018	0.671492	0.37	1.25	0.002229	XIRP2/B3GALT1
rs1105265	Geno	2	172715401	C	T	0.151	1.48	0.000595398	0.138	0.941	0.904849	0.147	1.28	0.008519	SLC25A12
rs3828342	Imp	2	173333199	A	G	0.175	1.51	0.00032464	0.153	1.235	0.232513	0.168	1.41	0.0003612	ITGA6
rs149894026	Imp	2	175168654	T	C	0.1	0.48	0.000115731	0.109	1.106	0.54205	0.103	0.73	0.007802	OLA1/SP9
rs62185280	Imp	2	178931473	T	C	0.369	0.71	7.40014e-05	0.349	0.948	0.589686	0.362	0.79	0.0005531	PDE11A
rs3820979	Imp	2	179368982	C	A	0.327	0.72	0.000531255	0.323	0.925	0.529186	0.326	0.79	0.001831	PLEKHA3
rs1040228	Geno	2	181980885	G	A	0.721	1.5	0.000225047	0.726	1.01	0.434614	0.723	1.27	0.0007066	UBE2E3/ITGA4
rs17198983	Geno	2	190447811	T	C	0.554	0.78	0.000815241	0.563	1.135	0.370219	0.557	0.89	0.03712	SLC40A1
rs75046744	Imp	2	192721089	C	A	0.05	1.87	0.000762452	0.049	0.865	0.462335	0.05	1.53	0.02793	SDPR/TMEFF2
rs2280451	Geno	2	196661774	G	A	0.084	1.5	0.000832169	0.1	1.249	0.137142	0.089	1.4	0.0003881	DNAH7
rs72914638	Imp	2	197341558	C	G	0.051	1.99	0.000404065	0.049	0.688	0.776396	0.051	1.55	0.009025	HECW2
rs35629855	Imp	2	205039086	T	A	0.486	1.33	0.000943778	0.486	0.974	0.654715	0.486	1.19	0.01987	ICOS/PARD3B
rs12989722	Imp	2	206206098	C	A	0.056	1.76	6.38407e-05	0.071	0.52	0.0313078	0.061	1.32	0.06841	PARD3B
rs12694023	Imp	2	206251867	C	T	0.867	0.59	7.86919e-05	0.855	1.276	0.19564	0.864	0.75	0.02076	PARD3B
rs7596783	Imp	2	209035224	A	G	0.083	1.71	0.000111761	0.089	0.981	0.537809	0.085	1.43	0.0006203	C2orf80
rs62191934	Imp	2	214905694	G	A	0.317	1.38	0.000713499	0.311	1.087	0.838828	0.315	1.27	0.005257	SPAG16
rs11895383	Imp	2	215027417	T	C	0.204	1.4	0.000338857	0.231	0.975	0.618759	0.213	1.24	0.01187	SPAG16
rs57068798	Imp	2	218491575	A	G	0.097	1.57	0.000358297	0.089	1.093	0.774103	0.094	1.41	0.008435	DIRC3
rs1519483	Imp	2	222521870	T	C	0.287	0.63	0.000290249	0.293	1.037	0.997937	0.289	0.76	0.004293	EPHA4/PAX3
rs1250907	Imp	2	224441197	C	T	0.925	0.62	0.000606278	0.916	1.052	0.390946	0.922	0.73	0.001242	KCNE4/SCG2
rs10195162	Imp	2	230545455	T	C	0.794	0.69	0.000409978	0.792	1.002	0.734447	0.793	0.79	0.002771	DNER
rs73086893	Imp	2	232636228	A	G	0.071	1.73	0.000773193	0.074	1.462	0.174768	0.072	1.64	0.0004934	PDE6D
rs34091485	Imp	2	236507971	G	A	0.193	0.63	0.000334315	0.181	1.075	0.948398	0.189	0.78	0.005346	AGAP1
rs13382236	Geno	2	238800874	C	T	0.072	1.72	2.84141e-05	0.081	0.893	0.775627	0.075	1.42	0.0005158	RAMP1
rs73094328	Imp	2	238807655	T	C	0.071	1.84	0.000119844	0.068	0.92	0.685476	0.07	1.52	0.005437	RAMP1
rs62191094	Imp	2	239834947	A	T	0.089	0.52	0.000996414	0.092	1.086	0.758265	0.09	0.75	0.01627	TWIST2/HDAC4
rs34211035	Imp	2	242708443	C	A	0.168	0.62	0.000681917	0.165	0.897	0.737461	0.167	0.71	0.003953	D2HGDH/GAL3ST2
rs1472025	Imp	3	1171644	A	C	0.188	0.63	0.00012236	0.182	0.83	0.360631	0.186	0.7	0.0003322	CNTN6
rs17661459	Imp	3	11791277	C	G	0.217	1.54	6.72825e-05	0.198	1.25	0.243477	0.211	1.44	0.0001144	VGLL4/TAMM41
rs871972	Geno	3	14730645	T	C	0.311	0.72	0.000432873	0.315	0.772	0.043493	0.313	0.74	5.925e-05	C3orf20
rs4685243	Imp	3	15317608	G	A	0.318	1.33	0.00079411	0.312	1.037	0.766436	0.316	1.22	0.004723	SH3BP5
rs77154532	Imp	3	19377311	G	A	0.365	1.43	9.35807e-05	0.369	1.031	0.924682	0.366	1.27	0.001718	KCNH8
rs7632181	Imp	3	19408850	A	G	0.214	0.65	0.000723055	0.217	1.204	0.0726508	0.215	0.86	0.1196	KCNH8
rs11918612	Geno	3	21647537	G	A	0.405	1.37	0.000749814	0.412	1.121	0.691933	0.407	1.27	0.003744	ZNF385D
rs9844739	Geno	3	24190184	A	G	0.158	0.63	0.00036167	0.142	1.109	0.256404	0.153	0.81	0.03488	THRB
rs9809389	Geno	3	28132490	A	G	0.426	0.71	0.000548008	0.408	1.042	0.908283	0.42	0.82	0.008023	EOMES/CMC1
rs9810960	Imp	3	32465749	G	A	0.051	2.04	4.8052e-05	0.051	1.17	0.271355	0.051	1.69	0.0001047	CMTM7
rs74866853	Imp	3	33267345	T	C	0.079	1.73	0.000382567	0.079	1.031	0.505778	0.079	1.47	0.001339	SUSD5/FBXL2
rs73060459	Imp	3	38765476	A	C	0.05	1.58	0.000971615	0.05	1.02	0.619185	0.05	1.39	0.02192	SCN10A
rs62244070	Imp	3	38798171	T	C	0.252	0.75	0.000405963	0.252	0.982	0.599409	0.252	0.84	0.001879	SCN10A
rs62261638	Imp	3	39844963	G	A	0.309	0.69	0.000734962	0.301	1.189	0.338327	0.307	0.85	0.03853	MOBP/MYRIP
rs1049667	Imp	3	46623690	A	C	0.356	0.7	8.85179e-05	0.337	0.741	0.0355338	0.35	0.72	1.171e-05	TDGF1
rs62263577	Imp	3	47884003	A	T	0.069	2.07	8.9411e-07	0.075	1.465	0.152718	0.071	1.86	2.023e-06	DHX30
rs72624841	Imp	3	54036155	A	G	0.056	1.74	0.000235833	0.062	0.766	0.319947	0.058	1.35	0.02241	SELK/CACNA2D3
rs1344671	Imp	3	54795064	C	T	0.26	1.39	0.000360962	0.256	0.922	0.763689	0.259	1.21	0.002747	CACNA2D3
rs1872488	Imp	3	56125726	A	G	0.305	1.43	0.000140618	0.302	1.104	0.438873	0.304	1.3	0.00051	ERC2
rs12632941	Imp	3	56829663	C	T	0.83	1.59	0.000821287	0.83	1.085	0.949006	0.83	1.36	0.009444	ARHGEF3
rs674993	Imp	3	61726404	T	C	0.751	0.62	6.06964e-06	0.745	0.851	0.221017	0.749	0.68	1.58e-05	PTPRG
rs80168360	Imp	3	62045322	G	A	0.071	1.86	0.000153816	0.08	1.092	0.411291	0.074	1.55	0.0004881	PTPRG
rs1996919	Imp	3	63380726	C	G	0.082	1.66	0.000757177	0.072	1.621	0.0604159	0.079	1.65	0.0001391	SYNPR
rs9849009	Imp	3	63484490	A	C	0.2	0.61	0.000183371	0.212	0.925	0.96648	0.204	0.73	0.002956	SYNPR
rs1576397	Imp	3	67583706	A	T	0.788	0.68	0.000532391	0.778	1.05	0.646824	0.784	0.79	0.01445	SUCLG2
rs6782170	Imp	3	71952217	C	A	0.929	0.58	0.000134877	0.927	0.878	0.903442	0.929	0.66	0.002061	PROK2/RYBP
rs77166467	Imp	3	72756294	G	A	0.07	2.1	0.00028439	0.077	1.268	0.376295	0.072	1.77	0.0006653	RYBP/SHQ1
rs35796547	Imp	3	74432399	G	A	0.469	0.71	0.000731516	0.468	0.996	0.570596	0.469	0.8	0.002616	CNTN3
rs73121908	Imp	3	78237666	A	C	0.059	1.65	0.000521904	0.063	0.671	0.241562	0.06	1.3	0.04434	ROBO2/ROBO1
rs150212674	Imp	3	84279433	C	T	0.054	0.39	0.000965574	0.051	0.564	0.215464	0.053	0.46	0.000772	GBE1/CADM2
rs523062	Imp	3	95062807	C	G	0.414	0.68	8.15634e-05	0.419	0.882	0.323677	0.415	0.75	0.0002063	NSUN3/EPHA6
rs28685614	Imp	3	100575408	G	C	0.278	0.69	0.000164362	0.296	0.927	0.441516	0.284	0.78	0.000577	ABI3BP
rs709546	Imp	3	107074780	T	C	0.845	0.64	4.62867e-05	0.84	1.095	0.374008	0.843	0.76	0.007799	CBLB/CCDC54
rs6797831	Imp	3	108463025	A	G	0.171	0.66	0.000510513	0.162	0.845	0.211458	0.168	0.73	0.0004531	RETNLB
rs12487296	Imp	3	112623514	A	G	0.409	0.73	0.000935496	0.428	1.018	0.943519	0.415	0.83	0.01039	CD200R1L/CD200R1
rs2718425	Geno	3	114205687	A	G	0.644	0.69	0.000730622	0.636	1.092	0.505147	0.641	0.81	0.02446	ZBTB20
rs11927538	Imp	3	115287824	T	A	0.084	1.97	4.37973e-05	0.082	0.806	0.706251	0.084	1.53	0.002824	ZBTB20/GAP43
rs9834125	Imp	3	118997939	G	A	0.242	0.7	0.000598011	0.259	1.222	0.0339908	0.247	0.88	0.1624	B4GALT4/ARHGAP31
rs34246651	Imp	3	123664105	C	T	0.634	0.72	0.000754038	0.624	1.038	0.748705	0.631	0.82	0.004359	CCDC14
rs4679219	Geno	3	125931750	A	G	0.341	0.67	0.000127361	0.344	0.923	0.32056	0.342	0.76	0.0002837	U1/KLF15
rs13075960	Imp	3	126806203	T	C	0.877	1.83	0.00048745	0.878	1.102	0.97544	0.877	1.44	0.005678	PLXNA1/C3orf56
rs13059854	Geno	3	129463537	C	T	0.066	1.72	0.000344798	0.071	0.881	0.3342	0.068	1.44	0.02616	TMCC1
rs6788064	Imp	3	143476411	G	A	0.49	0.74	0.000274492	0.49	0.999	0.880375	0.49	0.83	0.005558	SLC9A9
rs72993346	Imp	3	143530497	G	A	0.231	1.45	0.000337793	0.251	1.179	0.362928	0.237	1.34	0.0007151	SLC9A9
rs7611328	Imp	3	150974684	A	G	0.797	1.59	0.000523345	0.801	0.864	0.407107	0.798	1.25	0.02635	MED12L/P2RY14
rs60800951	Imp	3	167455701	C	A	0.224	1.48	0.000801461	0.224	0.781	0.288051	0.224	1.21	0.04707	SERPINI1
rs1273601	Imp	3	169893535	A	G	0.924	0.53	3.97706e-05	0.931	1.772	0.0483409	0.926	0.68	0.04343	PHC3
rs34403570	Imp	3	171063189	C	A	0.245	1.39	0.000537774	0.247	0.93	0.732015	0.246	1.21	0.0119	TNIK
rs9812048	Imp	3	175833245	A	G	0.156	0.6	0.00028598	0.152	1.056	0.835009	0.155	0.77	0.002831	NAALADL2/TBL1XR1
rs12108097	Imp	3	175937467	A	G	0.218	1.4	0.000411236	0.219	0.879	0.602262	0.218	1.2	0.01384	NAALADL2/TBL1XR1
rs1003410	Imp	3	186006349	G	T	0.518	0.67	0.00044669	0.525	0.986	0.747072	0.521	0.77	0.01027	DGKG
rs480129	Imp	3	189890860	C	G	0.156	0.56	0.000370121	0.156	0.91	0.94899	0.156	0.69	0.004459	LEPREL1/CLDN1
rs9985290	Imp	3	190862777	G	A	0.681	0.73	0.000906994	0.681	0.938	0.514805	0.681	0.79	0.002573	GMNC/OSTN
rs2030513	Imp	3	192020346	G	A	0.155	1.47	0.000959692	0.174	1.127	0.535359	0.161	1.34	0.002857	FGF12
rs62289923	Imp	3	194755911	A	G	0.255	0.66	0.000677053	0.237	1.398	0.192996	0.249	0.89	0.06083	FAM43A/XXYLT1
rs62292087	Imp	3	194765190	C	G	0.069	0.39	0.000442825	0.07	0.816	0.563949	0.069	0.56	0.001793	FAM43A/XXYLT1
rs28754530	Imp	3	196359707	T	C	0.154	0.59	0.000405132	0.172	1.095	0.577371	0.16	0.79	0.0146	FBXO45/NRROS
rs192390521	Imp	3	196851156	A	T	0.05	1.88	0.000489075	0.044	1.409	0.401229	0.048	1.74	0.001101	DLG1
rs77892061	Imp	4	1346903	A	G	0.054	0.34	0.0001982	0.05	1.159	0.41988	0.052	0.65	0.01494	UVSSA
rs1263446	Geno	4	2816300	G	A	0.092	1.59	0.000754427	0.089	1.216	0.530535	0.091	1.45	0.002366	SH3BP2
rs2748779	Imp	4	3718817	A	C	0.836	1.58	0.000724915	0.836	0.962	0.75346	0.836	1.29	0.004295	LRPAP1/ADRA2C
rs4017772	Imp	4	5427961	A	G	0.059	1.85	0.000535688	0.058	1.021	0.217163	0.058	1.54	0.0004879	STK32B
rs7697730	Geno	4	6324246	G	A	0.583	1.36	0.000308911	0.568	0.874	0.656885	0.578	1.15	0.01024	PPP2R2C
rs6817164	Geno	4	8086655	T	C	0.3	0.74	0.000660061	0.303	1.158	0.420766	0.301	0.88	0.0288	ABLIM2
rs16842416	Imp	4	8508108	T	C	0.078	1.85	3.57299e-05	0.076	1.155	0.609954	0.077	1.61	0.0003571	TRMT44/GPR78
rs3096594	Imp	4	14165436	A	G	0.59	1.39	0.000224836	0.589	1.135	0.177619	0.589	1.29	0.0001866	BOD1L1/CPEB2
rs28729737	Imp	4	14169197	G	A	0.054	1.72	7.70904e-05	0.056	0.918	0.489535	0.054	1.46	0.000401	BOD1L1/CPEB2
rs35705152	Imp	4	16836059	C	T	0.184	1.45	0.000852544	0.191	1.088	0.70414	0.186	1.32	0.004226	LDB2
rs78571832	Imp	4	22255067	A	C	0.09	0.45	0.000763919	0.09	1.023	0.702199	0.09	0.67	0.003898	KCNIP4/GPR125
rs4596226	Imp	4	25729569	A	G	0.1	1.42	0.00072136	0.105	1.041	0.820161	0.102	1.29	0.01163	SLC34A2/SEL1L3
rs78742340	Imp	4	25966757	T	C	0.148	1.7	6.43148e-05	0.138	0.867	0.729861	0.145	1.39	0.003337	SMIM20/RBPJ
rs7668273	Geno	4	27172128	G	A	0.344	1.46	3.66145e-05	0.335	0.853	0.317787	0.341	1.22	0.008399	STIM2
rs11722885	Imp	4	27250047	G	T	0.166	1.46	0.00034152	0.166	0.938	0.681981	0.166	1.27	0.01022	STIM2
rs79314999	Imp	4	28698958	G	A	0.059	1.73	0.000728631	0.068	0.974	0.496999	0.062	1.43	0.002073	STIM2/PCDH7
rs6819205	Imp	4	28744750	G	A	0.519	1.35	0.000449149	0.525	0.914	0.853553	0.521	1.17	0.008042	STIM2/PCDH7
rs59111564	Imp	4	31787027	A	G	0.053	1.87	0.000995437	0.045	1.58	0.0449249	0.051	1.78	0.000129	PCDH7
rs7676875	Imp	4	36356672	C	T	0.592	0.64	9.96419e-06	0.584	1.283	0.0666722	0.589	0.82	0.01879	DTHD1/KIAA1239
rs7699780	Imp	4	37723334	C	T	0.813	1.7	0.000218205	0.814	1.159	0.883255	0.813	1.43	0.004783	RELL1/PGM2
rs75974675	Imp	4	37758470	C	A	0.074	0.48	0.000746249	0.068	0.849	0.594807	0.072	0.62	0.002849	RELL1/PGM2
rs17616434	Geno	4	38812876	C	T	0.226	0.68	0.000794368	0.214	1.016	0.382873	0.222	0.8	0.03533	TLR1
rs10000000	Imp	4	40088896	T	A	0.068	1.63	0.000327128	0.075	0.693	0.400758	0.07	1.31	0.02078	N4BP2
rs78008486	Imp	4	40254743	T	C	0.06	1.69	0.00074072	0.061	0.651	0.585817	0.06	1.3	0.02025	RHOH/CHRNA9
rs35076440	Imp	4	43801972	T	C	0.279	0.67	0.000382165	0.282	0.941	0.6237	0.28	0.77	0.001935	GRXCR1/KCTD8
rs1948315	Imp	4	44273304	T	A	0.132	0.53	9.25299e-05	0.118	1.225	0.300086	0.127	0.77	0.01466	KCTD8
rs17711073	Imp	4	55978160	C	T	0.078	1.52	0.000743428	0.074	0.828	0.670531	0.077	1.28	0.01664	KDR
rs62308307	Imp	4	58002890	A	G	0.082	1.79	0.000925255	0.071	1.054	0.571895	0.079	1.54	0.003105	IGFBP7
rs72636329	Imp	4	58804723	G	A	0.235	0.67	0.000463785	0.231	0.816	0.266087	0.234	0.72	0.0005762	IGFBP7
rs10030755	Imp	4	62844408	C	A	0.225	0.6	6.73556e-05	0.208	1.149	0.217707	0.219	0.79	0.01734	LPHN3
rs7660676	Imp	4	63307772	G	A	0.118	1.65	0.00019207	0.126	1.015	0.87597	0.121	1.41	0.004497	LPHN3/TECRL
rs78777533	Imp	4	75607107	A	T	0.445	0.73	0.000991538	0.482	0.834	0.11367	0.456	0.77	0.0003594	AREGB/BTC
rs13134119	Imp	4	77009175	A	G	0.285	1.34	0.000985436	0.283	1.141	0.209015	0.284	1.26	0.0007545	ART3
rs4585291	Imp	4	82612964	G	T	0.543	1.48	0.000242011	0.547	1.244	0.0645322	0.544	1.39	5.579e-05	RASGEF1B
rs58157871	Imp	4	84275731	G	A	0.107	1.57	0.000563932	0.116	0.802	0.128031	0.11	1.29	0.07537	HPSE/HELQ
rs1187212	Geno	4	87603929	G	A	0.061	1.91	7.01899e-05	0.062	1.131	0.665378	0.061	1.63	0.0006794	PTPN13
rs112254168	Imp	4	87973163	G	C	0.074	1.7	0.000354011	0.083	0.747	0.226266	0.077	1.35	0.03865	AFF1
rs28537716	Imp	4	89169478	G	T	0.861	0.63	8.90636e-05	0.852	0.826	0.165659	0.858	0.69	8.13e-05	ABCG2/PPM1K
rs55996516	Imp	4	90060902	G	A	0.188	1.36	0.000543162	0.179	1.01	0.905141	0.185	1.23	0.005152	TIGD2/GPRIN3
rs17023017	Imp	4	96025094	G	T	0.122	1.54	0.000642509	0.113	1.871	0.000218253	0.119	1.65	6.833e-07	BMPR1B
rs265062	Imp	4	96369670	G	A	0.656	0.72	0.000548509	0.66	0.916	0.762126	0.657	0.79	0.003633	UNC5C
rs4339221	Imp	4	97991729	C	G	0.313	0.65	0.000110376	0.303	0.959	0.895959	0.31	0.75	0.003029	PDHA2/STPG2
rs10019880	Imp	4	100989615	G	A	0.092	0.52	0.000228586	0.086	0.973	0.875189	0.09	0.7	0.005021	H2AFZ/DDIT4L
rs649653	Imp	4	105518376	G	A	0.306	0.66	0.000165781	0.301	1.026	0.579024	0.304	0.78	0.00868	CXXC4/TET2
rs56275507	Imp	4	112522436	C	G	0.573	1.45	0.000504706	0.566	0.91	0.30612	0.571	1.21	0.03495	PITX2/C4orf32
rs35878351	Imp	4	119989522	G	A	0.12	0.64	0.000997576	0.121	1.114	0.925405	0.12	0.8	0.01126	SYNPO2/MYOZ2
rs10033707	Imp	4	121708442	G	T	0.335	1.59	1.43393e-05	0.35	1.161	0.483014	0.34	1.42	0.0001184	PRDM5
rs2306416	Geno	4	122617688	C	T	0.139	0.56	0.000237892	0.144	0.733	0.139527	0.14	0.63	0.0001419	ANXA5
rs67393611	Imp	4	126588925	T	C	0.052	1.85	0.000191469	0.043	1.18	0.93416	0.049	1.66	0.002802	FAT4/INTU
rs9307594	Imp	4	128094309	G	A	0.498	1.37	0.000125566	0.495	0.904	0.118756	0.497	1.16	0.03947	FAT4/INTU
rs6814193	Imp	4	130489078	A	G	0.538	1.43	0.000151645	0.542	0.825	0.248304	0.539	1.16	0.02306	C4orf33
rs2280501	Imp	4	141045673	C	G	0.37	0.66	0.000538251	0.39	0.763	0.0497991	0.376	0.7	8.333e-05	MAML3
rs559072	Geno	4	149734385	G	A	0.07	1.73	0.000308815	0.077	1.337	0.207439	0.072	1.58	0.0002965	NR3C2/DCLK2
rs6843959	Imp	4	152764822	T	C	0.511	1.38	0.000885774	0.506	1.068	0.93142	0.509	1.25	0.007553	PET112/FBXW7
rs361170	Imp	4	152785618	T	C	0.439	1.47	0.00043134	0.43	1.181	0.426058	0.436	1.36	0.001103	PET112/FBXW7
rs869039	Imp	4	153955273	G	C	0.413	1.31	0.000509108	0.412	1.044	0.65939	0.412	1.21	0.002619	FHDC1/TRIM2
rs111476154	Imp	4	155036071	T	C	0.123	0.54	0.000330162	0.117	0.804	0.321416	0.121	0.64	0.0005843	SFRP2/DCHS2
rs142324738	Imp	4	157028578	C	A	0.32	0.7	0.000863578	0.329	0.863	0.474082	0.323	0.76	0.002176	CTSO/PDGFC
rs2561455	Imp	4	160970793	G	A	0.511	1.38	0.00077591	0.517	1.211	0.188568	0.513	1.31	0.0005452	RAPGEF2/FSTL5
rs7687051	Imp	4	162249291	C	T	0.305	0.71	0.0008979	0.337	0.959	0.981607	0.315	0.8	0.008548	RAPGEF2/FSTL5
rs113049184	Imp	4	162315548	T	C	0.254	0.66	0.000144324	0.268	0.928	0.437983	0.259	0.76	0.0005179	FSTL5
rs76789950	Imp	4	163588940	C	A	0.056	1.73	0.00095382	0.059	0.901	0.720008	0.057	1.41	0.01725	FSTL5/NAF1
rs72697377	Imp	4	166955340	C	T	0.135	0.57	0.000332894	0.145	0.754	0.243679	0.138	0.64	0.0003933	TLL1
rs35882894	Imp	4	169609086	T	A	0.176	1.42	0.000981005	0.182	1.108	0.711667	0.178	1.31	0.004748	PALLD
rs7682426	Geno	4	169779025	C	T	0.222	1.42	0.0006185	0.21	1.194	0.180686	0.218	1.34	0.0004297	PALLD
rs13146886	Imp	4	171396874	T	C	0.069	1.72	0.000286319	0.069	1.134	0.904862	0.069	1.52	0.005381	AADAT/GALNTL6
rs1394856	Imp	4	172974435	T	A	0.912	0.6	0.000734338	0.908	0.696	0.0623179	0.91	0.63	0.0001402	GALNTL6
rs1841090	Imp	4	180776412	C	T	0.746	0.72	0.000142919	0.727	1.116	0.655271	0.74	0.84	0.006524	AGA/TENM3
rs6552719	Geno	4	184841111	T	C	0.272	1.38	0.000786184	0.289	0.923	0.907558	0.278	1.21	0.01008	STOX2
rs4862439	Geno	4	185781300	C	T	0.722	1.46	0.000333897	0.724	0.821	0.29148	0.722	1.17	0.02959	ACSL1/HELT
rs4862729	Imp	4	187668040	G	A	0.595	0.7	0.000590141	0.586	0.814	0.196643	0.592	0.74	0.000462	FAT1/ZFP42
rs7696076	Imp	4	189862346	G	A	0.296	0.72	0.000112374	0.296	0.907	0.515236	0.296	0.79	0.0005756	TRIML1/FRG1
rs75682979	Imp	4	189886769	A	G	0.086	1.61	0.000944672	0.089	1.133	0.740159	0.087	1.44	0.004976	TRIML1/FRG1
rs6870326	Imp	5	2636855	T	C	0.547	1.43	5.31071e-05	0.532	0.934	0.561075	0.543	1.22	0.004728	IRX4/IRX2
rs1661109	Imp	5	3162030	T	C	0.931	2.16	0.000507523	0.924	1.418	0.206012	0.929	1.77	0.0004356	C5orf38/IRX1
rs13974	Imp	5	6669000	G	A	0.177	0.58	5.46795e-05	0.188	0.782	0.396342	0.181	0.66	0.0002153	SRD5A1
rs2619915	Imp	5	9161347	A	G	0.678	0.65	0.000442049	0.674	0.856	0.308362	0.677	0.72	0.0006862	SEMA5A
rs160498	Imp	5	9616992	A	C	0.626	0.7	0.000122056	0.619	1.125	0.461361	0.624	0.83	0.01011	SEMA5A/TAS2R1
rs1875214	Imp	5	18281357	C	A	0.777	0.71	0.000920413	0.772	0.923	0.765035	0.776	0.78	0.005204	BASP1/CDH18
rs9293147	Imp	5	24662174	C	T	0.732	0.7	3.93379e-05	0.712	0.948	0.415056	0.726	0.78	0.0001838	CDH10/CDH9
rs113829457	Imp	5	27120060	C	T	0.157	0.52	6.38685e-05	0.146	0.726	0.16524	0.154	0.59	6.23e-05	CDH9
rs113377511	Imp	5	30481326	A	G	0.134	0.59	0.000744327	0.136	0.864	0.386451	0.135	0.7	0.001423	CDH6
rs62349125	Imp	5	31684760	G	A	0.211	0.66	0.000779655	0.213	0.986	0.952202	0.212	0.78	0.009071	PDZD2
rs1494655	Imp	5	32962245	T	A	0.354	1.35	0.000863918	0.37	0.989	0.996502	0.359	1.21	0.008624	NPR3/TARS
rs268744	Imp	5	33297881	G	A	0.571	1.4	0.000805901	0.582	1.142	0.574381	0.575	1.29	0.002834	NPR3/TARS
rs2088077	Geno	5	37556926	G	A	0.532	0.72	0.000650556	0.529	0.88	0.155201	0.531	0.78	0.0003691	WDR70
rs650118	Imp	5	39293111	C	T	0.092	1.7	0.000855512	0.097	1.089	0.728545	0.094	1.44	0.004513	C9
rs696766	Imp	5	39356126	G	A	0.944	2.35	0.000702123	0.927	1.021	0.94227	0.939	1.48	0.006655	C9
rs71631481	Imp	5	49878319	C	T	0.068	1.94	6.10913e-05	0.067	1.33	0.176263	0.068	1.71	6.595e-05	EMB/PARP8
rs13162201	Geno	5	50174547	A	G	0.062	1.84	3.42719e-05	0.07	1.188	0.472977	0.065	1.59	0.0002111	PARP8/ISL1
rs78464352	Imp	5	52196261	A	G	0.056	1.84	8.21485e-05	0.06	1.221	0.43654	0.057	1.62	0.0003422	ITGA1
rs16887892	Imp	5	57437672	T	C	0.146	0.56	0.000329864	0.143	0.877	0.365682	0.145	0.68	0.0007107	ACTBL2/PLK2
rs59119617	Imp	5	57439957	G	A	0.111	0.56	0.00048938	0.102	0.736	0.254911	0.108	0.62	0.0005658	ACTBL2/PLK2
rs115627623	Imp	5	60955488	G	T	0.065	1.87	9.06632e-05	0.067	1.02	0.823161	0.066	1.56	0.003227	C5orf64
rs17225368	Imp	5	66594355	A	T	0.098	0.46	0.000243194	0.094	1.25	0.31422	0.097	0.74	0.02322	CD180/PIK3R1
rs73119301	Imp	5	68442164	A	G	0.147	1.57	9.14653e-05	0.147	1.224	0.302233	0.147	1.44	0.0002016	SLC30A5/CCNB1
rs10042595	Geno	5	72579933	A	G	0.617	0.7	0.000221478	0.611	0.912	0.25338	0.615	0.77	0.0003032	TMEM174/FOXD1
rs114298347	Imp	5	79153087	A	G	0.06	1.85	0.000588696	0.056	0.96	0.740374	0.058	1.53	0.01233	CMYA5/MTX3
rs4703527	Geno	5	81063925	G	A	0.071	0.43	0.000760992	0.071	0.609	0.215635	0.071	0.5	0.0006389	SSBP2/ATG10
rs13168731	Geno	5	82971512	A	G	0.5	1.41	0.000230044	0.494	1.009	0.980347	0.498	1.25	0.003902	HAPLN1
rs72769535	Imp	5	99366518	T	G	0.197	0.59	0.000101031	0.209	0.855	0.32012	0.201	0.69	0.0002379	CHD1/FAM174A
rs6594322	Imp	5	107941267	C	A	0.477	0.73	0.000643113	0.493	0.895	0.63399	0.482	0.79	0.00287	FBXL17/FER
rs2195366	Imp	5	113012671	G	C	0.546	1.48	0.000174312	0.55	0.961	0.558824	0.547	1.27	0.0009113	YTHDC2/KCNN2
rs6884666	Imp	5	113205328	T	C	0.063	1.72	5.08648e-05	0.061	0.995	0.676506	0.063	1.49	0.003346	YTHDC2/KCNN2
rs11952413	Imp	5	129672078	G	A	0.086	1.62	0.000148554	0.086	1.074	0.96485	0.086	1.43	0.00257	CHSY3/HINT1
rs848	Geno	5	131996500	C	A	0.759	0.6	1.6724e-08	0.75	0.733	0.0492247	0.756	0.64	1.548e-08	IL13
rs4425499	Imp	5	132049062	G	A	0.705	0.61	1.92056e-09	0.686	0.639	0.000109889	0.699	0.62	1.142e-12	KIF3A
rs248539	Imp	5	141149655	A	G	0.604	0.74	0.000263594	0.605	0.962	0.678471	0.604	0.81	0.001753	ARAP3/PCDH1
rs77073849	Imp	5	141721719	T	C	0.052	2.24	2.86248e-05	0.06	0.816	0.725457	0.054	1.68	0.002076	SPRY4/FGF1
rs2190783	Imp	5	144057729	A	C	0.273	0.68	0.000266067	0.271	1.171	0.366774	0.273	0.85	0.02057	KCTD16/PRELID2
rs76265449	Imp	5	149395760	A	G	0.073	1.63	0.000690542	0.091	1.112	0.977893	0.079	1.42	0.007918	HMGXB3
rs2748218	Imp	5	149908171	G	A	0.791	0.68	0.000485113	0.785	1.177	0.32044	0.789	0.82	0.03271	NDST1
rs153843	Imp	5	156139644	G	T	0.844	0.65	0.000217772	0.843	0.857	0.584287	0.843	0.71	0.001157	SGCD
rs284439	Geno	5	156172418	T	C	0.863	0.6	2.00786e-05	0.868	1.158	0.824591	0.865	0.72	0.001274	SGCD
rs752267	Imp	5	159341113	T	C	0.06	1.79	0.000225415	0.056	0.798	0.950176	0.058	1.44	0.004147	IL12B/ADRA1B
rs17501698	Geno	5	160375241	C	T	0.123	1.55	0.000361321	0.136	1.166	0.901215	0.127	1.41	0.003905	ATP10B/GABRB2
rs10515857	Imp	5	162809963	A	G	0.105	1.7	3.25187e-05	0.107	1.15	0.968753	0.105	1.51	0.0009782	GABRG2/CCNG1
rs488607	Imp	5	163139605	A	G	0.796	0.75	0.000988423	0.802	0.888	0.240501	0.798	0.79	0.0009084	MAT2B
rs2914338	Imp	5	170745203	C	A	0.828	0.64	0.000186338	0.81	1.092	0.431318	0.822	0.76	0.01396	TLX3/NPM1
rs73323772	Imp	5	174680033	C	G	0.081	1.71	0.000504971	0.085	0.839	0.224065	0.082	1.4	0.04656	MSX2/DRD1
rs634501	Geno	5	180218668	G	A	0.741	0.71	0.000742004	0.757	0.84	0.12854	0.746	0.75	0.0003262	MGAT1
rs55928464	Imp	5	180660447	C	G	0.052	0.4	0.000370954	0.044	1.519	0.134938	0.05	0.83	0.05974	TRIM41
rs58002243	Imp	6	867611	A	G	0.098	1.57	0.000327772	0.108	1.035	0.874729	0.101	1.36	0.003428	HUS1B/FOXQ1
rs318436	Imp	6	2879441	G	C	0.492	0.73	0.000153074	0.501	0.763	0.205851	0.495	0.74	0.000169	SERPINB1/SERPINB9
rs35958400	Imp	6	3995398	A	G	0.078	1.48	0.000257091	0.09	1.21	0.4766	0.082	1.38	0.0009087	FAM50B/PRPF4B
rs10458092	Imp	6	6571262	C	T	0.371	0.66	8.72869e-05	0.386	0.98	0.60626	0.376	0.77	0.005562	F13A1/LY86
rs35466223	Imp	6	10583003	C	G	0.155	1.48	0.000384457	0.169	1.024	0.719146	0.159	1.32	0.01003	GCNT2
rs6456563	Imp	6	10596606	G	T	0.545	0.73	0.00021066	0.537	1.044	0.838914	0.542	0.84	0.002334	GCNT2
rs9349459	Geno	6	13111241	A	G	0.308	1.4	0.000294767	0.332	0.814	0.169136	0.316	1.17	0.04509	PHACTR1
rs114735690	Imp	6	19666971	A	G	0.054	2.17	6.00695e-05	0.057	1.582	0.0722243	0.055	1.95	1.972e-05	RNF144B/ID4
rs113469268	Imp	6	27665312	T	C	0.07	1.82	0.000835548	0.071	1.859	0.0172371	0.071	1.83	4.155e-05	TRNAI6/HIST1H2BL
rs1264306	Imp	6	30882203	C	T	0.558	0.66	2.85886e-05	0.563	0.872	0.393169	0.56	0.73	0.0001325	VARS2
NA	Imp	6	31292602	T	C	0.274	0.65	0.000164634	0.25	1.089	0.456725	0.267	0.79	0.0006121	HLA-C/HLA-B
rs154973	Geno	6	32900642	T	C	0.086	1.75	0.000268828	0.077	0.939	0.420748	0.083	1.47	0.0007631	TAP1/HLA-DMB
rs181997	Geno	6	32900718	A	G	0.328	1.35	0.000334212	0.316	0.871	0.371061	0.324	1.16	0.02296	TAP1/HLA-DMB
rs13204294	Imp	6	41624157	A	C	0.11	1.58	0.000753602	0.105	1.006	0.790536	0.109	1.38	0.01277	MDFI/TFEB
rs73464404	Imp	6	46020394	A	G	0.158	0.65	0.000438786	0.157	0.886	0.553217	0.158	0.74	0.001723	CLIC5
rs1738834	Imp	6	47118692	T	C	0.128	1.52	0.000454748	0.125	1.154	0.259947	0.127	1.39	0.0005492	GPR110/TNFRSF21
rs9296664	Imp	6	51688071	G	A	0.41	0.74	0.000106949	0.402	1.004	0.38417	0.408	0.83	0.0119	PKHD1
rs4715655	Imp	6	57193366	T	C	0.609	0.71	0.00063415	0.618	1.172	0.13412	0.612	0.84	0.07708	PRIM2
rs9294122	Geno	6	63893492	A	G	0.285	1.46	0.000196633	0.27	1.096	0.662393	0.28	1.33	0.001367	KHDRBS2/FKBP1C
rs72884618	Imp	6	64348621	C	T	0.061	0.42	0.000199606	0.072	0.799	0.989245	0.064	0.59	0.003487	PHF3
rs828638	Imp	6	72099505	T	C	0.237	1.4	0.000839314	0.25	0.873	0.343335	0.241	1.2	0.04072	OGFRL1/RIMS1
rs508553	Imp	6	83022436	A	T	0.521	1.42	0.000134134	0.523	1.09	0.917795	0.522	1.29	0.003239	IBTK/TPBG
rs149812016	Imp	6	88246229	A	C	0.054	1.72	0.000618442	0.052	0.883	0.695427	0.054	1.45	0.01409	RARS2
rs150335804	Imp	6	88823765	A	G	0.073	1.93	0.00023961	0.076	1.585	0.0343048	0.074	1.8	2.704e-05	SPACA1/CNR1
rs164290	Geno	6	94023695	C	T	0.314	0.7	0.000857199	0.314	0.938	0.717208	0.314	0.78	0.004389	EPHA7
rs72936510	Imp	6	99300812	A	T	0.104	1.68	0.000787549	0.095	1.288	0.268881	0.101	1.55	0.000883	POU3F2/FBXL4
rs13196561	Geno	6	100760170	A	C	0.233	0.69	0.000589856	0.221	1.264	0.505918	0.229	0.89	0.02165	MCHR2/SIM1
rs9488492	Geno	6	115180226	C	T	0.224	0.68	0.000918119	0.25	1.092	0.256241	0.232	0.84	0.05601	HS3ST5/FRK
rs9387599	Imp	6	119064649	A	G	0.89	1.88	0.000237851	0.884	1.37	0.0608073	0.888	1.64	5.128e-05	PLN/MCM9
rs35899685	Imp	6	123694363	C	G	0.188	0.6	0.000428866	0.175	1.143	0.476528	0.184	0.78	0.01954	TRDN
rs6569363	Imp	6	124137745	G	A	0.131	1.58	0.000485564	0.134	0.807	0.284018	0.132	1.29	0.03684	NKAIN2
rs72991294	Imp	6	130428179	C	T	0.202	0.57	0.0001037	0.202	0.971	0.994868	0.202	0.71	0.002204	L3MBTL3
rs17180547	Imp	6	131352881	T	C	0.146	1.57	1.87023e-05	0.162	0.925	0.54145	0.151	1.32	0.002748	EPB41L2
rs13203080	Imp	6	136884811	A	G	0.152	1.49	0.000814355	0.158	0.796	0.302765	0.154	1.22	0.0453	MAP3K5
rs565583	Imp	6	137562335	T	C	0.834	1.69	0.000166593	0.82	0.888	0.955973	0.829	1.27	0.003376	IFNGR1/OLIG3
rs7752657	Imp	6	149435247	T	C	0.435	1.48	3.53002e-05	0.437	0.906	0.37568	0.436	1.24	0.00669	UST/TAB2
rs1474640	Imp	6	149813940	G	C	0.175	1.43	6.87354e-05	0.166	1.265	0.0471908	0.172	1.37	1.312e-05	ZC3H12D/PPIL4
rs2282138	Imp	6	160468553	G	A	0.066	0.44	0.000546588	0.073	0.823	0.986713	0.068	0.6	0.006278	IGF2R
rs1954919	Imp	6	162561238	C	T	0.356	0.71	0.000763787	0.333	0.946	0.810088	0.348	0.8	0.01232	PARK2
rs66462860	Imp	6	164658134	G	A	0.064	1.64	0.000864799	0.069	0.878	0.713727	0.066	1.36	0.0165	QKI/C6orf118
rs140491395	Imp	6	167111073	A	T	0.085	1.84	0.000297466	0.084	0.795	0.329737	0.085	1.45	0.02454	RPS6KA2
rs2981973	Geno	6	167716043	T	C	0.391	0.74	0.000665074	0.374	1.134	0.769262	0.386	0.86	0.01242	UNC93A
rs73038923	Imp	7	128290	T	C	0.095	1.99	0.000151414	0.094	1.302	0.29031	0.094	1.72	0.0002773	FAM20C
rs57982666	Imp	7	185861	T	C	0.309	0.61	1.98224e-06	0.314	1.25	0.0334834	0.311	0.82	0.01489	FAM20C
rs6964070	Geno	7	4503153	A	G	0.553	1.29	0.00052684	0.546	1.093	0.452991	0.55	1.22	0.001409	SDK1/FOXK1
rs1294627	Imp	7	7421310	G	A	0.739	1.51	0.000482011	0.746	0.936	0.879095	0.741	1.24	0.00792	COL28A1
rs10240887	Geno	7	8790170	C	T	0.695	1.41	0.000364714	0.678	1.097	0.35184	0.69	1.28	0.0007222	NXPH1
rs2189621	Geno	7	8794418	G	A	0.587	1.39	0.000226744	0.586	1.114	0.192756	0.587	1.28	0.00021	NXPH1/NDUFA4
rs4720970	Imp	7	11362443	G	T	0.26	1.39	0.000393122	0.25	0.976	0.825492	0.257	1.23	0.007909	PHF14/THSD7A
rs849760	Imp	7	12667787	C	G	0.606	0.74	0.000703146	0.604	1.01	0.625601	0.605	0.82	0.01788	SCIN
rs17527572	Imp	7	12670703	G	T	0.159	1.46	0.000741114	0.166	1.322	0.511802	0.161	1.41	0.002202	SCIN
rs4521664	Imp	7	14720969	G	A	0.815	1.63	0.000587213	0.837	1.529	0.0390306	0.822	1.59	6.918e-05	DGKB
rs34796119	Imp	7	15012517	C	G	0.065	1.67	0.000999449	0.07	1.051	0.782249	0.067	1.44	0.005744	DGKB
rs75232676	Imp	7	17490641	C	G	0.067	0.4	2.84001e-05	0.063	0.996	0.9158	0.066	0.62	0.0007737	AHR/SNX13
rs206204	Geno	7	20376639	C	A	0.919	0.61	0.000512438	0.915	0.579	0.000877635	0.918	0.6	1.698e-06	ITGB8
rs1833110	Imp	7	22344599	C	G	0.169	1.44	0.000735218	0.162	0.816	0.205666	0.167	1.2	0.06021	RAPGEF5
rs62450409	Imp	7	24425520	G	A	0.248	1.35	0.000573755	0.237	0.726	0.0493982	0.245	1.12	0.1332	NPY/MPP6
rs11763987	Imp	7	26630323	A	G	0.145	1.54	8.80338e-05	0.154	0.712	0.0703516	0.148	1.22	0.04844	KIAA0087/C7orf71
rs11760585	Imp	7	32253950	C	T	0.119	1.57	0.000129955	0.11	1.177	0.27903	0.116	1.43	0.0002325	PDE1C
rs6966630	Geno	7	32254014	C	T	0.412	1.43	0.000114482	0.407	1.054	0.873804	0.41	1.28	0.001712	PDE1C
rs891884	Imp	7	38634077	C	T	0.841	0.71	0.000678544	0.839	1.152	0.54096	0.841	0.83	0.02147	AMPH
rs10232058	Imp	7	41088694	A	T	0.853	1.7	0.000701429	0.847	0.994	0.720537	0.851	1.34	0.003857	SUGCT/INHBA
rs114254988	Imp	7	42206604	T	C	0.053	1.68	0.000892235	0.053	1.161	0.571968	0.053	1.51	0.003026	GLI3
rs2304316	Imp	7	43600227	A	G	0.462	0.75	0.000234396	0.449	0.946	0.248297	0.458	0.82	0.0003076	HECW1
rs11982580	Imp	7	45885592	C	A	0.536	1.46	9.69701e-05	0.542	0.94	0.37093	0.538	1.24	0.01177	ADCY1/IGFBP1
rs7779885	Imp	7	45892846	C	T	0.146	1.44	0.00085901	0.137	0.72	0.0841133	0.143	1.19	0.1186	ADCY1/IGFBP1
rs73093043	Imp	7	47763192	T	C	0.124	1.51	0.000164195	0.117	0.968	0.947115	0.122	1.31	0.003419	HUS1
rs56326742	Imp	7	48527661	A	G	0.222	0.64	0.000303364	0.223	1.131	0.626912	0.222	0.8	0.01091	ABCA13
rs1344077	Imp	7	51541426	C	T	0.14	1.58	0.00010569	0.15	0.748	0.0409316	0.143	1.25	0.0728	COBL/POM121L12
rs11515006	Geno	7	52826003	A	G	0.329	0.72	0.000424077	0.323	0.897	0.397668	0.327	0.79	0.0009766	COBL/POM121L12
rs2965588	Imp	7	52893947	A	T	0.258	1.45	8.4977e-05	0.27	1.135	0.699876	0.262	1.34	0.0008599	COBL/POM121L12
rs1558542	Geno	7	55134272	T	C	0.179	1.49	0.000295142	0.173	0.922	0.601735	0.177	1.29	0.01143	EGFR
rs7784142	Imp	7	56243648	T	C	0.642	0.74	0.000452516	0.642	1.03	0.975668	0.642	0.83	0.005415	NUPR1L/ZNF479
rs34829411	Imp	7	67317529	A	G	0.065	2.04	7.09842e-05	0.063	1.281	0.563294	0.064	1.79	0.0004917	TYW1/AUTS2
rs34361239	Imp	7	67875679	G	A	0.499	0.7	0.000517379	0.494	1.217	0.131249	0.498	0.86	0.07118	TYW1/AUTS2
rs112178928	Imp	7	75590681	T	C	0.094	0.45	0.000805998	0.081	1.355	0.0863069	0.09	0.78	0.1136	POR
rs10242583	Geno	7	78407722	C	T	0.06	1.81	9.49534e-06	0.062	0.811	0.458042	0.061	1.48	0.002441	MAGI2
rs560921	Imp	7	80791231	C	T	0.852	0.69	9.84979e-05	0.842	1.603	0.0106917	0.849	0.88	0.1351	SEMA3C/HGF
rs327684	Imp	7	80806839	G	A	0.458	0.74	0.000289808	0.442	1.066	0.299275	0.453	0.85	0.02677	SEMA3C/HGF
rs9649677	Imp	7	84478353	C	T	0.247	1.36	0.000287158	0.258	0.936	0.684665	0.25	1.2	0.009157	SEMA3A/SEMA3D
rs2463480	Imp	7	85036389	T	C	0.441	1.36	0.000230862	0.438	0.842	0.565683	0.44	1.15	0.01088	SEMA3D/GRM3
rs34386075	Imp	7	87909087	G	A	0.063	1.93	0.000311259	0.057	1.568	0.178366	0.061	1.81	0.0002433	STEAP4
rs6966330	Geno	7	89011745	G	A	0.727	0.7	0.000311355	0.728	1.07	0.734839	0.727	0.81	0.008509	C7orf62/STEAP1
rs2237587	Imp	7	95621361	A	G	0.286	0.71	0.000303088	0.284	0.922	0.75737	0.285	0.79	0.0024	DYNC1I1
rs1917937	Imp	7	96634633	A	G	0.298	0.66	0.000723137	0.305	1.223	0.209557	0.301	0.85	0.05883	SHFM1/DLX6
rs79860938	Imp	7	104410321	C	T	0.128	0.58	0.000835136	0.122	0.846	0.495866	0.126	0.68	0.002281	LHFPL3
rs7787898	Geno	7	106409897	G	T	0.464	0.7	0.00086895	0.481	1.058	0.776664	0.469	0.82	0.01437	CCDC71L/PIK3CG
rs6954882	Imp	7	106413319	G	A	0.093	1.73	0.000198301	0.076	0.868	0.723983	0.088	1.47	0.006663	CCDC71L/PIK3CG
rs6980230	Imp	7	110411171	T	A	0.573	0.69	4.94945e-06	0.571	1.089	0.969635	0.572	0.81	0.0003523	IMMP2L
rs71213281	Imp	7	111195766	C	T	0.054	1.67	0.000832787	0.052	0.933	0.540559	0.053	1.42	0.02414	IMMP2L
rs798905	Geno	7	120918780	C	T	0.254	1.33	0.000812691	0.246	1.009	0.878591	0.251	1.21	0.01099	CPED1
rs73222289	Imp	7	123213703	T	A	0.26	0.71	0.000468418	0.274	0.954	0.669231	0.264	0.8	0.002541	ASB15
rs1862084	Geno	7	131317893	T	C	0.086	1.62	0.000667541	0.092	0.744	0.516284	0.088	1.29	0.02261	PODXL/PLXNA4
rs10240355	Imp	7	131939639	C	T	0.261	1.42	0.000146178	0.265	1.09	0.45311	0.262	1.3	0.000554	PLXNA4
rs1424572	Imp	7	136560679	C	T	0.276	1.29	0.000578947	0.29	0.97	0.549457	0.281	1.17	0.0192	CHRM2
rs73156831	Imp	7	139235539	C	A	0.161	0.59	0.000948988	0.17	1.176	0.444625	0.164	0.79	0.03299	CLEC2L/HIPK2
rs10239669	Imp	7	142744817	C	A	0.695	0.7	0.000495711	0.698	1.033	0.447825	0.696	0.8	0.02287	OR9A2/OR6V1
rs7779936	Imp	7	146046918	G	A	0.064	1.69	2.90237e-05	0.063	1.312	0.304373	0.064	1.56	8.642e-05	CNTNAP2
rs73744519	Imp	7	147356104	G	A	0.078	1.67	0.00040247	0.072	1.248	0.597808	0.076	1.52	0.001858	CNTNAP2
rs855682	Imp	7	149481652	C	A	0.104	1.53	0.000241784	0.103	1.33	0.155819	0.104	1.47	0.0001661	SSPO
rs12538823	Geno	7	150912750	T	G	0.094	1.55	0.00033449	0.111	0.962	0.626895	0.1	1.33	0.01155	ABCF2
rs62480440	Imp	7	155792460	A	G	0.07	0.35	0.000302778	0.063	1.474	0.0627821	0.068	0.8	0.08931	SHH/C7orf13
rs2907962	Imp	7	156727620	A	G	0.553	0.75	0.000529261	0.549	0.994	0.635863	0.552	0.83	0.002518	LMBR1/NOM1
rs117254320	Imp	8	2008847	A	G	0.069	1.62	0.000522599	0.08	0.826	0.443176	0.072	1.32	0.02384	MYOM2
rs7015864	Imp	8	4192206	G	A	0.627	0.72	0.000143098	0.613	1.053	0.733862	0.623	0.82	0.005343	CSMD1
rs11776625	Imp	8	4602067	A	G	0.092	1.79	4.00613e-05	0.084	0.949	0.921652	0.089	1.47	0.001502	CSMD1
rs144415947	Imp	8	5820432	T	G	0.052	1.71	0.00026039	0.06	1.515	0.199142	0.055	1.64	0.0002451	CSMD1/MCPH1
rs1427011	Imp	8	14151519	G	A	0.38	0.73	0.000749454	0.392	0.874	0.492258	0.384	0.78	0.002084	SGCZ
rs73209862	Imp	8	14174680	T	C	0.321	1.5	1.15767e-05	0.294	1.086	0.788127	0.312	1.35	0.0002951	SGCZ
rs118001998	Imp	8	16270731	T	A	0.068	0.45	0.000996809	0.066	1.215	0.853482	0.067	0.72	0.006807	MSR1
rs1358149	Imp	8	16396165	G	T	0.906	0.57	8.83212e-05	0.897	0.786	0.103009	0.903	0.64	4.267e-05	MSR1
rs2898460	Imp	8	17492069	G	A	0.061	1.7	0.000136877	0.057	1.309	0.107508	0.06	1.57	6.457e-05	PDGFRL
rs11779828	Imp	8	19310208	G	T	0.05	0.35	0.00033525	0.053	0.851	0.741309	0.051	0.56	0.002461	CSGALNACT1
rs28597716	Imp	8	19936687	G	A	0.206	1.46	0.000383722	0.19	0.835	0.298587	0.201	1.23	0.03106	LPL/SLC18A1
rs6998704	Imp	8	29000610	G	A	0.454	1.46	0.00019482	0.443	1.109	0.471665	0.45	1.32	0.0007305	KIF13B
rs2553267	Imp	8	30941922	G	T	0.088	1.64	0.000383675	0.098	0.781	0.727778	0.091	1.32	0.009812	WRN
rs7837872	Geno	8	31070598	C	A	0.213	1.38	0.00056277	0.222	1.063	0.993822	0.216	1.27	0.006505	WRN/NRG1
rs13263484	Imp	8	39401893	C	T	0.737	0.72	0.000189065	0.732	1.144	0.588237	0.736	0.84	0.009142	ADAM32/ADAM18
rs7835066	Imp	8	49344415	T	C	0.117	1.64	0.000983852	0.123	1.159	0.978873	0.119	1.47	0.009013	UBE2V2/EFCAB1
rs72637491	Imp	8	53784240	G	A	0.068	1.75	0.000825361	0.06	1.445	0.472103	0.066	1.66	0.002091	RB1CC1/NPBWR1
rs17405784	Imp	8	55721066	A	G	0.152	0.61	0.000866092	0.147	1.029	0.833256	0.151	0.75	0.01264	RP1/XKR4
rs4386955	Geno	8	57035027	A	G	0.099	1.56	0.000211839	0.109	1.009	0.7336	0.102	1.36	0.00677	MOS/PLAG1
rs1598718	Imp	8	59388090	T	G	0.381	0.7	0.000375021	0.361	0.915	0.568373	0.374	0.77	0.001616	UBXN2B/CYP7A1
rs11787444	Geno	8	61294126	T	C	0.159	1.51	0.000900444	0.163	0.859	0.773859	0.16	1.26	0.01478	CA8/RAB2A
rs13248442	Imp	8	63315353	C	G	0.531	0.73	0.000538318	0.538	1.045	0.78907	0.534	0.83	0.01044	NKAIN3
rs7831659	Imp	8	69111244	A	G	0.158	1.49	0.000510018	0.158	0.993	0.801508	0.158	1.31	0.003826	PREX2
rs10957895	Geno	8	79548197	A	G	0.952	0.53	0.000720212	0.946	0.809	0.221322	0.95	0.61	0.0006329	PKIA/ZC2HC1A
rs4739756	Imp	8	81503329	C	T	0.444	1.37	0.000245867	0.462	0.988	0.434571	0.45	1.22	0.0007537	ZBTB10/ZNF704
rs1132752	Imp	8	81541293	T	A	0.775	1.62	0.000429356	0.792	1.198	0.485631	0.78	1.44	0.00136	ZNF704
rs13256141	Imp	8	83999431	T	C	0.067	1.76	0.000121926	0.071	0.865	0.535619	0.068	1.41	0.008182	SNX16/RALYL
rs10101007	Imp	8	84010832	G	A	0.606	1.39	0.000258667	0.619	0.836	0.309187	0.61	1.14	0.02439	SNX16/RALYL
rs7835902	Geno	8	90608086	G	T	0.287	0.69	0.000356774	0.269	0.841	0.292511	0.281	0.74	0.0005392	MMP16/RIPK2
rs17756061	Imp	8	93489016	A	G	0.129	1.5	0.000881666	0.126	0.985	0.862625	0.128	1.31	0.01198	RUNX1T1/TRIQK
rs141765611	Imp	8	98176428	G	A	0.076	0.44	0.00082495	0.074	0.825	0.313095	0.075	0.58	0.001132	CPQ/TSPYL5
rs16896628	Geno	8	99100559	G	A	0.266	1.42	0.000706485	0.265	0.999	0.883846	0.266	1.26	0.005821	C8orf47
rs2105508	Geno	8	101580997	A	G	0.311	1.43	0.000344991	0.292	0.925	0.153196	0.305	1.24	0.05254	ANKRD46/SNX31
rs12677521	Imp	8	103732739	C	T	0.122	1.53	0.000699961	0.118	0.96	0.711683	0.121	1.31	0.01461	KLF10/AZIN1
rs2513938	Imp	8	103733941	C	T	0.155	0.63	0.000844638	0.164	0.731	0.0962383	0.158	0.67	0.0002584	KLF10/AZIN1
rs1902323	Imp	8	108354035	G	A	0.464	0.73	0.00037642	0.438	1.203	0.193834	0.456	0.88	0.04548	ANGPT1
rs62535494	Imp	8	108993258	C	T	0.052	1.81	0.000232812	0.052	1.278	0.436751	0.052	1.63	0.0007303	RSPO2
rs12682334	Imp	8	111000505	T	A	0.244	0.65	0.000933251	0.238	0.966	0.933391	0.242	0.77	0.007851	KCNV1/CSMD3
rs2049865	Imp	8	116588546	A	C	0.595	1.5	5.47662e-05	0.596	1.065	0.52214	0.596	1.32	0.0003545	TRPS1
rs117255960	Imp	8	117220164	T	A	0.095	1.6	0.00072547	0.097	1.911	0.000688705	0.096	1.71	2.002e-06	TRPS1/EIF3H
rs12676684	Imp	8	118857704	C	G	0.193	1.43	0.000151658	0.204	0.9	0.522543	0.197	1.22	0.009605	EXT1
rs12545372	Imp	8	119822573	A	T	0.564	0.7	4.74032e-05	0.553	0.927	0.753057	0.56	0.77	0.000679	SAMD12/TNFRSF11B
rs2017155	Geno	8	123031994	A	C	0.354	0.71	0.000189744	0.364	0.882	0.569886	0.357	0.77	0.001003	HAS2/ZHX2
rs6983143	Imp	8	124891485	A	G	0.767	1.49	0.000338315	0.763	1.003	0.937071	0.766	1.27	0.004086	FER1L6
rs7815027	Geno	8	125215606	G	A	0.679	0.73	0.000436156	0.689	0.806	0.0587793	0.682	0.75	8.332e-05	FER1L6/TMEM65
rs10956238	Geno	8	126311265	T	G	0.585	0.73	0.000575276	0.581	0.894	0.435489	0.584	0.78	0.001412	NSMCE2
rs79382561	Imp	8	129831914	T	C	0.102	0.51	0.000392939	0.098	1.081	0.326818	0.101	0.74	0.02869	TMEM75/CCDC26
rs1435451	Imp	8	131895286	T	G	0.245	0.62	6.70191e-05	0.225	0.986	0.946109	0.238	0.75	0.001947	ADCY8
rs4736717	Imp	8	131898793	G	A	0.647	0.69	3.63514e-05	0.632	1.044	0.133252	0.642	0.8	0.01995	ADCY8
rs4897631	Imp	8	135165503	C	T	0.471	1.4	0.000696078	0.456	1.025	0.933676	0.466	1.25	0.006486	ST3GAL1/ZFAT
rs28833242	Imp	8	135247053	T	C	0.151	1.53	0.00080605	0.153	1.014	0.818336	0.151	1.33	0.005426	ST3GAL1/ZFAT
rs7017531	Imp	8	136408717	G	A	0.435	1.33	0.000785422	0.418	0.96	0.852354	0.429	1.19	0.01141	ZFAT/KHDRBS3
rs11166646	Geno	8	137281470	C	T	0.231	1.4	0.000952661	0.214	1.104	0.839959	0.226	1.29	0.006395	KHDRBS3/FAM135B
rs2542438	Imp	8	140599691	T	G	0.348	0.73	0.000581779	0.341	1.048	0.763394	0.346	0.84	0.01161	COL22A1/KCNK9
rs2545434	Imp	8	140615731	C	T	0.753	0.72	0.0003574	0.744	1.049	0.762164	0.75	0.82	0.002718	KCNK9
rs1535837	Imp	9	2288633	A	G	0.481	1.46	0.000102813	0.476	0.789	0.0361528	0.48	1.17	0.07707	SMARCA2/VLDLR
rs68158920	Imp	9	2299969	A	G	0.113	1.59	7.99228e-05	0.116	0.846	0.423408	0.114	1.34	0.00896	SMARCA2/VLDLR
rs10974387	Imp	9	4197639	C	A	0.071	1.89	1.82885e-05	0.074	1.202	0.231676	0.072	1.63	3.927e-05	GLIS3
rs34709468	Imp	9	4674530	A	G	0.18	0.67	0.000406578	0.19	0.952	0.815904	0.183	0.77	0.008258	PPAPDC2/CDC37L1
rs35946183	Imp	9	7555942	A	G	0.328	0.73	0.00053927	0.326	0.884	0.668571	0.327	0.78	0.002796	KDM4C/TMEM261
rs1768893	Imp	9	9751905	T	A	0.448	0.7	0.000916378	0.445	1.03	0.926022	0.447	0.81	0.01066	PTPRD
rs10816231	Imp	9	9918635	T	C	0.065	1.77	0.00045763	0.059	0.996	0.569338	0.063	1.48	0.001866	PTPRD
rs4741148	Geno	9	11339109	C	T	0.523	0.7	0.000890948	0.524	0.804	0.14856	0.523	0.74	0.0004527	PTPRD/TYRP1
rs12551855	Imp	9	14093727	T	A	0.067	1.69	0.000303576	0.074	1.163	0.591274	0.07	1.49	0.001494	NFIB
rs13283842	Imp	9	17051856	T	C	0.463	1.4	0.00011452	0.455	0.996	0.613163	0.46	1.24	0.0008088	BNC2/CNTLN
rs10756935	Imp	9	18126678	A	T	0.745	0.73	0.000658524	0.751	0.84	0.396542	0.747	0.76	0.00135	SH3GL2/ADAMTSL1
rs7865867	Imp	9	19259291	A	G	0.796	0.73	0.000953906	0.788	1.066	0.867371	0.794	0.83	0.01245	DENND4C
rs637658	Geno	9	24284921	G	T	0.952	0.49	0.000702113	0.95	0.71	0.555945	0.951	0.56	0.00243	ELAVL2/IZUMO3
rs1926770	Imp	9	26582745	A	C	0.101	1.47	0.000793672	0.097	0.666	0.144398	0.1	1.21	0.08132	TUSC1/CAAP1
rs10115941	Imp	9	26747859	T	C	0.122	1.62	0.000275928	0.123	0.961	0.792721	0.122	1.37	0.006881	TUSC1/CAAP1
rs76720239	Imp	9	28728638	G	A	0.058	1.76	0.000576236	0.058	0.933	0.992605	0.058	1.47	0.006816	LINGO2
rs10738953	Imp	9	35980256	C	T	0.554	1.41	0.00064723	0.55	1.057	0.744089	0.553	1.27	0.003881	OR2S2/RECK
rs7027417	Imp	9	36023246	G	A	0.141	0.6	0.000479102	0.146	0.755	0.28123	0.143	0.66	0.0006391	OR2S2/RECK
rs12550953	Imp	9	38134424	A	T	0.586	0.68	6.39263e-05	0.564	1.075	0.471276	0.579	0.8	0.006834	SHB/ALDH1B1
rs13287524	Imp	9	38295121	G	T	0.168	0.62	0.000597419	0.16	1.095	0.884031	0.165	0.78	0.008954	SHB/ALDH1B1
rs4237230	Imp	9	71970968	A	G	0.68	0.69	3.01062e-05	0.667	0.965	0.412077	0.676	0.78	0.0001495	FAM189A2
rs62570235	Imp	9	72023878	G	C	0.084	1.73	0.000131668	0.087	0.848	0.745004	0.084	1.42	0.004941	FAM189A2/APBA1
rs17061731	Imp	9	78478639	T	C	0.084	1.68	4.64871e-05	0.079	1.166	0.323252	0.083	1.49	0.0001355	OSTF1/PCSK5
rs6559442	Imp	9	81646503	A	G	0.272	0.71	0.000401938	0.276	1.146	0.547078	0.273	0.86	0.01568	PSAT1/TLE4
rs11139169	Imp	9	83971021	T	C	0.231	0.66	0.000776073	0.222	1.161	0.250963	0.228	0.84	0.05239	TLE4/TLE1
rs11140419	Imp	9	86793119	A	G	0.094	1.53	0.000267085	0.098	1.089	0.835667	0.095	1.38	0.00271	RMI1/SLC28A3
rs11140478	Imp	9	86875581	G	A	0.127	1.5	0.000452611	0.13	1.004	0.987962	0.128	1.32	0.005903	RMI1/SLC28A3
rs2770835	Imp	9	88539274	T	C	0.503	0.72	0.000256977	0.512	1.147	0.509502	0.506	0.85	0.01342	AGTPBP1/NAA35
rs17353249	Imp	9	88596483	G	A	0.099	1.64	0.000243159	0.093	1.006	0.877359	0.097	1.42	0.002835	NAA35
rs12376465	Imp	9	92227503	T	C	0.199	0.63	0.000193235	0.18	1.075	0.801359	0.193	0.78	0.00542	GADD45G/DIRAS2
rs77212921	Imp	9	92260948	G	T	0.15	1.6	4.45197e-05	0.138	0.867	0.891456	0.146	1.32	0.001739	GADD45G/DIRAS2
rs117331124	Imp	9	96203685	G	A	0.074	0.39	8.39008e-05	0.072	1.107	0.483474	0.073	0.67	0.007679	C9orf129/FAM120AOS
rs10988964	Imp	9	102845066	T	G	0.097	1.71	0.000141383	0.094	0.66	0.169529	0.096	1.35	0.03148	ERP44
rs61548089	Imp	9	102923423	T	C	0.3	0.69	0.000132047	0.291	1.023	0.844473	0.297	0.8	0.003854	INVS
rs55993340	Imp	9	104733970	C	G	0.407	0.72	0.000604404	0.412	1.148	0.163389	0.408	0.86	0.06542	PPP3R2/CYLC2
rs1415686	Geno	9	106236224	A	C	0.11	1.55	0.000376398	0.116	0.732	0.0453448	0.112	1.23	0.117	CYLC2/SMC2
rs34248878	Imp	9	106352885	T	C	0.219	1.39	0.000293914	0.232	0.857	0.279701	0.223	1.19	0.02885	CYLC2/SMC2
rs13440340	Imp	9	112413429	A	G	0.085	1.67	0.000118602	0.097	0.993	0.945951	0.089	1.41	0.002117	PALM2
rs818692	Imp	9	116165978	A	G	0.254	1.47	0.000731266	0.251	1.001	0.938791	0.253	1.29	0.006779	ALAD/POLE3
rs10759992	Imp	9	121418525	C	T	0.306	0.68	0.000242071	0.3	0.871	0.653479	0.304	0.75	0.001537	TLR4/BRINP1
rs543070	Imp	9	126596547	G	A	0.184	1.39	0.000978679	0.184	1.119	0.159171	0.184	1.28	0.0005324	DENND1A
rs1042486	Imp	9	126783433	C	G	0.433	0.7	0.000393383	0.447	1.012	0.61479	0.438	0.8	0.001924	LHX2
rs888234	Geno	9	128880042	A	G	0.593	0.7	0.000643041	0.603	1.141	0.191653	0.596	0.83	0.05965	PBX3/MVB12B
rs12346285	Imp	9	132195730	T	C	0.212	1.33	0.000577786	0.203	1.011	0.831167	0.209	1.22	0.00448	C9orf106/NTMT1
rs10988420	Geno	9	132308843	T	C	0.264	0.68	0.000275332	0.231	1.005	0.538959	0.253	0.79	0.001181	C9orf106/NTMT1
rs10793906	Imp	9	135123700	T	C	0.369	1.46	0.000169241	0.375	0.825	0.221976	0.371	1.18	0.02713	NTNG2/SETX
rs142737053	Imp	9	135308164	A	G	0.079	1.86	0.000383793	0.074	0.839	0.333912	0.078	1.51	0.02771	C9orf171
rs7021932	Imp	9	139420590	C	T	0.146	1.56	0.000648357	0.166	1.011	0.880595	0.152	1.34	0.005457	NOTCH1
rs28452008	Imp	9	140356422	C	G	0.374	1.36	0.00062789	0.363	1.108	0.497901	0.37	1.27	0.001866	PNPLA7
rs17135209	Geno	10	3442533	T	C	0.186	1.49	0.000835241	0.197	0.905	0.821892	0.19	1.25	0.01268	PITRM1/KLF6
rs501764	Geno	10	8093034	T	G	0.804	0.67	0.000411392	0.799	0.817	0.0905601	0.803	0.72	0.0001307	TAF3/GATA3
rs17363282	Imp	10	9120894	G	A	0.051	1.8	0.000234695	0.054	1.449	0.12873	0.052	1.67	0.0001265	GATA3/CELF2
rs10906651	Imp	10	14382319	G	T	0.304	1.44	5.2333e-05	0.293	0.868	0.213911	0.301	1.23	0.01552	FRMD4A
rs7905486	Imp	10	16557560	A	G	0.326	1.51	1.395e-07	0.337	0.896	0.840702	0.33	1.26	5.731e-05	C1QL3
rs7914151	Imp	10	16559643	C	A	0.208	0.62	1.29753e-05	0.206	1.124	0.481344	0.207	0.81	0.002695	C1QL3
rs7894306	Imp	10	18617178	C	T	0.197	0.62	0.000488394	0.164	1.073	0.601874	0.186	0.77	0.01531	CACNB2
rs12265336	Imp	10	23700626	G	C	0.199	1.43	0.000737691	0.193	0.748	0.168925	0.197	1.18	0.07019	C10orf67/OTUD1
rs11013713	Imp	10	24091046	C	A	0.228	1.48	4.6133e-05	0.231	0.845	0.394051	0.229	1.24	0.007277	KIAA1217
rs2505445	Imp	10	26014569	C	T	0.242	0.65	0.000989186	0.243	1.084	0.283114	0.242	0.81	0.05327	GPR158/MYO3A
rs1615712	Imp	10	26989422	C	T	0.943	2.46	0.000585381	0.938	0.702	0.328331	0.941	1.2	0.03523	PDSS1
rs10826549	Geno	10	29277541	A	G	0.237	0.63	0.000118385	0.239	1.174	0.838443	0.238	0.81	0.003658	C10orf126/LYZL1
rs4551704	Geno	10	33442404	T	C	0.412	1.48	0.000216725	0.389	0.956	0.5185	0.405	1.28	0.01189	ITGB1/NRP1
rs10793573	Imp	10	45463220	T	C	0.71	0.68	0.000110616	0.697	1.068	0.884791	0.706	0.8	0.001723	RASSF4
rs4075112	Imp	10	48491762	C	T	0.285	1.41	0.000820498	0.27	1.213	0.171112	0.28	1.34	0.0005042	GDF10/PTPN20B
rs11101412	Imp	10	49856827	A	G	0.241	1.55	3.87601e-05	0.241	1.114	0.274364	0.241	1.39	9.065e-05	ARHGAP22
rs75221432	Imp	10	56372552	G	C	0.122	0.56	0.000109135	0.122	1.138	0.167492	0.122	0.79	0.02802	PCDH15
rs10825482	Imp	10	57001377	C	G	0.431	1.36	0.000947236	0.468	1.123	0.573369	0.443	1.27	0.003172	PCDH15
rs10509070	Imp	10	58801214	C	G	0.053	1.56	0.00068671	0.057	0.931	0.994086	0.054	1.32	0.007602	ZWINT/IPMK
rs1620186	Imp	10	60314275	A	G	0.512	0.72	0.000267556	0.519	0.883	0.117533	0.514	0.78	0.0001255	BICC1
rs10995392	Imp	10	64764692	T	C	0.354	1.35	0.000747424	0.357	0.916	0.758909	0.355	1.17	0.01365	EGR2/NRBF2
rs61868121	Imp	10	70395656	C	T	0.082	1.78	8.25109e-05	0.093	1.13	0.426205	0.085	1.53	0.0003293	TET1
rs10740439	Imp	10	76307972	T	C	0.755	1.49	0.000368319	0.775	0.941	0.691627	0.761	1.24	0.01044	ADK
rs55764635	Imp	10	83944251	A	G	0.177	1.57	0.000958024	0.171	1.261	0.318829	0.175	1.46	0.001303	NRG3
rs589549	Imp	10	84411510	A	G	0.145	1.42	0.000977016	0.159	1.004	0.835852	0.149	1.27	0.01354	NRG3
rs7916437	Imp	10	87311370	A	C	0.256	1.48	0.000287192	0.246	1.003	0.664088	0.253	1.31	0.001785	CCSER2/GRID1
rs10882112	Imp	10	94564508	A	G	0.499	0.76	0.000237932	0.507	1.024	0.555628	0.502	0.84	0.01137	HHEX/EXOC6
rs10882259	Geno	10	95274972	A	C	0.661	1.47	3.67981e-05	0.671	1.128	0.626449	0.665	1.34	0.000385	CEP55
rs10884597	Imp	10	109865613	A	T	0.125	1.56	5.82775e-05	0.14	1.131	0.459515	0.13	1.4	0.0002927	SORCS1/XPNPEP1
rs7904699	Imp	10	113099613	G	C	0.884	0.65	0.00026096	0.89	0.828	0.397589	0.886	0.7	0.0006813	ADRA2A/GPAM
rs12771602	Imp	10	115615024	T	A	0.075	0.4	0.000279009	0.078	1.153	0.560546	0.076	0.73	0.01229	NHLRC2
rs2040065	Imp	10	119658367	C	T	0.869	0.66	0.000217057	0.872	1.146	0.707983	0.87	0.78	0.007318	EMX2/RAB11FIP2
rs12267239	Imp	10	120571163	A	G	0.117	0.46	0.00012258	0.116	0.922	0.967234	0.117	0.63	0.002701	CACUL1/NANOS1
rs11199481	Imp	10	122441386	T	C	0.273	1.44	0.000128671	0.27	1.194	0.145006	0.272	1.35	9.087e-05	C10orf85/WDR11
rs79708704	Imp	10	123818927	T	G	0.107	1.63	0.000180508	0.105	0.852	0.307046	0.106	1.34	0.02034	TACC2
rs72842384	Imp	10	126363020	A	G	0.164	0.62	0.000909867	0.173	0.925	0.532624	0.167	0.73	0.002726	FAM53B
rs718949	Geno	10	126739029	G	A	0.22	1.41	0.000576267	0.21	1.066	0.241929	0.216	1.28	0.0005982	CTBP2
rs11244972	Imp	10	128070023	C	T	0.355	0.71	0.000424657	0.355	0.887	0.621925	0.355	0.77	0.002073	ADAM12
rs2251103	Geno	10	130113999	T	C	0.334	1.38	0.000733914	0.33	1.08	0.31903	0.333	1.26	0.001063	MKI67/MGMT
rs11101753	Imp	10	135251550	T	C	0.069	1.78	0.000127858	0.082	0.816	0.598943	0.073	1.4	0.007083	SPRN
rs7081877	Imp	10	135435809	T	C	0.302	0.66	0.000367001	0.288	0.944	0.893103	0.298	0.76	0.006464	SYCE1/FRG2B
rs11246131	Geno	11	367139	T	G	0.068	1.75	0.000777949	0.068	1.495	0.0277542	0.068	1.65	6.259e-05	IFITM3/B4GALNT4
rs234878	Imp	11	2816336	A	G	0.588	1.52	0.000143176	0.577	1.033	0.655746	0.584	1.32	0.001077	KCNQ1
rs4910324	Imp	11	11363431	A	G	0.238	0.61	0.000173497	0.224	1.004	0.581367	0.234	0.75	0.0009771	GALNT18
rs11022268	Imp	11	12290628	C	T	0.954	0.44	1.85048e-07	0.946	0.796	0.294222	0.951	0.53	2.007e-06	MICAL2/MICALCL
rs11022775	Geno	11	13373764	T	C	0.073	1.79	6.80207e-05	0.075	0.982	0.859975	0.073	1.48	0.002458	ARNTL
rs4757292	Geno	11	15164117	A	G	0.408	0.68	0.000222359	0.394	0.968	0.781493	0.403	0.77	0.002078	INSC
rs10832832	Imp	11	17670443	A	G	0.226	1.43	0.000978447	0.215	0.887	0.304545	0.223	1.22	0.04955	OTOG/MYOD1
rs72890593	Imp	11	39867137	G	A	0.076	1.86	0.000101609	0.088	0.772	0.424891	0.08	1.44	0.01018	LRRC4C
rs10837876	Imp	11	42573138	C	T	0.514	0.71	0.000355623	0.513	0.849	0.144254	0.513	0.76	0.0002054	LRRC4C/API5
rs117937213	Imp	11	46792833	A	G	0.055	1.81	0.0005809	0.06	0.848	0.543475	0.056	1.45	0.01953	CKAP5
rs730205	Imp	11	56843652	T	G	0.189	1.45	0.000194223	0.191	1.197	0.0632568	0.189	1.35	4.515e-05	OR5AK2/LRRC55
rs499318	Imp	11	57012322	G	A	0.355	1.32	0.000824513	0.358	0.998	0.836385	0.356	1.19	0.005756	APLNR/TNKS1BP1
rs12361059	Imp	11	60742896	A	G	0.134	1.49	0.000423846	0.132	0.792	0.348135	0.134	1.22	0.02795	CD6
rs75306442	Imp	11	61641396	T	C	0.2	1.39	0.000405564	0.204	0.881	0.394143	0.201	1.19	0.0238	FADS3
rs555903	Geno	11	65466911	A	G	0.103	0.55	7.31571e-05	0.109	0.91	0.689563	0.105	0.69	0.0007527	RELA/KAT5
rs637571	Imp	11	65664346	C	T	0.429	0.7	0.000166726	0.433	0.731	0.0106775	0.43	0.71	5.671e-06	FOSL1
rs3019748	Imp	11	68924996	A	G	0.382	0.73	0.000369847	0.364	0.995	0.558562	0.376	0.82	0.01453	TPCN2/MYEOV
rs3862773	Imp	11	70668593	A	G	0.302	1.35	0.000917293	0.312	0.857	0.320191	0.305	1.16	0.04569	SHANK2
rs66682347	Imp	11	70830350	T	G	0.098	1.57	0.00091466	0.107	1.412	0.0701953	0.101	1.51	0.0001938	SHANK2
rs867248	Imp	11	76117161	T	C	0.217	1.39	0.000166746	0.239	1.273	0.0787288	0.224	1.35	5.156e-05	PRKRIR/C11orf30
rs2155226	Imp	11	76273855	C	T	0.592	1.41	9.89579e-05	0.608	1.342	0.0307706	0.597	1.38	1.096e-05	C11orf30/LRRC32
rs7937832	Imp	11	83577954	G	T	0.229	0.62	0.000139694	0.22	1.068	0.599634	0.226	0.77	0.007443	DLG2
rs11234893	Imp	11	86677186	A	C	0.244	1.48	4.92176e-05	0.265	0.8	0.0895195	0.251	1.2	0.03148	FZD4/TMEM135
rs35469737	Imp	11	86694767	T	C	0.058	2.07	7.03641e-07	0.06	1.308	0.268731	0.058	1.8	4.469e-06	FZD4/TMEM135
rs1586404	Imp	11	87820908	T	C	0.629	1.43	0.000382065	0.649	1.138	0.166959	0.635	1.31	0.000263	TMEM135/RAB38
rs12418251	Imp	11	91504914	G	T	0.057	1.7	0.000460644	0.055	1.542	0.113291	0.056	1.64	0.0001881	DISC1FP1/FAT3
rs78973513	Imp	11	97137756	G	T	0.059	1.84	0.000127172	0.061	1.13	0.588927	0.059	1.59	0.0008052	JRKL/CNTN5
rs11212752	Imp	11	97665057	C	T	0.196	1.41	0.000269562	0.191	0.966	0.592171	0.195	1.25	0.01111	JRKL/CNTN5
rs2186991	Imp	11	102290602	A	C	0.506	0.66	2.35081e-05	0.494	0.772	0.210052	0.502	0.7	4.081e-05	TMEM123
rs655403	Imp	11	102708507	T	C	0.139	0.58	0.000453066	0.139	0.715	0.0456059	0.139	0.63	6.498e-05	MMP3
rs79590713	Imp	11	107818965	A	G	0.055	0.34	0.000720639	0.065	0.732	0.304839	0.058	0.5	0.000982	RAB39A
rs79362350	Imp	11	114661501	T	G	0.144	0.58	0.000203412	0.154	0.997	0.682085	0.147	0.74	0.001482	NXPE2/CADM1
rs3017228	Imp	11	116560992	G	A	0.307	0.68	0.000158594	0.29	1.353	0.00710498	0.302	0.91	0.1881	CADM1/BUD13
rs12364701	Imp	11	120203652	T	G	0.373	0.63	3.03568e-05	0.362	0.981	0.544127	0.369	0.75	0.0002535	TMEM136
rs4936616	Imp	11	121221440	A	G	0.573	1.39	0.000273796	0.574	1.079	0.975784	0.574	1.26	0.003917	SC5D/SORL1
rs34057425	Imp	11	123341589	A	T	0.346	0.69	0.000262265	0.337	0.932	0.818653	0.343	0.77	0.002561	CLMP/GRAMD1B
rs76670383	Imp	11	128915963	T	C	0.071	0.46	0.000999659	0.074	0.585	0.108045	0.072	0.51	0.000341	ARHGAP32
rs12807953	Imp	11	130510294	A	G	0.052	0.4	0.000998648	0.05	0.725	0.154599	0.051	0.55	0.0005223	ADAMTS15/C11orf44
rs2511766	Geno	11	131111310	C	T	0.86	1.67	0.000834334	0.872	0.862	0.430284	0.864	1.26	0.03191	SNX19/NTM
rs2917586	Imp	11	132629899	C	T	0.574	0.65	1.1587e-05	0.582	1.02	0.896705	0.577	0.76	0.0007413	OPCML
rs144554045	Imp	11	133939307	T	C	0.078	1.71	0.000739637	0.081	1.069	0.723888	0.079	1.5	0.01468	JAM3
rs7977431	Imp	12	671638	T	C	0.152	0.53	0.000495651	0.148	1.323	0.222457	0.151	0.8	0.04642	B4GALNT3
rs10849596	Imp	12	1053480	G	A	0.123	1.65	0.00013286	0.13	0.984	0.877557	0.125	1.4	0.003561	RAD52
rs2968909	Imp	12	2897864	G	C	0.17	1.48	0.000283897	0.173	1.126	0.271371	0.171	1.34	0.0004056	CACNA1C-IT3/FKBP4
rs7304393	Imp	12	3880594	T	C	0.739	0.72	0.000555135	0.708	1.055	0.747524	0.729	0.82	0.0117	EFCAB4B/PARP11
rs216866	Imp	12	6090825	C	T	0.243	0.69	0.000593228	0.229	1.115	0.373939	0.238	0.83	0.03098	VWF
rs2070886	Imp	12	6094065	T	C	0.23	1.49	2.92792e-05	0.23	0.9	0.426034	0.23	1.26	0.005095	VWF
rs1671473	Geno	12	16277435	C	A	0.381	0.69	7.62687e-05	0.359	1.026	0.987815	0.374	0.8	0.001778	DERA/SLC15A5
rs56344966	Imp	12	16280913	A	G	0.304	0.66	6.51997e-05	0.308	1.031	0.886193	0.305	0.78	0.002237	DERA/SLC15A5
rs10743457	Geno	12	23277758	C	T	0.604	0.73	0.000186095	0.609	1.136	0.0626978	0.605	0.85	0.07241	ETNK1/SOX5
rs7305125	Imp	12	26960599	C	G	0.342	1.45	3.22796e-05	0.319	1.074	0.971239	0.335	1.31	0.001147	ITPR2
rs708180	Imp	12	27624942	C	T	0.782	1.55	0.000890053	0.784	1.315	0.148821	0.783	1.45	0.0004533	SMCO2
rs61918685	Imp	12	29637447	C	T	0.055	1.98	0.000426929	0.056	1.456	0.126382	0.055	1.79	0.000202	OVCH1
rs12372597	Imp	12	42412850	T	C	0.362	0.68	0.000107944	0.347	0.926	0.704673	0.357	0.76	0.001026	PDZRN4/GXYLT1
rs10880237	Imp	12	42474888	C	T	0.087	0.52	0.000584177	0.079	0.846	0.927211	0.084	0.64	0.005696	PDZRN4/GXYLT1
rs17097570	Geno	12	47461183	T	C	0.078	0.39	2.41288e-05	0.084	1.31	0.170471	0.08	0.73	0.01309	SLC38A4/AMIGO2
rs4238107	Imp	12	50998386	T	A	0.247	0.63	0.000486822	0.243	0.983	0.540253	0.245	0.75	0.001781	DIP2B
rs1659793	Imp	12	52266209	G	T	0.714	0.71	0.00092748	0.703	1.031	0.805601	0.71	0.81	0.005781	AC068987.1/ANKRD33
rs12813751	Imp	12	55336895	C	T	0.166	1.48	0.000706825	0.174	0.825	0.265104	0.169	1.22	0.0476	MUCL1/TESPA1
rs1908536	Imp	12	58838688	G	C	0.509	1.39	0.000606987	0.521	0.957	0.828706	0.513	1.21	0.01026	XRCC6BP1/RP11-362K2.2
rs61919216	Imp	12	59134299	G	C	0.053	1.99	8.73258e-05	0.05	1.149	0.724086	0.052	1.72	0.0009411	RP11-362K2.2
rs11174361	Imp	12	62571029	G	A	0.113	1.57	0.00013981	0.11	1.06	0.909617	0.112	1.39	0.002144	FAM19A2
rs12371950	Imp	12	63342364	T	C	0.11	0.39	6.02961e-06	0.115	1.161	0.436989	0.112	0.72	0.002034	PPM1H/AVPR1A
rs11177549	Imp	12	69599989	A	T	0.244	1.37	0.000867567	0.253	0.898	0.654959	0.247	1.19	0.01889	CPM/CPSF6
rs10784773	Imp	12	69645235	T	G	0.402	1.4	0.000607988	0.419	0.906	0.240065	0.407	1.2	0.04815	CPSF6
rs9783470	Imp	12	71863278	A	G	0.055	1.95	2.90384e-05	0.053	0.89	0.706753	0.055	1.59	0.002205	LGR5
rs10785021	Geno	12	73763389	G	A	0.218	0.65	3.83684e-05	0.221	0.774	0.0521785	0.219	0.7	9.035e-06	TRHDE/ATXN7L3B
rs66654091	Imp	12	74598002	C	A	0.136	1.5	0.000648406	0.129	0.719	0.263667	0.134	1.22	0.04578	TRHDE/ATXN7L3B
rs77220093	Imp	12	92635741	C	T	0.073	1.7	0.000148899	0.072	0.774	0.715381	0.073	1.37	0.005734	BTG1/CLLU1OS
rs10859684	Geno	12	94594559	C	T	0.677	1.47	0.000521774	0.694	1.2	0.147526	0.683	1.36	0.0002891	PLXNC1
rs17327792	Imp	12	97734976	T	C	0.071	1.57	0.000489806	0.077	0.97	0.964598	0.073	1.36	0.006558	NEDD1/RMST
rs7306479	Imp	12	99796670	C	T	0.218	1.46	2.85698e-05	0.219	0.999	0.54999	0.218	1.28	0.0002482	ANKS1B
rs12811060	Imp	12	108214942	G	A	0.188	1.51	0.000553928	0.18	1.354	0.223286	0.185	1.46	0.0005201	ASCL4/WSCD2
rs61934480	Imp	12	109855118	T	C	0.065	1.54	0.000670542	0.063	1.135	0.524401	0.064	1.4	0.002132	MYO1H
rs10774729	Imp	12	114444215	G	A	0.238	1.37	0.000503865	0.25	1.016	0.547002	0.242	1.24	0.001865	RBM19/TBX5
rs77092464	Imp	12	116986369	T	C	0.092	1.57	0.000548954	0.095	1.01	0.545842	0.093	1.37	0.001976	MED13L/MAP1LC3B2
rs10850679	Geno	12	117029965	A	G	0.269	1.41	2.99485e-05	0.274	0.973	0.802197	0.27	1.25	0.00173	MAP1LC3B2/C12orf49
rs2555268	Imp	12	119604290	C	T	0.927	0.59	0.000753451	0.926	1.161	0.301393	0.927	0.72	0.0437	SRRM4/HSPB8
rs11057556	Imp	12	124756435	C	G	0.155	0.63	0.000555151	0.142	0.892	0.699121	0.151	0.73	0.003102	FAM101A
rs4765539	Imp	12	124789832	G	C	0.078	1.84	4.33043e-06	0.088	1.151	0.647935	0.081	1.58	9.607e-05	FAM101A
rs1357418	Imp	12	126453425	G	A	0.071	1.67	4.11935e-05	0.072	1.023	0.839815	0.072	1.45	0.001902	TMEM132B/TMEM132C
rs11058421	Imp	12	126476547	A	G	0.051	1.88	0.000171594	0.051	0.892	0.623374	0.051	1.53	0.007887	TMEM132B/TMEM132C
rs36029186	Imp	12	130740198	C	G	0.134	1.49	0.000930233	0.138	0.846	0.385766	0.135	1.25	0.03815	FZD10/PIWIL1
rs2798259	Imp	13	22190518	T	A	0.577	0.68	0.000114777	0.58	0.983	0.441766	0.578	0.78	0.01035	MICU2/FGF9
rs2503345	Imp	13	22835400	T	C	0.074	1.78	0.000136558	0.072	0.674	0.125928	0.074	1.41	0.03928	FGF9/SGCG
rs111763934	Imp	13	25974202	C	A	0.055	1.78	0.000217813	0.052	0.75	0.226309	0.054	1.43	0.03027	ATP8A2
rs1923834	Geno	13	28360487	T	C	0.063	1.63	0.000794866	0.058	0.743	0.353822	0.061	1.32	0.03838	POLR1D/GSX1
rs3742112	Imp	13	28367275	C	G	0.329	1.39	0.000503252	0.346	1.12	0.38708	0.334	1.28	0.001064	GSX1
rs9314998	Imp	13	30746969	G	A	0.595	1.44	0.000361276	0.613	1.249	0.247778	0.601	1.36	0.0004292	UBL3/KATNAL1
rs73167043	Imp	13	31601829	A	G	0.052	1.95	0.000431013	0.052	0.772	0.374938	0.052	1.56	0.02602	TEX26/HSPH1
rs79077916	Imp	13	34390283	C	T	0.069	1.73	0.000634489	0.069	1.21	0.245923	0.069	1.55	0.0006598	STARD13-IT1/RFC3
rs58977136	Imp	13	38101408	G	A	0.051	1.75	0.000161033	0.055	0.711	0.327642	0.053	1.39	0.01785	CSNK1A1L/POSTN
rs74047695	Imp	13	38757450	G	C	0.084	1.75	0.00076817	0.08	1.115	0.880228	0.083	1.54	0.01057	TRPC4/UFM1
rs11838873	Geno	13	40951888	T	C	0.05	0.36	0.000265916	0.051	2.133	0.00982421	0.05	1.04	0.2002	COG6/FOXO1
rs9535789	Geno	13	52478985	C	T	0.748	0.7	0.000253818	0.749	0.909	0.252631	0.749	0.77	0.0003354	CCDC70/ATP7B
rs9538990	Imp	13	61539209	A	G	0.74	0.71	0.000699532	0.734	0.935	0.712463	0.738	0.78	0.003769	TDRD3/PCDH20
rs9570710	Imp	13	63297631	C	T	0.21	1.39	0.000544524	0.198	1.12	0.203846	0.207	1.29	0.0004542	PCDH20
rs10220192	Imp	13	67496520	C	T	0.109	0.57	0.00054878	0.124	0.633	0.0104567	0.114	0.59	1.713e-05	PCDH9
rs74405236	Imp	13	70963047	T	C	0.062	1.85	1.29748e-05	0.048	0.933	0.457662	0.057	1.59	0.002913	ATXN8OS/DACH1
rs117449444	Imp	13	71527466	G	C	0.105	1.7	0.000119336	0.105	1.12	0.540747	0.105	1.49	0.0006563	ATXN8OS/DACH1
rs4885001	Geno	13	72959394	T	C	0.706	0.7	0.000385841	0.701	1.131	0.587492	0.705	0.82	0.01384	DACH1/MZT1
rs2325497	Imp	13	73255317	T	C	0.748	1.53	0.000229464	0.755	1.218	0.351434	0.75	1.39	0.0005093	DACH1/MZT1
rs7991517	Imp	13	76254914	T	A	0.831	1.62	0.000417252	0.826	1.188	0.201921	0.829	1.42	0.0003629	LMO7
rs4885372	Imp	13	76572610	C	G	0.627	0.74	0.000207161	0.618	1.195	0.141353	0.624	0.87	0.04381	C13orf45/KCTD12
rs2807481	Imp	13	83598545	T	C	0.952	4.98	0.000173281	0.942	1.208	0.586305	0.949	2.02	0.0009917	SPRY2/SLITRK1
rs73251347	Imp	13	83868558	C	T	0.179	0.61	0.000775445	0.186	0.894	0.785624	0.181	0.71	0.004877	SPRY2/SLITRK1
rs112812320	Imp	13	92131059	G	A	0.212	1.46	0.000475986	0.222	1.216	0.167999	0.215	1.37	0.0003166	GPC5
rs1330470	Imp	13	92549622	C	T	0.28	0.6	0.000279508	0.263	0.944	0.933302	0.274	0.71	0.00495	GPC5
rs12854041	Imp	13	99304000	C	T	0.107	1.48	0.000495206	0.112	0.862	0.886822	0.108	1.25	0.007912	STK24/SLC15A1
rs9517448	Geno	13	99438618	C	A	0.131	1.56	0.000361384	0.14	1.424	0.0209349	0.134	1.51	2.315e-05	SLC15A1/DOCK9
rs9585279	Imp	13	100575855	A	G	0.252	1.37	0.00044178	0.256	1.003	0.900866	0.253	1.24	0.00713	CLYBL/ZIC5
rs540376	Imp	13	101934438	T	C	0.324	1.48	0.000223238	0.289	1.016	0.733749	0.313	1.31	0.006984	NALCN
rs12873521	Imp	13	101957405	T	C	0.305	0.72	0.000762435	0.321	1.103	0.972356	0.31	0.85	0.008543	NALCN
rs2065548	Geno	13	104153307	A	G	0.934	0.53	7.87808e-05	0.927	0.75	0.103013	0.932	0.6	3.886e-05	SLC10A2/DAOA
rs35528302	Imp	13	104237841	G	A	0.056	1.71	0.00090721	0.066	1.306	0.148107	0.059	1.55	0.0004578	SLC10A2/DAOA
rs11838415	Geno	13	105329468	G	A	0.085	1.57	0.000344308	0.077	1.135	0.380469	0.082	1.42	0.0007805	SLC10A2/DAOA
rs277857	Imp	13	109669143	T	G	0.951	0.51	0.000752625	0.955	0.848	0.641038	0.952	0.59	0.003269	MYO16
rs76574181	Imp	13	110862750	A	G	0.079	1.58	0.000808518	0.078	0.838	0.488883	0.078	1.33	0.02697	COL4A1
rs6492246	Imp	13	110869422	T	C	0.303	1.46	0.000706016	0.319	1.098	0.66154	0.308	1.32	0.003308	COL4A1
rs11617176	Imp	13	112088734	T	C	0.219	1.41	0.000326267	0.217	0.828	0.236553	0.219	1.2	0.03565	TEX29/SOX1
rs56184652	Imp	13	114801183	T	C	0.41	0.7	0.000570382	0.409	1.026	0.522562	0.41	0.81	0.02036	RASA3
rs2093075	Imp	14	29031632	C	G	0.384	0.72	0.000870325	0.372	0.985	0.853143	0.38	0.81	0.006213	NOVA1/FOXG1
rs61978360	Imp	14	30592388	G	A	0.059	2.02	0.000221718	0.054	1.473	0.208851	0.057	1.84	0.0002306	PRKD1
rs7159569	Imp	14	31393779	C	T	0.328	0.7	0.00061962	0.331	0.95	0.859061	0.329	0.78	0.009696	STRN3
rs10133551	Imp	14	33282232	C	T	0.406	1.32	0.000507267	0.412	0.988	0.771711	0.408	1.2	0.01048	AKAP6
rs34545629	Imp	14	33776047	T	C	0.079	1.61	0.000208007	0.071	0.78	0.491986	0.077	1.34	0.01249	NPAS3
rs9743596	Imp	14	40130494	C	A	0.112	0.57	0.00073889	0.114	1.178	0.366104	0.113	0.8	0.03563	FBXO33/LRFN5
rs8011819	Geno	14	51216889	T	C	0.472	0.7	0.000277235	0.488	1.012	0.802567	0.477	0.81	0.00674	NIN
rs4901119	Geno	14	51862526	G	A	0.572	0.73	0.000229762	0.593	1.074	0.35148	0.579	0.83	0.01995	TMX1/FRMD6
rs12590592	Imp	14	72589451	T	G	0.545	0.73	0.000184312	0.547	1.073	0.699748	0.546	0.84	0.006775	RGS6
rs2003747	Imp	14	81927040	C	T	0.05	1.86	0.000575463	0.057	1.186	0.624765	0.052	1.59	0.002586	STON2/SEL1L
rs76308563	Imp	14	84831687	A	G	0.075	1.78	0.000657165	0.086	0.754	0.132948	0.078	1.4	0.07885	SEL1L/FLRT2
rs12590555	Imp	14	86284697	C	T	0.94	0.59	0.000613505	0.929	1.141	0.649932	0.937	0.72	0.01559	FLRT2/GALC
rs75685422	Imp	14	95752666	T	C	0.117	0.45	4.54186e-05	0.106	1.002	0.865676	0.113	0.67	0.001886	CLMN
rs114570512	Imp	14	95913198	T	C	0.089	0.49	0.000336171	0.095	0.734	0.258596	0.091	0.59	0.0004312	SYNE3
rs4905804	Imp	14	99649030	G	A	0.299	1.42	0.000236544	0.293	0.956	0.365927	0.297	1.24	0.01936	BCL11B
rs11622053	Imp	14	101648535	A	G	0.846	0.56	1.93487e-06	0.839	0.805	0.283121	0.844	0.64	1.031e-05	MEG9/DIO3
rs118026124	Imp	14	104908761	A	G	0.075	1.67	0.000973141	0.065	0.754	0.367931	0.072	1.39	0.04106	C14orf144/TMEM179
rs4457938	Imp	14	105539859	C	T	0.695	0.69	0.000521489	0.668	0.942	0.594587	0.686	0.78	0.00221	GPR132/JAG2
rs11630824	Geno	15	24322045	T	C	0.082	1.88	1.30915e-06	0.082	1.248	0.0882806	0.082	1.64	1.168e-06	PWRN4/PWRN2
rs12905662	Imp	15	24466070	C	T	0.531	1.38	0.000171432	0.534	1.019	0.994076	0.532	1.24	0.003034	PWRN2/PWRN3
rs11638717	Imp	15	25698697	G	A	0.317	0.73	0.000876396	0.313	0.791	0.0321531	0.315	0.75	8.118e-05	UBE3A/ATP10A
rs74007232	Imp	15	26383723	G	A	0.16	0.62	0.000602367	0.141	1.121	0.189298	0.154	0.81	0.05834	ATP10A/GABRB3
rs897174	Imp	15	27469922	G	A	0.17	0.59	0.000104411	0.163	1.198	0.137534	0.168	0.81	0.03228	GABRG3
rs12591927	Geno	15	31833911	A	G	0.11	1.49	0.000338447	0.104	1.374	0.299747	0.108	1.45	0.0005368	OTUD7A
rs12591935	Imp	15	32913030	C	G	0.349	0.65	0.00054393	0.347	1.104	0.474257	0.348	0.79	0.02245	ARHGAP11A
rs62001766	Imp	15	32919594	A	G	0.167	1.46	0.000822997	0.155	1.307	0.202129	0.163	1.4	0.0006252	ARHGAP11A
rs17817518	Geno	15	33990620	A	G	0.414	0.68	9.22029e-05	0.403	0.931	0.995697	0.411	0.76	0.002049	RYR3
rs80015591	Imp	15	52408092	C	T	0.086	0.34	0.000361764	0.092	0.745	0.21055	0.088	0.51	0.0003429	BCL2L10/GNB5
rs72740282	Imp	15	53072430	A	G	0.056	1.74	0.000413727	0.057	0.943	0.851141	0.056	1.44	0.007686	ONECUT1
rs11631958	Geno	15	58116908	A	G	0.221	1.45	0.000809595	0.218	0.819	0.289027	0.22	1.2	0.04717	POLR2M/ALDH1A2
rs11071553	Imp	15	61042066	A	C	0.2	0.65	0.000478711	0.221	1.014	0.938048	0.207	0.78	0.006877	RORA
rs117021912	Imp	15	61074036	G	A	0.081	1.6	0.000721648	0.082	0.797	0.335323	0.081	1.31	0.03851	RORA
rs34551405	Imp	15	62872626	T	C	0.051	1.97	0.000321551	0.064	0.598	0.0315615	0.055	1.44	0.1314	TLN2
rs113168916	Imp	15	65181556	T	C	0.094	0.41	9.93041e-05	0.093	1.015	0.773488	0.094	0.63	0.003874	PLEKHO2/ANKDD1A
rs117569451	Imp	15	65463765	G	A	0.097	1.77	0.000469662	0.106	1.201	0.195498	0.1	1.53	0.0003819	CLPX
rs17249287	Imp	15	68317407	G	A	0.256	1.39	0.000496494	0.251	0.931	0.360976	0.254	1.21	0.02925	RNU6-1/PIAS1
rs2415041	Imp	15	69648733	C	A	0.952	0.49	0.000312997	0.955	0.812	0.545003	0.953	0.57	0.001319	PAQR5
rs7164769	Imp	15	70705298	C	T	0.444	1.33	0.000966446	0.435	0.952	0.666425	0.441	1.18	0.01962	TLE3/UACA
rs4886820	Imp	15	74267320	C	T	0.611	0.7	7.33405e-05	0.606	0.907	0.261103	0.609	0.77	0.0001359	LOXL1/STOML1
rs2959860	Imp	15	76454335	T	C	0.304	0.68	0.000454891	0.293	0.921	0.613913	0.3	0.76	0.002125	C15orf27
rs79229304	Imp	15	80734748	A	G	0.136	1.57	0.000315746	0.121	0.87	0.156852	0.131	1.33	0.04946	ARNT2
rs112470015	Imp	15	85824802	T	C	0.069	1.6	0.00049458	0.062	1.347	0.192063	0.066	1.52	0.0003888	GOLGA6L3/AKAP13
rs1878327	Geno	15	89450546	T	C	0.62	0.68	6.4631e-05	0.612	1.113	0.312151	0.617	0.81	0.01161	MFGE8
rs2532110	Imp	15	91390400	A	G	0.191	0.62	0.000693129	0.178	0.811	0.173677	0.187	0.69	0.000448	BLM/FURIN
rs2238359	Imp	15	92667377	G	A	0.653	1.45	0.000935479	0.666	0.992	0.799994	0.657	1.25	0.005736	SLCO3A1
rs12907625	Geno	15	96898166	C	T	0.297	1.33	0.000792603	0.303	0.859	0.301892	0.299	1.15	0.04479	NR2F2/SPATA8
rs62025507	Imp	15	98097013	A	G	0.111	1.58	0.000995797	0.113	1.092	0.719923	0.112	1.42	0.01771	SPATA8/ARRDC4
rs72767067	Imp	15	98226564	C	A	0.067	1.64	0.000164128	0.075	0.763	0.274002	0.07	1.34	0.02178	SPATA8/ARRDC4
rs2177030	Imp	15	99518050	C	T	0.072	1.58	0.000613605	0.076	0.951	0.828612	0.073	1.35	0.01033	PGPEP1L
rs28696125	Imp	15	100760271	C	T	0.279	0.69	0.000711074	0.279	1.054	0.840357	0.279	0.81	0.01102	ADAMTS17
rs216054	Imp	15	101255721	A	G	0.781	1.55	0.000187823	0.787	0.971	0.946022	0.783	1.28	0.002851	ASB7/ALDH1A3
rs9929621	Geno	16	679412	T	C	0.21	0.63	0.000509242	0.218	0.88	0.789172	0.213	0.73	0.003704	WFIKKN1
rs57107859	Imp	16	3455744	T	C	0.064	1.64	0.000658515	0.067	1.07	0.589477	0.065	1.44	0.002567	NAA60/ZNF174
rs11866945	Imp	16	6761389	G	A	0.051	0.36	0.000377581	0.054	0.738	0.244973	0.052	0.53	0.0004372	RBFOX1
rs1532930	Imp	16	8089203	T	C	0.471	1.38	0.000193081	0.481	1.142	0.234555	0.474	1.28	0.0002439	RBFOX1/TMEM114
rs1109083	Imp	16	8580279	G	A	0.733	1.56	9.88544e-05	0.714	0.871	0.364972	0.727	1.22	0.01213	RBFOX1/TMEM114
rs7196336	Imp	16	10473288	T	C	0.629	0.75	0.000825056	0.63	0.897	0.970114	0.629	0.8	0.007883	ATF7IP2
rs2041733	Geno	16	11229589	C	T	0.544	0.7	8.45623e-05	0.522	0.752	0.00656038	0.537	0.71	1.832e-06	CLEC16A
rs2059819	Geno	16	12749671	T	G	0.185	0.67	0.0004199	0.18	0.869	0.43196	0.183	0.75	0.001105	SNX29/CPPED1
rs7186128	Geno	16	16957915	A	G	0.717	1.49	0.00089906	0.719	0.888	0.13944	0.717	1.22	0.08829	NPIPA7/XYLT1
rs4787690	Geno	16	25097500	G	T	0.473	0.74	0.000810609	0.471	1.116	0.682319	0.472	0.86	0.01705	ARHGAP17/LCMT1
rs553745	Imp	16	49518426	T	A	0.215	0.62	0.000334778	0.188	0.969	0.736449	0.207	0.74	0.008855	C16orf78/ZNF423
rs6500361	Geno	16	51064987	G	A	0.77	0.72	0.000457831	0.765	0.783	0.043696	0.768	0.74	6.259e-05	CYLD/SALL1
rs9934971	Imp	16	51326478	A	C	0.146	0.63	0.00097131	0.148	1.071	0.945323	0.147	0.8	0.01059	SALL1/C16orf97
rs7186521	Imp	16	53792922	G	A	0.46	0.75	0.000843424	0.451	1.042	0.875901	0.457	0.84	0.006423	FTO
rs9939811	Geno	16	53850868	C	T	0.229	0.61	2.55655e-05	0.215	0.839	0.393411	0.225	0.7	0.0001223	FTO
rs12931755	Imp	16	55000195	G	A	0.198	1.45	0.000344362	0.198	0.843	0.156697	0.198	1.21	0.05159	IRX5/IRX6
rs7187258	Geno	16	55500220	G	A	0.601	1.41	0.00044301	0.595	1.143	0.418999	0.599	1.3	0.001095	MMP2
rs7189881	Imp	16	57646504	T	C	0.517	1.29	0.000906116	0.519	1.296	0.0764992	0.517	1.29	0.0002115	GPR56
rs75989490	Imp	16	62329669	T	C	0.083	0.48	0.000693667	0.073	1.019	0.854227	0.08	0.68	0.005355	CDH8/CDH11
rs73592298	Imp	16	65936853	A	G	0.075	1.96	3.46916e-05	0.074	0.512	0.11247	0.075	1.43	0.02244	CDH11/CDH5
rs113912192	Imp	16	66874514	T	C	0.061	0.43	0.000681135	0.054	1.292	0.703669	0.059	0.71	0.01464	NAE1
rs74461960	Imp	16	70805801	T	C	0.075	0.44	0.000181214	0.065	0.809	0.501391	0.072	0.57	0.0007711	VAC14
rs9938355	Geno	16	73544257	T	G	0.41	1.3	0.000840658	0.397	0.963	0.892194	0.406	1.17	0.00666	C16orf47/PSMD7
rs13330473	Imp	16	76651043	C	T	0.11	1.67	0.000710876	0.109	1.079	0.596294	0.109	1.44	0.002765	CNTNAP4/MON1B
rs74489952	Imp	16	79549621	A	C	0.063	1.87	0.000782659	0.066	1.319	0.0769698	0.064	1.65	0.0001876	WWOX/MAF
rs6564928	Imp	16	81917099	T	G	0.24	1.37	0.000577556	0.248	0.632	0.00492738	0.242	1.08	0.3279	PLCG2
rs8051215	Imp	16	82280093	C	T	0.319	1.39	0.000592582	0.331	0.842	0.946577	0.323	1.17	0.00602	MPHOSPH6/CDH13
rs8060065	Imp	16	83940302	C	G	0.061	1.87	0.00054204	0.072	0.952	0.760997	0.064	1.49	0.003593	MLYCD
rs8049209	Imp	16	84130286	G	C	0.058	1.77	0.000111009	0.062	1.246	0.161897	0.059	1.57	9.38e-05	MBTPS1
rs4782710	Imp	16	85538452	A	C	0.404	1.43	0.000708197	0.385	0.631	0.0208657	0.398	1.13	0.2137	FAM92B/GSE1
rs9931938	Imp	16	87272970	C	T	0.423	0.74	0.000138466	0.446	1.168	0.33801	0.43	0.87	0.0159	C16orf95
rs113885476	Imp	16	87653391	C	T	0.081	1.66	0.000173901	0.084	1.212	0.462208	0.082	1.5	0.00065	JPH3
rs8074778	Imp	17	122770	G	A	0.366	1.43	0.000885855	0.375	0.89	0.428346	0.369	1.22	0.03314	RPH3AL
rs7218543	Imp	17	518120	A	G	0.947	0.55	0.000127381	0.938	1.176	0.419946	0.945	0.7	0.01171	VPS53
rs12150519	Imp	17	7201681	A	G	0.114	1.62	0.000185085	0.115	0.917	0.599487	0.114	1.37	0.008769	YBX2/EIF5A
rs7221869	Imp	17	8570881	C	T	0.227	1.41	0.000317932	0.226	1.031	0.582305	0.227	1.26	0.001501	MYH10/CCDC42
rs8076464	Imp	17	14195021	T	C	0.231	1.42	0.000599556	0.218	1.109	0.651329	0.227	1.3	0.002869	CDRT15/HS3ST3B1
rs61215166	Imp	17	16400800	T	A	0.061	1.78	0.000263062	0.067	0.898	0.940014	0.063	1.44	0.003495	FAM211A/ZNF287
rs7214245	Imp	17	17591759	A	T	0.501	0.68	7.00957e-05	0.48	1.042	0.95477	0.494	0.8	0.001543	RAI1
rs16970011	Imp	17	32866401	C	T	0.064	0.43	0.000934429	0.06	1.291	0.274611	0.063	0.79	0.05318	CCL1/C17orf102
rs3764423	Imp	17	38643780	A	G	0.157	1.39	0.000947522	0.171	0.754	0.306781	0.161	1.14	0.0484	TNS4
rs2586452	Imp	17	48400953	C	T	0.246	1.44	0.000504164	0.235	1.258	0.0362059	0.242	1.37	5.569e-05	TMEM92/XYLT2
rs994626	Imp	17	52282796	G	A	0.785	0.67	7.36892e-05	0.796	0.946	0.616275	0.789	0.75	0.0006016	KIF2B/TOM1L1
rs112217230	Imp	17	54723977	C	T	0.128	1.61	0.000736157	0.132	0.854	0.411975	0.129	1.32	0.0313	NOG/C17orf67
rs10515149	Imp	17	55856050	G	C	0.067	0.44	0.000494189	0.066	1.064	0.513318	0.066	0.69	0.01922	CCDC182/MRPS23
rs61160858	Imp	17	74913447	T	C	0.099	0.58	0.000788988	0.096	1.295	0.147735	0.098	0.83	0.07982	MGAT5B
rs11871435	Geno	17	77311233	T	C	0.062	1.98	1.48239e-05	0.068	0.983	0.864932	0.064	1.61	0.0004378	RBFOX3
rs73425308	Imp	17	77372751	A	G	0.07	1.72	0.000441992	0.07	0.958	0.837019	0.07	1.45	0.003802	RBFOX3
rs7502981	Imp	17	78994732	C	G	0.51	1.47	0.000866437	0.512	1.315	0.032901	0.511	1.41	8.226e-05	CHMP6/BAIAP2
rs58821976	Imp	18	1046827	T	C	0.177	0.65	0.000800182	0.171	0.986	0.799648	0.175	0.76	0.005157	ADCYAP1/METTL4
rs78910545	Imp	18	1136075	G	A	0.103	0.55	0.000391932	0.083	0.749	0.304833	0.097	0.62	0.0006155	ADCYAP1/METTL4
rs8092907	Imp	18	3039373	T	C	0.259	0.66	0.000538858	0.259	1.29	0.150699	0.259	0.88	0.06574	LPIN2/MYOM1
rs28794896	Imp	18	3144148	A	G	0.081	0.41	0.000131748	0.074	0.629	0.0814425	0.079	0.49	4.412e-05	MYOM1
rs1917924	Geno	18	5755984	G	A	0.867	1.88	0.000116976	0.875	1.339	0.0991701	0.869	1.64	5.118e-05	EPB41L3/TMEM200C
rs7240022	Imp	18	5777353	C	G	0.522	0.71	0.00021177	0.529	1.055	0.573738	0.524	0.82	0.01014	EPB41L3/TMEM200C
rs8099410	Geno	18	7677548	G	A	0.178	1.52	0.000703221	0.179	0.814	0.527692	0.178	1.25	0.02264	PTPRM
rs2865479	Imp	18	11256265	T	A	0.828	0.71	0.000707291	0.812	1.245	0.25875	0.822	0.85	0.04866	PIEZO2/GNAL
rs524956	Geno	18	11557161	C	T	0.347	0.73	0.000594073	0.358	0.964	0.858556	0.35	0.82	0.004882	PIEZO2/GNAL
rs8083786	Imp	18	12881361	G	A	0.148	1.55	0.000249445	0.157	0.796	0.162366	0.151	1.27	0.04297	PTPN2
rs12964262	Imp	18	20700447	G	A	0.485	1.41	0.000298771	0.517	0.93	0.636699	0.495	1.21	0.001693	RBBP8/CABLES1
rs1667283	Imp	18	29223621	T	C	0.451	0.71	7.18852e-06	0.462	0.903	0.150044	0.454	0.77	9.792e-06	B4GALT6
rs41306970	Imp	18	30353163	T	C	0.065	1.77	0.000267355	0.066	1.087	0.737492	0.065	1.53	0.002088	KLHL14/CCDC178
rs4305156	Imp	18	30869496	C	T	0.741	0.72	0.000891311	0.746	0.812	0.0544558	0.743	0.75	0.0001435	CCDC178
rs355321	Geno	18	33065289	C	T	0.807	0.69	0.000645588	0.808	0.917	0.594409	0.807	0.76	0.002568	INO80C
rs3747899	Geno	18	34803165	G	A	0.151	1.55	0.000269161	0.16	0.923	0.618871	0.154	1.31	0.01038	KIAA1328
rs79456986	Imp	18	38504636	C	T	0.092	0.49	0.000771281	0.097	1.619	0.0293859	0.094	0.89	0.1914	PIK3C3
rs77169990	Imp	18	41214033	T	C	0.053	1.83	0.000323907	0.049	0.681	0.259426	0.052	1.45	0.03261	SYT4/SETBP1
rs11875988	Geno	18	47205432	G	A	0.472	1.36	9.7232e-05	0.464	0.887	0.139705	0.47	1.16	0.0308	LIPG/ACAA2
rs8087089	Imp	18	47458675	C	G	0.335	1.41	0.000310861	0.326	1.012	0.933274	0.332	1.25	0.005294	MYO5B
rs1145240	Imp	18	49953866	G	A	0.25	1.41	0.000433221	0.254	1.019	0.678904	0.251	1.26	0.01185	DCC
rs35133835	Imp	18	52716804	T	G	0.105	1.6	0.000505018	0.099	0.774	0.123255	0.103	1.32	0.0735	CCDC68/TCF4
rs7233277	Imp	18	52741518	A	G	0.556	0.73	0.000712673	0.558	1.069	0.380688	0.557	0.83	0.03353	CCDC68/TCF4
rs4560009	Imp	18	59320031	C	A	0.649	1.39	0.00057667	0.657	1.043	0.555219	0.652	1.25	0.002107	CDH20/RNF152
rs11873127	Imp	18	60253685	T	C	0.062	1.7	0.000444991	0.068	1.224	0.0344843	0.064	1.52	4.726e-05	ZCCHC2
rs1243056	Imp	18	61508463	G	A	0.05	2.02	1.1998e-05	0.046	1.267	0.0788562	0.049	1.76	5.879e-06	SERPINB7/SERPINB2
rs1243064	Imp	18	61513975	A	T	0.257	1.65	1.56515e-07	0.252	1.212	0.0275214	0.255	1.47	4.155e-08	SERPINB7/SERPINB2
rs557512	Imp	18	62893102	G	A	0.61	0.71	0.000302457	0.626	1.044	0.180788	0.615	0.81	0.04327	SERPINB8/CDH7
rs11664796	Imp	18	63009510	C	T	0.065	1.73	0.000224877	0.055	0.832	0.416825	0.062	1.45	0.01615	SERPINB8/CDH7
rs4891681	Imp	18	66062530	T	C	0.873	1.95	0.00015618	0.894	0.707	0.0806407	0.88	1.19	0.05723	DSEL/TMX3
rs11661553	Imp	18	67544637	A	T	0.431	1.38	0.000991877	0.432	1.049	0.810729	0.431	1.25	0.006125	CD226
rs9953802	Imp	18	69340619	C	G	0.89	0.61	0.000416251	0.899	0.507	0.00363338	0.893	0.58	4.832e-06	GTSCR1/CBLN2
rs17772575	Imp	18	71441531	G	A	0.084	0.54	0.000916573	0.081	0.911	0.4446	0.083	0.67	0.002057	RP11-169F17.1/FBXO15
rs2850508	Geno	18	71659493	G	A	0.055	1.89	0.000283253	0.065	0.736	0.370163	0.058	1.43	0.02106	RP11-169F17.1/FBXO15
rs1865720	Imp	18	73167088	T	C	0.588	0.75	0.000718612	0.585	1.061	0.308188	0.587	0.85	0.04174	SMIM21/ZNF516
rs62096860	Imp	18	77151867	T	C	0.142	1.52	0.000342468	0.137	0.809	0.386174	0.14	1.26	0.02223	ATP9B/NFATC1
rs1051978	Geno	18	77170477	A	C	0.099	1.77	2.74747e-06	0.093	0.599	0.0914425	0.097	1.37	0.007978	NFATC1
rs144468958	Imp	19	305001	C	T	0.109	1.54	0.000746362	0.119	0.768	0.501946	0.112	1.24	0.02496	PPAP2C/MIER2
rs8100665	Geno	19	311037	G	A	0.377	1.35	0.000414522	0.395	0.954	0.770332	0.383	1.2	0.00307	MIER2
rs76861062	Imp	19	1802942	T	C	0.05	1.68	0.000940812	0.044	0.81	0.151595	0.048	1.44	0.08514	ATP8B3
rs4806849	Geno	19	2447215	A	C	0.18	1.46	0.000296864	0.199	0.908	0.601689	0.186	1.25	0.01147	LMNB2
rs72976986	Imp	19	4050424	A	G	0.184	1.54	0.000125809	0.172	1.043	0.998194	0.18	1.37	0.002539	ZBTB7A
rs72979240	Imp	19	5461785	G	A	0.05	0.31	0.000815597	0.044	0.982	0.987875	0.048	0.57	0.008611	ZNRF4/TINCR
rs35073164	Imp	19	7079326	C	A	0.079	0.38	0.000328913	0.074	1.123	0.741645	0.078	0.67	0.008653	ZNF557
rs10407491	Imp	19	9104899	A	G	0.171	0.56	0.000176648	0.179	1.216	0.382348	0.174	0.79	0.01572	MUC16/OR1M1
rs6512230	Geno	19	17975630	A	G	0.308	1.4	8.91019e-05	0.306	1.016	0.675911	0.307	1.26	0.004674	RPL18A/SLC5A5
rs273510	Imp	19	18223350	G	A	0.289	0.69	0.000172789	0.286	1.279	0.0260402	0.288	0.87	0.1126	MAST3
rs78220951	Imp	19	23402877	G	T	0.083	1.87	0.00017925	0.085	1.136	0.979955	0.084	1.59	0.003014	ZNF730/ZNF91
rs1821290	Imp	19	24081570	T	C	0.904	0.57	0.000330071	0.895	1.253	0.063584	0.901	0.72	0.09202	ZNF681/ZNF726
rs4805364	Imp	19	29786472	A	G	0.479	0.67	6.4365e-05	0.449	1.215	0.098872	0.469	0.84	0.03313	UQCRFS1/VSTM2B
rs11083571	Imp	19	41346099	T	C	0.735	1.45	0.000698621	0.751	1.298	0.366087	0.74	1.39	0.001251	EGLN2/CYP2A6
rs7508101	Imp	19	48280954	C	A	0.94	0.55	0.000821689	0.942	0.977	0.862787	0.94	0.65	0.006119	GLTSCR2/SEPW1
rs78120516	Imp	19	49411198	G	T	0.077	1.86	0.000586815	0.07	1.402	0.182745	0.075	1.71	0.000418	NUCB1
rs890842	Imp	19	52840962	T	C	0.773	0.65	3.86846e-06	0.761	1.019	0.836391	0.769	0.76	0.0001668	ZNF610
rs12974142	Imp	19	52895166	G	A	0.112	1.72	2.20459e-05	0.102	1.205	0.197455	0.108	1.55	3.533e-05	ZNF880/ZNF528
rs4801202	Imp	19	57674178	G	C	0.814	0.63	0.00056304	0.791	1.254	0.256139	0.807	0.79	0.04374	DUXA
rs6051492	Geno	20	346751	G	A	0.49	0.72	0.000374802	0.494	0.974	0.437315	0.491	0.81	0.001037	NRSN2/TRIB3
rs3746804	Geno	20	744415	A	G	0.216	0.62	0.000215131	0.218	0.88	0.263505	0.217	0.72	0.0003139	SLC52A3
rs404678	Geno	20	5024237	T	C	0.615	1.4	0.000321602	0.638	0.925	0.368889	0.622	1.2	0.02263	SLC23A2/TMEM230
rs6085822	Imp	20	6981438	A	T	0.063	1.89	0.000777836	0.056	1.555	0.46706	0.061	1.78	0.001969	BMP2/HAO1
rs75145533	Imp	20	7550795	G	A	0.059	1.81	0.000180641	0.059	1.21	0.776076	0.059	1.62	0.005536	BMP2/HAO1
rs17773212	Imp	20	15143794	G	A	0.071	0.43	0.000606234	0.077	1.606	0.0109021	0.073	0.9	0.2577	MACROD2
rs7262442	Geno	20	17631573	A	C	0.382	0.72	0.00053348	0.382	0.889	0.0427844	0.382	0.78	7.008e-05	RRBP1
rs17664036	Geno	20	21220212	C	T	0.059	1.7	0.000742313	0.062	0.953	0.849066	0.06	1.44	0.01109	PLK1S1
rs2424608	Imp	20	23969285	G	C	0.917	2.03	0.000552719	0.929	0.934	0.610008	0.921	1.42	0.01613	GGTLC1
rs36073746	Imp	20	38535375	T	C	0.052	1.74	0.000660263	0.056	0.748	0.152849	0.053	1.38	0.07164	DHX35/MAFB
rs78177773	Imp	20	38702714	G	T	0.132	1.59	0.000667359	0.137	0.957	0.910488	0.134	1.35	0.005974	DHX35/MAFB
rs62208714	Imp	20	40905826	T	C	0.062	1.76	0.000638843	0.07	0.95	0.920329	0.065	1.46	0.008596	PTPRT
rs6019199	Imp	20	47087120	C	T	0.199	0.59	0.000348638	0.212	1.293	0.0678857	0.203	0.84	0.09071	SULF2/PREX1
rs144694238	Imp	20	47401500	C	G	0.052	2.18	6.32171e-05	0.046	1.083	0.870938	0.05	1.83	0.002283	PREX1
rs4254558	Imp	20	51454158	C	G	0.594	1.47	0.000875084	0.582	0.816	0.0391444	0.59	1.17	0.177	ZFP64/TSHZ2
rs111499854	Imp	20	51910502	T	C	0.097	0.48	0.000186841	0.102	0.768	0.339551	0.098	0.6	0.0004138	TSHZ2
rs79008227	Imp	20	53882657	T	G	0.077	1.88	0.00083856	0.084	1.025	0.909464	0.079	1.55	0.006924	DOK5/CBLN4
rs113276895	Imp	20	56055038	A	T	0.062	0.36	0.000452776	0.053	1.138	0.848676	0.059	0.64	0.008175	RBM38/CTCFL
rs11086667	Imp	20	57754923	T	C	0.091	1.76	4.49042e-05	0.089	1.072	0.644139	0.09	1.5	0.0004677	SLMO2/ZNF831
rs164472	Imp	20	59061864	G	A	0.821	1.61	0.000294864	0.843	0.947	0.492365	0.828	1.31	0.01519	C20orf197/CDH4
rs3810492	Geno	20	62219740	A	G	0.233	0.69	0.000795421	0.225	1.049	0.636952	0.23	0.82	0.01872	GMEB2
rs7266156	Imp	20	62846376	G	A	0.243	0.64	0.0002791	0.234	1.182	0.197864	0.24	0.83	0.03857	MYT1
rs76914408	Imp	21	15827922	A	T	0.121	0.47	0.000152576	0.122	0.662	0.0786353	0.121	0.54	4.779e-05	HSPA13/SAMSN1
rs17240955	Imp	21	16124662	A	T	0.077	1.61	0.00033153	0.073	0.78	0.436287	0.076	1.33	0.01891	AF165138.7/NRIP1
rs73332306	Imp	21	22457345	C	T	0.108	1.57	0.000118584	0.107	0.984	0.754063	0.108	1.36	0.001262	NCAM2
rs2257678	Imp	21	25780193	T	A	0.229	1.43	0.000185486	0.218	1.426	0.0137973	0.226	1.43	8.142e-06	NCAM2/7SK
rs1541289	Imp	21	25922448	A	C	0.118	1.69	4.18867e-05	0.124	1.025	0.638844	0.12	1.44	0.0004383	7SK
rs150761	Imp	21	27810723	A	G	0.661	1.55	0.000280379	0.629	0.985	0.994656	0.65	1.29	0.004166	APP/CYYR1
rs17609611	Imp	21	33682294	T	C	0.059	1.79	0.000606157	0.06	0.815	0.511458	0.059	1.45	0.02167	MRAP
rs2409485	Imp	21	34670242	T	G	0.5	1.4	0.000904911	0.501	1.065	0.543917	0.5	1.27	0.002811	IL10RB/IFNAR1
rs9636882	Imp	21	35916855	G	T	0.192	1.46	0.000284994	0.19	0.858	0.419853	0.191	1.24	0.01823	RCAN1
rs35376875	Imp	21	37375656	T	C	0.07	1.82	0.000192098	0.069	1.277	0.146228	0.07	1.61	0.0001269	RUNX1
rs858026	Geno	21	39104499	A	G	0.427	0.69	0.000121751	0.421	1.077	0.627793	0.425	0.81	0.006378	KCNJ6
rs77907615	Imp	21	39134980	T	C	0.102	0.51	0.000269133	0.104	0.696	0.329885	0.103	0.58	0.0005207	KCNJ6
rs8132804	Imp	21	43034973	C	G	0.308	1.39	0.000939235	0.308	1.024	0.700739	0.308	1.25	0.004479	TMPRSS2/RIPK4
rs62214332	Imp	21	46974932	A	G	0.317	0.64	6.01573e-05	0.313	1.226	0.116445	0.316	0.84	0.02833	SLC19A1/PCBP3
rs8128676	Geno	21	46983224	G	A	0.8	0.69	0.000234907	0.801	1.045	0.946999	0.8	0.79	0.003304	SLC19A1/PCBP3
rs12170086	Imp	22	18322790	G	A	0.06	1.9	0.00078611	0.057	0.818	0.754995	0.059	1.5	0.0142	MICAL3
rs8141593	Imp	22	20216156	C	T	0.217	1.38	0.000738482	0.234	0.997	0.79369	0.222	1.23	0.004814	ZDHHC8/RTN4R
rs55784528	Imp	22	22291925	A	G	0.081	1.53	0.000654648	0.08	0.592	0.0330972	0.081	1.23	0.1703	PPM1F
rs1008673	Geno	22	25994013	A	G	0.775	1.51	0.0003777	0.776	1.346	0.213049	0.775	1.44	0.0003606	ADRBK2
rs16986747	Geno	22	27466842	A	G	0.263	0.68	0.00094388	0.265	1.074	0.706382	0.264	0.82	0.01768	MIAT/MN1
rs135183	Imp	22	34492542	C	T	0.801	1.66	0.000642809	0.816	0.903	0.434099	0.806	1.29	0.02738	LARGE-IT1/ISX
rs6000550	Imp	22	37463450	T	C	0.178	1.39	0.000564859	0.194	0.879	0.325885	0.183	1.21	0.03483	TMPRSS6
rs6519064	Geno	22	37847465	A	G	0.192	0.61	0.000300913	0.207	0.943	0.881203	0.197	0.74	0.003294	ELFN2/MFNG
rs5750761	Geno	22	39575692	A	C	0.596	1.45	5.99262e-05	0.571	1.35	0.00865849	0.588	1.41	1.767e-06	CBX7/PDGFB
rs5750764	Imp	22	39585424	T	G	0.329	1.33	0.000814174	0.34	0.989	0.82559	0.332	1.2	0.00556	CBX7/PDGFB
rs2267441	Imp	22	42278566	C	T	0.118	0.61	0.000793222	0.126	0.924	0.99544	0.121	0.74	0.008314	SREBF2
rs9623589	Imp	22	42817652	G	T	0.285	0.69	0.000693705	0.278	0.922	0.471031	0.282	0.77	0.001835	NFAM1
rs130318	Geno	22	44476064	C	T	0.582	0.7	0.000375887	0.563	0.986	0.945058	0.576	0.79	0.005804	PARVB
rs17542188	Geno	22	45276346	T	C	0.409	0.77	0.000766484	0.405	1.148	0.270995	0.408	0.89	0.04864	ARHGAP8/PHF21B
rs74612506	Imp	22	48333787	G	A	0.056	1.89	0.000204089	0.06	1.404	0.071036	0.057	1.71	5.404e-05	TBC1D22A/FAM19A5
rs117514024	Imp	22	49534383	T	G	0.203	1.43	0.000272681	0.196	1.23	0.463865	0.201	1.36	0.000906	FAM19A5/C22orf34
rs111249398	Imp	22	50881443	T	A	0.184	1.54	0.00026857	0.179	1.126	0.356168	0.182	1.37	0.000585	PPP6R2
GOFA, Genetics of Food Allergy study; EA, effect allele; AA, alternative allele; AF, effect allele frequency; OR, odds ratio.
a Genomic positions were based on human genome reference assembly GRCh37.p13.

## Sheet: SupplementaryData1c
Supplementary Data 1c Top associated loci (P < 1 x 10-3 in the discovery set) for peanut allergy
Peanut allergy						GOFA discovery set			GOFA replication set			Meta-analysis
SNP ID	Status	Chr	Positiona	EA	AA	AF	OR	P value	AF	OR	P value	AF	OR	P value	Gene region
rs12567869	Imp	1	2774381	A	G	0.179	0.58	0.000666879	0.185	1.001	0.876089	0.181	0.72	0.004324	TTC34/ACTRT2
rs2250248	Imp	1	6197895	C	G	0.051	1.9	0.000195519	0.051	0.632	0.37848	0.051	1.53	0.01209	CHD5
rs555027	Geno	1	10901907	T	C	0.092	1.67	0.00061703	0.093	0.828	0.856543	0.093	1.4	0.007494	CASZ1/C1orf127
rs10927575	Imp	1	13785516	C	G	0.13	1.61	0.00075017	0.119	1.334	0.2617	0.126	1.53	0.0006948	PRAMEF20/LRRC38
rs2940312	Imp	1	13808914	G	C	0.462	0.61	0.000644238	0.459	0.728	0.124585	0.461	0.64	0.0002455	LRRC38
rs12029464	Imp	1	15425957	G	T	0.091	2.08	0.000205345	0.099	1.265	0.434463	0.094	1.79	0.0005203	KAZN
rs11203336	Imp	1	17556087	T	G	0.268	1.39	0.000784641	0.292	0.799	0.123094	0.276	1.17	0.06788	PADI1
rs1890788	Imp	1	18156864	G	A	0.056	2.16	3.89364e-05	0.055	0.693	0.701931	0.056	1.66	0.001833	ACTL8/IGSF21
rs4655208	Imp	1	20128536	C	T	0.288	1.52	0.000204566	0.3	1.058	0.981096	0.292	1.35	0.002694	TMCO4/RNF186
rs230177	Geno	1	20683946	A	G	0.265	1.56	2.62438e-05	0.266	1.028	0.836207	0.265	1.37	0.0009949	VWA5B1/CAMK2N1
rs12736884	Imp	1	21725505	C	G	0.064	1.92	0.000343882	0.058	0.968	0.8503	0.062	1.63	0.005176	ECE1/NBPF3
rs3851896	Imp	1	21757334	T	C	0.69	1.51	0.00092955	0.676	1.141	0.328352	0.685	1.37	0.001119	ECE1/NBPF3
rs61772762	Imp	1	24632095	G	T	0.11	0.5	0.000821893	0.109	1.208	0.749366	0.11	0.74	0.01143	IFNLR1/GRHL3
rs35744844	Imp	1	26349245	T	C	0.083	1.83	0.000986015	0.08	1.063	0.736722	0.082	1.58	0.01321	EXTL1
rs139449248	Imp	1	28984576	T	C	0.055	1.83	0.00015753	0.05	1.271	0.794741	0.053	1.68	0.001284	RNU11/GMEB1
rs418806	Imp	1	30405370	A	C	0.632	0.7	0.000345039	0.641	0.927	0.679799	0.635	0.77	0.001653	PTPRU/MATN1
rs11583650	Imp	1	37008945	T	C	0.389	1.39	0.000733415	0.391	1.021	0.882111	0.39	1.26	0.007938	CSF3R/GRIK3
rs12729189	Imp	1	38581890	A	T	0.091	0.5	0.000939238	0.1	1.053	0.878989	0.094	0.71	0.00553	POU3F1/RRAGC
rs7522271	Imp	1	40814528	T	C	0.675	1.39	0.0006148	0.678	1.282	0.227797	0.676	1.35	0.0004927	SMAP2
rs589883	Imp	1	41072099	A	G	0.491	0.69	0.000114532	0.474	0.896	0.252542	0.486	0.75	0.0001449	ZNF684/RIMS3
rs272570	Imp	1	45005996	A	G	0.183	1.5	0.000600039	0.183	1.052	0.712213	0.183	1.36	0.01016	RNF220
rs638749	Geno	1	54450490	G	A	0.595	0.66	3.84219e-05	0.585	0.808	0.0620403	0.591	0.71	9.352e-06	LRRC42/LDLRAD1
rs56106192	Imp	1	55128656	C	G	0.242	1.62	8.32354e-05	0.243	1.175	0.460835	0.242	1.46	0.000289	MROH7-TTC4/MROH7
rs1202794	Geno	1	58372040	A	G	0.23	0.63	0.000751535	0.224	1.187	0.396165	0.228	0.81	0.02507	DAB1
rs10493270	Geno	1	60388674	A	G	0.107	0.54	0.000985466	0.099	0.908	0.755008	0.105	0.67	0.004279	CYP2J2
rs4655595	Geno	1	66558759	G	A	0.092	1.73	0.000447012	0.085	2.065	0.000572113	0.09	1.84	1.166e-06	PDE4B
rs11209757	Geno	1	71728900	G	T	0.458	0.71	0.000352312	0.449	1.065	0.777915	0.455	0.81	0.006214	ZRANB2/NEGR1
rs17626410	Imp	1	76782992	A	G	0.106	1.65	8.03792e-05	0.112	1.109	0.66841	0.108	1.48	0.000558	ST6GALNAC3
rs2392038	Geno	1	76879210	G	A	0.195	1.59	6.96301e-05	0.19	0.897	0.867813	0.193	1.34	0.001737	ST6GALNAC3
rs3931498	Imp	1	82825116	A	G	0.11	1.66	0.000283328	0.1	0.72	0.242167	0.107	1.4	0.02358	LPHN2/TTLL7
rs12404302	Imp	1	83831545	A	G	0.737	1.51	0.000873545	0.736	0.954	0.990826	0.737	1.28	0.007033	LPHN2/TTLL7
rs41313268	Imp	1	86529638	G	T	0.187	0.59	0.000426175	0.183	1.048	0.475694	0.186	0.75	0.01454	COL24A1
rs6675404	Imp	1	91917839	T	C	0.092	0.45	0.000553651	0.091	1.224	0.681164	0.092	0.72	0.01036	HFM1/CDC7
rs66507060	Imp	1	91941500	A	G	0.351	0.63	6.06775e-05	0.358	1.293	0.0877077	0.353	0.83	0.02393	HFM1/CDC7
rs66784996	Imp	1	96271468	G	A	0.227	1.54	0.000193201	0.24	1.122	0.38421	0.231	1.39	0.0004088	RWDD3/PTBP2
rs72688947	Imp	1	105196348	C	T	0.105	1.84	0.000452236	0.102	0.85	0.375897	0.104	1.54	0.01979	AMY1C/PRMT6
rs61789843	Imp	1	106972011	A	G	0.102	1.72	0.000238956	0.104	0.866	0.734212	0.103	1.41	0.005367	AMY1C/PRMT6
rs78096967	Imp	1	110306161	T	C	0.074	1.8	0.000166002	0.059	1.452	0.39983	0.069	1.71	0.0003871	GSTM5/EPS8L3
rs10429940	Imp	1	110773421	C	T	0.059	1.79	0.000281931	0.05	0.698	0.293351	0.056	1.53	0.01958	KCNC4
rs1779445	Imp	1	119508412	C	T	0.82	1.72	0.000764182	0.836	1.587	0.066285	0.825	1.67	0.0001421	TBX15
rs12123821	Imp	1	152179152	T	C	0.058	2.35	0.00014589	0.06	3.499	8.30636e-06	0.058	2.69	1.302e-08	RPTN/HRNR
rs61807002	Imp	1	167860921	C	G	0.31	1.55	2.84432e-05	0.296	0.974	0.965134	0.306	1.35	0.0007453	ADCY10
rs1102315	Imp	1	168429747	G	A	0.688	1.46	0.000316394	0.696	0.992	0.581142	0.691	1.28	0.001171	TBX19/XCL2
rs859625	Imp	1	172730214	A	C	0.407	0.7	0.000115779	0.392	0.972	0.993256	0.402	0.78	0.001722	FASLG/TNFSF18
rs12116893	Imp	1	172966765	G	C	0.35	0.67	0.000168872	0.369	1.068	0.972848	0.356	0.79	0.002116	FASLG/TNFSF18
rs12563124	Imp	1	181703786	A	C	0.139	1.56	0.000838068	0.135	0.668	0.140974	0.138	1.25	0.06407	CACNA1E
rs1887277	Imp	1	183932459	C	A	0.278	1.49	0.000164016	0.272	1.168	0.373645	0.276	1.38	0.0003448	COLGALT2
rs10798003	Imp	1	185247794	A	G	0.44	1.34	0.000992963	0.471	1.32	0.0792544	0.45	1.34	0.0002176	SWT1
rs72734891	Imp	1	190748897	G	A	0.064	1.92	0.000944524	0.067	1.078	0.819026	0.065	1.61	0.004834	BRINP3/RGS18
rs6691362	Geno	1	194572285	T	C	0.113	1.71	0.000151092	0.115	1.24	0.437258	0.114	1.55	0.0004159	B3GALT2/KCNT2
rs6676608	Imp	1	194751055	A	C	0.231	1.61	0.000299531	0.234	0.852	0.488196	0.232	1.34	0.01139	B3GALT2/KCNT2
rs72736427	Imp	1	196941274	T	C	0.065	1.86	0.000766361	0.066	1.132	0.663172	0.065	1.64	0.01324	CFHR4/CFHR5
rs12079841	Imp	1	198269426	A	G	0.081	1.74	0.000289467	0.088	1.206	0.49025	0.083	1.57	0.000822	NEK7
rs60807732	Imp	1	204448062	C	G	0.072	1.7	0.000760856	0.072	1.223	0.160527	0.072	1.55	0.0003816	PIK3C2B
rs7541194	Imp	1	207186399	C	T	0.106	1.64	0.00068641	0.114	0.852	0.519001	0.108	1.37	0.01734	FCAMR/C1orf116
rs7521762	Imp	1	207822581	T	G	0.062	1.86	0.000776982	0.06	0.949	0.793157	0.061	1.57	0.01002	CR1L
rs12029460	Imp	1	217064861	C	A	0.104	1.59	0.000469824	0.114	0.856	0.733984	0.107	1.33	0.008272	ESRRG
rs1383760	Imp	1	218861670	A	C	0.069	1.74	0.000915171	0.08	0.684	0.2451	0.073	1.39	0.04414	C1orf143/LYPLAL1
rs4654038	Imp	1	224179624	T	C	0.57	0.64	6.86836e-05	0.579	0.97	0.921288	0.573	0.74	0.001504	TP53BP2/FBXO28
rs12122004	Geno	1	224335422	C	A	0.054	1.76	0.000629532	0.061	1.004	0.797027	0.056	1.53	0.008665	FBXO28
rs16856322	Geno	1	232176987	T	C	0.272	1.43	0.000510387	0.277	1.122	0.564723	0.274	1.32	0.001591	DISC1
rs72763882	Imp	1	234555115	T	C	0.069	1.88	9.46502e-05	0.065	0.68	0.243696	0.068	1.56	0.01283	TARBP1
rs35590461	Imp	1	239103448	T	G	0.061	1.79	0.000854645	0.078	0.937	0.588671	0.066	1.5	0.0168	ZP4/CHRM3
rs61829258	Imp	1	239973821	A	G	0.05	1.93	0.000655898	0.052	0.496	0.0778763	0.051	1.49	0.08246	CHRM3
rs72762451	Imp	1	241570736	A	T	0.052	1.9	0.000605608	0.059	1.192	0.369291	0.054	1.63	0.0009396	RGS7/FH
rs12077185	Imp	1	242973892	T	C	0.059	1.82	0.000247878	0.059	0.934	0.831193	0.059	1.55	0.00194	PLD5/CEP170
rs10924512	Geno	1	246292470	G	A	0.778	1.83	9.62969e-06	0.779	0.814	0.306834	0.779	1.31	0.002737	SMYD3
rs147264189	Imp	1	246522526	C	A	0.059	1.99	0.000149119	0.056	1.163	0.548855	0.058	1.75	0.0006062	SMYD3
rs72771954	Imp	1	247539505	T	C	0.079	1.89	5.36944e-05	0.076	1.166	0.464003	0.078	1.67	0.0002102	ZNF496/NLRP3
rs4853911	Imp	2	2601765	A	G	0.076	0.35	0.000177608	0.076	0.979	0.79731	0.076	0.59	0.001406	MYT1L/TSSC1
rs72773101	Imp	2	2675429	A	G	0.198	1.48	0.000635628	0.199	0.922	0.701513	0.198	1.28	0.0108	MYT1L/TSSC1
rs116648994	Imp	2	5831892	T	C	0.086	1.79	0.000211682	0.08	0.726	0.240807	0.084	1.47	0.02021	DCDC2C/SOX11
rs2630728	Imp	2	8554053	T	A	0.808	0.63	0.00095831	0.801	1.143	0.450961	0.806	0.75	0.02504	RNF144A/ID2
rs3762539	Imp	2	10089435	C	T	0.248	1.46	0.000203872	0.26	1.065	0.65106	0.252	1.32	0.001041	GRHL1
rs72784939	Imp	2	15930647	A	C	0.068	0.39	0.000940342	0.065	1.454	0.211741	0.067	0.79	0.05046	DDX1/MYCNUN
rs2244953	Imp	2	29981696	C	G	0.905	0.61	0.000636445	0.911	1.045	0.86698	0.907	0.69	0.004097	ALK
rs11674984	Imp	2	32601297	G	A	0.061	1.99	0.000119611	0.065	1.098	0.982965	0.062	1.7	0.001716	BIRC6
rs62150383	Imp	2	33621263	A	G	0.158	0.54	0.00082595	0.163	0.981	0.99371	0.159	0.69	0.006543	LTBP1
rs79631975	Imp	2	34783500	C	T	0.784	0.67	0.00012129	0.759	1.016	0.708154	0.776	0.76	0.003713	FAM98A/CRIM1
rs1527615	Imp	2	34909092	A	G	0.424	1.36	0.000880223	0.429	1.109	0.233087	0.425	1.27	0.0006824	FAM98A/CRIM1
rs17018690	Imp	2	36621057	G	A	0.207	0.54	7.66098e-05	0.191	1.087	0.698541	0.201	0.72	0.002842	CRIM1
rs72783152	Imp	2	36952332	T	C	0.117	1.77	5.68153e-05	0.122	1.923	0.0025805	0.119	1.82	4.96e-07	VIT
rs12999317	Imp	2	38288461	A	G	0.197	1.51	0.00094795	0.204	0.714	0.0652422	0.2	1.23	0.1081	RMDN2
rs62141419	Imp	2	41135713	T	C	0.06	0.33	0.000340846	0.059	1.408	0.110679	0.06	0.75	0.0481	SLC8A1/C2orf91
rs71422146	Imp	2	45367575	A	G	0.06	2.26	3.50971e-05	0.056	1.793	0.0394571	0.059	2.1	5.08e-06	SIX2/SRBD1
rs34556076	Imp	2	45515714	G	A	0.238	1.52	0.000137903	0.25	1.154	0.323627	0.241	1.39	0.0002417	SIX2/SRBD1
rs4953427	Imp	2	47061567	T	C	0.234	1.5	0.000747243	0.227	0.95	0.475302	0.232	1.32	0.02033	SOCS5/MCFD2
rs10188025	Geno	2	49001294	A	C	0.304	1.49	0.000232613	0.32	1.494	0.0687402	0.309	1.49	5.104e-05	STON1-GTF2A1L
rs817070	Imp	2	49583674	C	T	0.107	1.69	0.000159999	0.103	0.577	0.0750616	0.106	1.35	0.04286	FSHR/NRXN1
rs146377404	Imp	2	50623171	C	T	0.051	1.9	0.000670441	0.056	1.091	0.624977	0.053	1.65	0.002314	NRXN1
rs13428952	Imp	2	53450130	G	A	0.734	1.5	0.000525811	0.731	0.783	0.291309	0.733	1.17	0.02791	NRXN1/SCARNA16
rs150827114	Imp	2	55693849	C	T	0.05	0.31	0.000268383	0.05	2.552	0.00101189	0.05	1.18	0.2989	CCDC88A/CCDC104
rs62146354	Imp	2	59232062	A	G	0.103	1.61	0.000941096	0.097	0.96	0.815623	0.101	1.42	0.004784	FANCL/BCL11A
rs35545019	Imp	2	62633228	A	G	0.081	1.65	0.000701473	0.098	1.131	0.993436	0.086	1.47	0.005851	B3GNT2/TMEM17
rs7573532	Imp	2	64360433	A	G	0.505	0.69	0.000522822	0.482	0.856	0.62348	0.497	0.74	0.001918	PELI1
rs7590628	Geno	2	67424193	T	G	0.469	0.73	0.000641826	0.475	1.07	0.873759	0.471	0.83	0.007403	MEIS1/ETAA1
rs72837995	Imp	2	69904213	A	G	0.086	1.82	0.000878906	0.077	1.118	0.971785	0.083	1.62	0.006504	ANXA4
rs11126344	Imp	2	71975453	A	C	0.297	0.65	0.000181515	0.299	0.69	0.0223762	0.297	0.66	1.228e-05	DYSF/CYP26B1
rs10205629	Imp	2	72027252	A	G	0.367	0.7	0.000368206	0.361	0.734	0.0216658	0.365	0.71	2.313e-05	DYSF/CYP26B1
rs12105554	Imp	2	73132193	C	T	0.183	1.49	0.000696519	0.203	1.026	0.851581	0.189	1.33	0.008205	SPR/EMX1
rs72820760	Imp	2	76178754	A	T	0.058	1.91	0.000632427	0.059	1.259	0.643128	0.059	1.7	0.002329	GCFC2/LRRTM4
rs72807157	Imp	2	76560938	C	T	0.096	1.76	5.1985e-05	0.102	0.755	0.459226	0.098	1.41	0.004334	GCFC2/LRRTM4
rs62161649	Imp	2	78045851	C	T	0.128	1.61	0.000605788	0.119	1.262	0.312027	0.125	1.5	0.0007408	LRRTM4/REG3G
rs72816652	Imp	2	79375585	T	C	0.132	1.6	0.000524161	0.136	1.255	0.775262	0.133	1.49	0.002863	REG1A/REG3A
rs17761670	Imp	2	79647450	C	T	0.317	0.68	0.000516284	0.317	1.185	0.238675	0.317	0.84	0.03312	CTNNA2
rs6741368	Geno	2	85603064	A	G	0.223	1.5	0.000409547	0.211	0.927	0.516535	0.22	1.3	0.01277	ELMOD3
rs9677974	Imp	2	86523610	G	A	0.879	0.63	0.000553937	0.883	0.838	0.727914	0.881	0.68	0.002643	REEP1
rs11898060	Imp	2	109806732	C	T	0.822	0.65	0.000622363	0.826	1.421	0.154864	0.823	0.79	0.05153	SH3RF3
rs6715526	Imp	2	109956859	A	G	0.153	1.46	0.000757157	0.147	1.251	0.151092	0.152	1.39	0.0003536	SH3RF3
rs56168774	Imp	2	112131461	A	G	0.224	1.66	7.67463e-05	0.229	1.037	0.661961	0.225	1.45	0.0005294	MIR4435-1HG
rs2056099	Imp	2	112374922	G	T	0.629	1.78	5.52505e-05	0.625	1.2	0.401236	0.628	1.53	0.0001675	MIR4435-1HG/ANAPC1
rs9973741	Imp	2	113853381	G	A	0.387	0.67	0.00067132	0.367	0.803	0.191725	0.381	0.72	0.0004262	IL1F10/IL1RN
rs112903347	Imp	2	115109704	T	G	0.053	0.16	0.000374893	0.047	0.94	0.999961	0.051	0.41	0.00388	ACTR3/DPP10
rs11123482	Imp	2	119036635	T	G	0.43	0.71	0.000671707	0.436	1.189	0.293067	0.432	0.84	0.0318	INSIG2/EN1
rs112713813	Imp	2	154279010	G	C	0.071	0.43	0.000537431	0.075	0.857	0.590567	0.072	0.59	0.001783	ARL6IP6/RPRM
rs13408741	Imp	2	160183202	G	C	0.218	1.52	6.71658e-05	0.213	1.173	0.424091	0.216	1.41	0.0002133	BAZ2B
rs6728947	Imp	2	169059511	C	G	0.398	1.5	0.000357394	0.368	0.839	0.344331	0.389	1.26	0.01899	STK39
rs2724171	Imp	2	169154462	A	C	0.554	0.66	6.0674e-05	0.567	0.798	0.102446	0.558	0.7	2.564e-05	STK39/CERS6
rs73022558	Imp	2	173011973	T	C	0.11	0.52	0.000297294	0.123	1.242	0.752204	0.114	0.78	0.005915	DLX2/ITGA6
rs10930594	Imp	2	174284557	T	C	0.832	0.62	0.000126949	0.82	0.76	0.207186	0.828	0.66	0.0001193	CDCA7/SP3
rs72913554	Imp	2	175175381	A	C	0.086	0.41	0.000881752	0.093	0.94	0.824998	0.088	0.61	0.00467	OLA1/SP9
rs62181982	Imp	2	180886902	C	G	0.193	0.61	0.000446723	0.186	0.823	0.151592	0.19	0.68	0.0002265	CWC22/UBE2E3
rs13025711	Imp	2	182019461	C	T	0.3	1.45	0.000626382	0.3	1.386	0.082859	0.3	1.43	0.0001512	UBE2E3/ITGA4
rs35308779	Imp	2	196188657	C	A	0.133	1.53	0.00093908	0.146	0.715	0.230678	0.137	1.26	0.04707	PCGEM1/SLC39A10
rs7589892	Imp	2	199111918	C	T	0.149	1.53	0.000473384	0.147	1.227	0.533302	0.149	1.43	0.001368	PLCL1
rs78003444	Imp	2	202557374	A	G	0.093	1.73	0.000314628	0.097	0.99	0.769982	0.094	1.48	0.001964	MPP4
rs55758403	Imp	2	202851534	A	G	0.172	1.5	0.000785096	0.172	0.771	0.668016	0.172	1.25	0.0133	CDK15/FZD7
rs12986749	Imp	2	208318286	G	A	0.193	1.48	0.000577795	0.189	1.029	0.671012	0.192	1.34	0.01089	KLF7-IT1/CREB1
rs7596783	Imp	2	209035224	A	G	0.083	1.72	0.000651212	0.089	1.036	0.350142	0.085	1.49	0.0009221	C2orf80
rs55665917	Imp	2	210363882	A	C	0.056	0.34	0.000940122	0.065	0.596	0.126829	0.059	0.44	0.0003478	MAP2
rs6733319	Imp	2	210465558	A	G	0.757	1.62	0.000668965	0.77	1.108	0.637396	0.761	1.41	0.00239	MAP2
rs4672587	Imp	2	211536846	G	A	0.335	0.68	0.000412636	0.352	1.134	0.807106	0.341	0.81	0.006438	CPS1
rs35453359	Imp	2	211659256	T	C	0.263	0.6	1.94172e-05	0.273	1.008	0.767279	0.266	0.74	0.0002722	CPS1/ERBB4
rs34213584	Imp	2	219203078	T	G	0.186	0.6	0.000455014	0.188	1.162	0.424664	0.187	0.79	0.01732	PNKD
rs6723395	Imp	2	228645288	A	G	0.253	1.76	5.60054e-07	0.262	1.259	0.107387	0.256	1.59	5.649e-07	SLC19A3/CCL20
rs812345	Imp	2	229763332	A	G	0.149	1.72	1.21626e-05	0.146	1.416	0.059885	0.148	1.62	3.318e-06	PID1
rs35209184	Imp	2	235700164	G	A	0.16	0.51	0.000202167	0.167	0.987	0.783185	0.162	0.68	0.001485	ARL4C/SH3BP4
rs76065850	Imp	2	236102085	T	C	0.153	1.64	0.000227563	0.166	0.817	0.366712	0.157	1.35	0.01368	SH3BP4/AGAP1
rs115369985	Imp	2	237853713	G	A	0.052	2.9	3.90072e-05	0.046	0.634	0.53069	0.05	2.27	0.002948	ACKR3/COPS8
rs78576990	Imp	2	238476608	C	T	0.094	0.49	0.000890534	0.095	0.846	0.278398	0.094	0.62	0.0008667	PRLH/RAB17
rs79730594	Imp	2	240126667	T	C	0.131	1.6	0.00048328	0.136	1.271	0.286613	0.132	1.49	0.0005497	HDAC4
rs12490396	Imp	3	230456	C	T	0.537	0.63	1.38863e-05	0.519	0.858	0.0595414	0.531	0.7	3.691e-06	CHL1
rs3772274	Imp	3	1421885	A	G	0.439	1.45	0.000382876	0.441	0.763	0.12031	0.439	1.19	0.04814	CNTN6
rs73012571	Imp	3	3780683	T	C	0.072	0.32	0.000321805	0.061	0.761	0.382557	0.068	0.48	0.0006036	SUMF1
rs1351950	Geno	3	4205623	A	G	0.327	0.69	0.000289279	0.319	1.024	0.804745	0.325	0.8	0.005139	SUMF1
rs115106296	Imp	3	6340709	T	A	0.051	1.92	0.000372907	0.048	1.105	0.839831	0.05	1.69	0.005591	EDEM1/GRM7
rs9870018	Imp	3	6927311	A	G	0.249	0.6	0.000340793	0.24	1.161	0.439582	0.246	0.77	0.01402	GRM7
rs2596857	Imp	3	10815474	A	T	0.181	1.48	0.0008783	0.192	1.01	0.928644	0.185	1.32	0.005904	ATP2B2-IT2/SLC6A11
rs73031251	Imp	3	17200435	A	G	0.127	1.67	0.000394912	0.146	0.931	0.856404	0.133	1.41	0.00559	TBC1D5
rs1370120	Imp	3	21277359	T	C	0.165	1.55	0.000355605	0.171	1.09	0.679509	0.167	1.38	0.001688	SGOL1/ZNF385D
rs259484	Imp	3	21943004	C	G	0.241	1.45	0.000271661	0.225	1.223	0.272962	0.236	1.38	0.0003233	ZNF385D
rs7627134	Geno	3	24684637	A	G	0.087	1.67	0.000672552	0.088	0.829	0.926553	0.087	1.38	0.004887	THRB-IT1/RARB
rs3773432	Imp	3	25625053	A	G	0.113	1.67	0.000327656	0.102	0.803	0.512905	0.11	1.41	0.01127	RARB
rs977713	Imp	3	29029209	C	T	0.118	1.64	0.000129522	0.116	1.099	0.670246	0.117	1.45	0.0007916	ZCWPW2/RBMS3
rs62235716	Imp	3	29411779	T	A	0.157	1.65	0.000242989	0.168	1.151	0.788465	0.161	1.47	0.001715	RBMS3
rs9821361	Imp	3	30992726	C	T	0.149	1.5	0.000622508	0.156	1.006	0.928074	0.151	1.33	0.004649	GADL1/STT3B
rs35531732	Imp	3	32299194	G	A	0.108	1.65	0.000616943	0.094	1.514	0.220473	0.103	1.61	0.0004738	CMTM8
rs41314855	Imp	3	38680630	T	C	0.063	1.9	8.36024e-05	0.055	1	0.867191	0.06	1.66	0.001963	SCN5A
rs73060459	Imp	3	38765476	A	C	0.05	1.83	0.00017946	0.05	0.929	0.432491	0.05	1.59	0.009797	SCN10A
rs2276831	Imp	3	42569069	A	C	0.298	0.62	0.000116806	0.307	1.278	0.0717775	0.301	0.83	0.03787	VIPR1
rs55797202	Imp	3	54904027	T	C	0.05	1.99	0.000364512	0.056	0.902	0.307174	0.052	1.64	0.0216	CACNA2D3
rs11130487	Imp	3	55936511	C	A	0.388	0.65	0.00035755	0.391	0.79	0.0840494	0.389	0.69	9.359e-05	ERC2
rs77482257	Imp	3	55959679	T	C	0.093	0.38	0.000564773	0.092	1.17	0.870895	0.093	0.63	0.006847	ERC2
rs145510349	Imp	3	57980359	C	A	0.065	1.96	9.81281e-05	0.071	1.124	0.699414	0.067	1.7	0.0007051	SLMAP/FLNB
rs926141	Geno	3	60095853	T	C	0.533	1.52	0.000200359	0.516	1.222	0.225971	0.527	1.41	0.0001947	FHIT
rs6763419	Imp	3	62217521	C	T	0.064	1.89	2.88586e-05	0.055	1.01	0.962016	0.061	1.63	0.0006193	PTPRG
rs13072200	Imp	3	67699401	T	C	0.271	1.5	0.000234894	0.288	1.014	0.868676	0.277	1.32	0.002053	SUCLG2
rs9837363	Geno	3	68336119	C	T	0.514	1.47	0.000678352	0.529	0.968	0.910699	0.519	1.27	0.007078	FAM19A1
rs2162521	Imp	3	69664325	T	G	0.453	0.69	0.000798132	0.442	1.19	0.457804	0.45	0.83	0.02209	FRMD4B/MITF
rs12492386	Imp	3	74332978	T	A	0.273	0.61	0.000475582	0.24	1.068	0.852279	0.263	0.75	0.006375	CNTN3
rs9819569	Imp	3	74486422	A	T	0.739	1.54	0.000792572	0.743	0.908	0.392847	0.74	1.26	0.02608	CNTN3
rs2341390	Imp	3	80100985	G	T	0.592	0.7	0.000627447	0.582	0.901	0.328518	0.589	0.76	0.0008184	ROBO1/GBE1
rs78022775	Imp	3	81812125	C	T	0.122	0.53	0.000721138	0.114	0.802	0.259386	0.12	0.62	0.000665	GBE1
rs11712238	Imp	3	82775843	T	G	0.119	1.57	0.000987209	0.119	1.555	0.0638925	0.119	1.56	0.0001725	GBE1/CADM2
rs1497532	Imp	3	98061427	A	C	0.113	1.53	0.000719913	0.114	0.613	0.160034	0.113	1.25	0.05423	OR5H2/OR5K4
rs2053627	Geno	3	105304484	C	T	0.206	1.51	0.000397853	0.201	1.163	0.459279	0.205	1.39	0.0009426	ALCAM/CBLB
rs34351317	Imp	3	105519927	C	T	0.066	1.76	0.000711656	0.067	0.495	0.265796	0.066	1.39	0.03589	CBLB
rs4991950	Imp	3	106918396	C	T	0.356	0.68	0.000952252	0.355	0.779	0.198779	0.356	0.71	0.0005974	CBLB/CCDC54
rs72622303	Imp	3	108017409	T	C	0.054	1.82	6.00578e-05	0.049	0.557	0.153523	0.053	1.52	0.01535	HHLA2
rs73195642	Imp	3	122720149	G	C	0.092	1.57	0.000737783	0.08	0.877	0.787574	0.088	1.36	0.009806	SEMA5B
rs2630210	Imp	3	127420854	T	C	0.284	1.36	0.000973217	0.288	1.044	0.586654	0.285	1.25	0.002745	MGLL
rs76074386	Imp	3	129677841	A	G	0.106	1.66	0.000229499	0.111	1.101	0.843885	0.107	1.49	0.00403	TMCC1/TRH
rs7648359	Geno	3	134523608	T	C	0.075	1.7	0.000165469	0.076	1.116	0.385291	0.075	1.5	0.0003642	EPHB1
rs6803258	Imp	3	141007221	G	A	0.792	0.66	0.000130271	0.788	1.151	0.819068	0.79	0.77	0.002955	ACPL2
rs7642415	Imp	3	143162008	G	T	0.801	1.68	0.000529727	0.793	1.103	0.394868	0.798	1.41	0.0009332	SLC9A9
rs36086202	Imp	3	143499959	A	G	0.402	1.47	0.000118799	0.402	1.226	0.259061	0.402	1.39	0.0001547	SLC9A9
rs7614629	Imp	3	145506173	A	G	0.558	0.65	2.19215e-05	0.56	0.872	0.630152	0.559	0.71	0.000194	C3orf58/PLOD2
rs78461359	Imp	3	145509008	G	A	0.062	1.92	0.000368438	0.063	1.062	0.768053	0.062	1.64	0.002187	C3orf58/PLOD2
rs6797672	Imp	3	149245209	C	T	0.783	1.54	0.00033681	0.775	0.773	0.0603527	0.781	1.15	0.06972	WWTR1
rs76137241	Imp	3	151352587	C	T	0.077	1.79	0.000584952	0.076	0.824	0.65254	0.077	1.48	0.01146	IGSF10/AADACL2
rs1093953	Imp	3	155721181	G	C	0.857	1.87	0.000203446	0.842	1.044	0.935993	0.852	1.45	0.002195	GMPS/KCNAB1
rs56139929	Imp	3	159823791	T	C	0.112	1.8	5.04287e-05	0.122	1.116	0.837208	0.115	1.58	0.0006479	IL12A/C3orf80
rs2568858	Imp	3	168242895	A	C	0.359	0.69	0.000592787	0.341	0.936	0.872256	0.353	0.77	0.003947	GOLIM4/MECOM
rs10936921	Geno	3	176672414	G	A	0.057	1.81	8.48177e-05	0.053	0.526	0.182852	0.055	1.48	0.01583	NAALADL2/TBL1XR1
rs2611621	Geno	3	187629577	A	G	0.933	0.57	0.000489931	0.935	0.905	0.484177	0.934	0.64	0.001201	BCL6/LPP
rs10513840	Geno	3	189417208	C	A	0.217	0.62	0.000751676	0.225	0.732	0.122593	0.22	0.66	0.0002755	TP63
rs3774028	Imp	3	190028272	T	A	0.315	1.55	0.000259023	0.322	0.775	0.161833	0.317	1.26	0.03165	CLDN1
rs35322657	Imp	3	192250311	G	A	0.087	0.43	0.000892787	0.083	0.713	0.38256	0.086	0.52	0.001342	FGF12
rs4355457	Imp	4	1520829	G	A	0.675	0.69	0.000693709	0.688	0.94	0.728886	0.68	0.76	0.003116	NKX1-1/FAM53A
rs231401	Imp	4	2822162	A	G	0.092	1.85	6.80263e-05	0.088	0.858	0.650067	0.091	1.53	0.002992	SH3BP2
rs7659958	Geno	4	6607830	C	T	0.179	1.5	0.000318956	0.182	0.965	0.789617	0.18	1.32	0.005671	MAN2B2
rs59586032	Imp	4	8122201	A	G	0.093	1.72	0.000329491	0.087	0.845	0.560328	0.091	1.45	0.01002	ABLIM2
rs114577583	Imp	4	17786485	C	A	0.055	2.07	0.000273347	0.056	1.261	0.207918	0.056	1.79	0.0002245	FAM184B/DCAF16
rs358577	Imp	4	21453740	A	G	0.24	1.46	0.000718043	0.248	1.06	0.447827	0.243	1.33	0.001427	KCNIP4
rs11721816	Imp	4	25730572	T	C	0.45	1.46	0.000603494	0.447	1.021	0.788241	0.449	1.3	0.003268	SLC34A2/SEL1L3
rs2137235	Imp	4	26080618	G	A	0.178	0.6	0.000768162	0.182	1.01	0.816147	0.179	0.74	0.009455	SMIM20/RBPJ
rs13121381	Imp	4	29441014	G	T	0.177	0.57	0.000678865	0.166	1.028	0.789472	0.174	0.72	0.009253	STIM2/PCDH7
rs11722750	Geno	4	29612612	G	T	0.394	0.71	0.000538506	0.389	1.008	0.841618	0.393	0.8	0.003431	STIM2/PCDH7
rs112711928	Imp	4	35107709	C	G	0.063	2.18	1.40751e-05	0.07	1.123	0.651243	0.065	1.8	0.000151	ARAP2
rs4546251	Imp	4	37534798	C	G	0.125	1.73	0.000172072	0.137	1.111	0.459955	0.129	1.51	0.000499	C4orf19
rs17616434	Geno	4	38812876	C	T	0.226	0.62	0.000131431	0.214	0.952	0.738512	0.222	0.73	0.003623	TLR1
rs76418796	Imp	4	40018716	G	A	0.05	1.87	0.00024078	0.06	1.453	0.123443	0.053	1.71	0.0001043	PDS5A/N4BP2
rs278972	Imp	4	40395256	T	C	0.127	1.58	0.000618187	0.131	1.284	0.419388	0.128	1.48	0.001151	CHRNA9/RBM47
rs13139804	Imp	4	47544481	G	A	0.441	0.66	0.000574315	0.449	0.758	0.0738072	0.443	0.69	0.0001234	ATP10D
rs55781011	Imp	4	48076091	A	G	0.082	1.77	9.96248e-05	0.083	1.098	0.722522	0.082	1.55	0.0007613	TXK
rs7694313	Imp	4	56637663	A	G	0.728	1.49	0.000588323	0.718	0.977	0.894827	0.725	1.27	0.006669	NMU/EXOC1
rs11945709	Imp	4	56858450	G	A	0.258	1.44	0.000933143	0.263	0.978	0.925028	0.259	1.29	0.008487	CEP135
rs10011825	Imp	4	61745058	A	G	0.541	0.68	3.94126e-05	0.53	1.114	0.518053	0.537	0.79	0.003078	LPHN3
rs72641560	Imp	4	64369909	C	A	0.094	1.87	0.000304749	0.098	1.414	0.191899	0.095	1.71	0.0002211	LPHN3/TECRL
rs62409106	Imp	4	64985292	A	G	0.059	1.99	0.000738308	0.054	2.178	0.00863684	0.057	2.05	1.926e-05	LPHN3/TECRL
rs28660252	Imp	4	77867667	C	T	0.407	0.67	0.000559013	0.397	1.067	0.48414	0.404	0.79	0.01672	SOWAHB/40787
rs56373850	Imp	4	81152002	T	A	0.052	1.81	0.000972441	0.062	1.347	0.193708	0.055	1.66	0.0005891	PRDM8/FGF5
rs35443822	Imp	4	83311591	A	G	0.163	0.57	0.00075689	0.16	0.983	0.545298	0.162	0.71	0.002019	HNRNPD/HNRNPDL
rs4364254	Imp	4	84223713	T	C	0.717	0.62	0.000181072	0.713	0.684	0.0660226	0.715	0.64	3.908e-05	HPSE
rs1795736	Imp	4	89932273	A	G	0.414	0.72	0.000358806	0.4	1.113	0.277754	0.409	0.83	0.02362	FAM13A
rs79013678	Imp	4	90077986	T	C	0.088	1.79	0.000459405	0.095	0.861	0.518734	0.09	1.46	0.01362	TIGD2/GPRIN3
rs28401274	Imp	4	98307101	G	C	0.08	0.41	0.000940085	0.081	1.334	0.162763	0.08	0.77	0.06145	STPG2
rs17031191	Geno	4	102261268	T	C	0.069	1.83	0.000189228	0.072	0.785	0.45485	0.07	1.52	0.009486	PPP3CA
rs72900303	Imp	4	109113323	C	A	0.091	1.61	0.000412998	0.089	1.265	0.502129	0.09	1.51	0.001118	LEF1/RPL34
rs11937803	Imp	4	111789179	G	A	0.16	0.51	0.000192793	0.152	0.823	0.536907	0.157	0.62	0.0007061	PITX2/C4orf32
rs35918738	Imp	4	112877195	C	T	0.263	0.64	0.000434503	0.247	1.178	0.472372	0.258	0.8	0.01483	PITX2/C4orf32
rs11098314	Geno	4	116529968	C	T	0.207	0.64	0.000747579	0.214	1.067	0.707079	0.21	0.78	0.01182	NDST4/TRAM1L1
rs62326349	Imp	4	120116225	T	C	0.275	1.37	0.000646764	0.274	1.114	0.400871	0.275	1.29	0.001115	MYOZ2/USP53
rs12331776	Imp	4	120617412	A	C	0.321	0.67	0.000249533	0.315	0.868	0.364899	0.319	0.73	0.0004609	PDE5A/MAD2L1
rs13131446	Imp	4	124428943	C	G	0.119	1.62	0.000809206	0.122	1.205	0.060018	0.12	1.47	0.0001349	SPRY1/ANKRD50
rs6827806	Imp	4	126592250	T	C	0.056	2.02	0.000184991	0.05	0.72	0.199038	0.054	1.71	0.02231	FAT4/INTU
rs4566661	Imp	4	126722617	T	C	0.606	1.55	9.94119e-05	0.606	1.101	0.628616	0.606	1.38	0.0005775	FAT4/INTU
rs114686462	Imp	4	134314631	G	A	0.059	1.75	0.000819142	0.058	1.706	0.0745489	0.059	1.73	0.0001714	PCDH10/PABPC4L
rs76063194	Imp	4	134927861	T	G	0.1	1.62	0.00098929	0.098	0.957	0.749397	0.099	1.42	0.01288	PCDH10/PABPC4L
rs116468624	Imp	4	148444934	A	G	0.078	1.72	0.000479118	0.081	0.928	0.734045	0.079	1.46	0.008375	EDNRA
rs35953946	Imp	4	153888406	T	C	0.152	1.69	0.000179517	0.172	1.003	0.584553	0.159	1.44	0.00649	FHDC1
rs72721306	Imp	4	155039628	C	T	0.215	1.43	0.000622882	0.224	0.882	0.760951	0.218	1.24	0.009325	SFRP2/DCHS2
rs17033289	Imp	4	156555473	G	A	0.152	0.57	0.000887957	0.15	1.404	0.0241286	0.151	0.83	0.1671	MAP9/GUCY1A3
rs11100229	Geno	4	160361747	T	C	0.389	1.43	0.000442194	0.385	0.929	0.824572	0.388	1.25	0.006472	RAPGEF2/FSTL5
rs111433788	Imp	4	170993994	G	C	0.092	1.56	0.000653848	0.095	0.975	0.745089	0.093	1.38	0.009967	AADAT
rs10007434	Imp	4	171722641	G	T	0.105	1.61	0.000776784	0.097	0.701	0.323736	0.103	1.33	0.03138	AADAT/GALNTL6
rs7664743	Imp	4	177298150	G	T	0.787	0.61	0.00023626	0.781	1.162	0.27446	0.785	0.74	0.01894	SPCS3/VEGFC
rs4637448	Imp	4	182065232	T	G	0.917	0.61	0.000726376	0.912	1.752	0.195568	0.915	0.75	0.04685	TENM3
rs7671967	Imp	4	184767772	C	G	0.641	1.48	0.000337999	0.629	1.02	0.609746	0.637	1.3	0.001338	TRAPPC11/STOX2
rs4862632	Imp	4	186986617	G	A	0.248	1.48	0.000718869	0.251	0.956	0.87124	0.249	1.3	0.008023	SORBS2/TLR3
rs56086940	Imp	4	188089317	G	A	0.129	0.54	0.000665801	0.126	1.288	0.177508	0.128	0.78	0.04822	FAT1/ZFP42
rs28661963	Imp	4	189123488	G	C	0.168	1.52	0.000679181	0.166	0.946	0.920165	0.167	1.33	0.004849	TRIML1/FRG1
rs73037977	Imp	4	190079106	A	G	0.132	1.6	0.000878994	0.128	0.958	0.867014	0.131	1.37	0.009247	TRIML1/FRG1
rs35220556	Imp	5	1119613	C	G	0.515	1.37	0.000714789	0.541	0.849	0.147015	0.523	1.16	0.0574	SLC12A7/SLC6A19
rs2736107	Imp	5	1297854	T	C	0.274	0.67	0.00033367	0.269	1.111	0.535046	0.272	0.81	0.01076	TERT/CLPTM1L
rs35480035	Imp	5	2404696	G	C	0.057	1.84	0.000974745	0.052	1.075	0.499005	0.055	1.59	0.002127	IRX4/IRX2
rs12189278	Imp	5	2510576	T	C	0.069	1.87	0.000842461	0.064	0.686	0.114214	0.067	1.51	0.0738	IRX4/IRX2
rs11748824	Geno	5	3997830	C	T	0.112	0.52	0.000768284	0.112	0.61	0.0397848	0.112	0.55	8.444e-05	IRX1/ADAMTS16
rs11743743	Imp	5	6598553	A	C	0.499	0.7	0.000310165	0.5	0.746	0.0508424	0.499	0.71	4.738e-05	UBE2QL1/NSUN2
rs17354543	Imp	5	9908947	C	T	0.064	1.64	0.000312478	0.072	0.994	0.830142	0.066	1.42	0.002276	TAS2R1/FAM173B
rs16901689	Geno	5	11507368	T	G	0.152	0.58	0.00096519	0.145	0.924	0.744375	0.149	0.71	0.004108	CTNND2
rs76952064	Imp	5	14176029	C	T	0.055	1.96	2.70123e-05	0.058	1.108	0.912586	0.056	1.72	0.000828	TRIO
rs58950472	Imp	5	14944031	T	C	0.247	1.44	0.000567323	0.226	1.001	0.752416	0.24	1.3	0.008952	ANKH/FBXL7
rs10805781	Imp	5	25590931	A	T	0.248	1.45	0.000919539	0.24	0.872	0.637155	0.245	1.24	0.01574	CDH10/CDH9
rs13167720	Geno	5	26862104	C	T	0.332	1.54	2.51689e-05	0.324	0.822	0.21431	0.33	1.28	0.007034	CDH10/CDH9
rs74583860	Imp	5	33210675	G	T	0.073	1.91	0.000214761	0.074	1.14	0.773081	0.073	1.65	0.00151	NPR3/TARS
rs10037789	Imp	5	36068621	T	A	0.849	0.63	6.98515e-05	0.853	1.582	0.0327751	0.851	0.77	0.0475	UGT3A2
rs650118	Imp	5	39293111	C	T	0.092	1.79	0.000589562	0.097	1.154	0.516863	0.094	1.56	0.001534	C9
rs181141	Imp	5	40209676	T	C	0.054	1.77	0.000717255	0.059	1.127	0.584069	0.055	1.56	0.00217	DAB2/PTGER4
rs10940598	Imp	5	50236839	T	C	0.073	1.9	7.08048e-05	0.081	1.309	0.178708	0.075	1.68	6.046e-05	PARP8/ISL1
rs13185633	Geno	5	52024627	A	G	0.214	0.65	0.000968004	0.195	0.667	0.0797862	0.208	0.66	0.0002142	ISL1/ITGA1
rs2112940	Imp	5	54291538	T	G	0.132	0.5	0.000559737	0.126	1.099	0.565885	0.13	0.71	0.01367	ESM1
rs76500476	Imp	5	59191522	A	C	0.052	1.96	0.000223258	0.067	0.873	0.694116	0.057	1.55	0.005661	PDE4D
rs143167382	Imp	5	65204186	A	G	0.065	1.83	0.000169959	0.08	0.978	0.655077	0.07	1.55	0.005247	NLN/ERBB2IP
rs7728800	Imp	5	66224020	C	T	0.05	1.89	0.000737285	0.057	1.333	0.267557	0.052	1.69	0.0007053	MAST4
rs7718585	Imp	5	66820773	T	C	0.248	1.49	0.000196611	0.252	1.356	0.072161	0.249	1.44	4.65e-05	CD180/PIK3R1
rs281122	Imp	5	70986594	A	T	0.17	0.52	0.000134654	0.172	1.015	0.574187	0.171	0.7	0.005585	MCCC2/CARTPT
rs2721751	Imp	5	71226687	A	G	0.195	0.6	0.000378878	0.207	1.159	0.399195	0.198	0.79	0.0167	CARTPT/MAP1B
rs1665892	Imp	5	73966687	T	C	0.242	0.56	0.000278266	0.233	0.78	0.279521	0.239	0.63	0.0003408	HEXB
rs10070420	Geno	5	76419094	A	G	0.082	1.81	0.000172913	0.087	0.765	0.53477	0.084	1.49	0.007224	ZBED3/PDE8B
rs62377920	Imp	5	78308506	C	T	0.054	2.15	2.8689e-05	0.065	1.207	0.912173	0.058	1.83	0.0008626	DMGDH
rs7709966	Imp	5	80484987	T	C	0.119	1.65	0.000163799	0.124	1.547	0.0303741	0.121	1.61	1.531e-05	RASGRF2
rs56938600	Imp	5	80612484	G	A	0.106	1.82	2.59319e-05	0.107	1.524	0.0991726	0.106	1.72	1.199e-05	ZCCHC9/ACOT12
rs7445369	Geno	5	88752744	T	C	0.616	1.54	8.15688e-05	0.626	0.869	0.33702	0.62	1.25	0.008348	MEF2C/CETN3
rs17082260	Imp	5	97312439	G	A	0.098	1.75	4.65569e-05	0.1	0.946	0.662621	0.098	1.5	0.00228	RIOK2/RGMB
rs79240950	Imp	5	113799578	C	A	0.159	0.59	0.000721928	0.156	0.969	0.43777	0.158	0.71	0.001384	KCNN2
rs1592875	Imp	5	115077119	C	G	0.631	1.51	0.000767305	0.648	0.965	0.639691	0.636	1.28	0.01398	TMED7/CDO1
rs56368075	Imp	5	116478640	T	C	0.067	2.32	2.00873e-05	0.064	1.099	0.91971	0.066	1.91	0.0006675	SEMA6A/DTWD2
rs2560606	Geno	5	116723208	T	C	0.511	1.43	0.000609649	0.517	1.079	0.580424	0.513	1.3	0.001902	SEMA6A/DTWD2
rs767935	Imp	5	118243043	T	G	0.1	1.67	0.000722115	0.104	0.817	0.237812	0.101	1.41	0.03984	DTWD2
rs255577	Imp	5	129727341	C	T	0.098	0.39	0.000292609	0.097	0.721	0.522963	0.098	0.51	0.0009225	CHSY3/HINT1
rs848	Geno	5	131996500	C	A	0.759	0.63	9.4674e-06	0.75	0.724	0.0158833	0.756	0.66	5.625e-07	IL13
rs2243270	Geno	5	132014109	G	A	0.166	1.87	4.09089e-08	0.19	1.204	0.0838165	0.174	1.63	4.659e-08	IL4
rs62364707	Imp	5	135131369	T	G	0.061	1.84	0.000437641	0.052	1.068	0.733162	0.058	1.63	0.00792	CXCL14/SLC25A48
rs78950299	Imp	5	141538333	T	C	0.092	1.92	0.000237633	0.086	1.958	0.0122467	0.09	1.93	8.737e-06	NDFIP1/SPRY4
rs6894617	Imp	5	149541421	T	C	0.242	1.47	0.000538693	0.238	1.059	0.988578	0.24	1.34	0.004835	PDGFRB/CDX1
rs449630	Imp	5	150560315	C	G	0.322	1.45	0.000319318	0.331	1.184	0.225089	0.325	1.35	0.0002833	ANXA6/CCDC69
rs1186932	Imp	5	157288984	T	G	0.824	0.66	0.000407895	0.824	1.231	0.699007	0.824	0.79	0.008196	CLINT1/EBF1
rs17626412	Imp	5	158338972	A	G	0.053	2.25	0.000199349	0.056	0.939	0.664665	0.054	1.8	0.001065	EBF1
rs13166455	Imp	5	161087890	A	G	0.353	1.38	0.00081515	0.372	0.882	0.714754	0.359	1.2	0.01227	GABRA6
rs76295149	Imp	5	162219511	T	C	0.066	1.87	0.000695873	0.076	1.314	0.361058	0.069	1.69	0.001015	GABRG2/CCNG1
rs703508	Imp	5	169816300	G	A	0.893	0.59	0.000838866	0.905	0.953	0.325403	0.897	0.67	0.001018	KCNIP1/KCNMB1
rs11959093	Imp	5	173626120	T	C	0.063	2.19	0.00083321	0.064	1.25	0.87846	0.063	1.89	0.005079	NSG2
rs7705178	Imp	5	175008672	A	G	0.329	0.66	0.00035083	0.326	1.137	0.765218	0.328	0.8	0.006383	SFXN1/HRH2
rs2672830	Imp	5	177946826	G	A	0.849	0.62	0.000308555	0.864	0.741	0.266525	0.854	0.66	0.0003465	COL23A1
rs114542006	Imp	5	178275112	C	T	0.11	1.59	0.0009707	0.125	0.765	0.16792	0.115	1.33	0.06109	ZNF354A/ZNF354B
rs9501984	Geno	6	3300964	G	A	0.497	0.71	0.000956059	0.52	0.839	0.383728	0.504	0.75	0.001422	PSMG4/SLC22A23
rs9503890	Imp	6	4013264	T	C	0.154	1.4	0.000935779	0.164	1.184	0.315431	0.157	1.32	0.001066	FAM50B/PRPF4B
rs73718409	Imp	6	5879723	T	C	0.076	1.83	0.000176792	0.07	1.188	0.891682	0.074	1.64	0.001785	FARS2/NRN1
rs1340658	Imp	6	8386311	G	A	0.903	0.62	0.000448019	0.899	1.243	0.650208	0.901	0.74	0.009747	EEF1E1/SLC35B3
rs595526	Imp	6	10467101	G	A	0.408	1.4	0.000229087	0.439	1.025	0.843107	0.418	1.26	0.004033	TFAP2A/GCNT2
rs9368736	Imp	6	11484475	C	T	0.058	1.96	0.000723273	0.059	1.443	0.344697	0.058	1.8	0.0009802	NEDD9/TMEM170B
rs11754994	Imp	6	16456512	C	T	0.376	1.46	0.000392805	0.376	0.807	0.153478	0.376	1.21	0.04093	ATXN1
rs500720	Geno	6	18426608	G	A	0.617	0.71	0.000166048	0.618	1.077	0.550432	0.617	0.81	0.006761	RNF144B
rs77158610	Imp	6	19668596	T	A	0.05	2.24	4.7982e-05	0.055	0.762	0.2788	0.051	1.76	0.007636	RNF144B/ID4
rs80198746	Imp	6	22260022	A	C	0.101	1.64	0.00055074	0.106	1.242	0.235253	0.102	1.51	0.0004693	CASC14/PRL
rs9358856	Geno	6	25426768	A	G	0.137	1.69	0.000687968	0.13	1.15	0.754876	0.135	1.51	0.003305	LRRC16A
rs9273440	Imp	6	32627561	C	T	0.706	0.66	6.62333e-07	0.707	0.449	3.8474e-06	0.706	0.58	1.653e-11	HLA-DQB1
rs28746833	Imp	6	32633819	A	G	0.333	0.58	1.06021e-06	0.338	0.617	0.0428267	0.335	0.59	2.684e-07	HLA-DQB1
rs1698988	Imp	6	38687185	C	A	0.287	1.58	0.000544016	0.283	1.165	0.340295	0.286	1.44	0.0007679	DNAH8
rs76768686	Imp	6	42122147	T	C	0.177	0.58	0.000283841	0.172	1.203	0.174621	0.175	0.78	0.03125	C6orf132/GUCA1A
rs2746443	Imp	6	54749032	A	G	0.541	1.42	0.000671136	0.55	0.801	0.153367	0.543	1.17	0.05394	FAM83B
rs16897203	Imp	6	66516192	T	C	0.179	0.58	0.000230367	0.17	1.04	0.87881	0.176	0.73	0.002077	EYS/BAI3
rs2245704	Geno	6	66519756	C	A	0.774	0.63	3.38802e-05	0.767	1.038	0.869142	0.772	0.74	0.0005368	EYS/BAI3
rs13219669	Imp	6	69642099	T	C	0.083	1.75	0.000245215	0.08	0.881	0.821463	0.082	1.45	0.001878	BAI3
rs13196418	Imp	6	70251478	A	C	0.205	1.61	8.75797e-05	0.209	1.045	0.47455	0.206	1.4	0.0003158	BAI3/LMBRD1
rs111543654	Imp	6	72190567	G	C	0.065	1.86	0.000911059	0.064	1.024	0.672669	0.065	1.58	0.003291	OGFRL1/RIMS1
rs72900337	Imp	6	77356232	T	G	0.109	1.71	0.000830009	0.109	1.283	0.270286	0.109	1.58	0.0007872	U6/HTR1B
rs9343875	Imp	6	79844394	T	C	0.281	0.65	0.000720423	0.283	0.726	0.0372674	0.282	0.67	7.448e-05	PHIP/HMGN3
rs11962044	Imp	6	80074397	C	G	0.466	1.42	0.00043429	0.456	0.908	0.817675	0.463	1.23	0.006497	HMGN3/LCA5
rs9450452	Imp	6	87142967	C	T	0.346	1.43	0.000429711	0.345	1.202	0.385938	0.346	1.35	0.0007662	SYNCRIP/HTR1E
rs4438967	Imp	6	100284984	A	T	0.763	1.54	0.000687434	0.781	1.312	0.306154	0.769	1.46	0.0007987	PRDM13/MCHR2
rs67265223	Imp	6	105659691	T	C	0.054	1.87	0.000869924	0.064	1.235	0.274502	0.057	1.64	0.0008347	POPDC3/PREP
rs319082	Imp	6	107767514	G	A	0.837	0.61	0.000151399	0.84	0.736	0.0609179	0.838	0.65	3.045e-05	PDSS2
rs4645455	Imp	6	107896940	G	T	0.252	1.59	0.000447976	0.245	1.056	0.344535	0.25	1.4	0.0006703	SOBP
rs11153481	Imp	6	114779143	T	C	0.684	1.61	0.000168233	0.699	1.013	0.911058	0.689	1.36	0.002797	HS3ST5/FRK
rs684578	Imp	6	117083492	C	G	0.419	0.69	0.000188408	0.405	1.019	0.801848	0.415	0.79	0.003917	FAM162B
rs9481790	Imp	6	118734654	G	A	0.749	0.66	0.000984254	0.754	1.104	0.669555	0.751	0.77	0.01528	SLC35F1/CEP85L
rs9320737	Geno	6	120523112	T	C	0.411	0.7	0.000472993	0.415	1.258	0.209053	0.413	0.87	0.03536	MAN1A1/TBC1D32
rs6900956	Imp	6	130440798	A	G	0.488	0.63	7.91855e-05	0.495	1.138	0.554572	0.49	0.77	0.00425	L3MBTL3
rs293339	Imp	6	130723484	A	G	0.081	0.38	0.00029843	0.082	1.237	0.370514	0.082	0.69	0.01582	TMEM200A
rs3010296	Imp	6	139797695	T	C	0.859	0.61	0.000173635	0.861	1.24	0.348655	0.859	0.72	0.01239	CITED2/NMBR
rs4896462	Imp	6	139810886	C	G	0.274	0.68	0.000341192	0.27	1.423	0.0039171	0.273	0.91	0.2212	CITED2/NMBR
rs1572902	Imp	6	146979589	G	A	0.779	0.66	0.000391058	0.779	0.98	0.603671	0.779	0.74	0.001464	ADGB
rs4897128	Imp	6	149813362	A	C	0.176	1.46	0.000115604	0.167	1.154	0.253776	0.173	1.36	0.000147	ZC3H12D/PPIL4
rs6909158	Imp	6	150300964	C	T	0.213	1.42	0.000281384	0.203	0.906	0.763357	0.209	1.25	0.005562	ULBP1/RAET1L
rs11961573	Geno	6	151583994	C	T	0.091	0.43	0.000365945	0.091	0.766	0.225477	0.091	0.56	0.0003174	AKAP12
rs11964047	Imp	6	154048345	T	G	0.293	1.47	0.000839733	0.279	1.094	0.465027	0.288	1.34	0.001704	RGS17/OPRM1
rs72995106	Imp	6	155161311	G	A	0.05	1.97	0.000490331	0.047	0.874	0.555622	0.049	1.65	0.01293	TIAM2
rs4709214	Imp	6	158986471	A	G	0.307	1.4	0.000852848	0.314	0.792	0.176757	0.309	1.17	0.05503	TMEM181
rs9365505	Geno	6	163312845	A	G	0.51	1.42	0.000736149	0.511	1.245	0.277664	0.51	1.36	0.0007399	PACRG
rs78466618	Imp	6	165215943	A	G	0.07	1.82	0.00099928	0.069	1.511	0.0916687	0.069	1.72	0.0002559	QKI/C6orf118
rs2049957	Imp	6	166851320	A	G	0.549	1.59	0.000831678	0.535	1.213	0.585628	0.544	1.41	0.002434	RPS6KA2
rs9364403	Imp	6	168535515	C	T	0.839	0.66	0.000598139	0.84	1.374	0.154958	0.839	0.79	0.05047	FRMD1/DACT2
rs57982666	Imp	7	185861	T	C	0.309	0.62	6.70639e-05	0.314	1.545	0.0154504	0.311	0.88	0.06843	FAM20C
rs73040753	Imp	7	187336	A	G	0.079	1.71	0.000299659	0.084	0.605	0.0918981	0.081	1.37	0.05106	FAM20C
rs11977885	Geno	7	4686519	G	A	0.212	0.55	0.000174804	0.227	0.89	0.466584	0.216	0.67	0.0005171	FOXK1
rs35238482	Imp	7	6866983	A	G	0.185	1.62	0.000374112	0.188	0.979	0.595263	0.186	1.39	0.001382	CCZ1B/C1GALT1
rs4141174	Imp	7	8534063	C	A	0.114	1.65	0.000321793	0.106	0.796	0.220703	0.111	1.38	0.02745	NXPH1
rs4475383	Imp	7	13528524	C	T	0.317	1.56	0.000359114	0.33	0.984	0.497116	0.321	1.35	0.01241	ARL4A/ETV1
rs17457359	Imp	7	16023546	C	T	0.119	0.49	0.000854033	0.113	0.874	0.554748	0.117	0.62	0.002273	MEOX2/ISPD
rs1349140	Imp	7	17562859	C	T	0.745	1.55	0.000612202	0.74	1.088	0.524005	0.743	1.37	0.001614	AHR/SNX13
rs6963949	Geno	7	21064647	C	T	0.669	0.69	0.000359133	0.661	1.109	0.464966	0.666	0.8	0.0135	SP8/SP4
rs17149415	Geno	7	24442486	G	A	0.218	1.49	7.48976e-05	0.206	0.936	0.495496	0.214	1.31	0.004849	NPY/MPP6
rs134	Imp	7	24951382	A	G	0.271	1.5	0.000340464	0.277	1.113	0.385144	0.273	1.36	0.0006371	OSBPL3
rs62451098	Imp	7	28427329	T	A	0.092	1.62	0.000955684	0.085	1.25	0.654899	0.09	1.51	0.003255	CREB5
rs61320714	Imp	7	36538303	C	G	0.26	0.63	0.000482982	0.259	1	0.991513	0.26	0.74	0.004699	ANLN/AOAH
rs7796368	Imp	7	44936069	A	G	0.401	0.68	0.000625087	0.41	0.925	0.386319	0.404	0.76	0.001028	PURB/MYO1G
rs7779885	Imp	7	45892846	C	T	0.146	1.58	0.000356625	0.137	0.803	0.462378	0.143	1.34	0.01354	ADCY1/IGFBP1
rs816394	Imp	7	56254414	G	C	0.822	0.65	6.84972e-05	0.825	1.323	0.216455	0.823	0.78	0.01206	NUPR1L/ZNF479
rs2634081	Imp	7	56679152	G	C	0.626	0.7	0.000766994	0.623	1.249	0.117165	0.625	0.84	0.06931	NUPR1L/ZNF479
rs2867810	Imp	7	67793978	T	C	0.301	1.44	0.000143982	0.294	1.105	0.466796	0.299	1.32	0.0004468	TYW1/AUTS2
rs10272925	Imp	7	70621666	T	C	0.111	1.56	0.000997216	0.116	1.546	0.0416955	0.113	1.55	0.0001129	WBSCR17
rs60763510	Imp	7	70631763	A	G	0.072	1.84	8.10524e-05	0.074	1.217	0.38427	0.073	1.64	0.0002092	WBSCR17
rs9638325	Imp	7	73826750	C	G	0.657	1.48	0.000922904	0.648	1.001	0.705329	0.654	1.29	0.01356	CLIP2/GTF2IRD1
rs73138006	Imp	7	75769990	C	T	0.177	1.6	0.000635255	0.179	0.839	0.31389	0.177	1.33	0.02888	MDH2/SRRM3
rs12533978	Imp	7	75943352	C	T	0.264	1.5	0.00094246	0.271	0.997	0.917219	0.266	1.32	0.006043	HSPB1/YWHAG
rs11766914	Imp	7	78018443	T	C	0.063	1.92	0.000615184	0.078	0.941	0.511641	0.067	1.57	0.01653	MAGI2
rs73702984	Imp	7	78461641	G	A	0.081	1.72	0.000812512	0.087	1.074	0.827385	0.083	1.49	0.004432	MAGI2
rs1528392	Imp	7	80694579	G	A	0.153	1.58	0.000108568	0.166	0.827	0.74858	0.157	1.32	0.003127	SEMA3C/HGF
rs327670	Imp	7	80779426	G	A	0.839	0.69	0.000472148	0.83	1.292	0.252773	0.836	0.82	0.02998	SEMA3C/HGF
rs1557658	Geno	7	93966036	C	T	0.113	1.52	0.000796239	0.12	1.159	0.273641	0.115	1.39	0.0007735	BET1/COL1A2
rs7779685	Imp	7	95622763	A	G	0.593	0.69	0.000229508	0.579	0.956	0.698359	0.589	0.77	0.001295	DYNC1I1
rs113807310	Imp	7	105129582	A	G	0.175	1.56	0.000481411	0.184	1.132	0.342998	0.178	1.4	0.000705	PUS7
rs12705391	Imp	7	106415156	G	A	0.447	0.69	0.00094205	0.459	0.865	0.27239	0.451	0.75	0.0008817	CCDC71L/PIK3CG
rs2701682	Imp	7	107295835	A	G	0.759	0.69	0.000603622	0.76	0.736	0.0360174	0.759	0.7	6.102e-05	BCAP29/SLC26A4
rs10258091	Imp	7	114952774	T	C	0.944	0.54	0.000217953	0.947	1.286	0.359205	0.945	0.65	0.01366	MDFIC/TFEC
rs9641708	Imp	7	122951122	C	A	0.33	1.43	0.000508374	0.337	1.052	0.544814	0.333	1.3	0.001495	SLC13A1/IQUB
rs58579472	Imp	7	123237754	G	A	0.283	0.63	0.000150986	0.298	0.874	0.470921	0.288	0.71	0.00047	ASB15
rs6952111	Imp	7	124952798	C	T	0.463	1.45	0.000964394	0.452	0.867	0.567371	0.459	1.23	0.019	POT1/GRM8
rs929731	Geno	7	131315092	A	G	0.681	0.71	0.000371406	0.679	1.345	0.169451	0.681	0.85	0.03685	PODXL/PLXNA4
rs6950129	Imp	7	131965467	G	A	0.079	0.4	0.000156343	0.081	1.095	0.575925	0.079	0.65	0.006095	PLXNA4
rs292710	Imp	7	134994079	C	G	0.093	1.71	0.000219524	0.099	1.32	0.330804	0.095	1.59	0.00036	STRA8/CNOT4
rs76742203	Imp	7	135812485	G	C	0.062	2.03	0.000183521	0.073	1.381	0.532905	0.066	1.82	0.0006718	LUZP6/CHRM2
rs6974016	Imp	7	140044979	T	C	0.673	1.57	0.000528732	0.678	0.991	0.835973	0.675	1.33	0.007089	SLC37A3
rs17170636	Imp	7	147361097	A	G	0.068	1.76	0.000491718	0.061	0.998	0.836222	0.065	1.53	0.006757	CNTNAP2
rs6957883	Geno	7	148239179	T	C	0.609	1.44	0.000863763	0.613	0.81	0.316957	0.61	1.17	0.03399	CNTNAP2/C7orf33
rs55779713	Imp	7	153107614	T	C	0.054	1.88	0.00066494	0.05	0.91	0.872733	0.053	1.62	0.004282	ACTR3B/DPP6
rs7782562	Imp	7	154432954	A	C	0.115	0.46	0.000379706	0.105	1.174	0.755679	0.112	0.7	0.006866	DPP6
rs920023	Geno	7	157734314	G	A	0.242	1.39	0.000515899	0.241	0.881	0.277504	0.242	1.22	0.02891	PTPRN2
rs12698182	Imp	7	158050049	G	A	0.13	1.5	0.000632111	0.127	0.912	0.66362	0.129	1.32	0.01172	PTPRN2
rs896523	Geno	8	520044	G	A	0.885	1.81	0.000808083	0.89	1.246	0.262485	0.887	1.57	0.0007412	TDRP/ERICH1
rs13273639	Imp	8	1357874	C	T	0.309	1.42	0.000432673	0.311	0.897	0.457944	0.31	1.22	0.01537	ERICH1/DLGAP2
rs11782484	Imp	8	3039324	G	A	0.174	0.62	0.000609869	0.174	1.233	0.18201	0.174	0.83	0.04519	CSMD1
rs7822374	Imp	8	3136705	G	C	0.061	2.03	0.000137624	0.062	0.653	0.206954	0.061	1.63	0.01837	CSMD1
rs10098012	Imp	8	4681069	T	A	0.055	1.97	0.000139491	0.055	0.388	0.0852217	0.055	1.52	0.03687	CSMD1
rs9314544	Imp	8	4683497	A	T	0.079	1.81	5.03205e-06	0.081	0.526	0.0386871	0.08	1.45	0.01251	CSMD1
rs2980942	Geno	8	6719487	G	A	0.49	1.46	0.000370851	0.497	1.107	0.623268	0.493	1.33	0.001489	XKR5/DEFB1
rs13259639	Imp	8	9703470	G	A	0.156	1.67	0.000894342	0.14	0.887	0.866982	0.151	1.4	0.009354	TNKS/MSRA
rs73221659	Imp	8	13563865	G	A	0.056	0.27	0.000660519	0.06	1.378	0.59885	0.057	0.74	0.014	C8orf48/SGCZ
rs74512756	Imp	8	14447741	C	T	0.13	1.61	0.000113946	0.121	1.057	0.815599	0.127	1.44	0.00108	SGCZ
rs112372260	Imp	8	17493644	T	A	0.057	1.81	0.000172703	0.059	1.205	0.746703	0.058	1.62	0.001205	PDGFRL
rs7001155	Imp	8	18995907	T	A	0.17	1.49	0.000207628	0.193	0.838	0.170945	0.178	1.27	0.02697	PSD3/SH2D4A
rs4732803	Geno	8	27887575	T	C	0.212	0.64	0.000713203	0.22	0.83	0.285913	0.215	0.7	0.0007499	NUGGC
rs34150396	Imp	8	28051161	G	A	0.28	1.45	0.000436867	0.263	0.846	0.381868	0.275	1.25	0.01906	ELP3/PNOC
rs117019146	Imp	8	30874878	A	G	0.051	2.22	6.61536e-05	0.054	0.895	0.657787	0.052	1.78	0.002881	PURG
rs7814439	Imp	8	33535975	A	G	0.282	1.39	0.000784887	0.29	0.985	0.837088	0.285	1.25	0.00916	DUSP26/UNC5D
rs28559788	Imp	8	37501860	C	A	0.196	0.58	0.000451759	0.187	0.762	0.334605	0.193	0.64	0.000647	KCNU1/ZNF703
rs113510358	Imp	8	37663290	A	G	0.102	0.31	2.24584e-05	0.1	0.775	0.210376	0.102	0.49	3.012e-05	GPR124
rs68120123	Imp	8	40681893	A	G	0.13	1.49	0.000575421	0.136	0.8	0.386848	0.132	1.28	0.02204	ZMAT4
rs11774072	Geno	8	53433015	C	T	0.264	1.44	0.000403016	0.246	1.406	0.0882616	0.258	1.43	0.0001099	ST18/FAM150A
rs115130114	Imp	8	53823045	C	T	0.07	1.78	0.000367611	0.061	1.716	0.170075	0.067	1.76	0.0002216	RB1CC1/NPBWR1
rs59455852	Imp	8	81064312	G	A	0.088	1.73	0.000706755	0.083	1.729	0.0128605	0.086	1.73	2.644e-05	TPD52
rs12676573	Imp	8	82157192	G	T	0.186	1.49	0.000517902	0.19	0.762	0.330508	0.187	1.24	0.02446	PAG1/FABP5
rs28405532	Imp	8	102374335	G	A	0.11	1.67	0.000313917	0.109	0.581	0.0943381	0.11	1.34	0.05136	ZNF706/GRHL2
rs800877	Imp	8	116481788	C	T	0.834	0.67	0.000737173	0.844	1.207	0.245959	0.837	0.77	0.03915	TRPS1
rs16889515	Imp	8	118237265	C	G	0.057	1.63	0.000805114	0.056	0.81	0.682941	0.057	1.37	0.01307	SLC30A8/MED30
rs62526756	Imp	8	121698597	T	C	0.074	0.33	0.000809624	0.075	1.715	0.146094	0.074	0.81	0.06143	SNTB1
rs9643176	Imp	8	123819795	T	G	0.514	1.47	0.000563417	0.527	0.822	0.122434	0.518	1.22	0.05774	ZHX2
rs7837688	Geno	8	128539360	G	T	0.89	0.59	8.86362e-05	0.88	0.983	0.741773	0.887	0.68	0.002793	POU5F1B/CASC11
rs10103789	Imp	8	130928579	A	C	0.074	1.68	0.000553773	0.084	1.246	0.394117	0.077	1.52	0.0009634	FAM49B
rs4352833	Imp	8	132397859	T	C	0.918	0.61	0.000486	0.936	0.962	0.639018	0.924	0.68	0.001898	ADCY8/EFR3A
rs72731589	Imp	8	134310841	T	C	0.097	1.69	0.000295112	0.095	0.887	0.610956	0.096	1.44	0.008259	NDRG1
rs28833242	Imp	8	135247053	T	C	0.151	1.76	1.036e-05	0.153	1.238	0.137992	0.151	1.57	8.756e-06	ST3GAL1/ZFAT
rs4243847	Geno	8	136671060	G	A	0.945	0.54	0.000711322	0.947	0.786	0.105719	0.946	0.6	0.0002218	KHDRBS3/FAM135B
rs4961254	Imp	8	142199506	A	T	0.097	1.78	0.00017254	0.098	1.249	0.498677	0.097	1.62	0.0005725	DENND3
rs13260672	Imp	8	143323551	C	A	0.239	1.79	1.29812e-05	0.235	0.791	0.525427	0.238	1.41	0.00153	TSNARE1
rs2297081	Imp	9	421980	A	T	0.562	1.46	0.000734298	0.544	1.114	0.534222	0.556	1.33	0.001909	DOCK8
rs36036004	Imp	9	2650914	A	G	0.226	0.67	0.000392244	0.207	1.212	0.511561	0.22	0.84	0.0126	VLDLR
rs79019686	Imp	9	3008180	C	T	0.059	2.2	0.000172755	0.052	1.321	0.406225	0.057	1.93	0.0004093	KIAA0020/RFX3
rs2380941	Geno	9	4178016	A	G	0.187	1.5	0.000409644	0.186	1.403	0.0502667	0.187	1.47	6.023e-05	GLIS3
rs10974387	Imp	9	4197639	C	A	0.071	1.75	0.000346848	0.074	1.374	0.166437	0.072	1.62	0.0002054	GLIS3
rs2381626	Geno	9	7517429	T	G	0.807	0.64	0.000286839	0.822	1.219	0.632495	0.812	0.76	0.007697	KDM4C/TMEM261
rs10977057	Imp	9	8408692	C	T	0.246	0.66	0.000447794	0.221	0.941	0.490688	0.238	0.74	0.001146	PTPRD
rs17234745	Imp	9	11081182	C	T	0.161	1.42	0.000607577	0.17	1.385	0.0599014	0.164	1.4	0.0001037	PTPRD/TYRP1
rs7866901	Imp	9	16131131	A	G	0.055	2.12	0.000386057	0.053	1.186	0.563356	0.054	1.82	0.001287	CCDC171/C9orf92
rs684738	Imp	9	26295831	T	C	0.832	1.68	0.000847457	0.826	0.677	0.0374554	0.83	1.12	0.1352	TUSC1/CAAP1
rs77949268	Imp	9	26738366	A	G	0.116	0.55	0.000976364	0.11	1.118	0.995129	0.114	0.74	0.007356	TUSC1/CAAP1
rs13287341	Imp	9	36816304	G	A	0.286	0.69	0.000546133	0.294	0.874	0.270618	0.289	0.75	0.0005612	MELK/PAX5
rs6476588	Imp	9	36851754	T	C	0.467	0.7	0.000981719	0.46	1.016	0.978019	0.465	0.8	0.007112	PAX5
rs62536879	Imp	9	38084431	T	A	0.384	0.65	0.000350445	0.368	0.933	0.471445	0.379	0.74	0.0008919	SHB/ALDH1B1
rs4878750	Geno	9	38098363	C	T	0.756	0.65	3.88674e-05	0.749	0.987	0.621176	0.753	0.73	0.0002852	SHB/ALDH1B1
rs7048262	Imp	9	71507683	G	A	0.943	0.56	0.000761428	0.936	0.691	0.14573	0.941	0.6	0.0003405	PIP5K1B
rs62570239	Imp	9	72037494	A	T	0.066	1.79	0.000388662	0.064	1.036	0.749776	0.065	1.55	0.002168	FAM189A2/APBA1
rs7047978	Imp	9	78482352	A	C	0.233	1.49	0.000251339	0.22	1.236	0.420019	0.229	1.41	0.0005757	OSTF1/PCSK5
rs12551094	Imp	9	79558431	G	C	0.231	1.55	0.000255636	0.227	1.329	0.150354	0.23	1.48	0.00014	PCA3/FOXB2
rs112897957	Imp	9	84825845	A	G	0.052	1.78	0.000892909	0.049	1.241	0.43024	0.051	1.62	0.001591	SPATA31B1/RASEF
rs3901474	Imp	9	92984277	G	C	0.075	2.28	4.33185e-06	0.087	1.156	0.416972	0.079	1.86	2.622e-05	GADD45G/DIRAS2
rs10992711	Imp	9	96115678	A	G	0.208	1.44	0.000199424	0.209	1.098	0.297606	0.209	1.33	0.0002857	C9orf129/FAM120AOS
rs4744456	Imp	9	98106714	T	C	0.351	0.66	0.000462954	0.362	0.919	0.650967	0.354	0.74	0.001893	FANCC/PTCH1
rs10993528	Imp	9	98149477	G	A	0.071	1.73	0.000669957	0.078	1.258	0.481039	0.073	1.56	0.001509	FANCC/PTCH1
rs16921805	Imp	9	105323260	T	C	0.26	1.46	0.000373448	0.263	0.765	0.261221	0.261	1.22	0.02558	PPP3R2/CYLC2
rs5022130	Imp	9	106241014	A	G	0.857	0.64	0.000412113	0.854	1.098	0.773636	0.856	0.76	0.006944	CYLC2/SMC2
rs1393004	Imp	9	107819215	C	T	0.2	0.58	5.00701e-05	0.204	1.082	0.864675	0.201	0.74	0.00141	ABCA1/SLC44A1
rs28729182	Imp	9	110746766	T	A	0.111	1.59	0.000418521	0.121	1.104	0.637433	0.114	1.42	0.001693	KLF4/ACTL7B
rs10759448	Imp	9	113366860	C	T	0.427	1.4	0.000439178	0.421	0.896	0.187109	0.425	1.21	0.03721	SVEP1/MUSK
rs10817276	Imp	9	114933834	A	G	0.322	0.7	0.000749296	0.327	0.979	0.811302	0.324	0.79	0.004029	SUSD1
rs2645988	Imp	9	115531319	C	T	0.811	1.79	3.58631e-05	0.808	1.153	0.247997	0.81	1.51	5.591e-05	SNX30
rs62577504	Imp	9	118154384	T	C	0.163	1.49	0.000487852	0.152	1.507	0.0685216	0.16	1.49	9.832e-05	DEC1
rs7046256	Imp	9	118320425	A	G	0.647	0.71	0.000563325	0.667	0.843	0.127414	0.653	0.75	0.0002244	DEC1/PAPPA
rs540178	Geno	9	120309723	T	C	0.783	0.68	0.000286797	0.781	0.988	0.842053	0.782	0.76	0.002208	TRIM32/TLR4
rs592286	Imp	9	124351810	A	G	0.282	0.64	0.000564786	0.269	0.922	0.753992	0.278	0.73	0.002863	DAB2IP
rs62583767	Imp	9	126948851	A	T	0.09	1.83	0.000131002	0.074	1.064	0.380754	0.085	1.61	0.0002985	LHX2/NEK6
rs72761498	Imp	9	127423604	A	G	0.071	0.39	0.000663909	0.074	0.509	0.0953749	0.072	0.43	0.000186	NR6A1/MIR181A2HG
rs2152833	Geno	9	131331320	T	C	0.902	0.59	0.000994028	0.905	1.177	0.548932	0.903	0.7	0.0202	SPTAN1
rs28972494	Imp	9	133223261	C	T	0.103	1.87	2.46627e-05	0.11	1.25	0.491808	0.105	1.63	0.0001305	HMCN2
rs12349262	Imp	9	135649679	C	G	0.643	0.68	0.000649811	0.642	1.206	0.117071	0.643	0.81	0.06387	AK8
rs803437	Imp	9	136773201	T	C	0.569	0.68	0.000178486	0.567	1.257	0.0797286	0.569	0.83	0.04347	VAV2
rs7042174	Imp	9	136781655	C	A	0.183	0.51	1.56733e-05	0.169	0.76	0.409029	0.179	0.59	6.655e-05	VAV2
rs117907571	Imp	9	140069023	T	C	0.054	2.05	0.000840546	0.047	0.426	0.0584467	0.052	1.65	0.1083	TMEM210/ANAPC2
rs10114787	Imp	9	140294133	G	A	0.158	1.63	0.000710485	0.172	1.05	0.969277	0.162	1.44	0.006413	EXD3
rs6602047	Imp	10	3414676	T	A	0.739	1.64	0.000572476	0.745	1.133	0.453186	0.741	1.43	0.00122	PITRM1/KLF6
rs17135209	Geno	10	3442533	T	C	0.186	1.49	0.000872931	0.197	0.939	0.865496	0.19	1.29	0.005094	PITRM1/KLF6
rs12219268	Imp	10	9071083	C	T	0.368	0.66	0.000105409	0.373	0.804	0.0734404	0.37	0.71	2.749e-05	GATA3/CELF2
rs1663665	Imp	10	9075034	C	A	0.254	1.63	4.52952e-06	0.277	1.158	0.252225	0.261	1.46	1.128e-05	GATA3/CELF2
rs7902057	Geno	10	10240837	C	A	0.375	1.4	5.92209e-05	0.365	0.956	0.641478	0.372	1.25	0.0004124	GATA3/CELF2
rs11257398	Imp	10	11936810	C	G	0.402	1.35	0.000862084	0.423	0.899	0.392	0.409	1.19	0.02745	PROSER2/UPF2
rs77307182	Imp	10	12516444	A	G	0.064	0.36	0.000713573	0.075	1.185	0.800816	0.067	0.7	0.00932	CAMK1D
rs61838560	Imp	10	14175916	G	T	0.063	1.78	0.000127654	0.078	1.252	0.839257	0.068	1.59	0.001245	FRMD4A
rs7923519	Imp	10	14186139	C	T	0.637	0.66	4.80089e-05	0.614	0.782	0.226505	0.63	0.7	6.168e-05	FRMD4A
rs7909378	Imp	10	17586929	G	A	0.582	1.59	6.27356e-05	0.564	1.16	0.385312	0.576	1.42	0.0001727	ST8SIA6/PTPLA
rs111315046	Imp	10	20251421	A	G	0.1	1.61	0.000742789	0.106	0.608	0.170178	0.102	1.27	0.05268	PLXDC2
rs10764181	Geno	10	20279125	A	C	0.632	1.42	0.000909623	0.632	1.144	0.384494	0.632	1.31	0.001371	PLXDC2
rs7910912	Imp	10	21469291	G	A	0.297	0.59	6.2602e-05	0.284	0.955	0.4973	0.293	0.7	0.004329	C10orf113/CASC10
rs1938048	Geno	10	24206076	T	C	0.307	1.42	0.000915135	0.318	1.05	0.876268	0.311	1.3	0.005396	KIAA1217
rs7909222	Imp	10	50773896	G	A	0.226	1.4	0.000691475	0.229	0.979	0.866982	0.227	1.25	0.004342	ERCC6-PGBD3/CHAT
rs184589040	Imp	10	57361698	T	C	0.053	1.74	0.000793136	0.059	1.256	0.314673	0.055	1.58	0.0009301	PCDH15
rs12784595	Imp	10	60881751	C	G	0.114	1.74	0.000458487	0.112	1.012	0.480922	0.113	1.49	0.00113	BICC1/PHYHIPL
rs4948229	Imp	10	61051837	C	T	0.274	1.52	8.87447e-05	0.271	1.169	0.412406	0.273	1.41	0.0002518	FAM13C
rs74158904	Imp	10	64193953	A	G	0.137	0.51	0.00053437	0.117	0.742	0.284198	0.131	0.59	0.0005892	ZNF365
rs12355272	Geno	10	67792731	A	C	0.299	1.49	1.87496e-05	0.314	0.812	0.311209	0.304	1.23	0.003944	CTNNA3
rs10997943	Imp	10	69900776	G	A	0.571	1.49	0.000585545	0.581	0.874	0.361859	0.574	1.24	0.0239	MYPN
rs2673801	Geno	10	69909513	T	C	0.46	1.48	0.000629654	0.458	1.159	0.317675	0.459	1.36	0.0007833	MYPN
rs6584391	Imp	10	83653738	C	T	0.939	0.43	0.000109313	0.931	1.668	0.528063	0.937	0.57	0.005565	NRG3
rs78761203	Imp	10	87706715	A	G	0.05	1.91	6.20189e-05	0.048	1.39	0.189609	0.05	1.75	5.889e-05	GRID1
rs10786145	Imp	10	95609383	A	G	0.392	1.43	0.000506922	0.389	0.979	0.572249	0.391	1.27	0.01267	LGI1/SLC35G1
rs6584389	Imp	10	102469402	A	C	0.499	1.44	0.000799061	0.513	1.016	0.64577	0.504	1.28	0.002785	HIF1AN/PAX2
rs61875724	Imp	10	108055611	G	A	0.051	2.56	4.28045e-05	0.054	1.488	0.212393	0.052	2.16	5.124e-05	SORCS3/SORCS1
rs28590367	Imp	10	109513201	C	T	0.071	1.82	5.02281e-05	0.07	0.954	0.738844	0.071	1.57	0.001956	SORCS1/XPNPEP1
rs59064184	Imp	10	122122108	A	G	0.141	1.64	0.000410589	0.152	0.806	0.56868	0.145	1.34	0.01123	SEC23IP/PPAPDC1A
rs17101187	Imp	10	122714701	G	T	0.248	0.62	0.000221426	0.247	0.756	0.291721	0.248	0.66	0.0003017	WDR11/FGFR2
rs11200380	Imp	10	123834176	T	C	0.083	1.87	6.53744e-05	0.08	0.759	0.242295	0.082	1.52	0.01052	TACC2
rs66607876	Imp	10	124120919	C	G	0.115	1.82	3.02521e-06	0.118	0.975	0.77928	0.116	1.55	0.000287	BTBD16/PLEKHA1
rs11597511	Imp	10	125484717	G	A	0.192	1.48	9.11919e-05	0.198	0.842	0.206285	0.194	1.27	0.01475	CPXM2
rs28547099	Imp	10	125791455	T	C	0.318	1.57	1.64883e-05	0.325	0.719	0.10994	0.32	1.26	0.01036	CHST15
rs10736874	Geno	10	128271632	T	C	0.841	0.67	0.000584928	0.835	0.772	0.227559	0.839	0.7	0.0004723	C10orf90
rs34898564	Imp	10	129275370	A	G	0.097	0.49	0.000574455	0.09	0.745	0.1416	0.095	0.57	0.0002585	FAM196A/NPS
rs7920377	Imp	10	130219566	A	T	0.592	0.74	0.000363907	0.597	1.145	0.490162	0.594	0.84	0.01273	MKI67/MGMT
rs11156473	Imp	10	133604868	A	G	0.148	0.56	0.000756469	0.139	0.97	0.907126	0.145	0.69	0.005071	TCERG1L/PPP2R2D
rs2301569	Imp	11	3400133	T	C	0.073	0.35	0.000145949	0.07	1.041	0.826944	0.072	0.62	0.003122	ZNF195
rs1487871	Imp	11	7403023	T	C	0.936	0.51	5.2991e-05	0.935	2.218	0.0380714	0.936	0.65	0.03843	SYT9
rs897102	Geno	11	8331494	T	C	0.822	0.68	0.00022976	0.824	1.589	0.0544182	0.823	0.83	0.06185	LMO1/STK33
rs74370316	Imp	11	12474487	A	G	0.089	1.78	0.000574403	0.098	1.079	0.870472	0.091	1.53	0.003845	PARVA
rs34274306	Imp	11	15781804	C	G	0.273	1.43	0.000671533	0.271	1.115	0.678239	0.272	1.32	0.002672	INSC/SOX6
rs72873810	Imp	11	17867501	G	A	0.077	1.9	0.000105962	0.065	0.921	0.554878	0.073	1.63	0.005076	SERGEF
rs10836340	Imp	11	35217745	C	T	0.656	1.51	0.000209585	0.678	1.03	0.921332	0.663	1.33	0.002161	CD44
rs7937731	Imp	11	35314299	C	G	0.874	1.8	0.000973107	0.887	1.327	0.279498	0.878	1.61	0.0009364	SLC1A2
rs1049272	Imp	11	57174630	C	A	0.11	0.51	0.000387244	0.114	0.734	0.228956	0.112	0.6	0.0003393	SLC43A3
rs174555	Imp	11	61579760	C	T	0.286	1.45	0.000312895	0.305	0.951	0.531339	0.292	1.29	0.01045	FADS2/FADS1
rs117340654	Imp	11	67383189	T	C	0.05	2.16	0.000476923	0.052	1.077	0.966695	0.05	1.8	0.00493	NDUFV1/NUDT8
rs12364154	Imp	11	70352008	T	C	0.185	1.47	0.00054841	0.188	1.031	0.829223	0.186	1.33	0.007372	SHANK2
rs11235500	Imp	11	72149533	A	G	0.855	1.83	0.000533425	0.863	1.069	0.825108	0.858	1.47	0.003276	CLPB/PDE2A
rs1995892	Geno	11	75645950	G	A	0.462	0.69	0.000115346	0.475	0.793	0.0709874	0.466	0.72	2.858e-05	UVRAG
rs3740778	Geno	11	76372418	C	T	0.868	0.61	0.00018085	0.855	0.863	0.310995	0.863	0.68	0.000282	LRRC32
rs1871379	Imp	11	80015924	G	C	0.299	1.37	0.00076784	0.297	0.945	0.558621	0.298	1.21	0.01687	TENM4/FAM181B
rs493069	Imp	11	87801088	C	T	0.422	1.5	0.000226655	0.421	0.902	0.274318	0.422	1.26	0.01852	TMEM135/RAB38
rs217073	Imp	11	88067764	C	T	0.191	1.54	8.68915e-05	0.184	0.898	0.52199	0.188	1.33	0.004922	CTSC
rs78920053	Imp	11	91873984	C	G	0.074	2.01	0.000194484	0.068	0.852	0.969243	0.072	1.65	0.002309	DISC1FP1/FAT3
rs17806593	Geno	11	95730903	G	A	0.29	1.44	0.000791474	0.278	1.188	0.373148	0.286	1.35	0.001178	MAML2
rs2851655	Imp	11	97731658	A	T	0.179	1.66	2.10993e-05	0.187	1.266	0.691249	0.182	1.52	0.0002292	JRKL/CNTN5
rs2656204	Imp	11	99379574	A	G	0.292	0.76	0.00079114	0.269	0.769	0.117182	0.284	0.76	0.0002735	CNTN5
rs2186990	Imp	11	102290601	A	G	0.506	0.68	0.000388615	0.493	0.928	0.923794	0.502	0.76	0.003326	TMEM123
rs2510090	Imp	11	102958177	G	A	0.229	1.51	0.000704244	0.202	1.042	0.834695	0.22	1.35	0.004076	DCUN1D5
rs4754330	Imp	11	108470231	A	T	0.107	1.6	0.000280536	0.109	0.769	0.732425	0.107	1.33	0.005972	EXPH5/DDX10
rs491823	Imp	11	114082956	A	C	0.781	0.68	0.000589804	0.78	0.866	0.296724	0.781	0.74	0.0006766	ZBTB16
rs2604294	Geno	11	114156318	C	T	0.738	0.7	0.000679257	0.749	1.381	0.17136	0.741	0.84	0.05004	NNMT
rs7946809	Imp	11	115516486	T	G	0.121	0.51	0.000595682	0.103	0.861	0.466481	0.115	0.62	0.001315	CADM1/BUD13
rs2060009	Geno	11	121206354	A	G	0.724	1.59	0.000214672	0.72	1.073	0.668626	0.723	1.37	0.001136	SC5D/SORL1
rs2370778	Imp	11	122474182	T	A	0.094	0.45	0.00032568	0.098	1.267	0.613664	0.095	0.77	0.008721	BLID/UBASH3B
rs10750219	Geno	11	122558850	C	T	0.452	1.53	0.000255672	0.452	0.964	0.747443	0.452	1.3	0.00543	UBASH3B
rs73030852	Imp	11	123980680	T	C	0.074	1.77	0.000601883	0.079	0.805	0.326831	0.076	1.48	0.02693	OR10G7/VWA5A
rs2156155	Geno	11	124494303	A	G	0.448	1.39	0.000473866	0.439	1.143	0.482532	0.445	1.31	0.001165	TBRG1
rs687491	Imp	11	126105452	T	C	0.196	0.58	7.35273e-05	0.208	0.957	0.723826	0.2	0.71	0.002594	FAM118B
rs78358306	Imp	11	129607729	C	T	0.075	1.91	0.000432859	0.072	1.419	0.0364865	0.074	1.74	4.539e-05	BARX2/TMEM45B
rs731446	Geno	11	130339312	C	T	0.626	0.67	7.06977e-05	0.626	0.87	0.289046	0.626	0.73	0.0001205	ADAMTS15
rs12290171	Imp	11	134097161	T	C	0.05	1.92	0.000710284	0.049	0.984	0.496037	0.05	1.66	0.01873	VPS26B
rs57408987	Imp	12	249287	A	G	0.06	1.98	0.000965237	0.05	1.063	0.60008	0.057	1.72	0.002831	IQSEC3
rs3902269	Imp	12	271999	G	T	0.358	1.38	0.00053028	0.357	0.843	0.179509	0.358	1.19	0.04245	IQSEC3
rs73597943	Imp	12	1510592	A	G	0.084	1.91	0.0003154	0.083	1.365	0.314092	0.084	1.73	0.0004444	ERC1
rs79920526	Imp	12	3450005	T	C	0.105	0.53	0.000403163	0.097	0.949	0.802206	0.102	0.67	0.002541	TSPAN9-IT1/PRMT8
rs10848886	Imp	12	3710843	T	C	0.116	0.5	0.00053198	0.118	1.2	0.553651	0.117	0.75	0.01365	PRMT8/EFCAB4B
rs12827982	Imp	12	8521677	T	C	0.09	0.36	0.000465009	0.094	0.902	0.621347	0.091	0.55	0.001749	FAM90A1/CLEC6A
rs2896042	Imp	12	10341719	G	T	0.215	0.61	0.000209281	0.206	1.472	0.0464172	0.212	0.85	0.06477	TMEM52B
rs73057966	Imp	12	10352841	G	C	0.116	1.57	0.00011748	0.112	0.855	0.564238	0.115	1.35	0.005273	TMEM52B/GABARAPL1
rs4763440	Geno	12	16308792	C	A	0.197	1.54	0.000937905	0.198	0.805	0.293057	0.197	1.28	0.03828	DERA/SLC15A5
rs10770396	Imp	12	18897835	T	C	0.938	0.59	0.000871686	0.937	0.788	0.747362	0.938	0.64	0.003846	CAPZA3/PLEKHA5
rs10770414	Imp	12	19116885	G	A	0.655	1.51	0.000329141	0.667	0.923	0.576446	0.659	1.26	0.00962	CAPZA3/PLEKHA5
rs76830044	Imp	12	27427655	A	G	0.061	1.97	0.000568428	0.049	0.772	0.425075	0.057	1.66	0.01971	STK38L
rs7959587	Imp	12	29159781	G	C	0.084	1.68	0.000894454	0.101	0.772	0.383502	0.089	1.37	0.02869	CCDC91/FAR2
rs2712579	Imp	12	45977048	A	G	0.415	1.49	0.000245009	0.396	1.006	0.907988	0.409	1.31	0.003617	ANO6/ARID2
rs4760608	Geno	12	48368989	C	A	0.178	0.6	0.000932162	0.178	0.694	0.136024	0.178	0.63	0.000374	COL2A1
rs2731077	Imp	12	48925191	G	A	0.73	1.5	0.000908404	0.736	0.768	0.212306	0.732	1.16	0.04944	OR8S1/LALBA
rs4758989	Imp	12	55338517	C	T	0.228	1.51	8.65941e-05	0.236	0.998	0.642424	0.231	1.33	0.0005447	MUCL1/TESPA1
rs56204857	Imp	12	55340920	A	G	0.052	2.19	3.74673e-06	0.048	0.576	0.251699	0.051	1.73	0.002034	MUCL1/TESPA1
rs1908537	Geno	12	58838826	G	A	0.51	1.48	0.000273043	0.524	1.016	0.821207	0.515	1.31	0.002024	XRCC6BP1/RP11-362K2.2
rs56042852	Imp	12	59389355	G	C	0.097	0.44	0.000111066	0.088	1.034	0.561508	0.094	0.67	0.005132	LRIG3/SLC16A7
rs1251766	Imp	12	63788982	T	C	0.388	0.75	0.000861279	0.397	1.104	0.826166	0.391	0.86	0.009968	AVPR1A/DPY19L2
rs12815229	Imp	12	66119566	A	G	0.069	1.91	8.41931e-05	0.069	1.284	0.173801	0.069	1.72	6.711e-05	MSRB3/HMGA2
rs11176419	Imp	12	67161647	C	T	0.051	2.09	0.000124427	0.047	1.109	0.418445	0.049	1.78	0.0003338	GRIP1
rs1394266	Imp	12	67341654	A	G	0.067	1.84	6.92089e-05	0.073	0.84	0.492204	0.069	1.53	0.004668	GRIP1/CAND1
rs12228270	Imp	12	68767509	T	C	0.119	1.64	2.45232e-05	0.122	1.135	0.33209	0.12	1.48	6.566e-05	MDM1/RAP1B
rs2367444	Geno	12	76399896	C	T	0.47	1.49	4.44999e-05	0.462	0.958	0.774402	0.468	1.29	0.001649	KRR1/PHLDA1
rs1270771	Imp	12	78355651	A	G	0.855	0.63	7.52555e-05	0.866	1.026	0.852473	0.859	0.72	0.000892	NAV3
rs1947350	Imp	12	85228470	G	A	0.732	0.66	0.00011647	0.737	1.245	0.158094	0.733	0.79	0.02122	TMTC2/SLC6A15
rs76689986	Imp	12	86990789	C	G	0.056	1.99	0.000294663	0.057	1.273	0.506527	0.056	1.75	0.0008792	MGAT4C
rs17194635	Imp	12	94235477	G	A	0.243	1.52	0.000172667	0.247	1.177	0.411403	0.244	1.4	0.0004175	CRADD
rs3816838	Imp	12	95668437	T	G	0.373	1.39	0.000708924	0.363	0.845	0.498495	0.369	1.19	0.01859	VEZT
rs7313597	Imp	12	98731214	C	A	0.901	0.61	0.000804768	0.905	0.868	0.37766	0.902	0.68	0.001214	RMST/TMPO
rs11109920	Imp	12	99957542	G	A	0.262	0.59	5.35255e-05	0.245	1.018	0.746269	0.256	0.72	0.0005237	ANKS1B
rs78323196	Imp	12	101631406	T	C	0.05	2.2	0.00021692	0.053	1.018	0.657258	0.051	1.83	0.001108	SLC5A8/UTP20
rs1404288	Geno	12	103151018	T	C	0.141	1.5	0.000962303	0.125	1.052	0.626254	0.136	1.37	0.01659	IGF1/PAH
rs113638563	Imp	12	105890999	T	C	0.113	1.84	1.78257e-05	0.116	0.998	0.948767	0.114	1.55	0.0005699	C12orf75/CASC18
rs11066542	Imp	12	109860645	A	G	0.065	1.76	4.66822e-05	0.062	0.806	0.625644	0.064	1.47	0.002524	MYO1H
rs11067429	Imp	12	115568402	G	A	0.278	0.65	0.000615404	0.266	1.02	0.678066	0.274	0.77	0.002506	TBX3/MED13L
rs7954608	Imp	12	117508337	G	C	0.544	1.49	0.000744429	0.531	1.115	0.935187	0.54	1.35	0.007135	TESC
rs7969387	Imp	12	128501414	G	T	0.629	0.68	7.04569e-05	0.645	1.083	0.804516	0.634	0.79	0.002055	TMEM132B/TMEM132C
rs12313855	Imp	12	128503447	C	A	0.13	1.74	1.68856e-05	0.127	0.724	0.247419	0.129	1.42	0.004841	TMEM132B/TMEM132C
rs7954948	Imp	12	131125008	C	T	0.76	0.69	0.000919502	0.737	1.139	0.524372	0.753	0.81	0.02042	RIMBP2
rs113366081	Imp	12	132609257	G	A	0.07	2.18	4.35192e-06	0.066	1.092	0.541305	0.069	1.85	4.389e-05	EP400NL
rs4073651	Imp	12	132983739	T	C	0.396	1.46	0.00030898	0.418	0.876	0.412202	0.403	1.24	0.01429	GALNT9/MUC8
rs9580525	Imp	13	23614640	C	T	0.235	0.62	0.000291474	0.244	0.754	0.265274	0.238	0.67	0.0003288	FGF9/SGCG
rs78147149	Imp	13	28278287	T	A	0.052	2.22	3.04535e-05	0.049	0.769	0.397684	0.051	1.77	0.003835	POLR1D/GSX1
rs6490309	Imp	13	29114305	A	T	0.82	0.66	0.00061413	0.811	1.043	0.869718	0.817	0.75	0.004022	FLT1/POMP
rs641545	Imp	13	30707436	G	A	0.607	1.54	0.000153265	0.615	1.103	0.293911	0.609	1.37	0.0002277	UBL3/KATNAL1
rs12864957	Imp	13	38114612	T	C	0.059	2.25	8.05131e-05	0.057	1.359	0.729776	0.058	1.98	0.0006676	CSNK1A1L/POSTN
rs4383023	Geno	13	39188673	T	C	0.751	0.7	0.000770637	0.771	0.988	0.81466	0.757	0.77	0.009506	UFM1/FREM2
rs9534557	Imp	13	47718645	G	A	0.8	1.59	0.000520092	0.809	0.88	0.607391	0.803	1.26	0.01183	HTR2A/SUCLA2
rs9570070	Imp	13	59807752	A	C	0.356	1.5	0.000506893	0.342	1.076	0.538988	0.352	1.36	0.001465	PCDH17/DIAPH3
rs342590	Imp	13	60288929	G	C	0.189	1.49	0.000822375	0.19	0.93	0.953597	0.189	1.29	0.007327	DIAPH3
rs35171800	Imp	13	63937525	A	C	0.207	1.71	5.70844e-06	0.197	1.03	0.402031	0.204	1.47	3.014e-05	PCDH20/PCDH9
rs75675155	Imp	13	70800639	A	T	0.099	0.34	4.33702e-05	0.103	0.787	0.405147	0.1	0.52	0.0001416	ATXN8OS/DACH1
rs9564806	Geno	13	71897083	G	A	0.209	1.66	3.92018e-06	0.2	0.925	0.485314	0.206	1.41	0.0008394	ATXN8OS/DACH1
rs4885372	Imp	13	76572610	C	G	0.627	0.6	4.54269e-07	0.618	1.083	0.310217	0.624	0.72	0.0004605	C13orf45/KCTD12
rs7993393	Imp	13	76670759	G	A	0.242	0.53	3.87255e-06	0.238	0.974	0.77231	0.241	0.68	8.93e-05	C13orf45/KCTD12
rs9601013	Imp	13	78809094	C	G	0.18	0.57	0.000306638	0.18	1.121	0.287323	0.18	0.74	0.02094	EDNRB/POU4F1
rs73250446	Imp	13	82772979	C	T	0.072	1.76	0.0007865	0.083	0.517	0.0578585	0.075	1.36	0.1057	SPRY2/SLITRK1
rs61959945	Imp	13	83838858	T	G	0.093	1.69	0.000325947	0.081	1.414	0.376943	0.089	1.61	0.0005962	SPRY2/SLITRK1
rs149858269	Imp	13	86729175	T	A	0.167	1.47	0.00042145	0.174	1.441	0.180959	0.169	1.46	0.0002686	SLITRK6/MIR4500HG
rs9518838	Imp	13	88562769	A	G	0.281	1.37	0.000699915	0.288	1.338	0.0594038	0.283	1.36	0.0001169	SLITRK5
rs138403256	Imp	13	88953958	A	G	0.058	1.65	0.000973672	0.058	0.776	0.973561	0.058	1.41	0.007003	SLITRK5
rs68016570	Imp	13	91422009	T	C	0.169	1.55	0.00059077	0.152	0.787	0.521961	0.164	1.3	0.01572	MIR17HG
rs1547166	Geno	13	96273327	T	C	0.811	0.63	0.000158841	0.795	0.831	0.306095	0.806	0.69	0.0002486	DZIP1
rs72636519	Imp	13	96302255	A	G	0.252	0.63	0.000979844	0.227	1.002	0.879051	0.244	0.74	0.005696	DZIP1/DNAJC3
rs66752846	Imp	13	98397883	G	A	0.247	0.68	0.000617652	0.24	1.226	0.227644	0.245	0.85	0.03799	RAP2A/IPO5
rs79515118	Imp	13	99081084	T	A	0.064	0.41	0.000598172	0.063	1.182	0.640185	0.064	0.69	0.01195	FARP1
rs556997	Geno	13	101919956	T	C	0.29	1.44	0.000909608	0.282	1.185	0.641816	0.287	1.36	0.003032	NALCN
rs17502680	Geno	13	102558732	G	T	0.051	2.03	4.05886e-05	0.046	0.855	0.841762	0.049	1.69	0.0005641	FGF14
rs61969297	Imp	13	104436201	G	A	0.222	0.59	0.000173433	0.212	1.181	0.320796	0.219	0.78	0.01357	SLC10A2/DAOA
rs9519183	Imp	13	104584765	G	A	0.098	1.6	0.000529012	0.089	1.759	0.069537	0.095	1.64	0.0001074	SLC10A2/DAOA
rs7319323	Imp	13	110955187	C	T	0.288	1.45	0.000433264	0.292	0.981	0.964788	0.289	1.28	0.004642	COL4A1
rs55790286	Imp	14	20871846	G	A	0.178	0.57	0.000581707	0.186	1.511	0.0423901	0.181	0.87	0.108	TEP1
rs11624594	Imp	14	21230172	G	A	0.733	1.5	0.000801988	0.741	0.731	0.0255938	0.736	1.12	0.1563	EDDM3A/EDDM3B
rs179670	Imp	14	31325832	A	G	0.19	1.63	0.000352142	0.183	0.723	0.335227	0.188	1.33	0.01937	SCFD1/COCH
rs1278951	Geno	14	32423630	C	A	0.406	1.43	0.000266452	0.419	1.076	0.694263	0.41	1.31	0.001426	NUBPL/ARHGAP5
rs11621665	Imp	14	33572903	C	T	0.074	1.67	0.000951584	0.082	1.04	0.721298	0.076	1.44	0.003842	NPAS3
rs4903755	Imp	14	40868067	A	G	0.354	1.51	5.01357e-05	0.354	1.031	0.921174	0.354	1.34	0.0008092	FBXO33/LRFN5
rs1669587	Imp	14	41476093	G	A	0.346	0.65	0.000413157	0.348	0.903	0.574243	0.347	0.73	0.001398	FBXO33/LRFN5
rs7148339	Imp	14	44115310	G	T	0.177	1.52	0.000414577	0.183	1.387	0.196965	0.179	1.48	0.0002951	LRFN5/FSCB
rs8018380	Imp	14	45410605	C	T	0.058	1.88	0.000191665	0.055	1.819	0.0158032	0.057	1.86	9.118e-06	KLHL28
rs78889419	Imp	14	46408254	A	T	0.055	1.91	0.000824189	0.053	1.043	0.678277	0.054	1.68	0.003103	MIS18BP1/RPL10L
rs78569997	Imp	14	48713435	G	T	0.06	2.02	0.000588707	0.066	0.741	0.621378	0.062	1.56	0.01236	MDGA2/RPS29
rs9635167	Imp	14	51400631	T	C	0.154	1.55	0.000451074	0.152	1.245	0.413045	0.153	1.45	0.0008811	PYGL
rs4901312	Imp	14	53385526	C	T	0.118	0.54	0.000781728	0.121	0.701	0.0708555	0.119	0.6	0.0001557	FERMT2
rs12886931	Imp	14	55990730	A	C	0.685	0.68	0.000468532	0.694	1.174	0.660273	0.688	0.8	0.009791	TBPL2/KTN1
rs35988541	Imp	14	56191398	G	A	0.092	1.79	0.000423023	0.089	0.879	0.680243	0.091	1.48	0.008763	KTN1/PELI2
rs160458	Imp	14	59074878	C	T	0.475	1.41	0.000317091	0.466	1.099	0.419554	0.472	1.3	0.0006873	KIAA0586/DACT1
rs17116642	Imp	14	72975547	A	T	0.31	0.69	0.000929579	0.321	0.841	0.298751	0.314	0.74	0.0009854	RGS6
rs28458356	Imp	14	74298565	A	G	0.1	1.7	0.000180782	0.096	0.924	0.750867	0.098	1.44	0.001259	ELMSAN1/PTGR2
rs12434708	Imp	14	91330673	A	G	0.107	1.58	0.000532501	0.111	1.082	0.646456	0.108	1.43	0.002071	TTC7B/RPS6KA5
rs7152096	Imp	14	98259535	A	G	0.126	0.44	0.000712931	0.123	0.761	0.472115	0.125	0.55	0.001538	VRK1/C14orf64
rs12914151	Imp	15	22911376	A	T	0.321	0.62	0.000472612	0.316	1.245	0.144747	0.32	0.81	0.047	CYFIP1
rs8034468	Imp	15	22915741	C	G	0.284	1.47	0.000219526	0.292	1.182	0.429537	0.286	1.38	0.0005377	CYFIP1
rs7170417	Imp	15	24224609	A	G	0.082	0.32	0.000279404	0.076	0.846	0.65532	0.08	0.51	0.001325	PWRN4
rs74003498	Imp	15	24495582	T	C	0.097	1.58	0.000515652	0.106	0.787	0.675628	0.1	1.33	0.01003	PWRN2/PWRN3
rs28640042	Imp	15	26858109	C	A	0.263	0.57	1.1039e-05	0.276	0.877	0.372697	0.268	0.67	4.332e-05	GABRB3
rs891345	Geno	15	34018372	T	C	0.178	1.57	0.000258944	0.17	1.121	0.920804	0.175	1.43	0.002496	RYR3
rs34896780	Imp	15	36605319	T	C	0.065	1.84	0.000244114	0.066	0.959	0.785618	0.065	1.55	0.004815	DPH6/C15orf41
rs8030155	Imp	15	37890727	T	A	0.459	0.67	0.000187548	0.476	1.071	0.683289	0.464	0.8	0.005206	MEIS2/TMCO5A
rs1618332	Geno	15	42184794	C	T	0.504	1.39	0.000883858	0.511	1.258	0.112096	0.506	1.34	0.0002866	SPTBN5
rs4924586	Imp	15	42194863	C	T	0.16	1.49	0.000843736	0.145	1.166	0.487599	0.155	1.38	0.001839	EHD4
rs80219001	Imp	15	44468168	T	C	0.054	2.19	0.000385521	0.054	0.583	0.326603	0.054	1.67	0.02095	FRMD5
rs8028825	Imp	15	46799594	C	T	0.378	0.71	0.000727354	0.363	0.958	0.644249	0.373	0.79	0.002589	SQRDL/SEMA6D
rs8042412	Imp	15	47045240	C	G	0.254	0.66	0.000838821	0.252	1.006	0.7668	0.253	0.77	0.003923	SQRDL/SEMA6D
rs2932195	Geno	15	57764353	G	A	0.887	0.6	2.77603e-05	0.872	0.721	0.191168	0.882	0.63	3.105e-05	CGNL1
rs13329672	Geno	15	58699937	T	C	0.244	1.47	0.000513708	0.244	0.89	0.492298	0.244	1.28	0.01557	ALDH1A2
rs72745705	Imp	15	61839769	T	G	0.056	1.89	0.00052999	0.06	0.592	0.241095	0.057	1.48	0.0333	RORA/VPS13C
rs62004642	Imp	15	63075590	A	G	0.097	0.39	0.000283249	0.096	0.981	0.824691	0.097	0.6	0.002096	TLN2
rs11637246	Imp	15	65153610	T	C	0.115	0.48	0.00053902	0.116	1.478	0.034115	0.116	0.82	0.1159	PLEKHO2
rs60223444	Imp	15	66424775	T	G	0.051	1.88	0.000760157	0.044	0.981	0.936651	0.049	1.62	0.005441	MEGF11
rs7162222	Imp	15	67316956	C	G	0.513	1.42	0.000854972	0.506	1.001	0.739868	0.511	1.27	0.01197	SMAD6/SMAD3
rs548525	Imp	15	73627871	G	C	0.888	0.51	3.35916e-05	0.884	0.925	0.907259	0.887	0.6	0.0005923	HCN4
rs28362921	Imp	15	74706565	T	C	0.05	1.95	0.000110285	0.041	1.417	0.373946	0.047	1.8	0.000254	SEMA7A
rs28380635	Imp	15	86083903	C	A	0.192	1.57	3.46034e-05	0.194	1.12	0.657712	0.193	1.42	0.0002943	AKAP13
rs2280470	Imp	15	89395626	G	A	0.66	0.62	1.74359e-05	0.661	1.099	0.427494	0.66	0.74	0.002497	ACAN
rs56242941	Imp	15	90309286	C	G	0.05	2.21	0.000503452	0.047	2.083	0.0148634	0.049	2.16	2.172e-05	MESP2
rs998434	Geno	15	91599600	T	C	0.255	1.49	0.000292338	0.257	0.611	0.0138077	0.255	1.18	0.1329	VPS33B/SV2B
rs113719999	Imp	15	95558682	A	G	0.212	1.52	0.000556989	0.219	1.238	0.29713	0.214	1.42	0.0006474	MCTP2/NR2F2
rs8043229	Imp	15	101330156	T	C	0.068	1.94	0.000250092	0.08	1.043	0.867704	0.072	1.61	0.002139	ASB7/ALDH1A3
rs8039456	Geno	15	102096495	T	C	0.437	0.71	0.000470837	0.41	1.145	0.432985	0.428	0.83	0.01727	PCSK6/TM2D3
rs8052265	Imp	16	7262053	T	G	0.154	1.47	0.000511103	0.146	1.117	0.19122	0.151	1.36	0.0003382	RBFOX1
rs12921458	Imp	16	7403932	A	G	0.05	2.16	0.000111362	0.054	1.315	0.403867	0.051	1.89	0.0002895	RBFOX1
rs6501156	Imp	16	8591273	A	T	0.793	1.73	0.00064781	0.78	0.74	0.181169	0.789	1.22	0.04681	RBFOX1/TMEM114
rs11647985	Imp	16	8949455	A	T	0.488	1.43	0.000969051	0.484	0.911	0.713724	0.487	1.24	0.01373	CARHSP1
rs4566165	Imp	16	10668919	G	A	0.496	1.39	0.000716008	0.531	0.863	0.365082	0.507	1.17	0.02657	EMP2
rs9922001	Imp	16	12204830	G	C	0.117	1.56	0.000336186	0.118	1.041	0.633648	0.117	1.39	0.001427	SNX29
rs62039997	Imp	16	12473680	A	C	0.071	1.84	0.000387944	0.067	1.798	0.0123824	0.07	1.83	1.419e-05	SNX29
rs9928897	Geno	16	13605058	T	C	0.06	1.8	0.000685521	0.073	0.838	0.291459	0.064	1.47	0.03233	SHISA9/ERCC4
rs8053952	Imp	16	17761563	T	A	0.347	0.68	0.00072018	0.344	0.996	0.842828	0.346	0.78	0.00855	XYLT1/NPIPA8
rs2369431	Imp	16	23290420	C	T	0.342	0.66	0.000197115	0.351	1.233	0.237828	0.345	0.83	0.01966	SCNN1B
rs59177375	Imp	16	26514739	T	G	0.074	1.9	6.26035e-05	0.077	1.09	0.422865	0.075	1.62	0.0002012	HS3ST4/C16orf82
rs9936530	Imp	16	26648729	C	G	0.066	1.75	0.000447049	0.063	1.409	0.209518	0.065	1.65	0.0003401	HS3ST4/C16orf82
rs8059015	Imp	16	51288266	C	T	0.219	1.42	0.000532149	0.236	1.093	0.516501	0.224	1.3	0.001418	SALL1/C16orf97
rs11864231	Geno	16	57111232	T	C	0.226	1.41	0.000266796	0.229	0.916	0.671089	0.227	1.24	0.006698	NLRC5
rs72775186	Imp	16	57114612	A	G	0.05	2.18	3.95243e-06	0.06	0.94	0.675667	0.053	1.77	0.0004631	NLRC5
rs8044658	Imp	16	59179855	C	T	0.91	0.61	0.000652644	0.904	0.869	0.41036	0.908	0.67	0.001162	GOT2/CDH8
rs11640092	Imp	16	60489306	A	G	0.201	1.54	8.60062e-05	0.223	1.093	0.356107	0.208	1.38	0.0001939	GOT2/CDH8
rs55663946	Imp	16	61141075	T	G	0.121	1.65	0.000216869	0.126	0.918	0.954343	0.123	1.39	0.002987	GOT2/CDH8
rs62041610	Imp	16	64462742	A	G	0.092	0.39	0.000599224	0.084	0.945	0.765016	0.09	0.6	0.00307	CDH8/CDH11
rs3813743	Imp	16	71523051	G	A	0.708	0.67	8.02009e-05	0.697	0.97	0.883135	0.705	0.75	0.001835	ZNF19
rs7200865	Imp	16	78389752	T	C	0.708	0.68	0.000477327	0.689	0.948	0.626691	0.702	0.75	0.00181	WWOX
rs2550683	Geno	16	79085534	G	T	0.667	0.73	0.000845655	0.689	0.974	0.466002	0.674	0.8	0.001719	WWOX
rs11150401	Imp	16	81745554	A	G	0.927	0.55	0.000349462	0.921	1.224	0.735854	0.925	0.65	0.006817	CMIP/PLCG2
rs4392062	Imp	16	81763386	C	A	0.128	1.76	6.24731e-05	0.135	1.273	0.365905	0.13	1.59	0.0001582	CMIP/PLCG2
rs2175247	Imp	16	84042082	A	G	0.109	0.51	0.000835338	0.108	0.709	0.190935	0.109	0.58	0.0005094	NECAB2/SLC38A8
rs8049209	Imp	16	84130286	G	C	0.058	1.76	0.000587928	0.062	0.975	0.867362	0.059	1.51	0.007087	MBTPS1
rs12925471	Imp	16	88593721	A	G	0.112	1.64	0.000203628	0.117	1.156	0.313818	0.114	1.48	0.0003139	ZFPM1
rs3096311	Imp	16	89370677	G	C	0.746	0.73	0.00050752	0.743	1.027	0.607674	0.745	0.8	0.01165	ANKRD11
rs74933260	Imp	17	234953	T	A	0.058	1.85	7.21909e-05	0.055	0.481	0.172818	0.057	1.52	0.01527	RPH3AL
rs28613269	Imp	17	1137258	T	G	0.304	0.67	0.000622621	0.285	0.719	0.0809851	0.298	0.69	0.0001467	ABR/BHLHA9
rs2642158	Imp	17	7630301	G	C	0.36	1.54	7.94101e-05	0.37	0.986	0.837825	0.363	1.33	0.0008904	DNAH2
rs80283923	Imp	17	8067755	T	C	0.052	1.83	0.00094419	0.051	1.409	0.210606	0.051	1.7	0.000637	VAMP2/TMEM107
rs11651183	Imp	17	11256800	A	G	0.214	1.43	0.000371292	0.207	1.131	0.575751	0.211	1.33	0.001297	SHISA6
rs34768592	Imp	17	19623232	C	T	0.112	0.4	0.000381463	0.107	0.63	0.184613	0.11	0.47	0.0002535	SLC47A2/ALDH3A1
rs9910730	Imp	17	32529375	C	G	0.604	1.46	0.000519625	0.625	0.906	0.525892	0.611	1.23	0.01441	ASIC2/CCL2
rs11657660	Imp	17	35738755	C	T	0.124	0.45	0.000324991	0.13	1.366	0.222166	0.126	0.77	0.02744	ACACA/C17orf78
rs11263755	Geno	17	36045521	G	A	0.184	1.5	0.000747347	0.169	0.713	0.636391	0.179	1.23	0.01385	DDX52/HNF1B
rs3785464	Imp	17	37052801	A	C	0.115	1.56	0.000494838	0.134	1.09	0.522309	0.121	1.39	0.001367	LASP1
rs9903959	Geno	17	48501657	A	G	0.514	1.45	0.0006011	0.523	1.076	0.580283	0.517	1.31	0.001882	LRRC59/ACSF2
rs2290861	Geno	17	48557348	C	T	0.582	1.46	0.000846089	0.599	0.916	0.471289	0.587	1.24	0.02211	RSAD1
rs4793810	Imp	17	54402275	C	A	0.505	1.4	0.000560716	0.523	0.936	0.787531	0.511	1.23	0.008211	ANKFN1
rs12945949	Imp	17	55522384	C	A	0.138	0.53	0.000939703	0.141	1.087	0.893837	0.139	0.74	0.00912	MSI2
rs10132	Imp	17	56168371	A	G	0.778	1.72	7.31731e-06	0.788	0.991	0.656405	0.781	1.4	0.0007234	DYNLL2
rs17683292	Geno	17	60789232	C	T	0.323	0.69	0.000785083	0.316	0.755	0.198001	0.321	0.71	0.0005057	MARCH10
rs9896362	Imp	17	63513963	G	A	0.907	0.58	0.000187681	0.91	0.956	0.692326	0.908	0.65	0.005094	RGS9/AXIN2
rs72859901	Imp	17	68941583	T	A	0.067	1.95	0.000140651	0.058	1.37	0.342576	0.064	1.77	0.0002676	KCNJ2/CASC17
rs7406216	Imp	17	72007631	A	G	0.812	0.61	0.000457627	0.803	1.183	0.980213	0.809	0.74	0.004649	SDK2/RPL38
rs74826202	Imp	17	72043533	A	G	0.098	1.65	0.000244239	0.094	1.345	0.181566	0.097	1.55	0.0001713	SDK2/RPL38
rs12449574	Imp	17	76463910	A	G	0.692	1.5	0.000787741	0.682	1.189	0.327103	0.689	1.37	0.0009755	DNAH17
rs9891087	Imp	17	80649420	A	G	0.052	2.51	2.8032e-06	0.052	1.337	0.424968	0.052	2.13	1.964e-05	RAB40B
rs68113530	Imp	17	80845009	C	G	0.098	1.88	0.000419981	0.103	1.219	0.540511	0.1	1.64	0.001278	TBCD
rs28445077	Imp	18	2055194	T	A	0.416	0.67	0.000942618	0.399	1.141	0.397167	0.41	0.81	0.0285	ADCYAP1/METTL4
rs524140	Imp	18	2164380	C	A	0.936	0.49	0.000155467	0.935	1.461	0.217413	0.936	0.63	0.01877	ADCYAP1/METTL4
rs9675991	Imp	18	4809383	C	G	0.319	1.38	0.000997387	0.326	1.068	0.412206	0.321	1.27	0.001629	DLGAP1/C18orf42
rs1990560	Imp	18	10165289	G	T	0.506	0.69	0.000258343	0.504	0.985	0.929237	0.505	0.77	0.002544	VAPA/APCDD1
rs11662730	Imp	18	13790877	G	C	0.874	0.52	1.25416e-05	0.873	0.732	0.154086	0.874	0.58	1.197e-05	RNMT/MC5R
rs76490994	Imp	18	13839652	G	C	0.059	1.87	6.43556e-05	0.063	0.991	0.664981	0.061	1.61	0.002778	MC5R/MC2R
rs1652362	Geno	18	21176770	C	T	0.082	0.45	0.000948474	0.078	1.303	0.204368	0.081	0.77	0.05211	NPC1/ANKRD29
rs3110688	Imp	18	27970175	G	T	0.664	0.66	6.56064e-05	0.645	1.188	0.506579	0.658	0.8	0.004336	CDH2/DSC3
rs72960024	Imp	18	31205209	A	G	0.201	1.53	0.000675647	0.186	1.498	0.074401	0.196	1.52	0.0001439	ASXL3
rs12957418	Imp	18	32589264	G	C	0.179	1.49	0.000253836	0.189	1.23	0.494948	0.182	1.41	0.0007561	MAPRE2
rs7507002	Imp	18	36061389	T	C	0.058	1.99	0.00034823	0.073	0.925	0.544882	0.063	1.61	0.001126	CELF4
rs4500815	Imp	18	46332908	G	A	0.758	0.66	0.000654002	0.755	1.366	0.133531	0.757	0.81	0.05867	CTIF
rs4939828	Imp	18	46457174	C	T	0.247	1.54	0.000288633	0.23	0.746	0.168891	0.242	1.27	0.03238	SMAD7
rs79039291	Imp	18	55874159	A	G	0.069	2.14	0.000183843	0.063	0.712	0.459988	0.067	1.7	0.00919	NEDD4L
rs9953099	Imp	18	58522114	G	T	0.067	1.86	0.000240765	0.069	0.776	0.56054	0.067	1.53	0.008267	MC4R/CDH20
rs12964116	Geno	18	61442619	G	A	0.05	2.42	1.19243e-06	0.051	1.435	0.349756	0.05	2.11	7.161e-06	SERPINB7
rs1243064	Imp	18	61513975	A	T	0.259	1.49	4.58661e-05	0.253	1.074	0.384418	0.257	1.34	0.0001353	SERPINB7/SERPINB2
rs557512	Imp	18	62893102	G	A	0.61	0.73	0.000688159	0.626	1.088	0.371898	0.615	0.83	0.02548	SERPINB8/CDH7
rs73529419	Imp	18	63190772	A	G	0.208	0.65	0.000602172	0.192	0.849	0.47433	0.203	0.71	0.001361	SERPINB8/CDH7
rs8091833	Imp	18	69957377	G	A	0.682	1.55	0.000397199	0.7	1.17	0.120513	0.687	1.4	0.0001556	GTSCR1/CBLN2
rs7240390	Imp	18	71093514	A	T	0.112	1.57	0.000254365	0.112	1.333	0.269196	0.112	1.49	0.0003008	RP11-169F17.1/FBXO15
rs7237624	Imp	18	74261446	G	A	0.866	0.61	0.000166031	0.859	1.28	0.267184	0.864	0.74	0.01599	ZNF516/ZNF236
rs470505	Imp	18	74711368	T	G	0.092	1.73	0.000247297	0.112	1.118	0.311989	0.098	1.5	0.0003629	MBP
rs9967166	Imp	18	76361149	G	C	0.194	1.59	0.000232624	0.204	0.768	0.226066	0.197	1.3	0.02254	GALR1/SALL3
rs4807387	Imp	19	997821	C	T	0.83	0.64	0.000167094	0.844	0.875	0.219005	0.835	0.71	0.000161	WDR18/GRIN3B
rs2074916	Imp	19	1127720	A	G	0.23	1.52	7.29717e-05	0.229	1.007	0.89346	0.23	1.34	0.00168	SBNO2
rs4806864	Geno	19	2532725	G	A	0.483	1.4	0.000658613	0.472	1.013	0.813971	0.48	1.26	0.008594	GNG7
rs878493	Imp	19	3546185	A	G	0.123	1.86	0.000860855	0.141	0.674	0.147874	0.129	1.39	0.06284	MFSD12
rs352503	Imp	19	4191623	C	T	0.837	1.77	0.000322248	0.845	0.973	0.83573	0.84	1.39	0.00513	ANKRD24
rs72986530	Imp	19	6630656	A	C	0.158	1.61	1.69402e-05	0.17	0.937	0.732768	0.162	1.38	0.0009918	CD70/TNFSF14
rs7255262	Imp	19	6872981	C	T	0.09	1.8	0.000175465	0.087	1.313	0.178696	0.089	1.64	0.0001276	VAV1/EMR1
rs2438556	Imp	19	12352086	G	T	0.275	1.45	0.000612128	0.278	1.206	0.138853	0.276	1.37	0.0002667	ZNF44
rs6511917	Imp	19	14340117	C	T	0.874	0.55	0.000366401	0.878	0.831	0.708076	0.875	0.61	0.001863	LPHN1/CD97
rs73007799	Imp	19	15982339	C	T	0.065	2.09	9.84764e-06	0.063	1.203	0.563732	0.064	1.83	8.649e-05	UCA1/CYP4F2
rs10416583	Geno	19	16123133	C	T	0.233	1.61	2.9166e-05	0.232	0.912	0.782608	0.233	1.37	0.001229	OR10H4/TPM4
rs4808260	Imp	19	20846271	G	C	0.76	1.66	3.80655e-05	0.767	1.03	0.595259	0.762	1.39	0.002417	ZNF626/ZNF66
rs140457315	Imp	19	21728544	A	C	0.057	2.24	8.11968e-05	0.053	1.051	0.769518	0.055	1.9	0.002461	ZNF429
rs2190801	Geno	19	28451369	T	C	0.563	0.66	5.35526e-05	0.554	0.923	0.794768	0.56	0.74	0.0006009	UQCRFS1
rs16974961	Geno	19	41600054	T	G	0.075	2.03	3.8869e-06	0.064	1.146	0.322551	0.071	1.77	1.518e-05	CYP2A13
rs111500977	Imp	19	44977686	C	T	0.055	1.94	0.000185991	0.06	1.423	0.185534	0.056	1.76	0.0001406	ZNF229/ZNF180
rs17304898	Geno	19	48292018	C	T	0.051	2.01	0.000596943	0.054	0.843	0.56604	0.052	1.63	0.01421	SEPW1/TPRX1
rs75310023	Imp	19	52195270	T	C	0.058	1.97	0.000185702	0.068	0.794	0.490372	0.061	1.56	0.0085	SIGLEC14/HAS1
rs10403116	Imp	19	52236727	A	G	0.079	1.88	8.94584e-05	0.082	0.952	0.356783	0.08	1.6	0.008238	HAS1/FPR1
rs2438043	Imp	19	54538007	G	A	0.878	0.65	0.000980569	0.862	0.92	0.771969	0.873	0.72	0.004442	CACNG6/VSTM1
rs6047591	Geno	20	2223481	G	A	0.449	1.42	0.000358517	0.474	0.989	0.900299	0.457	1.26	0.004742	STK35/TGM3
rs3810561	Imp	20	3211064	C	A	0.707	0.68	0.000498723	0.718	0.796	0.419999	0.71	0.72	0.0009768	SLC4A11
rs404678	Geno	20	5024237	T	C	0.615	1.44	0.000895378	0.638	1.242	0.256971	0.622	1.37	0.0007842	SLC23A2/TMEM230
rs55673215	Imp	20	5145995	G	C	0.055	2.37	2.67204e-06	0.068	1.519	0.277149	0.059	2.06	8.764e-06	CDS2
rs4574172	Imp	20	10372461	A	G	0.461	0.67	0.000277591	0.471	0.994	0.688083	0.464	0.77	0.001444	SNAP25/MKKS
rs6078033	Imp	20	11044166	A	C	0.263	1.43	0.000835308	0.246	1.068	0.38475	0.258	1.31	0.001284	C20orf187/BTBD3
rs2269010	Imp	20	17415418	C	T	0.789	0.64	0.000112833	0.786	1.191	0.229237	0.788	0.76	0.015	PCSK2
rs17664036	Geno	20	21220212	C	T	0.059	2.02	4.46004e-05	0.062	2.227	0.000343365	0.06	2.09	6.497e-08	PLK1S1
rs6087397	Imp	20	31180783	T	C	0.077	1.87	0.000480203	0.081	1.279	0.312295	0.078	1.66	0.000616	C20orf112/C20orf203
rs6072152	Imp	20	39431097	C	T	0.15	0.56	0.000969817	0.133	1.261	0.496466	0.145	0.77	0.02254	MAFB/TOP1
rs10485680	Imp	20	40355087	G	A	0.064	1.94	0.00016671	0.064	1.318	0.486081	0.064	1.74	0.0005342	CHD6/PTPRT
rs142790533	Imp	20	42117790	T	C	0.052	1.91	0.000792792	0.047	0.774	0.48282	0.05	1.59	0.02066	SRSF6/L3MBTL1
rs7272535	Imp	20	44159889	A	G	0.088	0.53	0.000876221	0.095	0.803	0.496562	0.09	0.63	0.001946	SPINT3/WFDC6
rs1889172	Imp	20	46330955	A	C	0.535	1.46	0.000112977	0.55	1.049	0.870198	0.54	1.31	0.001239	SULF2
rs331614	Imp	20	55637731	G	C	0.554	0.75	0.000707066	0.538	1.008	0.683719	0.549	0.82	0.01202	TFAP2C/BMP7
rs328491	Imp	20	55969492	T	C	0.618	0.69	0.00017373	0.615	0.879	0.411453	0.617	0.75	0.0004196	RBM38
rs6123831	Imp	20	57373859	T	C	0.427	1.43	0.0005768	0.42	1.035	0.456922	0.425	1.28	0.001243	NPEPL1/GNAS
rs150021548	Imp	20	60666164	A	G	0.065	2.1	0.000195557	0.059	0.856	0.567054	0.063	1.76	0.007157	TAF4/LSM14B
rs6011776	Imp	20	61983756	T	C	0.882	0.62	0.000176329	0.89	0.906	0.862719	0.885	0.7	0.003241	CHRNA4
rs61541144	Imp	20	62527305	A	G	0.082	1.79	5.13188e-05	0.084	0.967	0.959178	0.082	1.52	0.001124	DNAJC5
rs9978165	Imp	21	17042573	G	A	0.133	1.64	0.000437271	0.137	1.033	0.604759	0.134	1.43	0.001594	NRIP1/USP25
rs2827275	Imp	21	23572795	C	G	0.385	0.71	0.000810348	0.372	1.443	0.0211256	0.381	0.91	0.1699	NCAM2/7SK
rs4817449	Geno	21	33437431	T	C	0.667	1.7	6.66397e-05	0.668	0.914	0.79441	0.667	1.36	0.002034	HUNK/MIS18A
rs113893931	Imp	21	35103158	A	G	0.253	1.53	0.000114062	0.274	1.356	0.174135	0.26	1.47	8.638e-05	ITSN1
rs2834478	Geno	21	35782033	T	G	0.341	0.66	0.000197502	0.34	1.072	0.437557	0.341	0.78	0.01022	C21orf140/KCNE1
rs71316685	Imp	21	40989064	C	G	0.056	1.88	0.00024289	0.057	1.066	0.988035	0.057	1.61	0.00281	B3GALT5
rs2837463	Imp	21	41527250	T	C	0.285	1.46	0.000316798	0.289	0.953	0.93126	0.286	1.28	0.004065	DSCAM
rs116954548	Imp	21	43179525	C	T	0.067	0.43	0.00082354	0.077	1.131	0.856256	0.07	0.72	0.009067	RIPK4
rs8130194	Imp	21	46125449	G	A	0.051	1.93	0.000763415	0.056	1.174	0.935573	0.053	1.66	0.005444	TSPEAR
rs73232740	Imp	21	47155543	A	G	0.058	2.15	0.000458097	0.047	0.567	0.105028	0.054	1.76	0.05768	PCBP3
rs2839269	Imp	21	47891491	G	A	0.281	0.66	0.000743935	0.294	1.102	0.627952	0.285	0.81	0.01408	DIP2A
rs4822582	Imp	22	25629434	C	G	0.788	0.62	0.000804318	0.783	0.849	0.471787	0.787	0.69	0.001685	CRYBB2/LRP5L
rs2342945	Geno	22	27855335	A	C	0.612	0.65	1.03369e-05	0.588	0.821	0.433433	0.605	0.7	5.403e-05	MIAT/MN1
rs55970456	Imp	22	27891410	A	G	0.172	0.51	5.9076e-05	0.173	0.612	0.0217815	0.172	0.54	4.221e-06	MIAT/MN1
rs35143518	Imp	22	31842090	T	C	0.429	0.71	0.000832051	0.434	0.951	0.670039	0.43	0.78	0.003059	DRG1/EIF4ENIF1
rs35060739	Imp	22	35408894	A	G	0.074	1.88	0.000466472	0.074	1.412	0.262323	0.074	1.74	0.0004736	LARGE-IT1/ISX
rs710183	Geno	22	37450760	G	T	0.892	0.6	0.000933135	0.89	0.802	0.429262	0.892	0.65	0.001641	KCTD17
rs2743819	Imp	22	37476193	G	A	0.699	1.6	8.15512e-05	0.703	1.041	0.792596	0.701	1.37	0.0008027	TMPRSS6
rs470026	Imp	22	44465304	T	A	0.794	0.66	0.000548504	0.794	0.818	0.308938	0.794	0.71	0.0006748	PARVB
rs5764992	Imp	22	45160232	C	G	0.221	1.57	0.000616598	0.219	1.325	0.101445	0.22	1.49	0.0001868	PRR5-ARHGAP8/ARHGAP8
rs142352234	Imp	22	46571406	G	C	0.05	1.94	0.000976003	0.047	0.674	0.504105	0.049	1.6	0.02221	PPARA
rs4425	Imp	22	47298985	C	T	0.857	1.86	0.000991097	0.862	1.063	0.776543	0.859	1.49	0.004525	TBC1D22A
rs34548871	Imp	22	48638660	T	C	0.134	1.66	1.79073e-05	0.143	0.885	0.629769	0.137	1.39	0.001371	TBC1D22A/FAM19A5
rs1981477	Imp	22	49524428	A	G	0.068	2.02	0.000639037	0.061	1.147	0.718414	0.066	1.77	0.00286	FAM19A5/C22orf34
GOFA, Genetics of Food Allergy study; EA, effect allele; AA, alternative allele; AF, effect allele frequency; OR, odds ratio.
a Genomic positions were based on human genome reference assembly GRCh37.p13.

## Sheet: SupplementaryData1d
Supplementary Data 1d Top associated loci (P < 1 x 10-3 in the discovery set) for cow's milk allergy
Cow's milk allergy						GOFA discovery set			GOFA replication set			Meta-analysis
SNP ID	Status	Chr	Positiona	EA	AA	AF	OR	P value	AF	OR	P value	AF	OR	P value	Gene region
rs3118505	Geno	1	1472047	T	C	0.07	1.98	0.00056248	0.07	0.916	0.647316	0.07	1.64	0.01234	TMEM240
rs4648376	Imp	1	3209631	A	G	0.516	0.69	0.000793571	0.512	0.821	0.206617	0.514	0.73	0.0005629	PRDM16
rs61762129	Imp	1	6021704	C	T	0.14	1.72	0.000436265	0.15	1.122	0.47531	0.143	1.51	0.001142	NPHP4
rs3789566	Imp	1	6102601	T	C	0.387	0.67	0.000471553	0.391	0.827	0.534412	0.388	0.72	0.001466	KCNAB2
rs2020902	Geno	1	15834360	G	A	0.152	0.56	0.000786856	0.15	1.127	0.263485	0.152	0.77	0.04177	CASP9
rs113734202	Imp	1	17355896	T	G	0.055	0.18	0.000233278	0.053	0.859	0.604519	0.054	0.48	0.001085	SDHB
rs2946528	Imp	1	18770213	T	C	0.305	0.61	0.000556646	0.294	1.188	0.518759	0.302	0.79	0.01672	IGSF21/KLHDC7A
rs149932	Imp	1	29243760	G	C	0.172	1.69	6.47324e-05	0.175	0.955	0.38484	0.173	1.43	0.0001919	EPB41
rs75297032	Imp	1	29581560	A	G	0.055	2.33	2.1184e-05	0.059	0.786	0.951363	0.057	1.79	0.0007154	PTPRU
rs35709624	Imp	1	38195373	A	G	0.083	1.79	0.000328902	0.072	1.246	0.122135	0.08	1.61	0.0001406	EPHA10
rs34110660	Imp	1	38205970	C	T	0.193	1.42	0.000765201	0.185	1.138	0.556094	0.191	1.33	0.002241	EPHA10
rs72661510	Imp	1	41277549	G	C	0.122	0.42	0.000539316	0.125	0.782	0.361465	0.123	0.56	0.0008827	KCNQ4
rs148218398	Imp	1	41288105	C	G	0.075	2.08	0.000120543	0.079	0.872	0.91265	0.076	1.66	0.002467	KCNQ4
rs2457077	Imp	1	48061318	C	T	0.954	0.53	0.000568927	0.957	2.037	0.562041	0.955	0.66	0.01522	FOXD2/TRABD2B
rs6676392	Imp	1	48524250	G	A	0.06	1.97	0.000928953	0.066	0.348	0.140445	0.062	1.5	0.07391	TRABD2B/SLC5A9
rs2274663	Imp	1	54704563	A	G	0.191	1.72	9.23793e-05	0.187	1.111	0.810991	0.19	1.5	0.001014	SSBP3
rs4926670	Imp	1	55662680	T	C	0.088	1.91	0.000216459	0.094	0.825	0.876722	0.09	1.58	0.003941	USP24
rs1213649	Imp	1	58808802	C	A	0.11	1.62	0.000174312	0.113	0.959	0.72941	0.111	1.42	0.004902	DAB1
rs4912333	Imp	1	58819510	G	A	0.473	0.67	0.000390215	0.467	0.791	0.247988	0.471	0.71	0.0004016	DAB1
rs12729555	Imp	1	62285269	T	C	0.084	1.83	0.000168416	0.076	1.288	0.69431	0.081	1.66	0.001116	INADL
rs12402069	Imp	1	65178474	C	T	0.075	1.97	1.67347e-05	0.089	0.765	0.174214	0.079	1.59	0.007939	CACHD1/RAVER2
rs116306781	Imp	1	68554627	A	G	0.073	2.12	0.000282482	0.08	0.652	0.387792	0.075	1.64	0.01608	DIRAS3/WLS
rs12730489	Geno	1	68735304	T	C	0.504	0.68	8.83238e-05	0.507	1.262	0.198565	0.505	0.84	0.01688	WLS/RPE65
rs11163496	Imp	1	75960165	T	C	0.175	1.71	7.52937e-05	0.193	1.05	0.904402	0.181	1.47	0.001132	SLC44A5
rs2647524	Imp	1	77906437	G	T	0.866	0.58	0.000412095	0.851	1.18	0.411087	0.861	0.72	0.01865	AK5
rs3766346	Imp	1	78981279	A	G	0.247	1.59	0.000127556	0.255	0.719	0.173216	0.249	1.28	0.02309	PTGFR
rs302813	Imp	1	99568887	C	G	0.713	0.68	0.000519766	0.714	0.855	0.483106	0.713	0.73	0.001337	LPPR5/LPPR4
rs6660498	Geno	1	99682616	G	A	0.216	1.72	7.94958e-05	0.212	1.111	0.946042	0.215	1.51	0.00131	LPPR5/LPPR4
rs10875329	Imp	1	101210608	C	G	0.946	0.48	0.00072608	0.943	1.184	0.707965	0.945	0.6	0.003274	VCAM1/EXTL2
rs12026998	Imp	1	102229779	A	C	0.072	0.23	9.90062e-05	0.065	1.743	0.132369	0.07	0.82	0.02529	S1PR1/OLFM3
rs10785820	Imp	1	107845315	A	T	0.396	0.63	0.000139948	0.4	0.862	0.42316	0.397	0.7	0.0004018	NTNG1
rs11185088	Imp	1	107865812	A	T	0.685	0.68	0.000908786	0.692	0.736	0.045234	0.687	0.69	0.0001143	NTNG1
rs17026160	Imp	1	111133168	C	G	0.054	1.81	0.000839532	0.053	0.925	0.690853	0.054	1.54	0.003476	KCNA10/KCNA2
rs61805972	Imp	1	111225411	A	G	0.071	1.78	0.00086623	0.058	0.976	0.372257	0.067	1.58	0.03166	KCNA3/CD53
rs1146294	Imp	1	117831200	G	A	0.52	0.68	0.000701033	0.515	0.874	0.470049	0.519	0.74	0.001604	VTCN1/MAN1A2
rs10923265	Imp	1	117839201	A	G	0.096	0.43	0.000931763	0.087	0.805	0.542898	0.093	0.56	0.002494	VTCN1/MAN1A2
rs17023386	Geno	1	119836143	C	T	0.066	1.88	0.000244205	0.075	0.942	0.892824	0.069	1.55	0.004101	WARS2-IT1/HAO2
rs12123821	Imp	1	152179152	T	C	0.058	3.59	2.42001e-09	0.06	3.239	0.000410082	0.058	3.49	5.246e-12	RPTN/HRNR
rs3014860	Imp	1	153314782	A	G	0.952	0.4	9.05602e-05	0.946	0.876	0.757208	0.95	0.48	0.0008617	PGLYRP4
rs67421773	Imp	1	157331042	A	G	0.091	1.74	0.000353008	0.1	0.728	0.489268	0.094	1.41	0.01379	ETV3/FCRL5
rs113561489	Imp	1	158907594	A	G	0.076	2.15	0.000752494	0.08	1.273	0.507137	0.077	1.86	0.001907	PYHIN1
rs9887904	Geno	1	158978596	A	C	0.129	1.58	0.000225347	0.13	1.246	0.475843	0.13	1.48	0.0006976	IFI16
rs11811187	Imp	1	164355298	T	C	0.083	1.77	0.000871635	0.093	1.411	0.307172	0.086	1.65	0.001022	NUF2/PBX1
rs4657544	Imp	1	166369662	A	G	0.199	1.78	6.14186e-05	0.196	0.85	0.617594	0.198	1.47	0.00343	FAM78B/POGK
rs10489372	Imp	1	168933468	T	G	0.426	0.67	0.000722658	0.432	1.443	0.0120678	0.428	0.88	0.2196	DPT/ATP1B1
rs12024275	Imp	1	170643365	A	G	0.197	0.55	0.000251878	0.207	0.728	0.0866634	0.2	0.61	7.43e-05	PRRX1
rs6427276	Imp	1	170907348	A	G	0.427	1.49	0.000197376	0.443	1.254	0.207291	0.432	1.4	0.0001817	MROH9
rs112362558	Imp	1	180359815	A	G	0.175	1.63	0.000734822	0.185	0.734	0.248171	0.178	1.3	0.04243	ACBD6
rs61807494	Imp	1	182763080	A	G	0.388	1.5	0.00092314	0.41	0.82	0.520747	0.395	1.23	0.02243	NPL
rs6701227	Geno	1	184595020	G	A	0.112	1.67	0.000301658	0.11	0.842	0.548658	0.111	1.4	0.01077	C1orf21
rs61831302	Imp	1	186064858	C	A	0.201	1.57	0.000186736	0.196	1.247	0.530165	0.199	1.45	0.0007298	HMCN1
rs12034981	Imp	1	204069237	A	C	0.152	1.59	0.000301384	0.133	1.105	0.885345	0.146	1.45	0.002767	SOX13
rs16853773	Imp	1	204436066	A	G	0.199	1.75	7.45337e-06	0.187	0.95	0.820929	0.195	1.46	0.0005225	PIK3C2B
rs12128144	Imp	1	208208034	C	G	0.446	1.54	0.000133613	0.42	1.235	0.339038	0.438	1.43	0.0002723	PLXNA2
rs4951683	Imp	1	211081227	G	A	0.082	2.04	0.000722054	0.085	1.304	0.241808	0.083	1.76	0.0006381	KCNH1
rs12734595	Imp	1	214343707	C	A	0.235	1.57	0.000695251	0.247	0.824	0.407138	0.239	1.3	0.02541	PROX1/SMYD2
rs12562202	Geno	1	217102472	G	A	0.229	1.57	0.000680972	0.249	1.205	0.185463	0.235	1.43	0.000433	ESRRG
rs11118325	Imp	1	219685466	T	C	0.321	1.5	0.000700236	0.326	1.087	0.640421	0.322	1.35	0.002667	LYPLAL1/SLC30A10
rs80169078	Imp	1	219705515	G	A	0.09	1.83	0.000682883	0.077	1.338	0.136801	0.086	1.66	0.0002995	LYPLAL1/SLC30A10
rs12125690	Geno	1	222010866	G	A	0.206	0.54	0.000662791	0.2	0.94	0.889754	0.204	0.68	0.004793	DUSP10/HHIPL2
rs35334529	Imp	1	222104306	T	C	0.089	2.04	6.48e-05	0.085	0.995	0.800243	0.088	1.73	0.002195	DUSP10/HHIPL2
rs780226	Geno	1	233668751	T	C	0.22	1.49	0.000644843	0.214	1.291	0.388287	0.218	1.42	0.001126	MLK4/KCNK1
rs79210514	Imp	1	233878456	G	T	0.05	0.18	0.000732324	0.045	0.941	0.921639	0.049	0.47	0.005525	KCNK1/SLC35F3
rs114657346	Imp	1	234895130	C	T	0.057	2.41	0.000186375	0.057	0.694	0.468979	0.057	1.83	0.01002	IRF2BP2/TOMM20
rs79605588	Imp	1	237175770	G	A	0.148	1.57	0.000645532	0.148	0.997	0.84448	0.148	1.38	0.004229	MT1HL1/RYR2
rs2090689	Imp	1	242146145	T	A	0.465	1.52	0.000178993	0.473	0.96	0.88464	0.467	1.31	0.003418	EXO1/MAP1LC3C
rs77406868	Imp	1	243520869	A	T	0.052	2.55	3.21343e-05	0.053	1.631	0.19673	0.053	2.24	3.936e-05	SDCCAG8
rs56093131	Imp	1	244806710	T	C	0.082	1.79	0.000944544	0.091	0.812	0.730375	0.085	1.45	0.0141	C1orf101/DESI2
rs12134117	Imp	1	245636410	G	A	0.081	1.8	0.000426676	0.073	0.869	0.963739	0.078	1.54	0.005008	KIF26B
rs71437291	Imp	2	256414	A	G	0.057	1.94	0.000655507	0.069	0.25	0.00597907	0.061	1.42	0.2682	SH3YL1
rs112252992	Imp	2	2020194	G	A	0.053	2.28	0.000106194	0.058	1.018	0.722523	0.055	1.9	0.003656	MYT1L
rs73908987	Imp	2	2595633	A	G	0.099	1.8	5.92944e-05	0.106	2.191	0.0030341	0.101	1.93	6.001e-07	MYT1L/TSSC1
rs9308787	Imp	2	4672031	G	C	0.07	1.68	0.000954489	0.076	0.936	0.969415	0.072	1.45	0.008432	DCDC2C/SOX11
rs11679249	Imp	2	6438257	C	T	0.076	1.95	0.000824608	0.085	1.14	0.862488	0.079	1.67	0.009683	SOX11/CMPK2
rs16866255	Geno	2	7584668	A	G	0.101	1.92	5.46546e-06	0.098	1.098	0.86701	0.1	1.67	0.0003753	RNF144A/ID2
rs10166616	Geno	2	9355318	A	G	0.581	1.52	0.000494389	0.591	1.014	0.642452	0.584	1.32	0.002085	ASAP2
rs72777378	Imp	2	10905591	A	G	0.156	0.34	2.09442e-06	0.17	1.044	0.547273	0.16	0.63	0.0005442	ATP6V1C2
rs1866652	Imp	2	12125767	C	G	0.228	0.63	0.000982301	0.237	0.853	0.867081	0.231	0.71	0.005959	LPIN1/TRIB2
rs11886100	Imp	2	15008308	C	A	0.107	1.7	0.000291641	0.115	0.977	0.810142	0.11	1.45	0.005591	FAM84A/NBAS
rs1518793	Geno	2	15036358	C	T	0.135	1.65	0.000464256	0.147	0.969	0.86504	0.139	1.42	0.006638	FAM84A/NBAS
rs1509396	Imp	2	28612213	C	G	0.552	1.45	0.000416151	0.563	0.825	0.30184	0.556	1.2	0.02606	BRE/FOSL2
rs3100221	Imp	2	29403624	T	G	0.573	0.64	0.000281281	0.578	0.656	0.00459249	0.575	0.64	4.117e-06	CLIP4
rs34976434	Imp	2	30553202	T	C	0.104	2	0.000183112	0.113	1.177	0.4436	0.107	1.71	0.0005316	LBH/LCLAT1
rs12470158	Imp	2	34298078	T	A	0.06	1.88	0.000604803	0.062	0.824	0.706612	0.061	1.55	0.01126	FAM98A/CRIM1
rs11124583	Imp	2	37711341	G	A	0.054	0.29	0.000928321	0.057	0.785	0.498598	0.055	0.49	0.002173	QPCT/CDC42EP3
rs62142629	Imp	2	38868395	G	A	0.066	2.17	0.000147948	0.067	0.939	0.940514	0.066	1.75	0.00196	HNRNPLL/GALM
rs11689051	Imp	2	38896783	T	C	0.113	1.77	0.00023847	0.119	1.333	0.422992	0.115	1.62	0.0006006	GALM
rs72787113	Imp	2	41089000	T	G	0.267	1.53	0.000579958	0.256	1.155	0.237512	0.263	1.4	0.0005217	SLC8A1/C2orf91
rs12713009	Imp	2	48524213	A	T	0.638	1.62	0.000704001	0.652	1.032	0.848292	0.643	1.37	0.009021	FBXO11/FOXN2
rs62140677	Imp	2	51422501	G	A	0.181	1.56	0.000704764	0.193	0.874	0.607124	0.185	1.33	0.01556	NRXN1/SCARNA16
rs4672291	Imp	2	53496090	A	C	0.556	1.51	0.000828754	0.569	1.02	0.983847	0.56	1.32	0.007435	NRXN1/SCARNA16
rs164943	Imp	2	55019869	G	T	0.435	1.52	0.000766141	0.47	0.893	0.525572	0.446	1.27	0.01986	EML6
rs2678910	Imp	2	58112266	T	A	0.602	1.46	0.000809374	0.607	1.011	0.856316	0.604	1.29	0.005085	CCDC85A/VRK2
rs71418413	Imp	2	58182471	A	T	0.052	2.01	0.000679376	0.048	1.263	0.168756	0.051	1.77	0.0003844	VRK2
rs2081736	Imp	2	60842143	G	A	0.175	1.69	0.000498329	0.175	0.855	0.522501	0.175	1.39	0.01551	BCL11A/PAPOLG
rs114841166	Imp	2	61963138	T	C	0.055	1.76	0.000721374	0.062	1.509	0.582265	0.058	1.68	0.002316	XPO1/FAM161A
rs62178041	Imp	2	62761561	C	A	0.128	1.81	2.36732e-05	0.129	1.266	0.195395	0.129	1.63	3.057e-05	TMEM17/EHBP1
rs17032269	Geno	2	66812892	A	G	0.349	0.65	0.00053091	0.348	1.532	0.0301119	0.348	0.89	0.1342	MEIS1/ETAA1
rs59332926	Imp	2	68639631	A	G	0.288	1.75	8.27427e-05	0.288	0.953	0.41428	0.288	1.46	0.007344	PLEK/FBXO48
rs13394018	Imp	2	73372605	T	C	0.277	1.76	1.48872e-06	0.267	1.208	0.364625	0.274	1.56	1.036e-05	RAB11FIP5
rs13409784	Geno	2	73392069	T	G	0.183	0.53	0.00060194	0.197	1.207	0.450754	0.188	0.77	0.02082	RAB11FIP5/NOTO
rs720069	Geno	2	75632086	C	T	0.607	0.66	0.000300914	0.604	1.549	0.0216086	0.606	0.85	0.1231	TACR1/EVA1A
rs1839669	Imp	2	98791433	C	T	0.549	1.66	2.9809e-05	0.572	1.248	0.2028	0.556	1.5	3.877e-05	VWA3B
rs4851601	Imp	2	103116261	A	G	0.296	1.47	0.000299266	0.315	0.671	0.0328068	0.302	1.17	0.101	SLC9A4
rs11885188	Imp	2	105906118	A	C	0.236	1.61	0.000484584	0.244	1.133	0.532605	0.238	1.44	0.001488	TGFBRAP1
rs2203800	Imp	2	106090591	T	C	0.149	1.59	0.000460343	0.155	1.14	0.312264	0.151	1.44	0.0006314	FHL2/NCK2
rs116039049	Imp	2	107279016	A	T	0.082	0.32	0.000813748	0.083	0.845	0.309212	0.082	0.52	0.0009769	RGPD3/ST6GAL2
rs1343666	Imp	2	112986955	G	C	0.698	0.7	0.000975986	0.694	1.244	0.0989156	0.697	0.83	0.09463	ZC3H8
rs78168645	Imp	2	119518227	C	T	0.065	2.38	8.27175e-06	0.064	1.338	0.825567	0.065	2.07	0.000202	INSIG2/EN1
rs76333264	Imp	2	119586195	T	C	0.05	1.96	0.000474232	0.056	1.296	0.479335	0.052	1.75	0.001232	INSIG2/EN1
rs869147	Imp	2	127927732	A	G	0.622	1.57	0.00045167	0.634	1.036	0.775701	0.626	1.35	0.002784	BIN1/CYP27C1
rs13035268	Geno	2	127937551	A	G	0.521	1.43	0.000814158	0.541	0.884	0.923858	0.528	1.21	0.005969	BIN1/CYP27C1
rs9784001	Imp	2	129478625	G	A	0.117	1.64	0.000400503	0.121	0.841	0.362004	0.118	1.38	0.02115	HS6ST1/RAB6C
rs13018111	Imp	2	137515364	T	C	0.548	0.68	0.000904304	0.547	1.224	0.386438	0.548	0.82	0.0312	CXCR4/THSD7B
rs114319901	Imp	2	137760232	A	G	0.069	1.97	0.00081971	0.06	1.002	0.750367	0.066	1.65	0.003974	THSD7B
rs10928203	Geno	2	144632311	G	A	0.234	1.58	0.000733459	0.241	1.061	0.663859	0.237	1.39	0.002938	ARHGAP15/GTDC1
rs77527739	Imp	2	147901284	C	G	0.055	2.3	3.8855e-06	0.056	0.956	0.884744	0.055	1.84	0.0001448	TEX41/ACVR2A
rs12996110	Geno	2	151754978	T	C	0.474	0.63	0.000956216	0.471	0.921	0.407771	0.473	0.72	0.001641	RND3/RBM43
rs1366749	Geno	2	155402812	G	A	0.457	0.67	0.000231148	0.466	1.201	0.466693	0.46	0.83	0.01144	GALNT13/KCNJ3
rs73010931	Imp	2	155431869	C	A	0.146	1.53	8.07378e-05	0.126	0.894	0.721283	0.139	1.35	0.00309	GALNT13/KCNJ3
rs1554798	Imp	2	156835059	C	A	0.532	0.6	3.00313e-05	0.531	0.91	0.32387	0.532	0.69	8.056e-05	KCNJ3/NR4A2
rs12991748	Imp	2	160148532	A	G	0.479	0.69	0.000502327	0.471	1.148	0.4913	0.476	0.82	0.01687	WDSUB1/BAZ2B
rs1823293	Imp	2	168868847	C	T	0.589	1.61	3.81723e-05	0.622	0.909	0.411008	0.6	1.32	0.004747	STK39
rs1356589	Geno	2	171219147	G	A	0.244	1.55	0.000140866	0.244	1.635	0.00837178	0.244	1.58	3.684e-06	MYO3B
rs9941572	Imp	2	171522570	C	T	0.687	0.72	0.000797484	0.688	1.079	0.701146	0.687	0.82	0.01354	MYO3B/SP5
rs10198133	Imp	2	173092081	G	C	0.283	0.66	0.00092089	0.289	0.91	0.5096	0.285	0.74	0.002236	DLX2/ITGA6
rs78434898	Imp	2	174710952	C	T	0.323	0.62	0.000409069	0.329	1.153	0.312043	0.325	0.78	0.02498	CDCA7/SP3
rs1344922	Imp	2	178688534	A	T	0.338	1.51	0.000839895	0.342	1.041	0.339538	0.339	1.35	0.001141	PDE11A
rs3770130	Imp	2	182336437	G	C	0.183	1.73	0.000198928	0.186	1.292	0.270894	0.184	1.58	0.0002658	ITGA4
rs850899	Imp	2	186213494	A	T	0.346	0.62	5.35512e-05	0.333	0.896	0.281541	0.342	0.71	0.0001007	ZNF804A/FSIP2
rs2375066	Imp	2	196054492	T	C	0.851	0.6	0.000189056	0.844	1.199	0.437043	0.849	0.72	0.01106	PCGEM1/SLC39A10
rs58300032	Imp	2	196692056	T	G	0.077	1.98	4.35114e-06	0.092	1.338	0.140505	0.082	1.75	4.862e-06	DNAH7
rs6738494	Imp	2	200697058	C	A	0.829	0.61	0.00093901	0.822	1.404	0.0798955	0.826	0.76	0.1052	FTCDNL1
rs176010	Imp	2	200785035	T	C	0.06	1.73	0.000134983	0.064	0.687	0.110874	0.062	1.46	0.03378	C2orf69
rs3731704	Imp	2	202603147	G	A	0.691	1.64	0.000384144	0.686	1.006	0.987724	0.69	1.35	0.00417	ALS2
rs12472067	Geno	2	202759326	C	T	0.616	0.61	6.59297e-05	0.621	1.249	0.076216	0.618	0.76	0.03109	CDK15
rs849581	Imp	2	206602765	T	C	0.109	1.75	0.000181915	0.12	0.788	0.427961	0.112	1.4	0.01111	NRP2
rs7596783	Imp	2	209035224	A	G	0.083	2.15	1.86758e-06	0.089	0.986	0.77575	0.085	1.76	6.241e-05	C2orf80
rs62181365	Imp	2	216291840	T	C	0.27	1.48	0.000936935	0.271	1.081	0.602748	0.271	1.34	0.002973	FN1
rs6748217	Geno	2	222858354	T	C	0.82	0.59	0.000102699	0.829	1.284	0.574766	0.823	0.71	0.005262	EPHA4/PAX3
rs4674703	Imp	2	223687538	G	A	0.946	0.51	0.000332304	0.946	1.191	0.61724	0.946	0.61	0.009615	MOGAT1/ACSL3
rs2396496	Imp	2	228646867	A	T	0.765	0.68	0.000443771	0.761	1.215	0.709215	0.764	0.81	0.009227	SLC19A3/CCL20
rs2193218	Geno	2	230545220	G	A	0.794	0.63	0.000356295	0.793	1.023	0.731897	0.794	0.74	0.002103	DNER
rs2204511	Imp	2	235503327	G	A	0.308	1.69	5.50574e-06	0.321	1.029	0.979324	0.312	1.45	0.0002729	ARL4C/SH3BP4
rs6723843	Imp	2	235533013	A	G	0.246	0.51	0.000117113	0.243	1.079	0.647389	0.245	0.7	0.004707	ARL4C/SH3BP4
rs75812139	Imp	2	237229647	G	C	0.057	0.14	0.000671577	0.057	0.948	0.5714	0.057	0.5	0.01644	ASB18/IQCA1
rs60501707	Imp	2	237282440	C	T	0.181	0.47	4.03163e-05	0.174	0.773	0.190747	0.179	0.57	4.511e-05	IQCA1
rs7586684	Imp	2	238791066	C	G	0.079	1.59	0.000988395	0.091	0.908	0.97314	0.083	1.33	0.007604	RAMP1
rs13382236	Geno	2	238800874	C	T	0.072	1.79	0.000414158	0.081	0.982	0.489651	0.075	1.5	0.001152	RAMP1
rs4676424	Imp	2	241511119	T	G	0.464	1.59	0.000495006	0.453	1.023	0.601854	0.46	1.37	0.00186	RNPEPL1
rs7569717	Imp	2	242701989	T	C	0.272	0.58	0.000291794	0.268	1.058	0.324635	0.27	0.74	0.0199	D2HGDH
rs2731530	Imp	3	1667679	C	T	0.069	1.83	0.000672595	0.062	1.193	0.968363	0.067	1.65	0.005806	CNTN6/CNTN4
rs2729284	Geno	3	2135638	C	T	0.47	1.45	0.000722248	0.475	0.872	0.824189	0.472	1.23	0.009674	CNTN6/CNTN4
rs13075084	Imp	3	4913076	G	C	0.067	2.12	0.000265314	0.057	0.904	0.650791	0.064	1.81	0.007716	EGOT/BHLHE40
rs6793307	Imp	3	5478372	A	G	0.197	1.58	0.000457836	0.199	0.859	0.602856	0.198	1.32	0.0121	EDEM1/GRM7
rs4686258	Imp	3	8388323	G	A	0.767	1.79	0.00056196	0.768	1.069	0.430607	0.767	1.46	0.02112	GRM7/LMCD1
rs598747	Imp	3	12112010	A	G	0.852	2.02	0.000270204	0.865	1.24	0.569442	0.857	1.65	0.001085	SYN2
rs11714483	Imp	3	12487096	A	C	0.228	1.7	0.000285619	0.224	0.937	0.591524	0.227	1.45	0.009347	PPARG/TSEN2
rs6793996	Imp	3	15592839	A	G	0.477	0.7	0.000636085	0.451	0.897	0.465569	0.468	0.76	0.001468	COLQ/HACL1
rs1454770	Imp	3	16077872	G	C	0.052	2.55	2.10948e-05	0.054	0.999	0.561415	0.053	2.1	0.002101	ANKRD28/GALNT15
rs59047853	Imp	3	18832153	A	G	0.239	0.55	0.000256392	0.241	1.171	0.351298	0.239	0.75	0.01701	SATB1/KCNH8
rs17010719	Imp	3	22114364	C	T	0.051	2.19	0.000124701	0.049	0.404	0.0426433	0.05	1.75	0.05995	ZNF385D
rs76900667	Imp	3	24172873	A	G	0.145	0.51	0.000770117	0.126	0.837	0.664606	0.139	0.62	0.003049	THRB
rs62228396	Imp	3	24821734	T	G	0.091	0.4	0.000374094	0.091	1.56	0.109858	0.091	0.82	0.05596	THRB-IT1/RARB
rs9846314	Imp	3	28943758	A	T	0.474	0.68	0.000688383	0.475	1.32	0.350408	0.475	0.86	0.02963	ZCWPW2/RBMS3
rs9849064	Imp	3	29044288	G	T	0.278	1.44	0.000461585	0.296	0.952	0.501439	0.284	1.26	0.01564	ZCWPW2/RBMS3
rs9810960	Imp	3	32465749	G	A	0.051	2.22	0.000310525	0.051	0.889	0.735786	0.051	1.76	0.006933	CMTM7
rs6763474	Imp	3	33265322	A	G	0.789	1.66	0.000671779	0.787	1.559	0.0197018	0.788	1.63	3.772e-05	SUSD5/FBXL2
rs3934936	Geno	3	38664309	T	C	0.306	1.56	0.000441429	0.304	1.187	0.31984	0.305	1.43	0.0006322	SCN5A
rs112320552	Imp	3	39870291	T	G	0.077	1.73	0.000393357	0.079	1.029	0.732417	0.078	1.5	0.008106	MYRIP
rs339705	Imp	3	42724448	T	C	0.116	1.69	0.00064623	0.118	1.305	0.352343	0.117	1.56	0.0009791	ZBTB47/KLHL40
rs1320155	Imp	3	43204692	T	C	0.774	0.71	0.000670365	0.782	0.873	0.711552	0.777	0.75	0.003122	POMGNT2/SNRK
rs148710154	Imp	3	47208986	C	T	0.37	0.64	0.00049372	0.349	1.075	0.621641	0.363	0.77	0.01211	SETD2/KIF9
rs62260855	Imp	3	48132202	G	T	0.07	2.13	5.85266e-05	0.076	1.819	0.0808246	0.072	2.03	1.958e-05	MAP4/CDC25A
rs62260156	Imp	3	50784776	G	A	0.058	2.06	0.000372377	0.066	2.627	0.00530134	0.061	2.23	6.207e-06	DOCK3
rs55946513	Imp	3	52599792	T	C	0.058	2.16	0.000350337	0.054	0.642	0.25697	0.057	1.7	0.02769	SMIM4/PBRM1
rs4422346	Imp	3	54122064	A	C	0.485	1.67	9.22093e-05	0.487	0.978	0.482591	0.486	1.39	0.006377	SELK/CACNA2D3
rs138773492	Imp	3	61246853	A	G	0.054	2.04	0.000809272	0.048	1.926	0.0197582	0.052	2.01	4.52e-05	NPCDR1/PTPRG
rs115542564	Imp	3	62046547	A	G	0.071	2.07	0.000626945	0.08	1.044	0.736929	0.074	1.69	0.003177	PTPRG
rs73123622	Imp	3	64923768	T	C	0.095	0.27	2.09068e-05	0.098	1.049	0.847937	0.095	0.57	0.0009387	ADAMTS9/MAGI1
rs4515061	Imp	3	67501944	T	C	0.585	0.61	2.65405e-05	0.562	0.917	0.865773	0.577	0.7	0.001043	SUCLG2
rs1388496	Imp	3	68275227	A	T	0.388	0.7	0.000354837	0.373	1.129	0.423695	0.383	0.84	0.01652	FAM19A1
rs6790679	Imp	3	71202753	T	C	0.373	0.65	0.000592608	0.37	1.007	0.989404	0.372	0.77	0.005872	FOXP1
rs73097046	Imp	3	71872965	C	T	0.059	1.96	0.00097837	0.067	0.902	0.687044	0.062	1.61	0.01586	PROK2/RYBP
rs6549591	Imp	3	74440447	T	G	0.182	1.8	9.25607e-06	0.169	1.401	0.103975	0.178	1.67	5.835e-06	CNTN3
rs2324402	Imp	3	75987640	T	C	0.113	2.29	5.4089e-05	0.117	1.139	0.822802	0.114	1.88	0.001846	ROBO2
rs2089447	Imp	3	100873216	A	G	0.638	0.65	0.000144095	0.636	1.004	0.533273	0.637	0.75	0.007212	ABI3BP/IMPG2
rs114752680	Imp	3	103183453	C	T	0.068	0.23	0.000332017	0.065	1.563	0.179722	0.067	0.77	0.03668	ZPLD1/ALCAM
rs116470208	Imp	3	104441678	A	G	0.112	1.7	0.00049356	0.11	0.821	0.371947	0.112	1.41	0.0231	ZPLD1/ALCAM
rs28679522	Imp	3	110929426	G	A	0.629	1.71	0.000483831	0.64	0.882	0.518528	0.632	1.35	0.01539	PVRL3
rs61055421	Imp	3	111376291	G	A	0.13	1.81	0.000153219	0.134	1.144	0.938204	0.131	1.58	0.001995	CD96
rs4687932	Imp	3	117404900	C	T	0.922	0.55	0.000817536	0.927	1.105	0.433567	0.924	0.64	0.02598	LSAMP
rs2700371	Imp	3	123629829	A	G	0.05	2.18	5.64335e-05	0.052	1.041	0.213059	0.05	1.81	6.92e-05	CCDC14
rs62263995	Imp	3	127027594	A	G	0.067	1.93	0.000721952	0.065	1.858	0.0893908	0.066	1.9	0.0001924	C3orf56/TPRA1
rs2971565	Geno	3	130199738	G	A	0.807	0.57	3.81429e-05	0.802	0.987	0.434392	0.806	0.68	0.0001588	COL6A5
rs310005	Imp	3	132045421	T	C	0.646	0.64	0.000670191	0.65	1.201	0.599028	0.647	0.78	0.01538	ACPP
rs1498722	Imp	3	134169643	C	T	0.937	0.55	0.000233842	0.926	0.89	0.77357	0.933	0.63	0.001747	AMOTL2/ANAPC13
rs114908520	Imp	3	135474349	A	C	0.093	1.73	0.000606804	0.104	1.089	0.958637	0.096	1.53	0.005297	KY/PPP2R3A
rs1442637	Imp	3	137301396	G	A	0.257	0.62	0.000781704	0.254	0.85	0.375665	0.256	0.7	0.001246	IL20RB/SOX14
rs9870392	Geno	3	139679506	C	T	0.089	1.89	0.000924588	0.088	0.704	0.280809	0.089	1.5	0.04304	CLSTN2
rs4605505	Geno	3	139840886	A	G	0.138	1.68	0.000862654	0.135	1.222	0.554719	0.137	1.53	0.002439	CLSTN2
rs6769212	Geno	3	142976429	T	C	0.614	0.62	1.99581e-05	0.632	1.047	0.569354	0.62	0.73	0.001985	CHST2/SLC9A9
rs114172620	Imp	3	143222518	A	G	0.071	2.07	5.90179e-05	0.075	1.864	0.00869128	0.073	1.99	1.669e-06	SLC9A9
rs6776940	Imp	3	149087714	C	T	0.858	0.6	0.000757731	0.854	1.679	0.0356091	0.857	0.75	0.1443	TM4SF1
rs12639497	Imp	3	149809872	C	T	0.396	1.49	0.000224118	0.385	1.148	0.747765	0.393	1.37	0.001583	PFN2/TSC22D2
rs6803841	Imp	3	151025290	C	A	0.778	1.76	0.000629888	0.781	0.811	0.240373	0.779	1.28	0.0402	MED12L/GPR87
rs9859007	Imp	3	161927478	T	A	0.333	1.55	0.000647779	0.292	1.012	0.560795	0.32	1.36	0.002009	OTOL1/CT64
rs6803187	Imp	3	170241899	G	A	0.607	0.64	0.000226432	0.599	1.003	0.706861	0.604	0.74	0.001426	CLDN11/SLC7A14
rs433586	Imp	3	171327790	C	T	0.952	0.43	5.71835e-05	0.954	1.652	0.53121	0.953	0.53	0.004177	PLD1
rs11919844	Imp	3	172833410	A	G	0.157	0.53	0.000542998	0.145	1.092	0.799907	0.153	0.72	0.008511	SPATA16
rs73173487	Imp	3	175933454	C	A	0.217	1.52	0.000312518	0.219	1.107	0.463549	0.218	1.38	0.0008536	NAALADL2/TBL1XR1
rs7623074	Imp	3	176018338	T	G	0.727	1.81	0.000130196	0.727	0.927	0.939986	0.727	1.39	0.002425	NAALADL2/TBL1XR1
rs7646600	Imp	3	178984679	C	T	0.16	1.57	0.000992134	0.158	0.888	0.984242	0.159	1.34	0.007813	KCNMB3
rs10936997	Geno	3	178985197	T	C	0.474	0.64	0.000375679	0.49	1.312	0.33243	0.479	0.81	0.02234	KCNMB3/ZNF639
rs4582047	Imp	3	186190920	A	T	0.494	1.47	0.000922055	0.478	1.205	0.464452	0.489	1.37	0.001938	DGKG/CRYGS
rs4613444	Imp	3	187156914	G	T	0.056	1.76	0.000995907	0.062	1.048	0.853163	0.058	1.53	0.01117	RTP4/SST
rs480129	Imp	3	189890860	C	G	0.156	0.36	3.66075e-05	0.156	1.067	0.490335	0.156	0.62	0.003613	LEPREL1/CLDN1
rs9283658	Imp	3	190024265	C	T	0.12	1.76	5.93464e-05	0.132	0.763	0.0914754	0.124	1.43	0.02597	CLDN1
rs6765746	Imp	3	193626772	T	C	0.278	1.62	9.1389e-05	0.261	0.647	0.0351147	0.272	1.26	0.05814	OPA1/HES1
rs77555516	Imp	3	194199475	C	T	0.059	2.91	2.40526e-05	0.066	0.889	0.968463	0.061	2.22	0.0006252	ATP13A3
rs60391957	Imp	3	195762411	T	C	0.16	1.8	2.85807e-05	0.165	0.727	0.106269	0.162	1.44	0.01614	TFRC
rs6804171	Imp	3	195775142	A	G	0.482	1.6	4.2517e-05	0.506	0.864	0.370471	0.49	1.3	0.005779	TFRC
rs6828148	Imp	4	2783688	C	G	0.778	0.63	0.000729436	0.785	0.833	0.611673	0.78	0.69	0.002538	TNIP2/SH3BP2
rs6446632	Geno	4	4355380	C	T	0.76	0.66	0.000178265	0.76	1.268	0.235706	0.76	0.79	0.0209	NSG1
rs7660237	Imp	4	7240754	G	A	0.393	1.62	9.85265e-05	0.397	1.085	0.942488	0.394	1.42	0.001499	SORCS2
rs78477749	Imp	4	13285137	A	G	0.071	1.81	0.000257579	0.07	1.362	0.0265737	0.071	1.69	2.07e-05	HS3ST1/RAB28
rs79824993	Imp	4	14082599	T	C	0.062	2.43	0.000211496	0.074	0.946	0.834121	0.066	1.88	0.001908	BOD1L1/CPEB2
rs17387327	Geno	4	16018244	T	C	0.092	1.94	0.000124085	0.1	1.052	0.957936	0.095	1.65	0.00182	PROM1
rs79184107	Imp	4	16111085	T	C	0.087	0.4	0.000560002	0.101	1.333	0.33158	0.092	0.81	0.02794	PROM1/TAPT1
rs6826491	Imp	4	20819602	C	G	0.05	1.94	0.000175309	0.056	1.243	0.519344	0.052	1.7	0.000672	KCNIP4
rs13101254	Imp	4	23943108	G	A	0.352	0.62	0.000356773	0.377	1.317	0.205075	0.36	0.83	0.03414	PPARGC1A/DHX15
rs12509003	Imp	4	24628744	A	G	0.315	1.65	3.09078e-05	0.32	0.902	0.540863	0.317	1.36	0.00281	DHX15/SOD3
rs79560705	Imp	4	29067760	A	G	0.127	0.49	0.000879654	0.126	0.886	0.762651	0.126	0.65	0.004305	STIM2/PCDH7
rs76354162	Imp	4	37424214	G	A	0.052	2.27	0.000324739	0.053	0.574	0.165088	0.052	1.73	0.0388	KIAA1239
rs9306961	Imp	4	38316563	A	G	0.139	1.63	0.000317637	0.132	1.112	0.77081	0.137	1.47	0.006475	PTTG2/KLF3
rs150247582	Imp	4	40916222	T	C	0.1	1.76	0.000658572	0.1	1.019	0.992296	0.1	1.52	0.006044	APBB2
rs4449447	Imp	4	42545200	G	A	0.203	1.6	0.000445504	0.205	1.565	0.0259237	0.204	1.59	3.356e-05	ATP8A1
rs4629481	Imp	4	61589510	C	T	0.686	0.68	0.000948736	0.686	1.102	0.557215	0.686	0.79	0.02091	LPHN3
rs56896076	Imp	4	77161632	G	C	0.1	1.76	0.000737102	0.106	1.8	0.0127441	0.102	1.78	2.729e-05	FAM47E
rs6817593	Geno	4	77461011	C	T	0.444	1.5	0.000709664	0.43	0.926	0.757797	0.44	1.26	0.01109	SHROOM3
rs1662845	Imp	4	82154282	T	A	0.437	1.54	4.82081e-05	0.451	0.986	0.901843	0.442	1.33	0.001396	PRKG2/RASGEF1B
rs13132046	Imp	4	82643945	A	G	0.476	0.63	0.000358198	0.473	1.1	0.403062	0.475	0.76	0.01761	RASGEF1B
rs17359872	Imp	4	84565796	C	T	0.109	1.68	0.000269758	0.114	0.827	0.420241	0.111	1.41	0.01425	AGPAT9/NKX6-1
rs2725252	Geno	4	89061910	A	C	0.546	1.6	3.75135e-05	0.551	0.91	0.680782	0.548	1.3	0.002133	ABCG2
rs2869974	Imp	4	89937076	T	C	0.194	1.56	0.0001188	0.191	0.796	0.252834	0.193	1.3	0.0157	FAM13A
rs28678108	Imp	4	94990661	G	A	0.45	0.61	0.00016379	0.44	1.122	0.627768	0.447	0.76	0.006081	ATOH1/SMARCAD1
rs265046	Imp	4	96373850	A	G	0.472	0.67	0.000946489	0.474	1.178	0.344853	0.473	0.81	0.03594	UNC5C
rs6532567	Imp	4	96498609	A	C	0.475	1.57	0.000228492	0.474	1.026	0.737999	0.475	1.36	0.001563	UNC5C/PDHA2
rs2851255	Imp	4	100042103	G	C	0.719	0.65	0.000963467	0.72	0.911	0.981537	0.719	0.72	0.007615	ADH5/ADH4
rs795115	Imp	4	105070029	C	T	0.57	1.53	0.000224654	0.58	0.945	0.645304	0.573	1.3	0.007061	TACR3/CXXC4
rs72900303	Imp	4	109113323	C	A	0.091	1.84	0.000412775	0.089	0.864	0.577176	0.09	1.55	0.0121	LEF1/RPL34
rs11735892	Imp	4	113320989	A	G	0.355	0.62	0.0002563	0.344	1.126	0.822706	0.351	0.77	0.004997	ALPK1
rs6853484	Imp	4	114552593	T	C	0.064	1.86	0.00012772	0.06	0.711	0.432126	0.063	1.52	0.008942	CAMK2D
rs66625858	Imp	4	117847679	G	A	0.068	1.97	0.000686049	0.064	0.992	0.891771	0.067	1.66	0.008054	NDST4/TRAM1L1
rs4343749	Imp	4	122485885	A	T	0.681	1.53	0.000759204	0.674	1.004	0.87657	0.678	1.31	0.005102	QRFPR/ANXA5
rs4833241	Geno	4	122933691	C	T	0.426	1.43	0.00048873	0.404	0.92	0.827346	0.419	1.23	0.007477	TRPC3/KIAA1109
rs35608263	Imp	4	125757416	A	G	0.08	2.19	2.71388e-05	0.072	1.082	0.945469	0.078	1.81	0.0006363	ANKRD50/FAT4
rs7691199	Imp	4	126954037	A	G	0.209	0.57	0.00044459	0.216	1.062	0.634499	0.211	0.74	0.001888	FAT4/INTU
rs77047910	Imp	4	139258803	C	T	0.073	2	0.000259304	0.076	1.051	0.898259	0.074	1.69	0.00421	SLC7A11/CCRN4L
rs56156745	Imp	4	139622183	A	G	0.059	2.03	0.000696184	0.063	1.316	0.951992	0.06	1.78	0.005724	SLC7A11/CCRN4L
rs28620521	Imp	4	149752648	C	A	0.061	1.91	0.000200677	0.069	1.002	0.970384	0.063	1.59	0.002591	NR3C2/DCLK2
rs3796561	Imp	4	156685604	G	A	0.053	2.21	4.23525e-05	0.057	0.801	0.852926	0.055	1.75	0.001459	GUCY1B3
rs13105454	Imp	4	162269863	G	A	0.676	1.66	0.000270419	0.649	0.986	0.926609	0.667	1.36	0.002845	RAPGEF2/FSTL5
rs4695749	Imp	4	174834761	T	C	0.068	1.99	0.000698436	0.056	0.654	0.561999	0.064	1.64	0.01721	MORF4/FBXO8
rs56205771	Imp	4	176201289	T	C	0.308	1.5	0.000530995	0.311	0.783	0.165525	0.309	1.24	0.0497	ADAM29/GPM6A
rs72701520	Imp	4	181590113	G	T	0.102	1.82	0.000125124	0.1	1.034	0.910234	0.101	1.56	0.001621	TENM3
rs56115601	Imp	4	186576488	T	A	0.406	0.66	0.000813118	0.409	0.894	0.193361	0.407	0.74	0.0005284	SORBS2
rs75682979	Imp	4	189886769	A	G	0.086	1.9	0.000391178	0.089	1.076	0.957616	0.087	1.62	0.003932	TRIML1/FRG1
rs7691596	Imp	4	190097048	T	A	0.122	1.82	0.000447334	0.135	0.811	0.660782	0.126	1.46	0.01039	TRIML1/FRG1
rs438418	Geno	5	2849436	A	G	0.932	0.49	0.0004943	0.928	0.778	0.442988	0.931	0.56	0.001122	C5orf38/IRX1
rs7732434	Geno	5	3436677	T	G	0.328	0.63	0.000215868	0.319	0.853	0.633112	0.325	0.7	0.001117	C5orf38/IRX1
rs814780	Imp	5	5125432	C	T	0.711	1.78	0.000246247	0.702	0.952	0.94363	0.708	1.38	0.003654	IRX1/ADAMTS16
rs2047322	Geno	5	6818876	A	G	0.386	0.69	0.000590896	0.382	1.178	0.623327	0.385	0.85	0.01346	PAPD7/ADCY2
rs11748686	Imp	5	7229389	C	T	0.371	1.47	0.000561334	0.401	0.887	0.43644	0.381	1.25	0.02077	PAPD7/ADCY2
rs1366624	Geno	5	9948603	T	C	0.428	0.68	0.00061855	0.421	0.73	0.0431858	0.426	0.7	7.658e-05	TAS2R1/FAM173B
rs72737072	Imp	5	10072405	C	A	0.085	1.93	0.000303132	0.082	0.774	0.497707	0.084	1.56	0.01233	TAS2R1/FAM173B
rs835149	Geno	5	14881102	A	G	0.939	0.52	3.75026e-05	0.933	0.645	0.342398	0.937	0.55	0.0001046	ANKH/FBXL7
rs13436389	Imp	5	16876891	T	G	0.053	1.86	0.000909285	0.052	0.974	0.907629	0.053	1.61	0.009349	MYO10
rs437171	Geno	5	18129805	A	G	0.224	1.56	0.00078847	0.216	0.856	0.401767	0.222	1.33	0.02769	BASP1/CDH18
rs11950267	Imp	5	24649047	G	T	0.763	0.62	5.86004e-05	0.75	0.991	0.653587	0.759	0.71	0.0004677	CDH10/CDH9
rs62357269	Imp	5	25670623	A	T	0.291	1.48	0.000412175	0.284	1.125	0.413407	0.289	1.36	0.0008781	CDH10/CDH9
rs4867088	Imp	5	31918985	C	T	0.886	0.62	0.000334449	0.862	0.993	0.488373	0.878	0.71	0.01339	PDZD2
rs73757532	Imp	5	32940845	T	G	0.118	1.79	0.000637605	0.137	0.589	0.180598	0.124	1.38	0.05105	NPR3/TARS
rs17304626	Imp	5	34961583	T	G	0.08	1.92	0.000446695	0.082	0.849	0.67135	0.081	1.55	0.01012	DNAJC21/AGXT2
rs13157952	Imp	5	49928934	G	A	0.068	1.9	0.000727055	0.066	1.696	0.022014	0.067	1.83	4.529e-05	EMB/PARP8
rs12658921	Imp	5	50166858	G	A	0.065	1.83	0.000845653	0.072	1.491	0.218836	0.067	1.71	0.000638	PARP8/ISL1
rs285145	Imp	5	55736140	C	T	0.053	2.21	0.000321406	0.058	0.823	0.708936	0.054	1.73	0.00755	ANKRD55/MAP3K1
rs9291691	Imp	5	59730184	T	A	0.137	1.73	6.68363e-05	0.161	1.219	0.361951	0.145	1.55	0.0001778	PDE4D
rs2455404	Imp	5	60939019	A	G	0.511	0.66	0.000205649	0.527	0.998	0.90872	0.516	0.76	0.002261	C5orf64
rs12522405	Imp	5	61007830	C	T	0.171	1.56	0.000259199	0.183	0.911	0.792241	0.174	1.34	0.00541	C5orf64
rs72756778	Imp	5	62332810	C	T	0.057	1.97	0.000682022	0.047	1.046	0.838063	0.054	1.72	0.004326	LRRC70/HTR1A
rs4145068	Imp	5	65594102	T	A	0.373	1.46	0.000263307	0.373	0.757	0.189172	0.373	1.19	0.0312	SREK1/MAST4
rs2372413	Imp	5	67433913	T	C	0.354	0.62	0.000222932	0.362	0.973	0.767801	0.357	0.73	0.001664	CD180/PIK3R1
rs73119301	Imp	5	68442164	A	G	0.147	1.72	0.00058361	0.147	0.998	0.832406	0.147	1.47	0.008283	SLC30A5/CCNB1
rs62372741	Imp	5	70742824	A	G	0.137	1.67	0.000214849	0.144	1.148	0.790406	0.139	1.49	0.001721	GTF2H2/BDP1
rs3797442	Imp	5	75957854	A	G	0.463	1.47	0.00028273	0.46	1.148	0.205741	0.462	1.35	0.0002407	IQGAP2
rs12515607	Imp	5	76414575	T	C	0.298	1.55	0.000630899	0.305	1.373	0.0973775	0.3	1.49	0.0001884	ZBED3/PDE8B
rs72635633	Imp	5	83317465	T	G	0.212	0.57	0.000303019	0.208	1.079	0.570259	0.211	0.74	0.01022	EDIL3
rs7733743	Imp	5	88956857	T	A	0.175	0.51	0.000515613	0.191	0.656	0.0552266	0.18	0.57	8.42e-05	MEF2C/CETN3
rs73774355	Imp	5	95994167	A	G	0.06	1.9	0.000667722	0.058	1.068	0.465225	0.059	1.64	0.001522	CAST
rs163888	Imp	5	106889936	T	C	0.324	1.49	0.000897357	0.329	1.316	0.152308	0.325	1.43	0.000429	EFNA5
rs770172	Geno	5	107121419	G	A	0.334	0.7	0.000880357	0.314	0.81	0.174257	0.328	0.73	0.0004966	EFNA5/FBXL17
rs7709933	Geno	5	119145275	T	C	0.426	0.67	0.000788094	0.42	1.613	0.00378989	0.424	0.92	0.3273	FAM170A/PRR16
rs4895335	Imp	5	121150249	C	G	0.109	1.94	0.00053845	0.112	1.058	0.556239	0.11	1.62	0.001729	PRR16/FTMT
rs10052257	Geno	5	123188566	T	C	0.26	1.62	0.000290107	0.272	0.836	0.217187	0.264	1.33	0.02915	CSNK1G3/ZNF608
rs4389684	Imp	5	124040168	T	G	0.405	0.62	0.000968464	0.403	0.81	0.483624	0.404	0.68	0.00214	ZNF608
rs17567339	Imp	5	125375068	C	G	0.511	1.55	0.00041072	0.504	0.839	0.529014	0.509	1.25	0.0136	ZNF608/GRAMD3
rs72797396	Imp	5	132007913	A	T	0.256	0.47	3.47519e-05	0.238	0.868	0.311498	0.25	0.59	8.457e-05	IL13/IL4
rs4705963	Imp	5	132029491	G	A	0.697	0.62	2.1481e-06	0.68	0.816	0.0647815	0.691	0.67	9.158e-07	KIF3A
rs11950409	Geno	5	134556555	C	T	0.1	1.79	0.000198394	0.12	0.84	0.640219	0.106	1.44	0.006626	C5orf66
rs17703466	Imp	5	136445825	C	T	0.209	1.48	0.000846796	0.192	0.977	0.612028	0.203	1.32	0.002833	SPOCK1
rs187167	Geno	5	139029000	A	G	0.082	0.39	0.000420501	0.075	1.052	0.640436	0.08	0.64	0.001845	CXXC5
rs77865538	Imp	5	139238816	T	C	0.05	2.09	0.000327887	0.059	0.521	0.115204	0.053	1.59	0.05081	NRG2
rs248539	Imp	5	141149655	A	G	0.604	0.67	0.00030147	0.605	0.854	0.472417	0.604	0.72	0.0008569	ARAP3/PCDH1
rs17110343	Imp	5	149095031	T	A	0.09	1.78	0.000277214	0.091	0.747	0.548567	0.09	1.45	0.01024	ARHGEF37/PPARGC1B
rs216150	Imp	5	149447628	G	A	0.65	1.53	0.000171564	0.659	0.812	0.352474	0.653	1.22	0.01352	CSF1R
rs1423466	Geno	5	152786520	C	T	0.728	1.75	0.000716908	0.715	1.207	0.907614	0.724	1.52	0.008002	NMUR2/GRIA1
rs77991003	Imp	5	157592330	C	T	0.056	2.11	0.000112691	0.054	1.221	0.46859	0.056	1.82	0.0004055	CLINT1/EBF1
rs1474190	Imp	5	159356484	G	T	0.221	1.63	2.93389e-05	0.223	0.905	0.808932	0.222	1.37	0.001295	ADRA1B
rs35595324	Imp	5	160367377	T	C	0.101	2.02	1.07023e-05	0.114	1.067	0.668835	0.105	1.69	0.001014	ATP10B/GABRB2
rs6889122	Imp	5	165444180	A	G	0.071	2.02	0.000353573	0.068	1.204	0.263809	0.07	1.76	0.0004042	MAT2B/TENM2
rs11953982	Imp	5	168453795	A	C	0.066	1.8	0.000718614	0.063	0.667	0.222586	0.065	1.51	0.04597	SLIT3
rs2569219	Imp	5	171864497	G	A	0.494	0.65	0.00034841	0.487	0.773	0.0591302	0.492	0.69	6.391e-05	SH3PXD2B
rs7722022	Imp	5	172934898	A	C	0.407	0.61	0.00025817	0.4	0.952	0.867032	0.405	0.71	0.00452	STC2/BOD1
rs6895999	Geno	5	178618707	A	C	0.078	1.87	0.000618714	0.078	0.783	0.528155	0.078	1.54	0.01739	ADAMTS2
rs2816243	Imp	6	1450397	G	A	0.555	0.66	0.00033059	0.542	1.362	0.220473	0.55	0.84	0.03082	FOXF2/FOXC1
rs10900942	Imp	6	3404052	G	A	0.335	1.52	0.000329827	0.326	1.276	0.178061	0.332	1.44	0.0002258	SLC22A23
rs12190460	Imp	6	3881764	A	G	0.093	0.24	0.000155056	0.09	0.597	0.614857	0.092	0.37	0.0008333	FAM50B/PRPF4B
rs74750249	Imp	6	5459680	A	C	0.054	1.94	0.000314923	0.052	1.455	0.396993	0.054	1.81	0.0006715	FARS2
rs6917809	Geno	6	9801994	C	T	0.641	0.63	0.00015603	0.648	0.763	0.130034	0.643	0.67	8.118e-05	OFCC1
rs1810451	Imp	6	11358353	G	A	0.642	0.67	0.000199897	0.639	1.004	0.717682	0.641	0.77	0.001345	NEDD9
rs9349459	Geno	6	13111241	A	G	0.308	1.61	4.92215e-05	0.332	1.071	0.376904	0.316	1.41	0.0001507	PHACTR1
rs765168	Imp	6	17089285	C	T	0.16	1.75	0.000133416	0.16	0.834	0.874397	0.16	1.43	0.002897	ATXN1/STMND1
rs114735690	Imp	6	19666971	A	G	0.054	2.56	6.15473e-06	0.057	1.365	0.212256	0.055	2.16	1.201e-05	RNF144B/ID4
rs6904518	Geno	6	19798704	G	A	0.381	1.39	0.000728317	0.407	1.137	0.386749	0.389	1.3	0.00123	RNF144B/ID4
rs3812108	Imp	6	25082699	G	A	0.258	1.52	0.000907724	0.254	1.148	0.847901	0.257	1.39	0.01064	FAM65B/LRRC16A
rs17500510	Geno	6	32712818	A	G	0.086	1.5	0.000527826	0.096	0.632	0.254762	0.089	1.21	0.03476	HLA-DQA2
rs3130215	Geno	6	33074963	G	A	0.602	1.5	0.000348664	0.597	1.463	0.000951518	0.6	1.48	1.299e-06	HLA-DPB1/HCG24
rs4713982	Imp	6	36491042	T	G	0.073	1.96	0.000319822	0.079	1.262	0.409437	0.075	1.75	0.0007129	STK38
rs12215229	Geno	6	46614439	G	T	0.126	1.67	0.000836649	0.119	1.259	0.144771	0.124	1.54	0.0003806	CYP39A1
rs1617315	Imp	6	47102342	G	C	0.615	1.52	0.000433431	0.623	0.812	0.534616	0.618	1.21	0.01385	GPR110/TNFRSF21
rs79133460	Imp	6	49659306	A	C	0.055	2.05	0.000601295	0.052	0.49	0.142635	0.054	1.63	0.05898	RHAG/CRISP2
rs7383246	Imp	6	52595308	G	A	0.468	1.55	0.000293066	0.465	0.871	0.996623	0.467	1.27	0.003613	TMEM14A/GSTA2
rs512829	Imp	6	53481278	A	C	0.852	0.6	0.000730524	0.848	0.75	0.48156	0.851	0.64	0.001719	GCLC
rs4374812	Imp	6	67646891	T	C	0.815	0.64	0.000459374	0.81	0.92	0.322753	0.813	0.72	0.0006608	EYS/BAI3
rs35535498	Imp	6	67956252	A	G	0.155	1.87	6.73245e-05	0.145	0.867	0.442631	0.152	1.52	0.005972	EYS/BAI3
rs61300269	Imp	6	73144848	C	T	0.065	1.69	0.000632774	0.058	0.562	0.168517	0.063	1.4	0.05359	RIMS1/KCNQ5
rs846453	Imp	6	79292075	G	C	0.571	0.64	3.41384e-05	0.578	1.135	0.59763	0.574	0.77	0.002534	MEI4/IRAK1BP1
rs9294130	Geno	6	79861169	A	G	0.331	0.63	0.000456794	0.328	0.89	0.448938	0.33	0.72	0.00108	PHIP/HMGN3
rs16893126	Geno	6	82126750	G	A	0.167	1.59	0.000256996	0.158	0.795	0.571347	0.164	1.33	0.009229	BCKDHB/FAM46A
rs770897	Imp	6	83063804	G	T	0.597	1.5	0.000266518	0.62	1.452	0.101226	0.604	1.48	9.375e-05	IBTK/TPBG
rs75230529	Imp	6	94720726	T	G	0.292	1.49	0.000251985	0.304	1.294	0.0916415	0.296	1.42	7.938e-05	EPHA7/MANEA
rs9363188	Imp	6	95072132	C	T	0.291	1.51	9.67059e-05	0.296	1.142	0.355014	0.292	1.38	0.0002284	EPHA7/MANEA
rs79662282	Imp	6	96267616	G	C	0.085	0.28	0.00074958	0.079	2.351	0.000693058	0.083	1.08	0.4869	MANEA/FUT9
rs9493032	Imp	6	99432900	C	A	0.092	0.39	0.000999908	0.086	0.536	0.237629	0.09	0.44	0.0008131	FBXL4/FAXC
rs7765232	Imp	6	102612685	T	G	0.586	1.43	0.000795464	0.593	0.662	0.0334502	0.588	1.09	0.1515	GRIK2/HACE1
rs6914611	Imp	6	105822165	C	T	0.108	1.73	0.000607414	0.094	0.776	0.27462	0.104	1.46	0.03502	PREP
rs9487671	Imp	6	111899539	C	T	0.057	1.85	0.000444557	0.062	0.739	0.215733	0.058	1.5	0.0367	TRAF3IP2
rs6569428	Imp	6	125893304	C	G	0.566	1.75	4.23887e-05	0.573	1.101	0.525736	0.568	1.48	0.0002427	HDDC2/HEY2
rs60726027	Imp	6	125979712	T	A	0.104	2.01	0.000132558	0.104	0.814	0.290184	0.104	1.61	0.01448	HDDC2/HEY2
rs73774766	Imp	6	129533153	T	G	0.131	1.67	0.000430215	0.123	0.738	0.549518	0.128	1.39	0.01328	LAMA2
rs12527232	Imp	6	131328618	T	C	0.146	1.63	0.000663009	0.162	0.777	0.270283	0.151	1.32	0.03725	EPB41L2
rs1418702	Imp	6	133315726	A	G	0.17	0.58	0.000842837	0.161	0.954	0.615457	0.167	0.71	0.00285	RPS12/EYA4
rs1856293	Imp	6	133480940	C	A	0.472	0.67	0.000326052	0.475	0.933	0.95332	0.473	0.75	0.004296	RPS12/EYA4
rs1743967	Imp	6	134488516	G	T	0.521	0.65	0.000568225	0.506	0.814	0.296338	0.516	0.7	0.0006927	SLC2A12/SGK1
rs4896105	Imp	6	135128515	T	C	0.397	1.58	0.000666612	0.401	1.265	0.158865	0.398	1.47	0.0003513	SGK1/ALDH8A1
rs9484079	Imp	6	137966943	T	G	0.461	0.63	0.000533582	0.468	1.15	0.49551	0.463	0.78	0.01729	OLIG3/TNFAIP3
rs10782267	Geno	6	138102476	C	A	0.276	0.62	0.000975839	0.267	1.071	0.952601	0.273	0.77	0.008877	OLIG3/TNFAIP3
rs1131431	Geno	6	139693834	A	G	0.172	0.48	0.000803329	0.166	1.049	0.70429	0.17	0.67	0.01351	CITED2
rs9498143	Imp	6	149049081	C	G	0.421	1.39	0.000765118	0.412	0.781	0.500341	0.418	1.15	0.02111	SASH1/UST
rs2449394	Imp	6	149274886	C	T	0.468	0.68	0.000757664	0.455	1.21	0.472172	0.464	0.83	0.02252	UST
rs669929	Imp	6	153464506	T	C	0.514	1.53	0.000248546	0.531	0.944	0.907859	0.519	1.3	0.002566	RGS17/OPRM1
rs60707704	Imp	6	154829835	G	A	0.317	0.61	0.000178659	0.327	0.885	0.442643	0.32	0.71	0.00052	CNKSR3
rs11752827	Imp	6	155363380	T	G	0.123	1.65	0.000399231	0.132	0.771	0.254654	0.126	1.36	0.02995	TIAM2
rs10945957	Imp	6	164532276	C	A	0.446	0.63	0.000671481	0.449	0.838	0.349508	0.447	0.7	0.0009973	QKI/C6orf118
rs79894230	Imp	6	164638140	G	A	0.112	1.78	0.000314312	0.128	0.913	0.574062	0.117	1.47	0.01035	QKI/C6orf118
rs140491395	Imp	6	167111073	A	T	0.085	2.31	7.67459e-06	0.084	1.124	0.650608	0.085	1.91	0.0001099	RPS6KA2
rs6456197	Imp	6	170620089	A	G	0.674	0.68	0.000921842	0.674	1.002	0.406718	0.674	0.77	0.001589	FAM120B
rs10231813	Imp	7	4514935	C	T	0.65	0.65	0.000840284	0.648	0.67	0.00447061	0.65	0.66	1.214e-05	SDK1/FOXK1
rs7785898	Imp	7	5269424	C	A	0.874	2.32	0.00053295	0.88	1.526	0.241757	0.876	1.96	0.0004988	WIPI2
rs34702628	Imp	7	6763386	A	G	0.136	1.74	0.000610542	0.145	0.907	0.727738	0.139	1.45	0.003046	ZNF12/RSPH10B2
rs10261575	Imp	7	11225216	C	T	0.195	1.57	0.000520326	0.18	1.484	0.137381	0.19	1.54	0.000239	PHF14/THSD7A
rs78948389	Imp	7	11238407	C	T	0.129	1.74	0.000488929	0.125	0.818	0.482116	0.128	1.42	0.017	PHF14/THSD7A
rs73056170	Imp	7	13011783	G	C	0.136	0.49	0.000437351	0.129	0.887	0.363587	0.134	0.63	0.0007568	ARL4A/ETV1
rs73065439	Imp	7	13069739	C	T	0.121	1.78	0.000587772	0.114	1.064	0.954261	0.118	1.55	0.005133	ARL4A/ETV1
rs7458455	Imp	7	17239633	T	G	0.155	0.51	0.000214164	0.161	0.98	0.895266	0.157	0.68	0.002247	AGR3/AHR
rs71524203	Imp	7	17246522	A	C	0.162	1.64	0.000429766	0.155	1.067	0.940625	0.16	1.43	0.005308	AGR3/AHR
rs6972422	Geno	7	18834375	C	T	0.243	1.63	0.000612465	0.25	0.876	0.531413	0.245	1.36	0.01714	HDAC9
rs7800133	Imp	7	21422413	A	G	0.78	0.64	0.000546176	0.785	0.738	0.0533898	0.782	0.67	8.552e-05	SP8/SP4
rs73282286	Imp	7	22366588	T	C	0.241	1.53	0.000383826	0.223	0.995	0.723054	0.235	1.35	0.008159	RAPGEF5
rs117219133	Imp	7	23394890	A	G	0.082	1.88	3.86512e-05	0.079	0.947	0.910159	0.081	1.61	0.001183	IGF2BP3
rs79730837	Imp	7	26161969	C	A	0.103	1.8	0.000386852	0.098	1.134	0.50744	0.101	1.59	0.001161	NPVF/NFE2L3
rs55826100	Imp	7	26926498	G	A	0.115	0.47	0.000776946	0.095	1.293	0.236795	0.109	0.72	0.04549	SKAP2
rs6951061	Geno	7	28928171	C	T	0.203	1.53	0.000420255	0.214	1.075	0.710416	0.206	1.36	0.002233	CREB5/TRIL
rs2304316	Imp	7	43600227	A	G	0.462	0.66	0.000223751	0.449	0.903	0.339502	0.458	0.73	0.0004064	HECW1
rs113661251	Imp	7	45691931	G	T	0.077	1.9	0.000116335	0.081	0.774	0.370583	0.079	1.53	0.01025	ADCY1
rs11763862	Imp	7	45896610	G	A	0.12	1.74	0.00015174	0.115	0.848	0.70497	0.118	1.45	0.004775	ADCY1/IGFBP1
rs4947756	Geno	7	52990398	A	C	0.559	0.59	1.74449e-05	0.567	0.926	0.765531	0.562	0.69	0.0002814	COBL/POM121L12
rs6962316	Imp	7	53036680	T	C	0.149	1.67	0.000202782	0.151	0.771	0.307014	0.15	1.37	0.01725	COBL/POM121L12
rs34451941	Imp	7	57518712	T	A	0.369	1.48	0.0006099	0.394	1.085	0.62954	0.377	1.33	0.002342	ZNF716
rs638873	Imp	7	63771235	T	C	0.654	1.58	0.000667229	0.651	1.013	0.699618	0.653	1.34	0.003017	ZNF736
rs10231628	Imp	7	66924045	G	A	0.299	1.58	0.000213023	0.294	1.21	0.71652	0.297	1.45	0.001403	TYW1/AUTS2
rs34829411	Imp	7	67317529	A	G	0.065	2.13	0.000775035	0.063	1.29	0.396764	0.064	1.85	0.00134	TYW1/AUTS2
rs757709	Imp	7	70900127	A	C	0.901	0.54	9.26653e-05	0.901	0.642	0.0206355	0.901	0.57	6.201e-06	WBSCR17
rs619096	Geno	7	71126019	A	G	0.287	0.58	0.000168279	0.276	0.985	0.379323	0.283	0.71	0.0003874	WBSCR17
rs10215166	Imp	7	75254194	C	A	0.068	1.9	0.000309505	0.062	0.858	0.484339	0.066	1.59	0.01293	HIP1
rs71560493	Imp	7	75515664	A	G	0.062	2.11	0.000144373	0.06	0.837	0.624129	0.062	1.68	0.005682	RHBDD2
rs3847082	Imp	7	77917440	C	T	0.08	1.78	0.000161403	0.082	0.595	0.134973	0.08	1.43	0.03186	MAGI2
rs16886321	Geno	7	78396047	C	T	0.06	1.97	2.14884e-05	0.062	1.177	0.583294	0.06	1.72	0.0001816	MAGI2
rs11972597	Geno	7	82168867	G	A	0.225	1.52	0.000811403	0.239	0.73	0.136315	0.229	1.24	0.07057	CACNA2D1/PCLO
rs12704507	Imp	7	89630983	C	T	0.13	0.45	0.000527232	0.123	1.187	0.676317	0.128	0.7	0.01109	C7orf62/STEAP1
rs2237587	Imp	7	95621361	A	G	0.286	0.65	0.000909979	0.284	0.935	0.878363	0.285	0.74	0.005802	DYNC1I1
rs817753	Imp	7	98200086	C	T	0.087	1.87	0.000716602	0.088	1.193	0.3709	0.087	1.65	0.001143	BAIAP2L1/NPTX2
rs62472618	Imp	7	98365330	A	G	0.158	1.91	9.71961e-05	0.147	0.785	0.440688	0.155	1.52	0.007439	NPTX2/TMEM130
rs6946662	Imp	7	103987098	T	C	0.47	1.4	0.000580041	0.463	0.858	0.792993	0.468	1.18	0.009016	LHFPL3
rs55916591	Imp	7	105257010	T	C	0.136	1.63	0.000213179	0.14	0.509	0.0307979	0.137	1.26	0.09011	ATXN7L1
rs6954882	Imp	7	106413319	G	A	0.093	2.01	1.03062e-05	0.076	0.473	0.104474	0.088	1.65	0.009804	CCDC71L/PIK3CG
rs12705391	Imp	7	106415156	G	A	0.447	0.63	0.000330384	0.459	1.087	0.860278	0.451	0.77	0.005386	CCDC71L/PIK3CG
rs10953573	Imp	7	108099837	G	A	0.123	0.49	0.000977237	0.124	0.879	0.682508	0.123	0.63	0.003794	NRCAM/PNPLA8
rs6980230	Imp	7	110411171	T	A	0.573	0.69	0.000434614	0.571	0.991	0.581852	0.572	0.78	0.001595	IMMP2L
rs10238185	Geno	7	115638026	G	A	0.677	0.68	0.00095613	0.68	0.694	0.0563726	0.678	0.68	0.0001503	TFEC
rs10254737	Imp	7	131932626	T	G	0.338	1.71	7.70694e-06	0.345	0.97	0.922536	0.34	1.43	0.0004002	PLXNA4
rs12674450	Imp	7	131980494	G	A	0.109	1.94	9.53782e-07	0.112	1.378	0.135698	0.11	1.75	1.376e-06	PLXNA4
rs75254693	Imp	7	140819011	A	G	0.053	0.15	0.000831257	0.059	0.673	0.308826	0.055	0.4	0.0009919	TMEM178B
rs77982180	Imp	7	147916324	A	G	0.161	1.79	3.01734e-05	0.156	1.163	0.626818	0.16	1.58	0.0002679	CNTNAP2
rs13223879	Imp	7	150502868	A	G	0.176	1.63	0.000347426	0.177	0.827	0.465813	0.177	1.35	0.01454	TMEM176A/AOC1
rs391303	Imp	7	151046649	T	C	0.377	1.51	0.000357135	0.391	0.777	0.0875149	0.381	1.23	0.06347	NUB1
rs13225306	Imp	7	153185894	C	A	0.573	0.66	0.000994651	0.581	0.783	0.200242	0.575	0.7	0.0006523	ACTR3B/DPP6
rs11772318	Imp	7	155207461	A	G	0.055	2.14	9.90664e-05	0.051	0.337	0.055543	0.054	1.67	0.04623	BLACE/EN2
rs1225392	Imp	7	155627132	T	C	0.128	1.82	0.000152366	0.117	0.948	0.760778	0.124	1.55	0.004169	SHH/C7orf13
rs61045572	Imp	7	157299429	T	G	0.089	1.61	0.000935955	0.106	0.799	0.620957	0.095	1.34	0.0179	DNAJB6/PTPRN2
rs35449143	Imp	7	157455792	T	C	0.256	0.56	0.000124336	0.267	0.993	0.847402	0.26	0.71	0.002958	PTPRN2
rs66801056	Imp	8	527618	A	G	0.127	1.83	0.000104971	0.127	1.145	0.964283	0.127	1.61	0.001981	TDRP/ERICH1
rs1871818	Imp	8	3624412	G	T	0.463	1.47	0.000941991	0.444	1.244	0.288641	0.457	1.39	0.0009998	CSMD1
rs17456816	Imp	8	5828147	A	G	0.065	2.18	0.000453843	0.071	0.737	0.816824	0.067	1.63	0.003097	CSMD1/MCPH1
rs7831141	Imp	8	5833517	A	G	0.06	1.89	0.00036498	0.065	1.301	0.606486	0.061	1.71	0.00151	CSMD1/MCPH1
rs2947361	Imp	8	12773349	C	T	0.242	1.57	0.000612925	0.233	0.699	0.125756	0.239	1.27	0.06496	LONRF1/KIAA1456
rs979950	Imp	8	14175487	G	A	0.457	1.52	0.000529965	0.433	0.888	0.478666	0.449	1.29	0.01798	SGCZ
rs2736022	Imp	8	15691412	A	C	0.712	0.64	0.000519568	0.733	1.032	0.383235	0.719	0.74	0.000935	TUSC3/MSR1
rs113085402	Imp	8	16721923	G	C	0.053	3.08	1.1855e-06	0.06	0.781	0.587731	0.055	2.27	0.0003369	MSR1/FGF20
rs6586768	Imp	8	18686593	A	C	0.272	1.6	0.000640706	0.291	0.809	0.51672	0.278	1.29	0.01826	PSD3
rs10104610	Imp	8	19915554	C	G	0.305	1.64	2.19748e-05	0.298	1.063	0.747621	0.303	1.42	0.0003128	LPL/SLC18A1
rs6998704	Imp	8	29000610	G	A	0.454	1.52	0.000254995	0.443	1.375	0.075928	0.45	1.47	6.439e-05	KIF13B
rs10100329	Imp	8	34339959	T	C	0.117	0.43	0.000457624	0.112	0.932	0.68407	0.115	0.6	0.002211	DUSP26/UNC5D
rs59232245	Imp	8	39490953	G	A	0.138	1.52	0.000800899	0.155	0.65	0.0649897	0.144	1.23	0.1096	ADAM18
rs10112487	Imp	8	41705661	T	C	0.091	1.77	0.000753494	0.101	1.087	0.871231	0.094	1.54	0.005012	ANK1
rs60583234	Imp	8	54132452	A	T	0.05	2.28	2.94567e-05	0.055	1.001	0.780972	0.051	1.89	0.001399	NPBWR1/OPRK1
rs4236995	Geno	8	56492754	C	T	0.466	1.45	0.000588289	0.45	0.786	0.12642	0.461	1.2	0.06344	XKR4/TMEM68
rs10957049	Imp	8	59289731	C	T	0.195	1.58	0.000292228	0.202	0.954	0.744077	0.197	1.37	0.006544	FAM110B/UBXN2B
rs62505129	Imp	8	59796557	C	T	0.061	2.14	0.000551349	0.066	0.763	0.284734	0.063	1.65	0.03214	TOX
rs62511183	Imp	8	67348488	T	A	0.06	1.82	0.000889673	0.058	1.435	0.592314	0.059	1.71	0.00278	ADHFE1
rs10216347	Geno	8	72408502	T	C	0.292	0.65	0.000732599	0.297	1.082	0.771597	0.294	0.79	0.01097	EYA1/RP11-383H13.1
rs72670023	Imp	8	73718066	A	G	0.058	1.89	0.000839764	0.071	2.126	0.00480493	0.063	1.97	1.292e-05	KCNB2
rs10957665	Geno	8	74349858	C	T	0.476	0.62	0.000168692	0.48	1.11	0.893048	0.477	0.76	0.003222	STAU2
rs269182	Imp	8	75595447	A	G	0.949	4.48	0.000645793	0.945	1.036	0.877968	0.947	1.79	0.007985	GDAP1/PI15
rs60216638	Imp	8	76048505	G	A	0.272	1.4	0.000608799	0.276	0.69	0.2912	0.273	1.14	0.0332	CRISPLD1/CASC9
rs2956252	Imp	8	80684881	G	A	0.273	0.66	0.000681823	0.259	0.885	0.47154	0.269	0.73	0.001579	HEY1/MRPS28
rs12541643	Imp	8	81076874	T	C	0.482	1.51	0.000756675	0.501	1.066	0.588268	0.488	1.34	0.00244	TPD52
rs11782610	Imp	8	87566158	G	A	0.73	0.65	0.000123194	0.712	1.135	0.797961	0.724	0.77	0.003324	CPNE3
rs56075881	Imp	8	87627420	G	C	0.262	0.59	0.000349906	0.255	0.956	0.898302	0.26	0.72	0.003163	CNGB3
rs17756061	Imp	8	93489016	A	G	0.129	2.01	4.59019e-06	0.126	1.27	0.249467	0.128	1.76	1.242e-05	RUNX1T1/TRIQK
rs2512067	Imp	8	98848970	T	G	0.944	0.54	0.000908268	0.942	1.228	0.802808	0.944	0.66	0.004853	LAPTM4B
rs77179439	Imp	8	103184684	C	G	0.075	2.16	3.01571e-05	0.077	0.454	0.0365506	0.075	1.63	0.03457	NCALD/RRM2B
rs2926696	Imp	8	106110700	T	G	0.417	1.51	0.00046438	0.405	1.013	0.91741	0.413	1.32	0.005891	LRP12/ZFPM2
rs28636468	Imp	8	108352530	G	A	0.139	1.69	0.000144654	0.164	1.124	0.355948	0.147	1.48	0.0003123	ANGPT1
rs116366455	Imp	8	118459145	G	A	0.063	0.37	0.000741238	0.075	1.474	0.359113	0.067	0.83	0.03011	SLC30A8/MED30
rs7815027	Geno	8	125215606	G	A	0.679	0.64	4.21596e-05	0.689	1.025	0.681626	0.682	0.74	0.0004038	FER1L6/TMEM65
rs55635625	Imp	8	126608634	T	G	0.24	0.59	0.000343419	0.224	0.847	0.551032	0.235	0.67	0.001222	TRIB1/FAM84B
rs1372992	Geno	8	129597659	T	C	0.788	0.65	0.000129142	0.779	1.058	0.538462	0.785	0.74	0.006661	TMEM75/CCDC26
rs13270154	Imp	8	131554322	C	T	0.226	1.56	0.000566436	0.233	1.088	0.860491	0.228	1.4	0.004015	ASAP1/ADCY8
rs1503766	Imp	8	134968501	T	G	0.155	1.61	0.000488307	0.155	0.974	0.72217	0.155	1.4	0.009505	ST3GAL1/ZFAT
rs34803757	Imp	8	136646414	T	G	0.068	1.96	0.000738124	0.059	1.203	0.812286	0.065	1.76	0.004295	KHDRBS3
rs1027787	Geno	8	140013519	T	C	0.948	0.43	1.29194e-06	0.942	0.648	0.509292	0.946	0.48	1.821e-05	COL22A1/KCNK9
rs12680959	Imp	8	140051028	G	A	0.198	1.78	2.73927e-06	0.197	1.011	0.910408	0.197	1.51	0.0002115	COL22A1/KCNK9
rs6994692	Geno	8	142239377	A	C	0.086	2	3.28009e-05	0.077	1.225	0.425249	0.083	1.79	0.0001367	SLC45A4
rs13254725	Imp	8	143113348	C	A	0.123	0.49	0.000916529	0.108	0.686	0.349493	0.118	0.55	0.001272	MROH5/TSNARE1
rs12334749	Imp	8	145033759	A	G	0.102	0.34	0.000505907	0.111	0.628	0.230943	0.104	0.45	0.00045	PLEC
rs13249442	Imp	8	146027174	C	T	0.07	2.24	0.000118082	0.068	0.288	0.0325237	0.069	0.59	0.06783	ZNF517
rs79984518	Imp	9	2018385	C	A	0.058	2.68	2.88483e-05	0.055	0.568	0.527427	0.057	1.98	0.002805	SMARCA2
rs12338751	Imp	9	2333996	G	A	0.23	1.6	3.68376e-05	0.238	0.86	0.472704	0.233	1.33	0.003826	SMARCA2/VLDLR
rs34999357	Imp	9	7917874	C	T	0.273	1.59	0.000216219	0.252	1.499	0.0239277	0.266	1.56	1.58e-05	TMEM261/PTPRD
rs6477407	Imp	9	9720433	T	A	0.339	0.51	5.45419e-06	0.324	0.778	0.489614	0.334	0.6	4.756e-05	PTPRD
rs1169239	Geno	9	13350478	C	T	0.08	1.58	0.00091746	0.077	1.277	0.500366	0.079	1.49	0.002166	MPDZ/NFIB
rs12551855	Imp	9	14093727	T	A	0.067	1.88	0.000190521	0.074	0.926	0.849796	0.07	1.56	0.003871	NFIB
rs538247	Imp	9	22450566	C	T	0.18	1.54	0.000692618	0.18	0.995	0.904876	0.18	1.35	0.007872	DMRTA1
rs117857923	Imp	9	23925279	T	G	0.05	2.28	0.000589403	0.05	2.035	0.0635399	0.05	2.2	0.0001104	ELAVL2/IZUMO3
rs1347336	Imp	9	26670710	G	T	0.778	0.63	0.000120736	0.776	0.833	0.240924	0.777	0.68	0.0001512	TUSC1/CAAP1
rs10973156	Imp	9	36986784	T	A	0.71	0.65	0.000384779	0.704	0.891	0.590903	0.708	0.71	0.001499	PAX5
rs773018	Imp	9	77774734	C	G	0.133	1.78	0.000152744	0.142	0.759	0.51142	0.136	1.43	0.007924	OSTF1/PCSK5
rs71509842	Imp	9	78502458	G	A	0.095	1.72	0.000592305	0.085	1.254	0.577967	0.092	1.57	0.001979	OSTF1/PCSK5
rs7872136	Imp	9	85901918	A	G	0.936	0.57	0.00076281	0.949	0.791	0.612646	0.94	0.62	0.002629	FRMD3
rs12005437	Imp	9	89187357	A	G	0.057	2.15	0.000517798	0.064	1.022	0.462444	0.06	1.69	0.001244	ZCCHC6/GAS1
rs10117819	Geno	9	89193482	T	C	0.494	1.5	0.00054703	0.476	0.698	0.0212039	0.488	1.15	0.1583	ZCCHC6/GAS1
rs690156	Imp	9	93350262	A	G	0.266	1.59	0.000178164	0.278	1.082	0.812661	0.27	1.41	0.004056	GADD45G/DIRAS2
rs10761218	Imp	9	96127974	G	A	0.734	1.69	0.000251328	0.723	0.854	0.206687	0.73	1.29	0.02823	C9orf129/FAM120AOS
rs2265007	Imp	9	98993074	G	A	0.32	1.43	0.000476218	0.312	0.99	0.805344	0.318	1.27	0.007731	ERCC6L2/HSD17B3
rs116537920	Imp	9	99898755	A	G	0.069	1.63	0.000948318	0.069	0.874	0.831565	0.069	1.4	0.01134	CTSV/CCDC180
rs78914846	Imp	9	110402835	G	C	0.072	1.83	0.000427147	0.078	0.922	0.839464	0.074	1.51	0.00667	KLF4/ACTL7B
rs7855288	Imp	9	117054542	T	C	0.309	1.63	0.00024438	0.313	1.278	0.134037	0.311	1.51	0.0001227	COL27A1
rs1249761	Imp	9	117069223	C	T	0.644	0.66	0.00050623	0.651	0.865	0.254884	0.647	0.72	0.0005138	COL27A1
rs2119687	Imp	9	119526621	A	G	0.423	1.5	0.000567887	0.417	0.995	0.964787	0.421	1.31	0.006037	ASTN2
rs4836905	Imp	9	125423189	T	A	0.226	1.49	0.000329526	0.237	0.929	0.766313	0.23	1.3	0.006697	OR1B1/OR1L1
rs10819124	Imp	9	128878065	G	A	0.273	1.61	0.000367793	0.278	1.033	0.942481	0.275	1.41	0.00477	PBX3/MVB12B
rs1055352	Geno	9	128910419	A	G	0.466	0.65	0.000329943	0.462	1.099	0.468436	0.465	0.78	0.01401	PBX3/MVB12B
rs79312491	Imp	9	132203719	G	C	0.113	1.89	0.000276565	0.107	0.842	0.85889	0.111	1.54	0.004817	C9orf106/NTMT1
rs11103293	Imp	9	138950617	G	A	0.805	0.59	6.68253e-05	0.813	1.149	0.926241	0.808	0.7	0.001622	NACC2
rs3818728	Imp	10	2114483	G	C	0.766	0.68	0.000603483	0.752	1.175	0.749568	0.762	0.8	0.0102	ADARB2/PFKP
rs1547294	Imp	10	2184888	C	T	0.402	0.65	0.000473683	0.395	1.039	0.674489	0.4	0.78	0.01042	ADARB2/PFKP
rs113179292	Imp	10	7028295	A	G	0.151	0.52	0.000792672	0.149	1.006	0.856554	0.15	0.69	0.005015	PRKCQ/SFMBT2
rs78154709	Imp	10	8869146	T	C	0.143	1.55	0.000610824	0.131	1.054	0.747347	0.139	1.4	0.003203	GATA3/CELF2
rs4749900	Imp	10	9928512	T	C	0.914	0.55	0.00019773	0.901	1.274	0.615028	0.91	0.68	0.007046	GATA3/CELF2
rs2454778	Imp	10	11480114	T	G	0.131	1.75	5.18056e-05	0.145	0.933	0.929995	0.136	1.46	0.00136	CELF2/USP6NL
rs61830978	Imp	10	11487677	G	C	0.092	0.36	0.000820535	0.088	0.985	0.974811	0.091	0.58	0.006734	CELF2/USP6NL
rs79325104	Imp	10	12531493	G	C	0.1	1.77	0.000131899	0.098	1.515	0.0256094	0.099	1.68	1.077e-05	CAMK1D
rs3995590	Geno	10	13836782	T	C	0.693	0.66	0.000425228	0.694	1.415	0.0836151	0.693	0.82	0.07089	FRMD4A
rs61844686	Imp	10	15043760	C	T	0.221	0.6	0.000624538	0.217	0.937	0.916949	0.22	0.71	0.004905	MEIG1/OLAH
rs4748888	Imp	10	23716367	A	T	0.31	1.61	5.43676e-05	0.317	0.756	0.291124	0.312	1.3	0.008824	C10orf67/OTUD1
rs10443986	Imp	10	24858989	G	C	0.198	1.73	0.000108962	0.19	1.21	0.447224	0.195	1.56	0.0003652	KIAA1217/ARHGAP21
rs7920573	Imp	10	30585274	G	T	0.09	2.09	2.18923e-05	0.095	1.016	0.859022	0.091	1.72	0.0009383	KIAA1462/MTPAP
rs1011590	Imp	10	30591205	C	A	0.554	0.62	3.6606e-05	0.565	1.129	0.5509	0.557	0.76	0.003021	KIAA1462/MTPAP
rs4553317	Imp	10	33295950	G	A	0.05	2.54	1.65667e-06	0.047	0.908	0.622807	0.049	2.07	0.000369	ITGB1/NRP1
rs927096	Geno	10	33444312	T	C	0.126	1.87	9.329e-05	0.122	1.388	0.186138	0.125	1.72	8.554e-05	ITGB1/NRP1
rs148726572	Imp	10	36244355	A	G	0.053	1.97	0.000835959	0.047	0.845	0.897093	0.051	1.65	0.005716	FZD8/NAMPTL
rs979529	Imp	10	45504499	C	A	0.654	0.71	0.000845591	0.65	0.913	0.609941	0.653	0.77	0.002814	ZNF22/OR13A1
rs12719927	Imp	10	47659665	T	A	0.69	0.63	0.000791362	0.694	0.675	0.0539002	0.691	0.64	0.0001208	ANTXRL
rs166816	Imp	10	49452271	G	C	0.173	0.55	0.000531621	0.171	0.852	0.900085	0.172	0.65	0.004224	FRMPD2
rs10509070	Imp	10	58801214	C	G	0.053	1.8	0.000329633	0.057	0.809	0.425461	0.054	1.5	0.01576	ZWINT/IPMK
rs7075796	Imp	10	69234896	A	G	0.058	1.98	0.000793968	0.055	1.293	0.553362	0.057	1.77	0.002284	CTNNA3
rs4747042	Geno	10	72263690	A	G	0.466	1.58	8.49878e-05	0.46	1.192	0.513243	0.464	1.43	0.0003863	PALD1
rs73272695	Imp	10	72317149	T	G	0.132	1.74	0.000306939	0.124	1.337	0.354783	0.13	1.62	0.0005547	PALD1
rs157986	Imp	10	80473233	G	T	0.307	0.59	9.79551e-05	0.311	1.387	0.133192	0.309	0.83	0.02503	RPS24/ZMIZ1
rs35648	Imp	10	80501859	T	C	0.831	0.58	2.85777e-05	0.83	0.843	0.39392	0.83	0.65	0.0001079	RPS24/ZMIZ1
rs12098864	Geno	10	82568041	T	C	0.088	1.82	0.000328042	0.082	0.378	0.0721714	0.086	1.43	0.06866	SH2D4B/NRG3
rs265535	Geno	10	83091584	G	A	0.564	0.7	0.000635365	0.571	1.153	0.777327	0.566	0.82	0.009896	SH2D4B/NRG3
rs60219494	Imp	10	84095310	A	G	0.172	1.67	0.000297601	0.158	1.697	0.00307464	0.167	1.68	3.035e-06	NRG3
rs61856434	Imp	10	87306355	C	G	0.077	2.43	2.98219e-07	0.082	0.889	0.895241	0.079	1.95	5.268e-05	CCSER2/GRID1
rs12783694	Imp	10	87659179	A	G	0.128	1.79	0.000888933	0.129	0.816	0.349301	0.128	1.46	0.03427	GRID1
rs12248646	Imp	10	89936548	G	T	0.109	1.74	0.000617471	0.115	1.284	0.0792119	0.111	1.58	0.0001466	PTEN/RNLS
rs34091137	Imp	10	93606683	A	G	0.102	1.77	0.000297434	0.105	0.871	0.650126	0.103	1.48	0.008291	TNKS2
rs7099796	Imp	10	98016507	C	G	0.905	0.62	0.0005628	0.898	0.958	0.699899	0.903	0.7	0.002673	BLNK
rs10882842	Imp	10	98557448	T	C	0.192	1.57	0.000491583	0.19	1.179	0.179811	0.191	1.43	0.0003179	PIK3AP1/LCOR
rs4917838	Imp	10	100279323	C	T	0.92	0.56	0.000700314	0.926	1.074	0.942063	0.922	0.66	0.007298	HPSE2
rs7089031	Imp	10	101693155	G	T	0.377	1.49	0.000973463	0.373	1.077	0.982668	0.376	1.34	0.008298	DNMBP
rs72844686	Imp	10	103755374	G	A	0.06	2.08	0.000572934	0.051	0.735	0.65558	0.057	1.64	0.01224	C10orf76
rs59293203	Imp	10	109501298	T	C	0.057	1.95	0.000171457	0.052	1.543	0.103736	0.056	1.82	6.631e-05	SORCS1/XPNPEP1
rs1330008	Imp	10	109748518	C	T	0.139	1.86	7.40591e-06	0.156	1.434	0.171951	0.145	1.72	1.004e-05	SORCS1/XPNPEP1
rs7093689	Imp	10	112146910	G	A	0.345	0.65	0.00047795	0.334	0.753	0.236834	0.342	0.68	0.0004444	SMNDC1/DUSP5
rs4918711	Imp	10	113850019	T	C	0.912	0.63	0.000230486	0.907	1.776	0.281791	0.91	0.79	0.0202	ADRA2A/GPAM
rs6585256	Imp	10	115746551	C	A	0.73	0.59	4.74845e-05	0.745	1.223	0.236138	0.735	0.72	0.01024	NHLRC2/ADRB1
rs12773399	Geno	10	119422893	T	G	0.189	0.55	0.000584349	0.175	0.966	0.901464	0.184	0.68	0.004521	EMX2/RAB11FIP2
rs12261650	Imp	10	123814472	T	C	0.203	1.58	0.000921144	0.201	0.871	0.357002	0.202	1.33	0.0342	TACC2
rs868366	Imp	10	128001098	A	G	0.055	2.13	0.000821118	0.057	1.263	0.2513	0.056	1.86	0.0007448	ADAM12
rs7072507	Imp	10	129012406	T	C	0.386	0.64	0.000179742	0.387	0.951	0.662643	0.386	0.74	0.001068	DOCK1
rs1762138	Imp	10	132278246	A	G	0.161	1.72	0.000438115	0.161	1.076	0.536483	0.161	1.51	0.001397	GLRX3/TCERG1L
rs7069168	Imp	10	132409744	G	A	0.397	1.52	0.000168792	0.396	1.196	0.200911	0.396	1.4	0.0001534	GLRX3/TCERG1L
rs4910482	Imp	11	9602282	T	C	0.408	0.66	0.000240785	0.419	1.004	0.761246	0.412	0.77	0.001726	WEE1
rs4909997	Geno	11	11426585	C	T	0.115	1.75	0.000197779	0.118	0.658	0.249344	0.116	1.37	0.02095	GALNT18
rs11022268	Imp	11	12290628	C	T	0.954	0.37	9.42243e-08	0.946	1.184	0.804752	0.951	0.49	3.383e-05	MICAL2/MICALCL
rs72873810	Imp	11	17867501	G	A	0.077	2.08	0.000185051	0.065	1.507	0.313334	0.073	1.91	0.0003109	SERGEF
rs79179977	Imp	11	21106074	A	G	0.171	1.66	0.000300578	0.18	0.85	0.932665	0.174	1.38	0.004275	NELL1
rs1001199	Geno	11	21450509	T	G	0.233	1.65	0.000182753	0.225	0.767	0.489476	0.231	1.34	0.009357	NELL1
rs12294573	Geno	11	24087714	T	C	0.288	0.59	0.000537642	0.301	1.124	0.588555	0.292	0.76	0.0138	CCDC179/LUZP2
rs10834836	Geno	11	25906066	G	A	0.573	0.68	0.000669188	0.573	1.08	0.677283	0.573	0.8	0.01282	LUZP2/ANO3
rs77742871	Imp	11	42666849	T	G	0.06	1.79	0.000244716	0.055	0.981	0.982724	0.058	1.59	0.003049	LRRC4C/API5
rs3781605	Imp	11	63331163	T	C	0.189	0.5	0.0007669	0.186	0.64	0.0693726	0.188	0.55	0.0001536	HRASLS2/PLA2G16
rs74777484	Imp	11	67771666	T	C	0.063	0.33	0.000827156	0.074	0.733	0.472102	0.066	0.52	0.00183	UNC93B1
rs3018695	Imp	11	68911500	C	A	0.501	0.63	8.53042e-05	0.479	0.922	0.758943	0.494	0.72	0.0008306	TPCN2/MYEOV
rs12363262	Imp	11	69669159	T	C	0.084	1.82	0.000577036	0.082	0.783	0.329691	0.084	1.51	0.02858	FGF3/ANO1
rs790375	Imp	11	83633003	G	A	0.787	0.63	0.000160829	0.792	1.207	0.11888	0.788	0.75	0.03499	DLG2
rs10501598	Imp	11	85550385	C	G	0.278	0.6	0.000569436	0.255	0.917	0.386869	0.271	0.7	0.001018	SYTL2/CCDC83
rs11234460	Imp	11	85596747	G	A	0.054	2.23	0.000114565	0.064	1.494	0.197714	0.057	1.96	0.0001098	CCDC83
rs2000533	Geno	11	89917928	A	G	0.092	1.95	1.27669e-06	0.096	1.526	0.116584	0.093	1.82	1.379e-06	NAALAD2
rs10765304	Geno	11	90021786	T	C	0.108	1.7	0.00079207	0.101	1.342	0.132936	0.106	1.57	0.0003285	DISC1FP1
rs10765739	Imp	11	95199314	C	A	0.578	0.69	0.000672617	0.589	1.208	0.467737	0.581	0.82	0.02125	SESN3/FAM76B
rs35555461	Imp	11	97555975	A	G	0.119	1.62	0.000673603	0.121	1.35	0.510497	0.12	1.54	0.001774	JRKL/CNTN5
rs7115187	Imp	11	105496338	T	C	0.941	0.49	0.000269963	0.948	0.991	0.862796	0.944	0.57	0.002427	GRIA4
rs7119814	Geno	11	108436646	T	C	0.114	1.69	0.000616787	0.118	1.022	0.559029	0.115	1.45	0.001927	EXPH5
rs77069377	Imp	11	110885077	A	G	0.066	2.25	0.000475555	0.065	1.077	0.900749	0.065	1.89	0.006215	ARHGAP20/C11orf53
rs56135938	Imp	11	111315166	A	C	0.339	0.62	0.000368131	0.332	0.864	0.474362	0.337	0.7	0.001002	POU2AF1
rs375328	Imp	11	114105595	A	G	0.105	0.42	0.000134075	0.109	1.214	0.613716	0.106	0.74	0.00558	ZBTB16
rs10891805	Imp	11	115066481	G	T	0.051	1.92	0.000568294	0.055	1.103	0.47122	0.052	1.65	0.001374	CADM1
rs686133	Imp	11	117373635	T	G	0.643	1.61	0.000363003	0.644	0.824	0.238486	0.644	1.24	0.03021	DSCAML1
rs12802011	Imp	11	119531135	G	A	0.098	1.92	5.82301e-05	0.108	1.175	0.819737	0.101	1.65	0.0007556	PVRL1
rs79761998	Imp	11	120009308	A	C	0.07	2.02	0.000845033	0.076	0.985	0.849224	0.072	1.64	0.005152	TRIM29
rs886946	Imp	12	1937124	C	T	0.801	2.2	0.000566184	0.801	1.141	0.84273	0.801	1.68	0.007937	CACNA2D4/LRTM2
rs78992368	Imp	12	2541799	C	T	0.082	1.82	0.000572825	0.071	1.313	0.609822	0.079	1.67	0.002117	CACNA1C
rs11056521	Imp	12	8080942	T	C	0.466	0.7	0.000526626	0.466	1.164	0.455948	0.466	0.84	0.01901	SLC2A3
rs56344966	Imp	12	16280913	A	G	0.304	0.6	0.000172143	0.308	1.322	0.115606	0.305	0.81	0.03694	DERA/SLC15A5
rs16922707	Imp	12	20296941	G	C	0.166	1.62	0.000368179	0.153	0.723	0.223574	0.162	1.33	0.03223	AEBP2/PDE3A
rs7306689	Imp	12	25774571	T	C	0.757	1.89	3.10123e-05	0.761	1.29	0.167815	0.758	1.65	3.043e-05	IFLTD1
rs11048777	Imp	12	27084789	A	G	0.076	0.28	0.0006629	0.07	1.11	0.647573	0.074	0.62	0.01364	ASUN
rs1551929	Geno	12	29951936	T	C	0.279	1.61	2.13338e-05	0.28	1.398	0.032481	0.279	1.54	2.741e-06	TMTC1/IPO8
rs2653758	Imp	12	38946233	A	C	0.517	1.47	0.000377107	0.518	0.826	0.385653	0.518	1.21	0.01907	ALG10B/CPNE8
rs12372597	Imp	12	42412850	T	C	0.362	0.56	3.38291e-05	0.347	0.987	0.694853	0.357	0.69	0.001925	PDZRN4/GXYLT1
rs1517663	Imp	12	43123242	G	C	0.381	1.66	6.11255e-05	0.35	1.056	0.516586	0.372	1.45	0.0003069	PRICKLE1/ADAMTS20
rs2897890	Imp	12	45943438	T	C	0.09	1.74	0.000928445	0.098	1.18	0.995987	0.092	1.58	0.00767	ANO6/ARID2
rs73092933	Imp	12	46072177	C	T	0.197	0.57	0.000865426	0.191	0.896	0.606515	0.195	0.68	0.002835	ANO6/ARID2
rs55958137	Imp	12	47935647	T	A	0.278	1.53	0.00028468	0.296	0.99	0.766227	0.284	1.33	0.006107	PCED1B/RPAP3
rs2359005	Imp	12	51319346	G	A	0.639	0.59	1.78316e-05	0.613	0.884	0.391082	0.631	0.68	7.482e-05	METTL7A
rs11574532	Imp	12	53594438	T	C	0.094	1.89	9.54447e-05	0.084	0.7	0.360498	0.091	1.56	0.009463	ITGB7
rs139668503	Imp	12	58626430	T	C	0.096	2.17	6.86005e-05	0.097	0.858	0.8142	0.097	1.74	0.002196	XRCC6BP1/RP11-362K2.2
rs11172822	Imp	12	59311394	G	C	0.135	1.79	0.000119596	0.127	1.086	0.816944	0.132	1.57	0.001231	LRIG3
rs4763184	Imp	12	63028149	C	T	0.379	1.45	0.000567359	0.386	1.104	0.57514	0.381	1.33	0.001901	C12orf61/PPM1H
rs1495031	Imp	12	63498136	T	C	0.491	0.67	0.000544935	0.469	0.908	0.517915	0.484	0.74	0.00155	PPM1H/AVPR1A
rs77308961	Imp	12	65976416	T	C	0.116	1.98	7.73094e-05	0.117	0.816	0.738269	0.116	1.58	0.0007312	MSRB3/HMGA2
rs79240615	Imp	12	71474102	A	G	0.062	2.04	0.000585051	0.064	0.836	0.392119	0.062	1.66	0.00106	PTPRR/TSPAN8
rs9783470	Imp	12	71863278	A	G	0.055	1.96	0.000488778	0.053	0.788	0.328696	0.055	1.62	0.02615	LGR5
rs73161177	Imp	12	73279093	C	T	0.179	1.7	7.73767e-05	0.164	0.751	0.0546991	0.174	1.39	0.04163	TRHDE/ATXN7L3B
rs1878149	Imp	12	73442039	A	G	0.185	1.66	3.09758e-05	0.18	0.746	0.143485	0.183	1.36	0.01308	TRHDE/ATXN7L3B
rs11610227	Geno	12	75988459	T	C	0.069	0.39	0.000787024	0.074	0.896	0.885738	0.071	0.6	0.008926	KRR1/PHLDA1
rs938029	Imp	12	78643118	C	A	0.178	1.52	0.000529788	0.171	1.032	0.712467	0.176	1.36	0.002647	NAV3/SYT1
rs4296108	Imp	12	82266267	T	C	0.258	0.59	0.000707393	0.241	1.219	0.405938	0.253	0.8	0.02574	PPFIA2/CCDC59
rs11106857	Imp	12	93509560	A	G	0.472	0.65	0.000963234	0.476	1.151	0.615443	0.473	0.79	0.01845	EEA1/NUDT4
rs1865735	Imp	12	96308351	T	A	0.099	1.67	0.000377648	0.095	1.738	0.0338286	0.097	1.69	3.781e-05	CCDC38
rs138757814	Imp	12	97746759	C	T	0.054	0.25	0.000691202	0.058	0.711	0.295096	0.055	0.46	0.0008047	NEDD1/RMST
rs17815347	Imp	12	98787881	A	G	0.214	1.73	4.58724e-05	0.218	0.933	0.897239	0.215	1.43	0.001368	RMST/TMPO
rs11109825	Imp	12	99802625	T	C	0.213	1.64	5.03052e-05	0.213	0.889	0.940938	0.213	1.37	0.001297	ANKS1B
rs35076711	Imp	12	101441059	A	T	0.141	0.55	0.000870997	0.119	0.65	0.749383	0.134	0.58	0.004138	ANO4
rs7302236	Geno	12	107779889	G	A	0.64	1.45	0.000908949	0.644	0.793	0.268753	0.641	1.16	0.04434	BTBD11
rs7960095	Imp	12	108204129	A	G	0.476	0.69	0.000413603	0.476	0.859	0.822746	0.476	0.74	0.002946	ASCL4/WSCD2
rs11066892	Imp	12	114444405	A	G	0.178	1.57	0.000209909	0.184	0.7	0.692819	0.18	1.26	0.006022	RBM19/TBX5
rs76078492	Imp	12	114635226	C	T	0.216	0.55	0.0002039	0.208	1.306	0.14389	0.213	0.8	0.03411	RBM19/TBX5
rs77092464	Imp	12	116986369	T	C	0.092	1.86	0.000162977	0.095	0.836	0.564689	0.093	1.55	0.007139	MED13L/MAP1LC3B2
rs10850679	Geno	12	117029965	A	G	0.269	1.47	0.000681975	0.274	0.805	0.444939	0.27	1.24	0.02273	MAP1LC3B2/C12orf49
rs1357418	Imp	12	126453425	G	A	0.071	2.15	2.82311e-07	0.072	0.77	0.454126	0.072	1.74	0.0002286	TMEM132B/TMEM132C
rs117970560	Imp	12	126588315	G	A	0.059	2.05	0.000137667	0.055	0.785	0.444599	0.058	1.66	0.009003	TMEM132B/TMEM132C
rs12307319	Imp	12	128594022	C	T	0.243	1.65	0.000540919	0.246	1.128	0.644061	0.244	1.47	0.002235	TMEM132B/TMEM132C
rs4759535	Imp	12	129723381	A	G	0.787	0.67	0.000420059	0.782	1.066	0.690606	0.785	0.77	0.002117	TMEM132D
rs10847911	Imp	12	130088805	A	C	0.444	0.65	0.000527137	0.444	1.059	0.602059	0.444	0.76	0.0132	TMEM132D
rs58397358	Imp	12	132330938	T	C	0.338	0.66	0.000539671	0.345	0.984	0.717408	0.341	0.77	0.01023	MMP17
rs143290372	Imp	13	25957084	A	G	0.061	1.96	0.000362134	0.054	0.712	0.448092	0.059	1.59	0.01563	ATP8A2
rs7329181	Imp	13	29166582	T	C	0.781	0.6	3.12141e-05	0.788	0.709	0.0412934	0.783	0.63	5.067e-06	FLT1/POMP
rs74341505	Imp	13	30679667	T	C	0.163	1.72	3.04632e-05	0.17	0.499	0.0199044	0.165	1.31	0.04879	UBL3/KATNAL1
rs208418	Geno	13	33154022	T	C	0.64	0.64	0.000297808	0.615	0.945	0.933498	0.632	0.73	0.003088	N4BP2L2/PDS5B
rs1170994	Geno	13	36581177	T	C	0.168	1.62	0.000905999	0.173	0.777	0.602633	0.17	1.34	0.0183	DCLK1
rs2324331	Geno	13	40082531	A	G	0.743	0.68	0.000910795	0.73	0.727	0.0528155	0.739	0.7	0.0001344	LHFP
rs1885765	Geno	13	40187765	C	T	0.605	0.68	0.000861564	0.592	0.694	0.00985163	0.601	0.68	2.511e-05	LHFP/COG6
rs3803250	Imp	13	43502200	G	A	0.149	0.48	0.000236444	0.136	0.83	0.415602	0.144	0.6	0.0005801	EPSTI1
rs7994971	Imp	13	48155741	C	T	0.087	2.02	0.000898888	0.081	0.729	0.151663	0.085	1.66	0.06897	HTR2A/SUCLA2
rs11617234	Imp	13	50948954	G	A	0.067	1.8	0.000699123	0.062	0.686	0.347614	0.065	1.52	0.03013	DLEU1
rs797481	Imp	13	51213394	G	A	0.516	0.64	0.000456492	0.527	0.793	0.593238	0.52	0.69	0.00171	DLEU1
rs75017600	Imp	13	55034234	A	G	0.052	2.14	7.62224e-05	0.051	0.872	0.873599	0.051	1.77	0.00202	OLFM4/PRR20A
rs9598764	Imp	13	64852824	T	C	0.052	2.38	9.36159e-05	0.053	1.001	0.88003	0.052	1.92	0.001231	PCDH20/PCDH9
rs56704152	Imp	13	69179293	T	C	0.163	1.56	0.000793957	0.161	0.893	0.560918	0.162	1.33	0.01863	PCDH9/KLHL1
rs74092017	Imp	13	70958084	C	T	0.064	1.8	0.000635686	0.05	1.391	0.49323	0.06	1.69	0.001607	ATXN8OS/DACH1
rs1537063	Imp	13	78528234	T	C	0.111	1.83	9.84331e-05	0.102	0.824	0.440476	0.108	1.51	0.007498	EDNRB/POU4F1
rs78704643	Imp	13	79328458	G	A	0.064	2.31	0.000106642	0.077	1.59	0.187041	0.068	2.05	9.595e-05	RNF219/RBM26
rs9545898	Geno	13	82444523	C	T	0.632	0.62	5.82835e-06	0.64	1.264	0.172338	0.634	0.75	0.00459	SPRY2/SLITRK1
rs9514461	Geno	13	88883500	C	T	0.104	0.46	0.000992607	0.099	1.056	0.673729	0.102	0.67	0.01648	SLITRK5
rs1330470	Imp	13	92549622	C	T	0.28	0.53	0.00089514	0.263	0.982	0.772499	0.274	0.67	0.01243	GPC5
rs483751	Imp	13	93717164	A	G	0.445	1.58	7.63161e-05	0.461	1.261	0.132133	0.45	1.46	4.576e-05	GPC5-IT1/GPC6
rs9556744	Imp	13	98223123	A	G	0.731	1.8	0.000175605	0.736	1.011	0.942752	0.733	1.41	0.002212	RAP2A/IPO5
rs4772148	Geno	13	99444327	A	G	0.081	1.88	0.000910304	0.096	1.449	0.109531	0.086	1.72	0.0002961	SLC15A1/DOCK9
rs12873521	Imp	13	101957405	T	C	0.305	0.63	0.000658549	0.321	1.414	0.142337	0.31	0.87	0.06179	NALCN
rs4771391	Imp	13	101974163	G	A	0.35	1.58	0.000480609	0.326	0.752	0.0667952	0.342	1.26	0.08565	NALCN
rs701562	Imp	13	103622720	A	T	0.278	1.6	6.08148e-05	0.284	1.241	0.230507	0.28	1.47	8.236e-05	ERCC5/SLC10A2
rs2065548	Geno	13	104153307	A	G	0.934	0.43	1.53632e-05	0.927	0.967	0.839728	0.932	0.54	0.0003213	SLC10A2/DAOA
rs2246308	Imp	13	106613273	G	A	0.735	1.68	0.000267425	0.727	1.035	0.694318	0.733	1.38	0.006974	DAOA/EFNB2
rs66481427	Imp	13	108869638	C	T	0.08	1.81	0.000592304	0.073	1.125	0.591333	0.078	1.61	0.01453	LIG4
rs4773321	Geno	13	111745599	T	G	0.454	0.69	0.000808058	0.444	1.122	0.391501	0.451	0.82	0.02888	ANKRD10-IT1/ARHGEF7
rs12586792	Geno	14	20470903	C	T	0.169	1.63	0.000945829	0.194	0.633	0.0770966	0.177	1.27	0.1077	OR4K15/OR4K14
rs1886054	Imp	14	25441887	C	G	0.099	1.71	0.000930814	0.093	1.334	0.131458	0.097	1.59	0.0003722	STXBP6
rs10136415	Imp	14	42273740	A	C	0.077	1.63	0.000490459	0.089	0.544	0.121886	0.081	1.3	0.0595	LRFN5
rs1252951	Imp	14	45728734	G	A	0.739	0.59	2.4009e-05	0.758	0.859	0.924415	0.745	0.66	0.0005531	MIS18BP1/RPL10L
rs17831163	Geno	14	51875282	C	T	0.07	2.08	0.000105845	0.052	0.978	0.919773	0.064	1.79	0.002227	TMX1/FRMD6
rs55802703	Imp	14	53900438	G	A	0.102	1.93	0.000141588	0.102	1.162	0.879755	0.102	1.65	0.00163	DDHD1/BMP4
rs1952883	Geno	14	56381399	G	A	0.269	1.52	0.000409463	0.252	1.115	0.544096	0.264	1.39	0.001361	KTN1/PELI2
rs78893099	Imp	14	62889757	C	T	0.301	0.68	0.000939397	0.321	1.059	0.546187	0.308	0.8	0.02133	SYT16/KCNH5
rs61981586	Imp	14	69391795	T	C	0.204	1.57	0.00058597	0.191	0.89	0.615814	0.2	1.35	0.01363	ACTN1
rs118180282	Imp	14	71053306	G	A	0.069	0.29	0.00015633	0.068	1.164	0.766071	0.069	0.64	0.001292	MED6
rs177387	Geno	14	73728957	A	G	0.513	0.67	0.000351316	0.517	0.929	0.326928	0.514	0.74	0.0005458	PAPLN
rs72688934	Imp	14	79653086	G	C	0.051	2.45	8.57774e-05	0.052	1.15	0.680192	0.051	1.98	0.0006643	NRXN3
rs73348837	Imp	14	83441115	A	C	0.174	1.48	0.000958631	0.157	1.264	0.54683	0.168	1.42	0.002577	SEL1L/FLRT2
rs77950641	Imp	14	85943727	G	T	0.089	1.95	4.77948e-05	0.089	1.1	0.88708	0.089	1.7	0.001443	FLRT2
rs3866768	Imp	14	86034621	C	G	0.639	0.65	0.000529611	0.635	1.002	0.799081	0.638	0.74	0.008392	FLRT2
rs1286927	Imp	14	90481956	G	A	0.95	0.45	0.000283053	0.944	0.488	0.222444	0.948	0.46	0.0002676	TDP1
rs1748935	Geno	14	96140559	G	A	0.56	1.46	0.000629033	0.553	1.305	0.195798	0.558	1.41	0.0004342	TCL6
rs1022591	Imp	14	97561125	C	T	0.162	1.52	0.000503325	0.176	1.202	0.28346	0.167	1.41	0.0005915	VRK1/C14orf64
rs11851037	Imp	14	104767703	T	C	0.34	1.61	0.000199437	0.344	0.986	0.938641	0.341	1.36	0.003219	C14orf144/TMEM179
rs4283166	Imp	14	104888387	T	C	0.165	1.7	9.09511e-05	0.157	0.779	0.491123	0.162	1.39	0.006172	C14orf144/TMEM179
rs7496584	Imp	15	23877607	C	A	0.734	0.64	0.000323879	0.764	1.078	0.653233	0.744	0.75	0.001585	MKRN3/MAGEL2
rs6576428	Imp	15	25721034	C	A	0.901	0.56	0.000682527	0.911	1.162	0.509915	0.905	0.68	0.001788	UBE3A/ATP10A
rs12437614	Geno	15	27706661	A	G	0.061	1.77	0.000333139	0.079	1.412	0.327217	0.067	1.64	0.0005243	GABRG3
rs4779509	Imp	15	31444123	A	G	0.347	1.51	0.000341646	0.361	1.137	0.578191	0.351	1.37	0.001323	TRPM1
rs75221326	Imp	15	33890308	T	C	0.06	0.27	0.000752668	0.059	1.448	0.377838	0.06	0.78	0.02881	RYR3
rs17817518	Geno	15	33990620	A	G	0.414	0.62	0.000212395	0.403	0.979	0.736584	0.411	0.73	0.005452	RYR3
rs1027487	Imp	15	36059589	A	C	0.418	1.62	3.25975e-05	0.416	1.236	0.473338	0.417	1.48	0.0001649	DPH6/C15orf41
rs12903469	Imp	15	36818580	T	C	0.44	1.63	5.11284e-05	0.428	1.002	0.988249	0.436	1.38	0.001089	DPH6/C15orf41
rs12439571	Geno	15	38931396	T	C	0.146	0.52	0.000983758	0.136	1.004	0.950101	0.142	0.7	0.008974	RASGRP1/C15orf53
rs17601140	Imp	15	39111663	G	C	0.311	0.66	0.00066542	0.305	0.863	0.430873	0.309	0.72	0.001349	C15orf53/C15orf54
rs72740282	Imp	15	53072430	A	G	0.056	2.1	0.000174755	0.057	0.949	0.58691	0.056	1.72	0.007026	ONECUT1
rs2460	Imp	15	53073084	A	G	0.264	0.57	0.000568441	0.274	1.175	0.442356	0.267	0.77	0.0206	ONECUT1
rs28718018	Imp	15	54482532	C	A	0.062	1.79	0.000313087	0.068	1.304	0.125783	0.064	1.62	0.0001398	UNC13C
rs8042641	Geno	15	58078411	T	C	0.223	1.52	0.000905706	0.227	0.871	0.776573	0.224	1.29	0.01241	POLR2M/ALDH1A2
rs17191554	Imp	15	60943240	A	C	0.065	2.45	6.00298e-05	0.067	0.788	0.524111	0.066	1.82	0.004388	RORA
rs17237486	Imp	15	61204281	C	T	0.186	0.5	0.000776954	0.187	0.961	0.959039	0.186	0.66	0.006264	RORA
rs7166405	Geno	15	79125327	G	A	0.935	0.51	0.000229187	0.927	1.181	0.937949	0.932	0.64	0.002616	MORF4L1
rs28799307	Imp	15	87776235	T	G	0.119	1.74	0.00019343	0.123	0.629	0.313648	0.12	1.38	0.01643	AGBL1/NTRK3
rs1878327	Geno	15	89450546	T	C	0.62	0.69	0.000984657	0.612	1.086	0.561825	0.617	0.8	0.02115	MFGE8
rs4777735	Imp	15	92741192	A	G	0.614	0.65	0.000555497	0.637	0.939	0.870447	0.621	0.73	0.007365	SLCO3A1/ST8SIA2
rs17598755	Imp	15	92814235	A	G	0.332	0.6	0.000344275	0.35	0.814	0.310041	0.338	0.67	0.0004974	SLCO3A1/ST8SIA2
rs11074258	Imp	15	94770799	C	T	0.44	0.6	0.000298244	0.433	1.187	0.248377	0.437	0.78	0.02621	RGMA/MCTP2
rs1457849	Imp	15	95531631	C	T	0.95	0.48	0.000181737	0.948	1.21	0.407212	0.949	0.59	0.0118	MCTP2/NR2F2
rs11857915	Imp	15	100397213	G	A	0.1	1.9	0.000116347	0.098	0.535	0.0873841	0.1	1.49	0.03719	LYSMD4/ADAMTS17
rs41286699	Imp	16	2086191	C	T	0.068	2.57	0.000266607	0.067	0.949	0.964052	0.068	2.01	0.003086	SLC9A3R2
rs11642607	Geno	16	6091028	G	A	0.305	0.68	0.000919198	0.315	1.368	0.207677	0.308	0.9	0.05526	RBFOX1
rs111472205	Imp	16	9225598	G	C	0.135	0.46	0.000402022	0.136	1.496	0.113372	0.135	0.82	0.05673	C16orf72/GRIN2A
rs12103238	Imp	16	9552304	C	A	0.05	2.38	3.49652e-06	0.047	0.674	0.471695	0.049	1.94	0.0009544	C16orf72/GRIN2A
rs2027817	Imp	16	13625931	C	T	0.572	1.58	0.000472775	0.594	0.743	0.229998	0.579	1.21	0.03588	SHISA9/ERCC4
rs4781499	Imp	16	13630944	G	A	0.135	1.7	0.000215829	0.152	1.049	0.393816	0.14	1.46	0.000497	SHISA9/ERCC4
rs12918744	Imp	16	17155844	T	C	0.146	1.7	0.000951004	0.143	1.045	0.977167	0.145	1.46	0.008269	NPIPA7/XYLT1
rs8058903	Geno	16	21106476	A	G	0.33	0.64	0.000849015	0.321	0.942	0.495108	0.327	0.74	0.00201	DNAH3
rs9922288	Imp	16	24550930	G	A	0.78	1.82	0.000205878	0.786	1.01	0.780697	0.782	1.42	0.004805	RBBP6
rs2347641	Imp	16	27198201	G	A	0.915	4.13	0.000218403	0.913	0.706	0.271666	0.914	1.34	0.02034	C16orf82/KDM8
rs3093315	Imp	16	27444030	T	G	0.448	1.5	0.000420179	0.445	0.846	0.446956	0.447	1.25	0.01709	IL21R
rs7189846	Imp	16	50844735	G	T	0.094	1.9	0.000206337	0.098	0.991	0.572635	0.095	1.61	0.008059	CYLD/SALL1
rs12597518	Geno	16	52358894	A	G	0.111	1.91	0.000104348	0.108	0.593	0.174612	0.11	1.48	0.02066	C16orf97/TOX3
rs71373292	Imp	16	52947890	A	G	0.149	1.62	0.0004571	0.141	1.792	0.00603282	0.146	1.67	8.564e-06	CASC16/CHD9
rs12926239	Imp	16	54200127	A	G	0.309	1.48	0.000618891	0.33	1.169	0.225409	0.316	1.38	0.0005135	FTO-IT1/IRX3
rs11647194	Imp	16	55008253	T	C	0.206	1.58	0.000172914	0.209	1.103	0.415225	0.207	1.41	0.000457	IRX5/IRX6
rs72795504	Imp	16	57716020	T	C	0.119	0.47	0.000721196	0.114	1.399	0.120645	0.117	0.8	0.07228	GPR97
rs55927729	Imp	16	60976178	G	A	0.209	0.57	0.000366172	0.196	1.166	0.560978	0.205	0.77	0.01172	GOT2/CDH8
rs1532639	Imp	16	61093283	G	C	0.27	0.54	3.62898e-05	0.255	1.427	0.179039	0.265	0.8	0.01163	GOT2/CDH8
rs310333	Imp	16	71579667	C	A	0.748	0.69	0.000400028	0.737	0.82	0.289262	0.744	0.73	0.0005071	ZNF19
rs8060607	Imp	16	72499136	A	G	0.17	1.54	0.000435446	0.177	0.894	0.268728	0.172	1.32	0.02986	PMFBP1/ZFHX3
rs8046158	Imp	16	74596189	A	G	0.47	1.44	0.000875509	0.482	1.008	0.486628	0.474	1.28	0.02363	GLG1
rs7200349	Imp	16	78904045	C	G	0.36	0.58	4.44082e-05	0.362	0.792	0.263155	0.361	0.65	7.846e-05	WWOX
rs7203648	Imp	16	78915391	C	T	0.35	1.64	1.85973e-05	0.343	1.271	0.0519015	0.348	1.52	4.257e-06	WWOX
rs4258599	Imp	16	85293483	C	T	0.342	1.47	0.000671488	0.326	1.038	0.617	0.337	1.32	0.01476	FAM92B/GSE1
rs16975473	Imp	16	85313456	A	G	0.066	2.06	0.000608651	0.063	0.496	0.0842145	0.065	1.65	0.08349	FAM92B/GSE1
rs9924314	Imp	16	86723622	C	T	0.47	0.58	4.33868e-06	0.482	0.725	0.140027	0.474	0.63	4.827e-06	FOXL1/C16orf95
rs8061521	Imp	16	87272969	G	A	0.292	1.53	8.9032e-05	0.27	0.91	0.467332	0.284	1.32	0.006531	C16orf95
rs74740294	Imp	16	88387968	G	C	0.059	2.27	0.000972944	0.057	1.106	0.765976	0.058	1.91	0.01329	BANP/ZNF469
rs8074778	Imp	17	122770	G	A	0.366	1.64	0.00077233	0.375	1.068	0.960581	0.369	1.44	0.007471	RPH3AL
rs9903406	Imp	17	148511	T	C	0.881	0.55	0.000639874	0.882	0.755	0.043927	0.881	0.61	8.04e-05	RPH3AL
rs62069957	Imp	17	3579282	C	T	0.051	2.67	1.26258e-05	0.041	0.897	0.836593	0.048	2.17	0.0002785	P2RX5-TAX1BP3/P2RX5
rs12935952	Imp	17	7063555	C	A	0.05	0.16	0.000960065	0.049	0.798	0.672181	0.05	0.44	0.003647	ASGR2/ASGR1
rs12150519	Imp	17	7201681	A	G	0.114	1.8	0.000333607	0.115	0.938	0.573212	0.114	1.52	0.01075	YBX2/EIF5A
rs4791792	Imp	17	9022496	T	A	0.597	0.66	0.00079364	0.607	0.968	0.901293	0.6	0.75	0.00557	NTN1
rs11867458	Imp	17	10126367	C	T	0.296	0.64	0.000364243	0.3	0.932	0.654343	0.297	0.74	0.00173	AC000003.2/MYH13
rs72811234	Imp	17	12544696	T	C	0.063	2.15	0.000324708	0.058	1.497	0.4472	0.061	1.96	0.0008291	MAP2K4/MYOCD
rs10521248	Geno	17	13867878	T	C	0.266	1.51	0.00011741	0.29	1.075	0.999765	0.274	1.35	0.001951	HS3ST3A1/COX10
rs7225141	Geno	17	17570827	C	T	0.588	0.68	0.000293916	0.565	1.054	0.585293	0.581	0.79	0.001211	PEMT/SMCR2
rs60124448	Imp	17	48611381	A	T	0.054	1.93	0.000569864	0.053	1.066	0.647249	0.053	1.69	0.002341	EPN3
rs1503045	Imp	17	50228785	C	A	0.676	0.68	0.000517327	0.682	0.908	0.425035	0.678	0.74	0.00109	CA10
rs973633	Geno	17	50342813	A	G	0.654	1.81	1.19232e-05	0.677	1.207	0.463728	0.662	1.57	7.577e-05	CA10/C17orf112
rs112217230	Imp	17	54723977	C	T	0.128	1.82	0.000305678	0.132	0.964	0.675543	0.129	1.53	0.007928	NOG/C17orf67
rs75851452	Imp	17	54784164	T	C	0.051	2	0.000981709	0.051	0.593	0.134253	0.051	1.6	0.07827	NOG/C17orf67
rs11079433	Geno	17	59584889	A	G	0.951	0.54	0.000365882	0.944	0.971	0.91332	0.949	0.64	0.003381	TBX4/NACA2
rs4968514	Imp	17	60395500	A	G	0.912	0.55	0.000156146	0.908	1.184	0.950928	0.91	0.67	0.002086	MED13/EFCAB3
rs56298461	Imp	17	75805042	T	G	0.413	1.4	0.00099188	0.428	0.979	0.880067	0.418	1.24	0.006181	40057/TNRC6C
rs112612767	Imp	17	78273547	G	T	0.053	2.06	8.77373e-05	0.05	1.579	0.164753	0.052	1.91	6.887e-05	RNF213
rs55877247	Imp	17	79259417	T	C	0.094	1.72	0.000360535	0.094	0.749	0.37639	0.094	1.39	0.0191	SLC38A10
rs2846586	Imp	18	906343	C	T	0.531	0.59	0.0003586	0.539	0.794	0.408404	0.533	0.65	0.0007749	ADCYAP1
rs1462972	Imp	18	4374966	C	A	0.169	0.47	0.000179294	0.177	0.632	0.10437	0.171	0.53	6.939e-05	DLGAP1
rs78118558	Imp	18	5287881	C	T	0.092	0.29	0.0001065	0.096	0.79	0.514778	0.093	0.49	0.0004584	C18orf42/ZBTB14
rs7228249	Imp	18	7352006	T	C	0.126	1.72	0.000959426	0.123	0.783	0.592117	0.125	1.42	0.01941	LRRC30/PTPRM
rs1531071	Imp	18	9658078	T	C	0.712	0.67	0.000708028	0.703	1.341	0.200766	0.71	0.81	0.0496	PPP4R1/RAB31
rs643652	Geno	18	11884670	G	C	0.558	1.52	0.000718972	0.54	0.954	0.982553	0.552	1.29	0.006783	GNAL/MPPE1
rs72877635	Imp	18	13138170	C	T	0.072	1.85	0.000417831	0.083	0.533	0.0968083	0.076	1.42	0.06414	CEP192/LDLRAD4
rs9283030	Imp	18	14791932	C	G	0.292	1.62	0.000331532	0.286	0.914	0.553116	0.29	1.36	0.01126	ANKRD30B
rs7243764	Imp	18	21934556	C	T	0.259	1.64	2.57179e-05	0.288	1.151	0.562281	0.268	1.46	0.0001922	OSBPL1A
rs520674	Imp	18	22102471	A	G	0.546	1.48	0.000632929	0.552	0.949	0.686989	0.548	1.27	0.01211	HRH4/ZNF521
rs72962274	Imp	18	32510908	G	C	0.178	1.47	0.000568296	0.167	0.859	0.61473	0.175	1.27	0.01341	DTNA/MAPRE2
rs4890448	Imp	18	38456754	T	C	0.087	0.4	0.000770485	0.092	1.362	0.322258	0.088	0.77	0.03428	PIK3C3
rs77169990	Imp	18	41214033	T	C	0.053	2.14	1.22144e-05	0.049	0.981	0.776315	0.052	1.8	0.0008113	SYT4/SETBP1
rs12326162	Geno	18	43409682	T	C	0.475	1.62	3.04381e-05	0.471	1.113	0.596902	0.473	1.42	0.0002442	SIGLEC15
rs62095410	Imp	18	43504422	A	T	0.313	1.56	0.000928268	0.293	0.698	0.0270726	0.307	1.24	0.1771	EPG5
rs28505643	Imp	18	45081583	T	A	0.147	0.44	0.000233837	0.16	1.381	0.167974	0.151	0.76	0.03236	SKOR2/SMAD2
rs72911607	Imp	18	46226498	A	G	0.112	1.69	0.000511463	0.104	1.352	0.347123	0.109	1.59	0.0007984	CTIF
rs4500815	Imp	18	46332908	G	A	0.758	0.61	0.00074845	0.755	1.168	0.641942	0.757	0.74	0.01489	CTIF
rs1699903	Imp	18	49220616	A	C	0.358	0.63	0.000222627	0.329	1.009	0.873953	0.348	0.74	0.002187	MEX3C/DCC
rs12968882	Imp	18	55303782	T	C	0.352	1.48	0.000827064	0.361	1.409	0.0716508	0.355	1.45	0.0001702	NARS/ATP8B1
rs12953421	Imp	18	59522565	C	T	0.055	1.96	0.000977841	0.054	1.827	0.10391	0.055	1.92	0.000297	RNF152
rs1243056	Imp	18	61508463	G	A	0.05	2.31	5.40174e-05	0.046	1.029	0.338492	0.049	1.92	0.0001356	SERPINB7/SERPINB2
rs1243063	Imp	18	61513490	C	T	0.257	1.82	7.38399e-07	0.252	0.974	0.519787	0.255	1.49	1.274e-05	SERPINB7/SERPINB2
rs12456844	Imp	18	63111628	A	C	0.107	1.94	0.000593737	0.112	1.183	0.859215	0.108	1.69	0.004135	SERPINB8/CDH7
rs8097398	Geno	18	66508709	G	A	0.926	0.55	0.000663441	0.926	0.817	0.646991	0.926	0.61	0.002611	CCDC102B
rs1244822	Imp	18	69020178	T	C	0.055	2.21	4.80705e-05	0.05	0.693	0.285365	0.053	1.8	0.008428	GTSCR1/CBLN2
rs1979228	Geno	18	69142420	A	C	0.182	1.56	0.00018024	0.178	1.344	0.28607	0.181	1.49	0.0002662	GTSCR1/CBLN2
rs56205922	Imp	18	72842319	C	T	0.47	0.64	0.000345884	0.436	1.341	0.183011	0.459	0.83	0.03691	ZNF407/ZADH2
rs8097739	Imp	18	74912348	T	C	0.864	0.56	0.000491628	0.856	0.799	0.254779	0.862	0.62	0.0005016	MBP/GALR1
rs1876172	Imp	18	75625579	G	T	0.77	0.66	0.00089266	0.774	0.95	0.695585	0.771	0.74	0.003677	GALR1/SALL3
rs2392646	Imp	19	2526812	T	G	0.736	1.73	0.00023281	0.738	0.935	0.818353	0.737	1.34	0.004747	GNG7
rs34574464	Imp	19	3530433	C	G	0.285	1.5	0.000366024	0.283	0.831	0.372446	0.285	1.25	0.01949	FZR1
rs56138847	Imp	19	4940874	G	A	0.141	1.65	0.000297526	0.139	1.114	0.654928	0.14	1.49	0.001498	UHRF1
rs61027285	Imp	19	5805658	G	A	0.179	1.49	0.000804688	0.153	1.685	0.000811326	0.171	1.54	2.795e-06	DUS3L/NRTN
rs113920989	Imp	19	11859594	C	T	0.055	1.98	0.000761961	0.061	0.666	0.881492	0.057	1.53	0.008822	ZNF823/ZNF441
rs16035	Imp	19	13356150	G	T	0.588	1.57	0.000489607	0.57	0.996	0.943173	0.582	1.32	0.004421	CACNA1A
rs35983811	Imp	19	15133289	T	C	0.148	1.52	0.000888609	0.156	0.827	0.841669	0.151	1.29	0.01064	SLC1A6/CCDC105
rs17699261	Geno	19	19819843	G	A	0.055	1.82	0.000906517	0.052	0.879	0.972529	0.054	1.51	0.008092	ZNF101/ZNF14
rs33850	Imp	19	34024710	T	C	0.719	0.54	7.39292e-08	0.694	0.905	0.378321	0.711	0.63	1.224e-06	PEPD/CHST8
rs114346511	Imp	19	41671391	A	G	0.068	1.87	5.92576e-05	0.072	0.895	0.593521	0.069	1.57	0.003584	CYP2F1/CYP2S1
rs10411127	Imp	19	43603453	C	T	0.076	2.61	0.000572751	0.076	1.104	0.930778	0.076	2.05	0.004776	PSG2/PSG5
rs113826819	Imp	19	47257895	A	G	0.116	1.95	3.59358e-05	0.134	0.588	0.116	0.122	1.49	0.01687	FKRP
rs12459058	Imp	19	47274138	C	T	0.37	1.5	0.000573917	0.388	0.76	0.0878314	0.376	1.21	0.0792	FKRP
rs12462954	Imp	19	50204367	T	C	0.091	1.93	0.000253909	0.091	1.215	0.449873	0.091	1.7	0.0006955	CPT1C
rs12162228	Imp	19	51061515	T	C	0.407	0.62	0.000857678	0.404	1.098	0.981588	0.406	0.75	0.007043	LRRC4B
rs57098159	Imp	19	53613825	G	C	0.053	1.97	0.00027728	0.052	1.892	0.0495007	0.053	1.95	4.289e-05	ZNF415
rs684459	Imp	19	54533804	C	T	0.696	0.64	0.000360283	0.68	1.078	0.792766	0.691	0.76	0.006663	CACNG6/VSTM1
rs8108282	Geno	19	56689969	G	T	0.366	1.48	0.000132416	0.371	1.095	0.878202	0.367	1.35	0.002856	GALP
rs12977035	Imp	19	57296753	T	C	0.307	0.64	0.000167196	0.3	0.744	0.154394	0.305	0.68	0.0001072	ZIM2
rs12480156	Imp	20	607594	T	C	0.307	1.47	0.000516069	0.309	1.156	0.60416	0.307	1.37	0.00193	TCF15/SRXN1
rs62211243	Imp	20	4107692	A	G	0.121	1.81	0.000201305	0.119	1.372	0.156161	0.12	1.68	0.0001268	SMOX
rs6105182	Imp	20	13877161	A	C	0.417	1.37	0.000651927	0.407	0.935	0.898002	0.413	1.21	0.004832	SEL1L2
rs73103517	Imp	20	15883156	C	G	0.21	0.45	0.000143204	0.212	1.032	0.673461	0.211	0.65	0.000937	MACROD2
rs6034447	Imp	20	16281884	T	C	0.658	0.68	0.000418263	0.659	0.623	0.00166776	0.658	0.66	2.527e-06	KIF16B
rs28442115	Imp	20	18110196	T	C	0.178	1.52	0.000612068	0.179	0.993	0.719206	0.179	1.35	0.01102	MGME1/PET117
rs2425862	Imp	20	44931564	G	A	0.475	1.61	0.000606455	0.472	0.931	0.735878	0.474	1.32	0.01055	CDH22
rs2273102	Imp	20	47589122	C	T	0.246	1.61	0.000359255	0.231	1.023	0.891583	0.241	1.4	0.005287	ARFGEF2
rs13039591	Imp	20	50402269	A	G	0.282	0.61	0.000675831	0.283	0.609	0.0228646	0.283	0.61	4.384e-05	SALL4
rs55850738	Imp	20	50653719	G	A	0.199	1.61	0.000789368	0.212	1.052	0.660724	0.203	1.42	0.003072	SALL4/ZFP64
rs2143666	Imp	20	56145467	T	A	0.929	0.55	0.000189415	0.924	0.779	0.182762	0.927	0.61	0.0001483	PCK1/ZBP1
rs73302904	Imp	20	56221077	C	T	0.051	2.09	0.000433595	0.059	2.373	0.0505589	0.053	2.19	6.553e-05	ZBP1/PMEPA1
rs1129659	Geno	20	61880169	G	T	0.388	0.67	0.0007076	0.374	0.86	0.4468	0.384	0.74	0.001494	NKAIN4
rs987980	Imp	21	18420759	G	A	0.846	0.62	0.000961534	0.844	1.075	0.592879	0.846	0.72	0.002948	USP25/C21orf37
rs80011250	Imp	21	22443945	C	A	0.076	1.7	0.000599496	0.087	1.259	0.595685	0.079	1.55	0.002101	NCAM2
rs2826861	Imp	21	22859922	T	C	0.234	1.47	0.000871599	0.232	1.21	0.353353	0.234	1.38	0.001242	NCAM2
rs76608969	Imp	21	24469483	G	A	0.05	2.03	0.000999138	0.051	0.515	0.135596	0.05	1.6	0.07843	NCAM2/7SK
rs2257678	Imp	21	25780193	T	A	0.229	1.63	0.00010253	0.218	0.862	0.514292	0.226	1.38	0.006205	NCAM2/7SK
rs1541289	Imp	21	25922448	A	C	0.118	1.6	0.000794791	0.124	0.929	0.916391	0.12	1.37	0.008397	7SK
rs1236408	Imp	21	29727595	T	C	0.191	1.49	0.000986094	0.212	0.827	0.343605	0.198	1.25	0.0369	ADAMTS5/N6AMT1
rs2834181	Geno	21	34680395	A	C	0.453	1.55	0.000160324	0.452	1.322	0.037304	0.452	1.47	1.926e-05	IL10RB/IFNAR1
rs2776278	Imp	21	37342699	A	G	0.233	1.63	0.000214984	0.233	0.842	0.319162	0.233	1.35	0.0171	RUNX1
rs858026	Geno	21	39104499	A	G	0.427	0.62	3.96222e-05	0.421	1.03	0.999639	0.425	0.75	0.0009476	KCNJ6
rs9975213	Imp	21	41391844	T	C	0.168	1.79	0.000134847	0.16	1.007	0.641677	0.165	1.52	0.0008173	DSCAM
rs7280615	Imp	21	41532663	G	A	0.257	0.6	0.000707092	0.275	0.9	0.547776	0.263	0.7	0.002062	DSCAM
rs2329717	Imp	21	45652644	A	G	0.519	0.65	0.000110674	0.512	1.028	0.821965	0.517	0.76	0.001183	ICOSLG
rs114832456	Imp	21	46918277	A	G	0.107	1.71	0.00046887	0.105	0.958	0.852403	0.106	1.45	0.003457	COL18A1/SLC19A1
rs62214331	Imp	21	46974927	T	C	0.317	0.61	0.000605165	0.314	0.987	0.977482	0.316	0.73	0.005522	SLC19A1/PCBP3
rs56306832	Imp	22	20291030	C	G	0.082	1.71	0.000808771	0.09	1.489	0.212729	0.085	1.64	0.0005933	RTN4R/DGCR6L
rs78211411	Imp	22	22581797	A	G	0.097	1.83	0.000858693	0.113	1.609	0.00999796	0.102	1.75	2.537e-05	IGLV10-54/VPREB1
rs73166891	Imp	22	23377494	G	A	0.137	1.59	0.000386435	0.148	1.421	0.0990344	0.141	1.53	0.0001257	IGLC7/RTDR1
rs2007386	Imp	22	25109069	C	T	0.206	1.59	0.000130636	0.208	1.01	0.992568	0.206	1.39	0.002055	FAM211B/PIWIL3
rs17668246	Imp	22	25474566	G	A	0.152	0.48	0.000332499	0.139	1.134	0.826285	0.148	0.7	0.002556	KIAA1671
rs62235636	Imp	22	28324924	T	C	0.072	2.06	0.00066253	0.065	1.102	0.384482	0.07	1.74	0.001134	PITPNB/TTC28
rs5753638	Imp	22	31869892	C	T	0.062	1.89	0.000244828	0.059	0.43	0.056602	0.061	1.53	0.06922	DRG1/EIF4ENIF1
rs5754830	Imp	22	34478724	G	A	0.32	0.62	0.000339227	0.307	0.966	0.729946	0.316	0.73	0.002021	LARGE-IT1/ISX
rs9622966	Imp	22	39579449	T	C	0.12	2.03	5.64581e-07	0.119	0.661	0.131696	0.12	1.61	0.00176	CBX7/PDGFB
rs12628962	Imp	22	39872073	G	A	0.194	1.65	0.000506066	0.2	1.001	0.92655	0.196	1.42	0.006104	MGAT3
rs760771	Imp	22	43476432	T	G	0.851	0.58	0.000345107	0.859	1.176	0.322215	0.853	0.69	0.02201	TTLL1
rs4076059	Imp	22	43888664	G	A	0.476	0.7	0.000806369	0.46	0.847	0.334112	0.471	0.75	0.00108	MPPED1
rs3788627	Imp	22	45188089	G	A	0.334	1.69	9.54982e-06	0.335	1.315	0.150969	0.334	1.56	1.014e-05	PRR5-ARHGAP8/ARHGAP8
rs7287869	Imp	22	45697923	G	C	0.089	2.04	7.47549e-05	0.082	1.042	0.539645	0.087	1.75	0.0003853	UPK3A/FAM118A
rs131114	Imp	22	47986332	T	C	0.802	0.59	0.000797251	0.801	1.198	0.728594	0.802	0.72	0.01273	TBC1D22A/FAM19A5
GOFA, Genetics of Food Allergy study; EA, effect allele; AA, alternative allele; AF, effect allele frequency; OR, odds ratio.
a Genomic positions were based on human genome reference assembly GRCh37.p13.
